# Supplementary material for: The Potential Roles of Protein Functional Motifs in Coronavirus Infection<strong> </strong>
Source: Preprints.org preprint supplement (doi:10.20944/preprints202004.0171.v1), 2020-04-10
Supplement: Supplementary file 1 [file supplementary]

## Sheet: Legend
Supplementary table 1: list of motifs encoded by coronaviruses
Supplementary tables 2-11. List of name of proteins harbouring the functional motifs
Supplementary table 2 = "SARS-CoV-2"
Supplementary table 3 = "SARS CoV NS-1"
Supplementary table 4 = "BetaCoV 2c EMC_2012"
Supplementary table 5 = "bat-SL-CoVZC45"
Supplementary table 6 = "Human CoV OC43"
Supplementary table 7 = "Murine CoV MHV-1"
Supplementary table 8 = "BetacCoV Erinaceus VMC"
Supplementary table 9 = "Tylonycteris bat CoV HKU4"
Supplementary table 10 = "Bat CoV HKU5-1"
Supplementary table 11 = "SARS CoV GZ02"
SARS-CoV-2 proteome (obtained from NCBI GenBank) has two protein homologues: orf1a, protein ID = YP_009725295.1; and orf1ab polyprotein, protein ID = YP_009724389.1. The two proteins share 100% identity and 64% coverage.

## Sheet: SI-1 motifs
Supplementary table 1: list of motifs encoded by coronaviruses
"#" means number of proteins harbour this motif "%" means enrichment to entire protein dataset, i.e. number of proteins harbour the motif / total number of proteins		Bat coronavirus BtCoV-279/2005		Bat coronavirus HKU5-1		Bat Hp-betacoronavirus_Zhejiang2013		Bat SARS coronavirus HKU3-12		Bat SARS coronavirus HKU3-7		Bat SARS-like coronavirus isolate bat-SL-CoVZC45		Betacoronavirus England 1 - MERS		Betacoronavirus Erinaceus_VMC/DEU/2012		Betacoronavirus HKU24 strain HKU24-R05005I		Betacoronavirus HKU24 strain HKU24-R05010I		Bovine coronavirus		Coronavirus BtRl-BetaCoV_SC2018		Coronavirus BtRs-BetaCoV_YN2018A		Coronavirus BtRs-BetaCoV_YN2018B		Coronavirus BtRs-BetaCoV_YN2018C		Human betacoronavirus 2c EMC/2012 - MERS-CoV		Human coronavirus HKU1 strain SC2521		Human coronavirus HKU1		Human coronavirus OC43 strain ATCC VR-759		Human coronavirus OC43		Murine coronavirus MHV-1		Murine hepatitis virus strain A59		Pipistrellus bat coronavirus HKU5		Rabbit coronavirus HKU14
	Total number of proteins	9		9		9		11		11		11		10		12		10		10		12		5		5		5		5		11		8		8		8		9		11		10		9		11
Function	Motif	#	%	#	%	#	%	#	%	#	%	#	%	#	%	#	%	#	%	#	%	#	%	#	%	#	%	#	%	#	%	#	%	#	%	#	%	#	%	#	%	#	%	#	%	#	%	#	%
Adenovirus nuclear localization signal (NLS)	KRAR	0	0	0	0	1	0.1111	0	0	0	0	0	0	0	0	0	0	0	0	0	0	0	0	0	0	0	0	0	0	0	0	0	0	0	0	0	0	0	0	0	0	0	0	0	0	0	0	0	0
Binding of virus proteins to retinoblastoma protein, virus replication	LxCxE	0	0	1	0.1111	0	0	0	0	0	0	0	0	1	0.1	1	0.0833	1	0.1	1	0.1	0	0	0	0	0	0	0	0	0	0	1	0.0909	0	0	0	0	0	0	0	0	1	0.0909	1	0.1	1	0.1111	1	0.0909
Binding to ESCRT, paramyxoviruses budding	!PxV	3	0.3333	5	0.5556	4	0.4444	3	0.2727	4	0.3636	2	0.1818	4	0.4	7	0.5833	3	0.3	3	0.3	7	0.5833	2	0.4	2	0.4	2	0.4	2	0.4	4	0.3636	1	0.125	2	0.25	5	0.625	6	0.6667	4	0.3636	5	0.5	5	0.5556	5	0.4545
Binding to ESCRT, paramyxoviruses budding	[FILV]PxV	2	0.2222	3	0.3333	2	0.2222	2	0.1818	2	0.1818	2	0.1818	3	0.3	4	0.3333	3	0.3	3	0.3	5	0.4167	2	0.4	2	0.4	2	0.4	2	0.4	3	0.2727	1	0.125	1	0.125	3	0.375	4	0.4444	3	0.2727	3	0.3	3	0.3333	3	0.2727
Binding to integrins, and viral attachment to cellular receptors	DLxxL	2	0.2222	3	0.3333	3	0.3333	2	0.1818	2	0.1818	2	0.1818	4	0.4	4	0.3333	2	0.2	2	0.2	2	0.1667	2	0.4	2	0.4	2	0.4	2	0.4	4	0.3636	2	0.25	1	0.125	1	0.125	1	0.1111	2	0.1818	2	0.2	3	0.3333	1	0.0909
Binding to integrins, and viral attachment to cellular receptors	IDA	2	0.2222	2	0.2222	2	0.2222	2	0.1818	2	0.1818	2	0.1818	3	0.3	3	0.25	2	0.2	2	0.2	3	0.25	2	0.4	2	0.4	3	0.6	2	0.4	3	0.2727	1	0.125	1	0.125	2	0.25	2	0.2222	2	0.1818	2	0.2	2	0.2222	2	0.1818
Binding to integrins, and viral attachment to cellular receptors	LDV	1	0.1111	1	0.1111	0	0	1	0.0909	1	0.0909	0	0	3	0.3	3	0.25	2	0.2	2	0.2	4	0.3333	2	0.4	1	0.2	1	0.2	1	0.2	3	0.2727	2	0.25	2	0.25	3	0.375	3	0.3333	2	0.1818	4	0.4	1	0.1111	2	0.1818
Binding to integrins, and viral attachment to cellular receptors	SDI	1	0.1111	3	0.3333	1	0.1111	1	0.0909	1	0.0909	1	0.0909	2	0.2	0	0	4	0.4	4	0.4	2	0.1667	1	0.2	1	0.2	1	0.2	1	0.2	2	0.1818	3	0.375	3	0.375	1	0.125	1	0.1111	1	0.0909	2	0.2	3	0.3333	1	0.0909
Binding to integrins, and viral attachment to cellular receptors	YGL	0	0	2	0.2222	0	0	0	0	0	0	0	0	2	0.2	3	0.25	2	0.2	2	0.2	4	0.3333	0	0	0	0	0	0	0	0	2	0.1818	2	0.25	2	0.25	3	0.375	3	0.3333	2	0.1818	3	0.3	2	0.2222	3	0.2727
Binding to integrins, and viral attachment to cellular receptors	RGD	1	0.1111	1	0.1111	0	0	1	0.0909	1	0.0909	2	0.1818	2	0.2	1	0.0833	1	0.1	1	0.1	0	0	1	0.2	1	0.2	1	0.2	1	0.2	2	0.1818	1	0.125	1	0.125	0	0	0	0	2	0.1818	3	0.3	1	0.1111	1	0.0909
Binding to integrins, and viral attachment to cellular receptors	LDI	2	0.2222	0	0	1	0.1111	2	0.1818	2	0.1818	2	0.1818	0	0	0	0	3	0.3	3	0.3	1	0.0833	1	0.2	1	0.2	1	0.2	1	0.2	0	0	2	0.25	1	0.125	1	0.125	1	0.1111	1	0.0909	1	0.1	0	0	1	0.0909
Binding to integrins, and viral attachment to cellular receptors	DGE	1	0.1111	3	0.3333	1	0.1111	1	0.0909	1	0.0909	1	0.0909	2	0.2	2	0.1667	0	0	0	0	0	0	1	0.2	1	0.2	1	0.2	1	0.2	2	0.1818	0	0	0	0	0	0	0	0	0	0	1	0.1	3	0.3333	0	0
Binding to phospholipids, lipid raft-mediated endocytosis	RxLR	0	0	2	0.2222	0	0	0	0	0	0	0	0	1	0.1	0	0	1	0.1	1	0.1	2	0.1667	0	0	0	0	1	0.2	0	0	1	0.0909	0	0	0	0	1	0.125	1	0.1111	0	0	0	0	2	0.2222	0	0
Binding to retinoblastoma protein	[LI]xCx[DE]	1	0.1111	1	0.1111	1	0.1111	1	0.0909	1	0.0909	3	0.2727	1	0.1	1	0.0833	2	0.2	2	0.2	2	0.1667	2	0.4	1	0.2	1	0.2	1	0.2	1	0.0909	2	0.25	2	0.25	2	0.25	2	0.2222	2	0.1818	2	0.2	1	0.1111	2	0.1818
Budded virions production and nucleocapsid assembly (C2HC zinc finger)	Cx(5)Cx(1,)Hx(6)C	2	0.2222	3	0.3333	1	0.1111	2	0.1818	2	0.1818	1	0.0909	2	0.2	3	0.25	1	0.1	1	0.1	2	0.1667	1	0.2	1	0.2	1	0.2	1	0.2	2	0.1818	1	0.125	1	0.125	1	0.125	1	0.1111	1	0.0909	2	0.2	3	0.3333	1	0.0909
Caveolin scaffolding domain (CSD)	[FILV]xxxx[FILV]xx[FILV]	9	1	8	0.8889	8	0.8889	11	1	11	1	10	0.9091	10	1	12	1	10	1	10	1	10	0.8333	5	1	5	1	5	1	5	1	11	1	8	1	8	1	8	1	9	1	11	1	10	1	8	0.8889	9	0.8182
Caveolin scaffolding domain (CSD)	[FILV]x[FILV]xxxx[FILV]	9	1	7	0.7778	9	1	11	1	11	1	10	0.9091	10	1	11	0.9167	9	0.9	9	0.9	10	0.8333	5	1	5	1	5	1	5	1	10	0.9091	7	0.875	7	0.875	8	1	9	1	10	0.9091	9	0.9	7	0.7778	10	0.9091
Caveolin scaffolding domain (CSD)	[FILV]x[FILV]xxxx[FILV]xx[FILV]	8	0.8889	5	0.5556	7	0.7778	10	0.9091	9	0.8182	8	0.7273	7	0.7	8	0.6667	8	0.8	8	0.8	8	0.6667	4	0.8	4	0.8	4	0.8	4	0.8	7	0.6364	7	0.875	7	0.875	6	0.75	6	0.6667	8	0.7273	8	0.8	5	0.5556	7	0.6364
Clathrin-binding motifs, clathrin-box	L!x![DE]	5	0.5556	3	0.3333	3	0.3333	6	0.5455	5	0.4545	6	0.5455	7	0.7	7	0.5833	6	0.6	6	0.6	7	0.5833	4	0.8	4	0.8	4	0.8	4	0.8	6	0.5455	4	0.5	5	0.625	4	0.5	5	0.5556	7	0.6364	7	0.7	3	0.3333	3	0.2727
Clathrin-binding motifs, clathrin-box	L[FILV]x[FILV][DE]	2	0.2222	2	0.2222	0	0	2	0.1818	2	0.1818	3	0.2727	3	0.3	5	0.4167	2	0.2	2	0.2	2	0.1667	3	0.6	2	0.4	2	0.4	2	0.4	3	0.2727	2	0.25	3	0.375	1	0.125	1	0.1111	1	0.0909	2	0.2	2	0.2222	1	0.0909
Clathrin-binding motifs, clathrin-box	L[LI][DEN][LF][DE]	0	0	1	0.1111	0	0	1	0.0909	1	0.0909	0	0	0	0	0	0	0	0	0	0	0	0	0	0	0	0	0	0	0	0	0	0	1	0.125	0	0	0	0	0	0	0	0	0	0	1	0.1111	0	0
Clathrin-binding motifs, W-box	PWxxW	1	0.1111	1	0.1111	1	0.1111	1	0.0909	1	0.0909	1	0.0909	1	0.1	1	0.0833	1	0.1	1	0.1	1	0.0833	1	0.2	1	0.2	1	0.2	1	0.2	1	0.0909	1	0.125	1	0.125	1	0.125	1	0.1111	1	0.0909	1	0.1	1	0.1111	1	0.0909
Dynein binding motifs, protein transport, viruses transport inside the cell	[KR]xTQT	0	0	1	0.1111	0	0	0	0	0	0	0	0	0	0	0	0	0	0	0	0	0	0	0	0	0	0	0	0	0	0	0	0	0	0	0	0	0	0	0	0	0	0	0	0	1	0.1111	0	0
Enhance virion-release, anti-tetherin activity	DSGxxS	0	0	1	0.1111	0	0	0	0	0	0	0	0	2	0.2	1	0.0833	0	0	0	0	0	0	0	0	0	0	0	0	0	0	2	0.1818	0	0	1	0.125	1	0.125	1	0.1111	0	0	0	0	1	0.1111	1	0.0909
EPIYA-related motif, interactions between bacterial effectors and host SH2 domain-containing proteins	[ENT][HNPS][ILV]Y[ADEG]	2	0.2222	0	0	0	0	1	0.0909	1	0.0909	2	0.1818	0	0	1	0.0833	0	0	0	0	0	0	1	0.2	2	0.4	0	0	1	0.2	0	0	1	0.125	1	0.125	0	0	0	0	0	0	0	0	0	0	0	0
Glycosylation sites	N{P}[ST]{P}	7	0.7778	6	0.6667	7	0.7778	8	0.7273	7	0.6364	7	0.6364	9	0.9	7	0.5833	9	0.9	9	0.9	8	0.6667	5	1	5	1	5	1	5	1	9	0.8182	6	0.75	7	0.875	7	0.875	7	0.7778	8	0.7273	7	0.7	6	0.6667	9	0.8182
Helix-helix interactions	VxxxIxxLxxxL	0	0	0	0	1	0.1111	0	0	1	0.0909	1	0.0909	0	0	1	0.0833	0	0	0	0	2	0.1667	0	0	0	0	0	0	0	0	0	0	0	0	0	0	1	0.125	1	0.1111	2	0.1818	1	0.1	0	0	0	0
Helix-helix interactions	AxxxAxxxAxxxW	0	0	0	0	0	0	0	0	0	0	0	0	0	0	0	0	0	0	0	0	0	0	0	0	0	0	0	0	0	0	0	0	0	0	0	0	0	0	0	0	0	0	0	0	0	0	0	0
Heparan sulfate-binding motif, post-internalization of adenovirus infection	++x+	3	0.3333	5	0.5556	4	0.4444	3	0.2727	3	0.2727	2	0.1818	6	0.6	6	0.5	3	0.3	3	0.3	5	0.4167	3	0.6	3	0.6	3	0.6	3	0.6	6	0.5455	4	0.5	4	0.5	3	0.375	3	0.3333	6	0.5455	7	0.7	5	0.5556	2	0.1818
Heparan sulfate-binding motif, post-internalization of adenovirus infection	+++xx+	0	0	1	0.1111	1	0.1111	0	0	0	0	0	0	0	0	1	0.0833	0	0	0	0	1	0.0833	0	0	0	0	0	0	0	0	0	0	1	0.125	1	0.125	1	0.125	1	0.1111	1	0.0909	0	0	1	0.1111	1	0.0909
Induction of cellular-malignant transformation by Kaposin	LxxLL	4	0.4444	4	0.4444	4	0.4444	5	0.4545	5	0.4545	4	0.3636	5	0.5	4	0.3333	5	0.5	5	0.5	4	0.3333	4	0.8	4	0.8	4	0.8	4	0.8	6	0.5455	3	0.375	4	0.5	3	0.375	3	0.3333	5	0.4545	5	0.5	4	0.4444	3	0.2727
Interact with CASP4	xYxDx	3	0.3333	2	0.2222	4	0.4444	3	0.2727	3	0.2727	3	0.2727	4	0.4	5	0.4167	6	0.6	6	0.6	7	0.5833	2	0.4	2	0.4	2	0.4	2	0.4	4	0.3636	5	0.625	4	0.5	5	0.625	5	0.5556	5	0.4545	5	0.5	2	0.2222	5	0.4545
Interact with clathrin adaptor protein, anti-tethrin	PxxP	4	0.4444	6	0.6667	5	0.5556	4	0.3636	4	0.3636	4	0.3636	6	0.6	6	0.5	3	0.3	3	0.3	7	0.5833	3	0.6	3	0.6	3	0.6	3	0.6	7	0.6364	4	0.5	4	0.5	5	0.625	6	0.6667	6	0.5455	6	0.6	6	0.6667	5	0.4545
Interact with clathrin adaptor protein, anti-tethrin, and viral spread	YxYxx!	7	0.7778	4	0.4444	5	0.5556	7	0.6364	7	0.6364	6	0.5455	5	0.5	5	0.4167	4	0.4	4	0.4	5	0.4167	4	0.8	4	0.8	4	0.8	4	0.8	5	0.4545	6	0.75	5	0.625	4	0.5	4	0.4444	4	0.3636	5	0.5	4	0.4444	5	0.4545
Interact with clathrin adaptor protein, anti-tethrin, and viral spread	YxYxx[FILV]	4	0.4444	2	0.2222	2	0.2222	4	0.3636	4	0.3636	2	0.1818	2	0.2	2	0.1667	2	0.2	2	0.2	4	0.3333	2	0.4	2	0.4	3	0.6	2	0.4	2	0.1818	3	0.375	1	0.125	3	0.375	3	0.3333	2	0.1818	2	0.2	2	0.2222	2	0.1818
Interact with host SH3 domain	xx[PV]xxP	5	0.5556	9	1	6	0.6667	6	0.5455	6	0.5455	7	0.6364	8	0.8	11	0.9167	7	0.7	7	0.7	9	0.75	4	0.8	4	0.8	4	0.8	4	0.8	8	0.7273	5	0.625	7	0.875	6	0.75	7	0.7778	8	0.7273	7	0.7	9	1	7	0.6364
Interact with host SH3 domain	PxxPx[KR]	2	0.2222	1	0.1111	1	0.1111	2	0.1818	2	0.1818	2	0.1818	0	0	0	0	0	0	0	0	1	0.0833	2	0.4	2	0.4	2	0.4	2	0.4	1	0.0909	0	0	0	0	2	0.25	2	0.2222	0	0	0	0	1	0.1111	1	0.0909
Interact with host SH3 domain	[RKY]xxPxxP	0	0	2	0.2222	3	0.3333	0	0	0	0	0	0	1	0.1	2	0.1667	2	0.2	2	0.2	1	0.0833	0	0	0	0	0	0	0	0	1	0.0909	1	0.125	1	0.125	1	0.125	1	0.1111	1	0.0909	2	0.2	2	0.2222	1	0.0909
ISGylation, antiviral response	LRGG	0	0	0	0	0	0	0	0	0	0	0	0	0	0	0	0	0	0	0	0	0	0	0	0	0	0	0	0	0	0	0	0	0	0	0	0	0	0	0	0	0	0	0	0	0	0	0	0
ITAM motif, positive signal of immune receptors	Yxx[LI]x(6,8)Yxx[LI]	2	0.2222	1	0.1111	1	0.1111	2	0.1818	2	0.1818	1	0.0909	0	0	2	0.1667	1	0.1	1	0.1	2	0.1667	1	0.2	1	0.2	1	0.2	1	0.2	0	0	1	0.125	1	0.125	1	0.125	1	0.1111	2	0.1818	2	0.2	1	0.1111	1	0.0909
ITIM motif, negative signal of immune receptors	[SIVL]xYxx[IVL]	4	0.4444	2	0.2222	4	0.4444	4	0.3636	4	0.3636	6	0.5455	5	0.5	7	0.5833	4	0.4	4	0.4	6	0.5	3	0.6	3	0.6	3	0.6	3	0.6	5	0.4545	4	0.5	5	0.625	5	0.625	5	0.5556	6	0.5455	5	0.5	2	0.2222	5	0.4545
Lyase activity, catalyzes the removal of the phosphate group	[RK]xxxx!x!	8	0.8889	8	0.8889	9	1	9	0.8182	9	0.8182	8	0.7273	9	0.9	10	0.8333	10	1	10	1	11	0.9167	4	0.8	4	0.8	4	0.8	4	0.8	10	0.9091	8	1	8	1	8	1	9	1	11	1	10	1	8	0.8889	8	0.7273
Lyase activity, catalyzes the removal of the phosphate group	[RK]xxxx[FILV]x[FILV]	7	0.7778	6	0.6667	5	0.5556	8	0.7273	8	0.7273	8	0.7273	8	0.8	8	0.6667	8	0.8	8	0.8	9	0.75	4	0.8	4	0.8	4	0.8	4	0.8	8	0.7273	6	0.75	6	0.75	6	0.75	7	0.7778	8	0.7273	7	0.7	6	0.6667	5	0.4545
Mediate binding of endocytic protein NECAP-1 to a C-terminal of clathrin adaptor protein 2	WxxF	2	0.2222	4	0.4444	2	0.2222	2	0.1818	2	0.1818	2	0.1818	4	0.4	4	0.3333	4	0.4	4	0.4	4	0.3333	2	0.4	2	0.4	2	0.4	2	0.4	4	0.3636	4	0.5	4	0.5	2	0.25	2	0.2222	5	0.4545	3	0.3	4	0.4444	3	0.2727
NAD+ ADP-ribosyltransferase activity, ADP-ribosylation of Gs alpha, a GTP-binding regulatory protein	KDEL	0	0	0	0	1	0.1111	0	0	0	0	0	0	0	0	0	0	0	0	0	0	0	0	0	0	0	0	0	0	0	0	0	0	0	0	0	0	0	0	0	0	0	0	0	0	0	0	0	0
Necessary for endocytosis, interact with clathrin adaptor protein, intracellular trafficking, anti-tethrin	Yxx!	9	1	8	0.8889	9	1	11	1	11	1	10	0.9091	10	1	12	1	10	1	10	1	11	0.9167	5	1	5	1	5	1	5	1	10	0.9091	8	1	8	1	8	1	8	0.8889	10	0.9091	10	1	8	0.8889	11	1
Necessary for endocytosis, interact with clathrin adaptor protein, intracellular trafficking, anti-tethrin	Yxx[FILV]	9	1	7	0.7778	8	0.8889	11	1	11	1	10	0.9091	10	1	11	0.9167	8	0.8	8	0.8	11	0.9167	5	1	5	1	5	1	5	1	10	0.9091	7	0.875	7	0.875	8	1	8	0.8889	9	0.8182	9	0.9	7	0.7778	11	1
Nuclear localization sequence (NLS) motif	KRxR	1	0.1111	2	0.2222	1	0.1111	1	0.0909	1	0.0909	1	0.0909	2	0.2	2	0.1667	1	0.1	1	0.1	3	0.25	1	0.2	1	0.2	1	0.2	1	0.2	2	0.1818	1	0.125	1	0.125	1	0.125	1	0.1111	2	0.1818	2	0.2	2	0.2222	1	0.0909
Nuclear localization sequence (NLS) motif - Bipartite	KRx(10,12)K[KR][KR]	0	0	1	0.1111	0	0	0	0	0	0	0	0	1	0.1	0	0	0	0	0	0	0	0	0	0	0	0	0	0	0	0	1	0.0909	0	0	0	0	0	0	0	0	0	0	0	0	1	0.1111	0	0
Nuclear localization sequence (NLS) motif - Class 1	KR[KR]R	0	0	1	0.1111	0	0	0	0	0	0	0	0	0	0	0	0	0	0	0	0	0	0	0	0	0	0	0	0	0	0	0	0	0	0	0	0	0	0	0	0	0	0	0	0	1	0.1111	0	0
Nuclear localization sequence (NLS) motif - Class 4	[RP]xxKR[KR]{DE}	0	0	1	0.1111	0	0	0	0	0	0	0	0	1	0.1	1	0.0833	0	0	0	0	0	0	0	0	0	0	0	0	0	0	1	0.0909	0	0	0	0	0	0	0	0	0	0	0	0	1	0.1111	0	0
Pathogenesis, PDZ domain, C-terminl	[ST]x[VIL]	9	1	9	1	9	1	11	1	11	1	11	1	10	1	12	1	10	1	10	1	11	0.9167	5	1	5	1	5	1	5	1	11	1	8	1	8	1	8	1	9	1	11	1	10	1	9	1	8	0.7273
Pathogenesis, Required for efficient pedestal formation in host epithelial cells during infection	x(3)[FILV]x(3)[FILV]x(3)[FILV]x(5)	9	1	9	1	9	1	11	1	11	1	11	1	10	1	11	0.9167	10	1	10	1	11	0.9167	5	1	5	1	5	1	5	1	10	0.9091	8	1	8	1	8	1	9	1	10	0.9091	10	1	9	1	8	0.7273
Phosphoserine/threonine-binding proteins, regulation of signalling cascades	[RHK][STALV]x[ST]x[PESRDIFTQ]	5	0.5556	5	0.5556	7	0.7778	6	0.5455	6	0.5455	5	0.4545	6	0.6	7	0.5833	7	0.7	7	0.7	6	0.5	4	0.8	4	0.8	4	0.8	4	0.8	7	0.6364	5	0.625	5	0.625	5	0.625	6	0.6667	6	0.5455	6	0.6	5	0.5556	4	0.3636
Phosphoserine/threonine-binding proteins, regulation of signalling cascades	Rxx{P}[ST][IVLM]x	2	0.2222	3	0.3333	5	0.5556	3	0.2727	2	0.1818	3	0.2727	3	0.3	4	0.3333	3	0.3	3	0.3	5	0.4167	2	0.4	2	0.4	1	0.2	2	0.4	5	0.4545	3	0.375	3	0.375	2	0.25	3	0.3333	5	0.4545	4	0.4	3	0.3333	2	0.1818
Phosphoserine/threonine-binding proteins, regulation of signalling cascades	Rx{P}[ST]{P}P	0	0	2	0.2222	1	0.1111	0	0	0	0	0	0	1	0.1	0	0	1	0.1	1	0.1	1	0.0833	0	0	0	0	0	0	0	0	1	0.0909	1	0.125	0	0	0	0	1	0.1111	1	0.0909	2	0.2	2	0.2222	1	0.0909
Protein folding, Rossmann folds motifs, and bind FAD or NAD(P)	Gxxx[GA]	6	0.6667	6	0.6667	5	0.5556	7	0.6364	7	0.6364	7	0.6364	7	0.7	5	0.4167	8	0.8	8	0.8	9	0.75	4	0.8	4	0.8	4	0.8	4	0.8	7	0.6364	5	0.625	6	0.75	6	0.75	7	0.7778	9	0.8182	8	0.8	6	0.6667	6	0.5455
Protein folding, Rossmann folds motifs, and bind FAD or NAD(P)	GxxxG	5	0.5556	5	0.5556	5	0.5556	5	0.4545	5	0.4545	6	0.5455	6	0.6	5	0.4167	7	0.7	7	0.7	8	0.6667	4	0.8	4	0.8	4	0.8	4	0.8	6	0.5455	5	0.625	5	0.625	6	0.75	6	0.6667	7	0.6364	7	0.7	5	0.5556	5	0.4545
Protein folding, Rossmann folds motifs, and bind FAD or NAD(P)	Gx(1,2)GxxG	1	0.1111	1	0.1111	1	0.1111	1	0.0909	1	0.0909	1	0.0909	3	0.3	2	0.1667	1	0.1	1	0.1	2	0.1667	1	0.2	1	0.2	1	0.2	1	0.2	3	0.2727	1	0.125	1	0.125	1	0.125	1	0.1111	1	0.0909	2	0.2	1	0.1111	1	0.0909
Protein interaction, thiol-disulﬁde transfer	CxxxC	4	0.4444	3	0.3333	3	0.3333	3	0.2727	3	0.2727	4	0.3636	3	0.3	5	0.4167	3	0.3	3	0.3	4	0.3333	3	0.6	3	0.6	3	0.6	3	0.6	3	0.2727	4	0.5	3	0.375	3	0.375	3	0.3333	5	0.4545	5	0.5	3	0.3333	3	0.2727
Protein interaction, thiol-disulﬁde transfer, disulﬁde isomerization, virus fusion	CxxC	4	0.4444	4	0.4444	3	0.3333	4	0.3636	4	0.3636	4	0.3636	5	0.5	5	0.4167	4	0.4	4	0.4	4	0.3333	3	0.6	3	0.6	3	0.6	3	0.6	5	0.4545	4	0.5	3	0.375	3	0.375	3	0.3333	5	0.4545	4	0.4	4	0.4444	3	0.2727
Protein ubiquitylation, interaction with Nedd4 E3 ubiquitin ligases, recruit ESCRT pathway	PPxY	0	0	1	0.1111	1	0.1111	0	0	0	0	0	0	2	0.2	3	0.25	0	0	0	0	0	0	0	0	0	0	0	0	0	0	2	0.1818	0	0	0	0	0	0	0	0	0	0	0	0	1	0.1111	0	0
Proton transport, protein’s channel function, transmembrane domain, and viral replication	HxxxW	1	0.1111	1	0.1111	1	0.1111	1	0.0909	1	0.0909	1	0.0909	3	0.3	2	0.1667	1	0.1	1	0.1	0	0	2	0.4	1	0.2	1	0.2	1	0.2	3	0.2727	1	0.125	2	0.25	0	0	0	0	0	0	0	0	1	0.1111	0	0
Recruit ESCRT pathway, mediates viral budding and release	P[TS]AP	0	0	0	0	0	0	0	0	0	0	0	0	0	0	0	0	0	0	0	0	0	0	0	0	0	0	0	0	0	0	2	0.1818	0	0	0	0	0	0	0	0	0	0	0	0	0	0	0	0
Recruit ESCRT pathway, viral budding and release	YxxL	6	0.6667	6	0.6667	6	0.6667	6	0.5455	6	0.5455	5	0.4545	8	0.8	9	0.75	5	0.5	5	0.5	6	0.5	3	0.6	3	0.6	3	0.6	3	0.6	8	0.7273	6	0.75	5	0.625	5	0.625	5	0.5556	5	0.4545	6	0.6	6	0.6667	6	0.5455
Recruits ESCRT machinery, retroviruses release and replication	LYPxL	1	0.1111	1	0.1111	0	0	1	0.0909	1	0.0909	1	0.0909	0	0	1	0.0833	0	0	0	0	0	0	1	0.2	1	0.2	1	0.2	1	0.2	0	0	0	0	0	0	0	0	0	0	0	0	0	0	1	0.1111	0	0
Regulates endocytosis, endosome sorting, interact with host SH3 domain	RxxK	2	0.2222	6	0.6667	3	0.3333	3	0.2727	3	0.2727	4	0.3636	5	0.5	6	0.5	5	0.5	5	0.5	5	0.4167	3	0.6	3	0.6	3	0.6	3	0.6	6	0.5455	3	0.375	3	0.375	4	0.5	5	0.5556	4	0.3636	5	0.5	6	0.6667	4	0.3636
Regulation of APOBEC3 proteins	LGxGxxIxW	0	0	0	0	0	0	0	0	0	0	0	0	0	0	0	0	0	0	0	0	0	0	0	0	0	0	0	0	0	0	0	0	0	0	0	0	0	0	0	0	1	0.0909	2	0.2	0	0	1	0.0909
Regulation of APOBEC3 proteins	PPLP	0	0	0	0	0	0	0	0	0	0	0	0	1	0.1	0	0	0	0	0	0	0	0	0	0	0	0	0	0	0	0	1	0.0909	0	0	0	0	0	0	0	0	0	0	0	0	0	0	0	0
Regulation of APOBEC3 proteins	T[QDE]x(5)ADx(2)[IL]	0	0	0	0	0	0	0	0	0	0	0	0	0	0	0	0	0	0	0	0	0	0	0	0	0	0	0	0	0	0	0	0	0	0	0	0	0	0	0	0	0	0	0	0	0	0	0	0
Required for immediate early gene expression of cytomegalovirus	Rx[LC]	6	0.6667	6	0.6667	8	0.8889	8	0.7273	7	0.6364	5	0.4545	7	0.7	9	0.75	7	0.7	7	0.7	6	0.5	5	1	5	1	5	1	5	1	8	0.7273	6	0.75	5	0.625	5	0.625	6	0.6667	9	0.8182	7	0.7	6	0.6667	5	0.4545
Required for immediate early gene expression of cytomegalovirus	RxL!	4	0.4444	4	0.4444	5	0.5556	4	0.3636	4	0.3636	3	0.2727	4	0.4	5	0.4167	5	0.5	5	0.5	4	0.3333	3	0.6	3	0.6	3	0.6	3	0.6	4	0.3636	5	0.625	4	0.5	3	0.375	3	0.3333	9	0.8182	6	0.6	4	0.4444	4	0.3636
Required for immediate early gene expression of cytomegalovirus	RxLX!	3	0.3333	3	0.3333	5	0.5556	3	0.2727	4	0.3636	4	0.3636	3	0.3	6	0.5	6	0.6	6	0.6	6	0.5	3	0.6	3	0.6	3	0.6	3	0.6	4	0.3636	4	0.5	4	0.5	4	0.5	4	0.4444	8	0.7273	6	0.6	3	0.3333	4	0.3636
Required for immediate early gene expression of cytomegalovirus	RxL[FILV]	4	0.4444	4	0.4444	3	0.3333	3	0.2727	3	0.2727	3	0.2727	4	0.4	5	0.4167	4	0.4	4	0.4	4	0.3333	2	0.4	2	0.4	2	0.4	2	0.4	4	0.3636	3	0.375	3	0.375	3	0.375	3	0.3333	7	0.6364	6	0.6	4	0.4444	3	0.2727
Required for immediate early gene expression of cytomegalovirus	RxLX[FILV]	2	0.2222	1	0.1111	4	0.4444	2	0.1818	3	0.2727	2	0.1818	2	0.2	4	0.3333	4	0.4	4	0.4	4	0.3333	3	0.6	3	0.6	2	0.4	3	0.6	2	0.1818	2	0.25	3	0.375	2	0.25	3	0.3333	7	0.6364	5	0.5	1	0.1111	2	0.1818
Retroviruses fusogenic activities, syncytia and fusion	PHQ	0	0	0	0	0	0	0	0	0	0	0	0	0	0	1	0.0833	0	0	0	0	0	0	0	0	0	0	0	0	0	0	0	0	0	0	0	0	0	0	0	0	0	0	0	0	0	0	0	0
Sortases, adhesion protein, transpeptidase, virulence factors, fibrinogen-binding, cell wall anchoring	LPxTG	0	0	0	0	0	0	0	0	0	0	0	0	0	0	0	0	0	0	0	0	0	0	0	0	0	0	0	0	0	0	0	0	0	0	1	0.125	0	0	0	0	0	0	1	0.1	0	0	0	0
Sorting signal, and anti-tetherin	ExxxLV	1	0.1111	2	0.2222	2	0.2222	1	0.0909	1	0.0909	1	0.0909	3	0.3	3	0.25	2	0.2	2	0.2	1	0.0833	2	0.4	1	0.2	1	0.2	1	0.2	3	0.2727	2	0.25	2	0.25	0	0	1	0.1111	2	0.1818	3	0.3	2	0.2222	0	0
SUMOylation - SUMO binding to substrate	[VI]x[VI][VI]	5	0.5556	3	0.3333	6	0.6667	6	0.5455	5	0.4545	5	0.4545	6	0.6	5	0.4167	6	0.6	6	0.6	5	0.4167	2	0.4	2	0.4	2	0.4	2	0.4	6	0.5455	4	0.5	4	0.5	4	0.5	4	0.4444	6	0.5455	7	0.7	3	0.3333	4	0.3636
SUMOylation - SUMO binding to substrate	!Kx[DE]	4	0.4444	4	0.4444	6	0.6667	4	0.3636	4	0.3636	4	0.3636	5	0.5	5	0.4167	3	0.3	3	0.3	7	0.5833	3	0.6	3	0.6	3	0.6	3	0.6	5	0.4545	4	0.5	4	0.5	4	0.5	4	0.4444	6	0.5455	5	0.5	4	0.4444	4	0.3636
SUMOylation - SUMO binding to substrate	[FILV]Kx[DE]	4	0.4444	3	0.3333	6	0.6667	4	0.3636	4	0.3636	3	0.2727	3	0.3	5	0.4167	2	0.2	2	0.2	5	0.4167	3	0.6	3	0.6	3	0.6	3	0.6	3	0.2727	3	0.375	3	0.375	3	0.375	3	0.3333	5	0.4545	5	0.5	3	0.3333	3	0.2727
Viral attachment to cellular receptors	KGD	1	0.1111	1	0.1111	1	0.1111	1	0.0909	1	0.0909	1	0.0909	2	0.2	0	0	1	0.1	1	0.1	2	0.1667	1	0.2	1	0.2	2	0.4	1	0.2	2	0.1818	1	0.125	1	0.125	1	0.125	1	0.1111	1	0.0909	2	0.2	1	0.1111	1	0.0909
Viral attachment to cellular receptors	KGE	1	0.1111	0	0	0	0	1	0.0909	1	0.0909	0	0	0	0	2	0.1667	0	0	0	0	0	0	1	0.2	1	0.2	1	0.2	1	0.2	0	0	0	0	0	0	0	0	0	0	1	0.0909	0	0	0	0	1	0.0909
Viral pathogenesis, interact with cellular clathrin adaptor proteins, sorting signal	[DE]xxxL[LI]	5	0.5556	3	0.3333	6	0.6667	5	0.4545	5	0.4545	5	0.4545	5	0.5	4	0.3333	4	0.4	4	0.4	5	0.4167	5	1	5	1	5	1	5	1	5	0.4545	4	0.5	4	0.5	3	0.375	4	0.4444	5	0.4545	4	0.4	3	0.3333	4	0.3636
Walker A motif, ATP-binding motifs	[AG]xxxxGK[ST]	1	0.1111	1	0.1111	1	0.1111	1	0.0909	1	0.0909	1	0.0909	1	0.1	1	0.0833	1	0.1	1	0.1	1	0.0833	1	0.2	1	0.2	1	0.2	1	0.2	1	0.0909	1	0.125	1	0.125	1	0.125	1	0.1111	1	0.0909	1	0.1	1	0.1111	1	0.0909
Walker B motif - ATP-binding motifs	!!!!D	5	0.5556	6	0.6667	5	0.5556	5	0.4545	5	0.4545	6	0.5455	9	0.9	10	0.8333	7	0.7	7	0.7	9	0.75	3	0.6	3	0.6	3	0.6	3	0.6	10	0.9091	4	0.5	5	0.625	7	0.875	8	0.8889	7	0.6364	8	0.8	6	0.6667	8	0.7273
Walker B motif - ATP-binding motifs	[FILV][FILV][FILV][FILV]D	2	0.2222	2	0.2222	2	0.2222	2	0.1818	2	0.1818	2	0.1818	2	0.2	3	0.25	2	0.2	2	0.2	2	0.1667	2	0.4	2	0.4	2	0.4	2	0.4	2	0.1818	1	0.125	2	0.25	1	0.125	1	0.1111	2	0.1818	2	0.2	2	0.2222	1	0.0909
Walker B motif - ATP-binding motifs	!!!DxxP	1	0.1111	1	0.1111	1	0.1111	1	0.0909	1	0.0909	1	0.0909	2	0.2	3	0.25	2	0.2	2	0.2	4	0.3333	1	0.2	1	0.2	1	0.2	1	0.2	2	0.1818	2	0.25	2	0.25	2	0.25	2	0.2222	2	0.1818	3	0.3	1	0.1111	2	0.1818
Walker B motif - ATP-binding motifs	[FILV][FILV][FILV]DxxP	1	0.1111	1	0.1111	0	0	1	0.0909	1	0.0909	1	0.0909	1	0.1	0	0	1	0.1	1	0.1	1	0.0833	1	0.2	1	0.2	1	0.2	1	0.2	1	0.0909	1	0.125	1	0.125	1	0.125	1	0.1111	2	0.1818	2	0.2	1	0.1111	1	0.0909
[truncated: 18 more columns]

## Sheet: SARS-CoV-2
Motif	Number of protein	Name of the proteins	Position: Sequence	Number of instance of the motif
Cx(13,20)Cx(5,6)Cx(9,19)Cx(10,14)Cx(4,14)C	0
KLGxGLxF[DN]	0
KxGGLxF[DN]	0
KRAR	0
KxGFFKR	0
SVSVGMKPSPRP	0
L[FL][VI]F[VIL]LE[LF]LLxF	0
LxCxE	0
!PxV	3
		lcl|NC_045512.2_prot_YP_009724389.1_1 [gene=orf1ab] [locus_tag=GU280_gp01] [db_xref=GeneID:43740578] [protein=orf1ab polyprotein] [exception=ribosomal slippage] [protein_id=YP_009724389.1] [location=join(266..13468,13468..21555)] [gbkey=CDS]	'108: VPHV'; '776: APLV'; '1119: GPNV'; '1658: YPQV'; '2885: LPRV'; '3014: LPGV'; '3101: LPGV'; '3446: GPFV'; '4222: GPKV'; '4485: CPAV'; '4623: VPVV'; '4719: GPLV'; '4730: VPFV'; '6518: VPEV';	14
		lcl|NC_045512.2_prot_YP_009725295.1_2 [gene=orf1ab] [locus_tag=GU280_gp01] [db_xref=GeneID:43740578] [protein=orf1a polyprotein] [protein_id=YP_009725295.1] [location=266..13483] [gbkey=CDS]	'108: VPHV'; '776: APLV'; '1119: GPNV'; '1658: YPQV'; '2885: LPRV'; '3014: LPGV'; '3101: LPGV'; '3446: GPFV'; '4222: GPKV';	9
		lcl|NC_045512.2_prot_YP_009724390.1_3 [gene=S] [locus_tag=GU280_gp02] [db_xref=GeneID:43740568] [protein=surface glycoprotein] [protein_id=YP_009724390.1] [location=21563..25384] [gbkey=CDS]	'8: LPLV';	1
[FILV]PxV	3
		lcl|NC_045512.2_prot_YP_009724389.1_1 [gene=orf1ab] [locus_tag=GU280_gp01] [db_xref=GeneID:43740578] [protein=orf1ab polyprotein] [exception=ribosomal slippage] [protein_id=YP_009724389.1] [location=join(266..13468,13468..21555)] [gbkey=CDS]	'108: VPHV'; '2885: LPRV'; '3014: LPGV'; '3101: LPGV'; '4623: VPVV'; '4730: VPFV'; '6518: VPEV';	7
		lcl|NC_045512.2_prot_YP_009725295.1_2 [gene=orf1ab] [locus_tag=GU280_gp01] [db_xref=GeneID:43740578] [protein=orf1a polyprotein] [protein_id=YP_009725295.1] [location=266..13483] [gbkey=CDS]	'108: VPHV'; '2885: LPRV'; '3014: LPGV'; '3101: LPGV';	4
		lcl|NC_045512.2_prot_YP_009724390.1_3 [gene=S] [locus_tag=GU280_gp02] [db_xref=GeneID:43740568] [protein=surface glycoprotein] [protein_id=YP_009724390.1] [location=21563..25384] [gbkey=CDS]	'8: LPLV';	1
DGE	2
		lcl|NC_045512.2_prot_YP_009724389.1_1 [gene=orf1ab] [locus_tag=GU280_gp01] [db_xref=GeneID:43740578] [protein=orf1ab polyprotein] [exception=ribosomal slippage] [protein_id=YP_009724389.1] [location=join(266..13468,13468..21555)] [gbkey=CDS]	'1547: DGE';	1
		lcl|NC_045512.2_prot_YP_009725295.1_2 [gene=orf1ab] [locus_tag=GU280_gp01] [db_xref=GeneID:43740578] [protein=orf1a polyprotein] [protein_id=YP_009725295.1] [location=266..13483] [gbkey=CDS]	'1547: DGE';	1
DLxxL	3
		lcl|NC_045512.2_prot_YP_009724389.1_1 [gene=orf1ab] [locus_tag=GU280_gp01] [db_xref=GeneID:43740578] [protein=orf1ab polyprotein] [exception=ribosomal slippage] [protein_id=YP_009724389.1] [location=join(266..13468,13468..21555)] [gbkey=CDS]	'762: DLQPL'; '1940: DLNQL'; '4187: DLQDL'; '6977: DLYKL';	4
		lcl|NC_045512.2_prot_YP_009725295.1_2 [gene=orf1ab] [locus_tag=GU280_gp01] [db_xref=GeneID:43740578] [protein=orf1a polyprotein] [protein_id=YP_009725295.1] [location=266..13483] [gbkey=CDS]	'762: DLQPL'; '1940: DLNQL'; '4187: DLQDL';	3
		lcl|NC_045512.2_prot_YP_009724390.1_3 [gene=S] [locus_tag=GU280_gp02] [db_xref=GeneID:43740568] [protein=surface glycoprotein] [protein_id=YP_009724390.1] [location=21563..25384] [gbkey=CDS]	'1199: DLQEL';	1
IDA	3
		lcl|NC_045512.2_prot_YP_009724389.1_1 [gene=orf1ab] [locus_tag=GU280_gp01] [db_xref=GeneID:43740578] [protein=orf1ab polyprotein] [exception=ribosomal slippage] [protein_id=YP_009724389.1] [location=join(266..13468,13468..21555)] [gbkey=CDS]	'581: IDA'; '3835: IDA'; '5256: IDA';	3
		lcl|NC_045512.2_prot_YP_009725295.1_2 [gene=orf1ab] [locus_tag=GU280_gp01] [db_xref=GeneID:43740578] [protein=orf1a polyprotein] [protein_id=YP_009725295.1] [location=266..13483] [gbkey=CDS]	'581: IDA'; '3835: IDA';	2
		lcl|NC_045512.2_prot_YP_009724397.2_11 [gene=N] [locus_tag=GU280_gp10] [db_xref=GeneID:43740575] [protein=nucleocapsid phosphoprotein] [protein_id=YP_009724397.2] [location=28274..29533] [gbkey=CDS]	'357: IDA';	1
LDI	3
		lcl|NC_045512.2_prot_YP_009724389.1_1 [gene=orf1ab] [locus_tag=GU280_gp01] [db_xref=GeneID:43740578] [protein=orf1ab polyprotein] [exception=ribosomal slippage] [protein_id=YP_009724389.1] [location=join(266..13468,13468..21555)] [gbkey=CDS]	'3041: LDI';	1
		lcl|NC_045512.2_prot_YP_009725295.1_2 [gene=orf1ab] [locus_tag=GU280_gp01] [db_xref=GeneID:43740578] [protein=orf1a polyprotein] [protein_id=YP_009725295.1] [location=266..13483] [gbkey=CDS]	'3041: LDI';	1
		lcl|NC_045512.2_prot_YP_009724390.1_3 [gene=S] [locus_tag=GU280_gp02] [db_xref=GeneID:43740568] [protein=surface glycoprotein] [protein_id=YP_009724390.1] [location=21563..25384] [gbkey=CDS]	'585: LDI';	1
LDV	0
RGD	3
		lcl|NC_045512.2_prot_YP_009724389.1_1 [gene=orf1ab] [locus_tag=GU280_gp01] [db_xref=GeneID:43740578] [protein=orf1ab polyprotein] [exception=ribosomal slippage] [protein_id=YP_009724389.1] [location=join(266..13468,13468..21555)] [gbkey=CDS]	'1530: RGD';	1
		lcl|NC_045512.2_prot_YP_009725295.1_2 [gene=orf1ab] [locus_tag=GU280_gp01] [db_xref=GeneID:43740578] [protein=orf1a polyprotein] [protein_id=YP_009725295.1] [location=266..13483] [gbkey=CDS]	'1530: RGD';	1
		lcl|NC_045512.2_prot_YP_009724390.1_3 [gene=S] [locus_tag=GU280_gp02] [db_xref=GeneID:43740568] [protein=surface glycoprotein] [protein_id=YP_009724390.1] [location=21563..25384] [gbkey=CDS]	'403: RGD';	1
RGDLxxL	0
SDI	2
		lcl|NC_045512.2_prot_YP_009724389.1_1 [gene=orf1ab] [locus_tag=GU280_gp01] [db_xref=GeneID:43740578] [protein=orf1ab polyprotein] [exception=ribosomal slippage] [protein_id=YP_009724389.1] [location=join(266..13468,13468..21555)] [gbkey=CDS]	'1272: SDI'; '2661: SDI'; '6386: SDI';	3
		lcl|NC_045512.2_prot_YP_009725295.1_2 [gene=orf1ab] [locus_tag=GU280_gp01] [db_xref=GeneID:43740578] [protein=orf1a polyprotein] [protein_id=YP_009725295.1] [location=266..13483] [gbkey=CDS]	'1272: SDI'; '2661: SDI';	2
YGL	0
RxLR	0
[LI]xCx[DE]	3
		lcl|NC_045512.2_prot_YP_009724389.1_1 [gene=orf1ab] [locus_tag=GU280_gp01] [db_xref=GeneID:43740578] [protein=orf1ab polyprotein] [exception=ribosomal slippage] [protein_id=YP_009724389.1] [location=join(266..13468,13468..21555)] [gbkey=CDS]	'1845: LYCID'; '2039: LACED'; '6783: LWCKD';	3
		lcl|NC_045512.2_prot_YP_009725295.1_2 [gene=orf1ab] [locus_tag=GU280_gp01] [db_xref=GeneID:43740578] [protein=orf1a polyprotein] [protein_id=YP_009725295.1] [location=266..13483] [gbkey=CDS]	'1845: LYCID'; '2039: LACED';	2
		lcl|NC_045512.2_prot_YP_009724396.1_10 [gene=ORF8] [locus_tag=GU280_gp09] [db_xref=GeneID:43740577] [protein=ORF8 protein] [protein_id=YP_009724396.1] [location=27894..28259] [gbkey=CDS]	'88: INCQE';	1
Cx(5)Cx(1,)Hx(6)C	2
		lcl|NC_045512.2_prot_YP_009724389.1_1 [gene=orf1ab] [locus_tag=GU280_gp01] [db_xref=GeneID:43740578] [protein=orf1ab polyprotein] [exception=ribosomal slippage] [protein_id=YP_009724389.1] [location=join(266..13468,13468..21555)] [gbkey=CDS]	'2282: CTGSIPCSVCLSGLDSLDTYPSLETIQITISSFKWDLTAFGLVAEWFLAYILFTRFFYVLGLAAIMQLFFSYFAVHFISNSWLMWLIINLVQMAPISAMVRMYIFFASFYYVWKSYVHVVDGCNSSTCMMCYKRNRATRVECTTIVNGVRRSFYVYANGGKGFCKLHNWNCVNCDTFCAGSTFISDEVARDLSLQFKRPINPTDQSSYIVDSVTVKNGSIHLYFDKAGQKTYERHSLSHFVNLDNLRANNTKGSLPINVIVFDGKSKCEESSAKSASVYYSQLMCQPILLLDQALVSDVGDSAEVAVKMFDAYVNTFSSTFNVPMEKLKTLVATAEAELAKNVSLDNVLSTFISAARQGFVDSDVETKDVVECLKLSHQSDIEVTGDSCNNY…	1
		lcl|NC_045512.2_prot_YP_009725295.1_2 [gene=orf1ab] [locus_tag=GU280_gp01] [db_xref=GeneID:43740578] [protein=orf1a polyprotein] [protein_id=YP_009725295.1] [location=266..13483] [gbkey=CDS]	'2282: CTGSIPCSVCLSGLDSLDTYPSLETIQITISSFKWDLTAFGLVAEWFLAYILFTRFFYVLGLAAIMQLFFSYFAVHFISNSWLMWLIINLVQMAPISAMVRMYIFFASFYYVWKSYVHVVDGCNSSTCMMCYKRNRATRVECTTIVNGVRRSFYVYANGGKGFCKLHNWNCVNCDTFCAGSTFISDEVARDLSLQFKRPINPTDQSSYIVDSVTVKNGSIHLYFDKAGQKTYERHSLSHFVNLDNLRANNTKGSLPINVIVFDGKSKCEESSAKSASVYYSQLMCQPILLLDQALVSDVGDSAEVAVKMFDAYVNTFSSTFNVPMEKLKTLVATAEAELAKNVSLDNVLSTFISAARQGFVDSDVETKDVVECLKLSHQSDIEVTGDSCNNY…	1
!x!xxxx!	12
		lcl|NC_045512.2_prot_YP_009724389.1_1 [gene=orf1ab] [locus_tag=GU280_gp01] [db_xref=GeneID:43740578] [protein=orf1ab polyprotein] [exception=ribosomal slippage] [protein_id=YP_009724389.1] [location=join(266..13468,13468..21555)] [gbkey=CDS]	'14: VQLSLPVL'; '28: VRGFGDSV'; '49: GTCGLVEV'; '60: VLPQLEQP'; '69: VFIKRSDA'; '82: GHVMVELV'; '90: AELEGIQY'; '104: LGVLVPHV'; '114: IPVAYRKV'; '130: GAGGHSYG'; '138: ADLKSFDL'; '179: GGAYTRYV'; '190: FCGPDGYP'; '198: LECIKDLL'; '206: ARAGKASC'; '266: FNGECPNF'; '274: VFPLNSII'; '286: PRVEKKKL'; '296: FMGRIRSV'; '305: PVASPNEC'; '334: GDFVKATC'; '357: CGYLPQNA'; '366: VKIYCPAC'; '378: VGPEHSLA'…	507
		lcl|NC_045512.2_prot_YP_009725295.1_2 [gene=orf1ab] [locus_tag=GU280_gp01] [db_xref=GeneID:43740578] [protein=orf1a polyprotein] [protein_id=YP_009725295.1] [location=266..13483] [gbkey=CDS]	'14: VQLSLPVL'; '28: VRGFGDSV'; '49: GTCGLVEV'; '60: VLPQLEQP'; '69: VFIKRSDA'; '82: GHVMVELV'; '90: AELEGIQY'; '104: LGVLVPHV'; '114: IPVAYRKV'; '130: GAGGHSYG'; '138: ADLKSFDL'; '179: GGAYTRYV'; '190: FCGPDGYP'; '198: LECIKDLL'; '206: ARAGKASC'; '266: FNGECPNF'; '274: VFPLNSII'; '286: PRVEKKKL'; '296: FMGRIRSV'; '305: PVASPNEC'; '334: GDFVKATC'; '357: CGYLPQNA'; '366: VKIYCPAC'; '378: VGPEHSLA'…	313
		lcl|NC_045512.2_prot_YP_009724390.1_3 [gene=S] [locus_tag=GU280_gp02] [db_xref=GeneID:43740568] [protein=surface glycoprotein] [protein_id=YP_009724390.1] [location=21563..25384] [gbkey=CDS]	'1: MFVFLVLL'; '9: PLVSSQCV'; '25: PPAYTNSF'; '35: GVYYPDKV'; '55: FLPFFSNV'; '65: FHAIHVSG'; '82: PVLPFNDG'; '103: GWIFGTTL'; '126: VVIKVCEF'; '168: FEYVSQPF'; '177: MDLEGKQG'; '192: FVFKNIDG'; '210: INLVRDLP'; '220: FSALEPLV'; '231: IGINITRF'; '241: LLALHRSY'; '258: WTAGAAAY'; '268: GYLQPRTF'; '289: VDCALDPL'; '301: CTLKSFTV'; '311: GIYQTSNF'; '320: VQPTESIV'; '330: PNITNLCP'; '351: YAWNRKRI'; …	94
		lcl|NC_045512.2_prot_YP_009724391.1_4 [gene=ORF3a] [locus_tag=GU280_gp03] [db_xref=GeneID:43740569] [protein=ORF3a protein] [protein_id=YP_009724391.1] [location=25393..26220] [gbkey=CDS]	'1: MDLFMRIF'; '11: GTVTLKQG'; '29: VRATATIP'; '37: IQASLPFG'; '45: WLIVGVAL'; '69: WQLALSKG'; '77: VHFVCNLL'; '88: VTVYSHLL'; '96: LVAAGLEA'; '104: PFLYLYAL'; '113: YFLQSINF'; '121: VRIIMRLW'; '131: WKCRSKNP'; '139: LLYDANYF'; '147: LCWHTNCY'; '156: YCIPYNSV'; '167: IVITSGDG'; '186: IGGYTEKW'; '200: CVVLHSYF'; '212: YQLYSTQL'; '230: FFIYNKIV'; '244: VQIHTIDG'; '256: VNPVMEPI';	23
		lcl|NC_045512.2_prot_YP_009724392.1_5 [gene=E] [locus_tag=GU280_gp04] [db_xref=GeneID:43740570] [protein=envelope protein] [protein_id=YP_009724392.1] [location=26245..26472] [gbkey=CDS]	'10: GTLIVNSV'; '18: LLFLAFVV'; '26: FLLVTLAI'; '34: LTALRLCA'; '42: YCCNIVNV'; '52: VKPSFYVY';	6
		lcl|NC_045512.2_prot_YP_009724393.1_6 [gene=M] [locus_tag=GU280_gp05] [db_xref=GeneID:43740571] [protein=membrane glycoprotein] [protein_id=YP_009724393.1] [location=26523..27191] [gbkey=CDS]	'6: GTITVEEL'; '20: WNLVIGFL'; '31: WICLLQFA'; '45: FLYIIKLI'; '53: FLWLLWPV'; '62: LACFVLAA'; '71: YRINWITG'; '79: GIAIAMAC'; '88: VGLMWLSY'; '96: FIASFRLF'; '112: FNPETNIL'; '122: VPLHGTIL'; '132: PLLESELV'; '140: IGAVILRG'; '149: LRIAGHHL'; '157: GRCDIKDL'; '176: LSYYKLGA'; '187: VAGDSGFA'; '199: YRIGNYKL';	19
		lcl|NC_045512.2_prot_YP_009724394.1_7 [gene=ORF6] [locus_tag=GU280_gp06] [db_xref=GeneID:43740572] [protein=ORF6 protein] [protein_id=YP_009724394.1] [location=27202..27387] [gbkey=CDS]	'2: FHLVDFQV'; '12: AEILLIIM'; '22: FKVSIWNL'; '33: INLIIKNL';	4
		lcl|NC_045512.2_prot_YP_009724395.1_8 [gene=ORF7a] [locus_tag=GU280_gp07] [db_xref=GeneID:43740573] [protein=ORF7a protein] [protein_id=YP_009724395.1] [location=27394..27759] [gbkey=CDS]	'1: MKIILFLA'; '10: ITLATCEL'; '24: VRGTTVLL'; '38: GTYEGNSP'; '48: PLADNKFA'; '56: LTCFSTQF'; '64: AFACPDGV'; '75: YQLRARSV'; '86: LFIRQEEV'; '97: YSPIFLIV'; '105: AAIVFITL';	11
		lcl|NC_045512.2_prot_YP_009725318.1_9 [gene=ORF7b] [locus_tag=GU280_gp08] [db_xref=GeneID:43740574] [protein=ORF7b] [protein_id=YP_009725318.1] [location=27756..27887] [gbkey=CDS]	'2: IELSLIDF'; '10: YLCFLAFL'; '18: LFLVLIML'; '27: IFWFSLEL';	4
		lcl|NC_045512.2_prot_YP_009724396.1_10 [gene=ORF8] [locus_tag=GU280_gp09] [db_xref=GeneID:43740577] [protein=ORF8 protein] [protein_id=YP_009724396.1] [location=27894..28259] [gbkey=CDS]	'1: MKFLVFLG'; '13: VAAFHQEC'; '30: PYVVDDPC'; '39: IHFYSKWY'; '49: VGARKSAP'; '58: IELCVDEA'; '74: IDIGNYTV'; '83: CLPFTINC'; '93: PKLGSLVV'; '102: CSFYEDFL'; '114: VRVVLDFI';	11
		lcl|NC_045512.2_prot_YP_009724397.2_11 [gene=N] [locus_tag=GU280_gp10] [db_xref=GeneID:43740575] [protein=nucleocapsid phosphoprotein] [protein_id=YP_009724397.2] [location=28274..29533] [gbkey=CDS]	'13: PRITFGGP'; '53: FTALTQHG'; '64: LKFPRGQG'; '94: IRGGDGKM'; '104: LSPRWYFY'; '112: YLGTGPEA'; '122: PYGANKDG'; '130: IIWVATEG'; '155: AAIVLQLP'; '168: PKGFYAEG'; '208: ARMAGNGG'; '217: AALALLLL'; '236: GKGQQQQG'; '268: YNVTQAFG'; '284: GNFGDQEL'; '302: PQIAQFAP'; '313: AFFGMSRI'; '324: VTPSGTWL'; '337: IKLDDKDP'; '350: VILLNKHI'; '396: PAADLDDF';	21
		lcl|NC_045512.2_prot_YP_009725255.1_12 [gene=ORF10] [locus_tag=GU280_gp11] [db_xref=GeneID:43740576] [protein=ORF10 protein] [protein_id=YP_009725255.1] [location=29558..29674] [gbkey=CDS]	'1: MGYINVFA'; '9: FPFTIYSL'; '19: CRMNSRNY'; '28: AQVDVVNF';	4
!x!xxxx!xx!	12
		lcl|NC_045512.2_prot_YP_009724389.1_1 [gene=orf1ab] [locus_tag=GU280_gp01] [db_xref=GeneID:43740578] [protein=orf1ab polyprotein] [exception=ribosomal slippage] [protein_id=YP_009724389.1] [location=join(266..13468,13468..21555)] [gbkey=CDS]	'16: LSLPVLQVRDV'; '28: VRGFGDSVEEV'; '49: GTCGLVEVEKG'; '60: VLPQLEQPYVF'; '82: GHVMVELVAEL'; '104: LGVLVPHVGEI'; '130: GAGGHSYGADL'; '143: FDLGDELGTDP'; '190: FCGPDGYPLEC'; '266: FNGECPNFVFP'; '286: PRVEKKKLDGF'; '305: PVASPNECNQM'; '334: GDFVKATCEFC'; '358: GYLPQNAVVKI'; '404: IAFGGCVFSYV'; '422: YWVPRASANIG'; '467: FKLNEEIAIIL'; '486: AFVETVKGLDY'; '509: FKVTKGKAKKG'; '530: LSPLYAFASEA'; '559…	299
		lcl|NC_045512.2_prot_YP_009725295.1_2 [gene=orf1ab] [locus_tag=GU280_gp01] [db_xref=GeneID:43740578] [protein=orf1a polyprotein] [protein_id=YP_009725295.1] [location=266..13483] [gbkey=CDS]	'16: LSLPVLQVRDV'; '28: VRGFGDSVEEV'; '49: GTCGLVEVEKG'; '60: VLPQLEQPYVF'; '82: GHVMVELVAEL'; '104: LGVLVPHVGEI'; '130: GAGGHSYGADL'; '143: FDLGDELGTDP'; '190: FCGPDGYPLEC'; '266: FNGECPNFVFP'; '286: PRVEKKKLDGF'; '305: PVASPNECNQM'; '334: GDFVKATCEFC'; '358: GYLPQNAVVKI'; '404: IAFGGCVFSYV'; '422: YWVPRASANIG'; '467: FKLNEEIAIIL'; '486: AFVETVKGLDY'; '509: FKVTKGKAKKG'; '530: LSPLYAFASEA'; '559…	183
		lcl|NC_045512.2_prot_YP_009724390.1_3 [gene=S] [locus_tag=GU280_gp02] [db_xref=GeneID:43740568] [protein=surface glycoprotein] [protein_id=YP_009724390.1] [location=21563..25384] [gbkey=CDS]	'1: MFVFLVLLPLV'; '25: PPAYTNSFTRG'; '55: FLPFFSNVTWF'; '82: PVLPFNDGVYF'; '126: VVIKVCEFQFC'; '174: PFLMDLEGKQG'; '210: INLVRDLPQGF'; '223: LEPLVDLPIGI'; '241: LLALHRSYLTP'; '258: WTAGAAAYYVG'; '301: CTLKSFTVEKG'; '320: VQPTESIVRFP'; '337: PFGEVFNATRF'; '351: YAWNRKRISNC'; '367: VLYNSASFSTF'; '380: YGVSPTKLNDL'; '400: FVIRGDEVRQI'; '411: APGQTGKIADY'; '445: VGGNYNYLYRL'; '473: YQAGSTPCNGV'; '489…	53
		lcl|NC_045512.2_prot_YP_009724391.1_4 [gene=ORF3a] [locus_tag=GU280_gp03] [db_xref=GeneID:43740569] [protein=ORF3a protein] [protein_id=YP_009724391.1] [location=25393..26220] [gbkey=CDS]	'1: MDLFMRIFTIG'; '13: VTLKQGEIKDA'; '29: VRATATIPIQA'; '41: LPFGWLIVGVA'; '52: LLAVFQSASKI'; '69: WQLALSKGVHF'; '81: CNLLLLFVTVY'; '94: LLLVAAGLEAP'; '105: FLYLYALVYFL'; '118: INFVRIIMRLW'; '131: WKCRSKNPLLY'; '146: FLCWHTNCYDY'; '186: IGGYTEKWESG'; '230: FFIYNKIVDEP'; '244: VQIHTIDGSSG';	15
		lcl|NC_045512.2_prot_YP_009724392.1_5 [gene=E] [locus_tag=GU280_gp04] [db_xref=GeneID:43740570] [protein=envelope protein] [protein_id=YP_009724392.1] [location=26245..26472] [gbkey=CDS]	'10: GTLIVNSVLLF'; '21: LAFVVFLLVTL'; '32: AILTALRLCAY'; '44: CNIVNVSLVKP';	4
		lcl|NC_045512.2_prot_YP_009724393.1_6 [gene=M] [locus_tag=GU280_gp05] [db_xref=GeneID:43740571] [protein=membrane glycoprotein] [protein_id=YP_009724393.1] [location=26523..27191] [gbkey=CDS]	'6: GTITVEELKKL'; '22: LVIGFLFLTWI'; '38: AYANRNRFLYI'; '49: IKLIFLWLLWP'; '60: VTLACFVLAAV'; '71: YRINWITGGIA'; '82: IAMACLVGLMW'; '93: LSYFIASFRLF'; '112: FNPETNILLNV'; '132: PLLESELVIGA'; '149: LRIAGHHLGRC'; '192: GFAAYSRYRIG';	12
		lcl|NC_045512.2_prot_YP_009724394.1_7 [gene=ORF6] [locus_tag=GU280_gp06] [db_xref=GeneID:43740572] [protein=ORF6 protein] [protein_id=YP_009724394.1] [location=27202..27387] [gbkey=CDS]	'2: FHLVDFQVTIA'; '17: IIMRTFKVSIW';	2
		lcl|NC_045512.2_prot_YP_009724395.1_8 [gene=ORF7a] [locus_tag=GU280_gp07] [db_xref=GeneID:43740573] [protein=ORF7a protein] [protein_id=YP_009724395.1] [location=27394..27759] [gbkey=CDS]	'3: IILFLALITLA'; '24: VRGTTVLLKEP'; '38: GTYEGNSPFHP'; '56: LTCFSTQFAFA'; '77: LRARSVSPKLF'; '97: YSPIFLIVAAI';	6
		lcl|NC_045512.2_prot_YP_009725318.1_9 [gene=ORF7b] [locus_tag=GU280_gp08] [db_xref=GeneID:43740574] [protein=ORF7b] [protein_id=YP_009725318.1] [location=27756..27887] [gbkey=CDS]	'2: IELSLIDFYLC'; '13: FLAFLLFLVLI';	2
		lcl|NC_045512.2_prot_YP_009724396.1_10 [gene=ORF8] [locus_tag=GU280_gp09] [db_xref=GeneID:43740577] [protein=ORF8 protein] [protein_id=YP_009724396.1] [location=27894..28259] [gbkey=CDS]	'3: FLVFLGIITTV'; '31: YVVDDPCPIHF'; '55: APLIELCVDEA'; '74: IDIGNYTVSCL'; '86: FTINCQEPKLG'; '98: LVVRCSFYEDF';	6
		lcl|NC_045512.2_prot_YP_009724397.2_11 [gene=N] [locus_tag=GU280_gp10] [db_xref=GeneID:43740575] [protein=nucleocapsid phosphoprotein] [protein_id=YP_009724397.2] [location=28274..29533] [gbkey=CDS]	'64: LKFPRGQGVPI'; '94: IRGGDGKMKDL'; '106: PRWYFYYLGTG'; '122: PYGANKDGIIW'; '157: IVLQLPQGTTL'; '168: PKGFYAEGSRG'; '208: ARMAGNGGDAA'; '220: ALLLLDRLNQL'; '236: GKGQQQQGQTV'; '268: YNVTQAFGRRG'; '307: FAPSASAFFGM'; '326: PSGTWLTYTGA'; '350: VILLNKHIDAY';	13
		lcl|NC_045512.2_prot_YP_009725255.1_12 [gene=ORF10] [locus_tag=GU280_gp11] [db_xref=GeneID:43740576] [protein=ORF10 protein] [protein_id=YP_009725255.1] [location=29558..29674] [gbkey=CDS]	'1: MGYINVFAFPF';	1
!xxxx!xx!	12
		lcl|NC_045512.2_prot_YP_009724389.1_1 [gene=orf1ab] [locus_tag=GU280_gp01] [db_xref=GeneID:43740578] [protein=orf1ab polyprotein] [exception=ribosomal slippage] [protein_id=YP_009724389.1] [location=join(266..13468,13468..21555)] [gbkey=CDS]	'18: LPVLQVRDV'; '27: LVRGFGDSV'; '46: LKDGTCGLV'; '56: VEKGVLPQL'; '71: IKRSDARTA'; '80: PHGHVMVEL'; '89: VAELEGIQY'; '101: GETLGVLVP'; '122: LLRKNGNKG'; '132: GGHSYGADL'; '145: LGDELGTDP'; '169: VTRELMREL'; '185: YVDNNFCGP'; '196: YPLECIKDL'; '222: IDTKRGVYC'; '249: YELQTPFEI'; '263: FDTFNGECP'; '276: PLNSIIKTI'; '288: VEKKKLDGF'; '298: GRIRSVYPV'; '307: ASPNECNQM'; '326: CGETSWQTG'; '336: FVKA…	492
		lcl|NC_045512.2_prot_YP_009725295.1_2 [gene=orf1ab] [locus_tag=GU280_gp01] [db_xref=GeneID:43740578] [protein=orf1a polyprotein] [protein_id=YP_009725295.1] [location=266..13483] [gbkey=CDS]	'18: LPVLQVRDV'; '27: LVRGFGDSV'; '46: LKDGTCGLV'; '56: VEKGVLPQL'; '71: IKRSDARTA'; '80: PHGHVMVEL'; '89: VAELEGIQY'; '101: GETLGVLVP'; '122: LLRKNGNKG'; '132: GGHSYGADL'; '145: LGDELGTDP'; '169: VTRELMREL'; '185: YVDNNFCGP'; '196: YPLECIKDL'; '222: IDTKRGVYC'; '249: YELQTPFEI'; '263: FDTFNGECP'; '276: PLNSIIKTI'; '288: VEKKKLDGF'; '298: GRIRSVYPV'; '307: ASPNECNQM'; '326: CGETSWQTG'; '336: FVKA…	299
		lcl|NC_045512.2_prot_YP_009724390.1_3 [gene=S] [locus_tag=GU280_gp02] [db_xref=GeneID:43740568] [protein=surface glycoprotein] [protein_id=YP_009724390.1] [location=21563..25384] [gbkey=CDS]	'1: MFVFLVLLP'; '10: LVSSQCVNL'; '27: AYTNSFTRG'; '54: LFLPFFSNV'; '67: AIHVSGTNG'; '84: LPFNDGVYF'; '118: LIVNNATNV'; '128: IKVCEFQFC'; '152: WMESEFRVY'; '163: ANNCTFEYV'; '176: LMDLEGKQG'; '189: LREFVFKNI'; '204: YSKHTPINL'; '217: PQGFSALEP'; '227: VDLPIGINI'; '243: ALHRSYLTP'; '252: GDSSSGWTA'; '261: GAAAYYVGY'; '283: GTITDAVDC'; '303: LKSFTVEKG'; '322: PTESIVRFP'; '336: CPFGEVFNA'; '353: WNRK…	81
		lcl|NC_045512.2_prot_YP_009724391.1_4 [gene=ORF3a] [locus_tag=GU280_gp03] [db_xref=GeneID:43740569] [protein=ORF3a protein] [protein_id=YP_009724391.1] [location=25393..26220] [gbkey=CDS]	'3: LFMRIFTIG'; '15: LKQGEIKDA'; '28: FVRATATIP'; '37: IQASLPFGW'; '46: LIVGVALLA'; '71: LALSKGVHF'; '80: VCNLLLLFV'; '90: VYSHLLLVA'; '99: AGLEAPFLY'; '110: ALVYFLQSI'; '120: FVRIIMRLW'; '133: CRSKNPLLY'; '148: CWHTNCYDY'; '179: ISEHDYQIG'; '188: GYTEKWESG'; '206: YFTSDYYQL'; '225: VEHVTFFIY'; '246: IHTIDGSSG'; '255: VVNPVMEPI';	19
		lcl|NC_045512.2_prot_YP_009724392.1_5 [gene=E] [locus_tag=GU280_gp04] [db_xref=GeneID:43740570] [protein=envelope protein] [protein_id=YP_009724392.1] [location=26245..26472] [gbkey=CDS]	'5: VSEETGTLI'; '14: VNSVLLFLA'; '23: FVVFLLVTL'; '32: AILTALRLC'; '41: AYCCNIVNV'; '51: LVKPSFYVY'; '65: LNSSRVPDL';	7
		lcl|NC_045512.2_prot_YP_009724393.1_6 [gene=M] [locus_tag=GU280_gp05] [db_xref=GeneID:43740571] [protein=membrane glycoprotein] [protein_id=YP_009724393.1] [location=26523..27191] [gbkey=CDS]	'8: ITVEELKKL'; '17: LEQWNLVIG'; '26: FLFLTWICL'; '40: ANRNRFLYI'; '49: IKLIFLWLL'; '58: WPVTLACFV'; '68: AAVYRINWI'; '78: GGIAIAMAC'; '87: LVGLMWLSY'; '104: ARTRSMWSF'; '114: PETNILLNV'; '124: LHGTILTRP'; '133: LLESELVIG'; '144: ILRGHLRIA'; '156: LGRCDIKDL'; '171: ATSRTLSYY'; '187: VAGDSGFAA'; '196: YSRYRIGNY';	18
		lcl|NC_045512.2_prot_YP_009724394.1_7 [gene=ORF6] [locus_tag=GU280_gp06] [db_xref=GeneID:43740572] [protein=ORF6 protein] [protein_id=YP_009724394.1] [location=27202..27387] [gbkey=CDS]	'4: LVDFQVTIA'; '14: ILLIIMRTF'; '24: VSIWNLDYI'; '44: LTENKYSQL';	4
		lcl|NC_045512.2_prot_YP_009724395.1_8 [gene=ORF7a] [locus_tag=GU280_gp07] [db_xref=GeneID:43740573] [protein=ORF7a protein] [protein_id=YP_009724395.1] [location=27394..27759] [gbkey=CDS]	'1: MKIILFLAL'; '10: ITLATCELY'; '26: GTTVLLKEP'; '40: YEGNSPFHP'; '50: ADNKFALTC'; '59: FSTQFAFAC'; '74: VYQLRARSV'; '88: IRQEEVQEL'; '97: YSPIFLIVA'; '108: VFITLCFTL';	10
		lcl|NC_045512.2_prot_YP_009725318.1_9 [gene=ORF7b] [locus_tag=GU280_gp08] [db_xref=GeneID:43740574] [protein=ORF7b] [protein_id=YP_009725318.1] [location=27756..27887] [gbkey=CDS]	'1: MIELSLIDF'; '10: YLCFLAFLL'; '19: FLVLIMLII';	3
		lcl|NC_045512.2_prot_YP_009724396.1_10 [gene=ORF8] [locus_tag=GU280_gp09] [db_xref=GeneID:43740577] [protein=ORF8 protein] [protein_id=YP_009724396.1] [location=27894..28259] [gbkey=CDS]	'1: MKFLVFLGI'; '25: CTQHQPYVV'; '37: CPIHFYSKW'; '50: GARKSAPLI'; '65: AGSKSPIQY'; '76: IGNYTVSCL'; '85: PFTINCQEP'; '100: VRCSFYEDF'; '109: LEYHDVRVV';	9
		lcl|NC_045512.2_prot_YP_009724397.2_11 [gene=N] [locus_tag=GU280_gp10] [db_xref=GeneID:43740575] [protein=nucleocapsid phosphoprotein] [protein_id=YP_009724397.2] [location=28274..29533] [gbkey=CDS]	'12: APRITFGGP'; '45: LPNNTASWF'; '64: LKFPRGQGV'; '96: GGDGKMKDL'; '106: PRWYFYYLG'; '116: GPEAGLPYG'; '125: ANKDGIIWV'; '134: ATEGALNTP'; '147: GTRNPANNA'; '156: AIVLQLPQG'; '167: LPKGFYAEG'; '199: PGSSRGTSP'; '210: MAGNGGDAA'; '219: LALLLLDRL'; '238: GQQQQGQTV'; '270: VTQAFGRRG'; '279: PEQTQGNFG'; '308: APSASAFFG'; '328: GTWLTYTGA'; '352: LLNKHIDAY'; '392: VTLLPAADL';	21
		lcl|NC_045512.2_prot_YP_009725255.1_12 [gene=ORF10] [locus_tag=GU280_gp11] [db_xref=GeneID:43740576] [protein=ORF10 protein] [protein_id=YP_009725255.1] [location=29558..29674] [gbkey=CDS]	'1: MGYINVFAF'; '11: FTIYSLLLC'; '27: IAQVDVVNF';	3
[FILV]x[FILV]xxxx[FILV]	12
		lcl|NC_045512.2_prot_YP_009724389.1_1 [gene=orf1ab] [locus_tag=GU280_gp01] [db_xref=GeneID:43740578] [protein=orf1ab polyprotein] [exception=ribosomal slippage] [protein_id=YP_009724389.1] [location=join(266..13468,13468..21555)] [gbkey=CDS]	'14: VQLSLPVL'; '54: VEVEKGVL'; '104: LGVLVPHV'; '114: IPVAYRKV'; '273: FVFPLNSI'; '404: IAFGGCVF'; '473: IAIILASF'; '606: VQLTSQWL'; '679: FKLVNKFL'; '693: IIIGGAKL'; '703: LNLGETFV'; '740: IFLEGETL'; '756: VVLKTGDL'; '783: VCINGLML'; '823: VTFGDDTV'; '1038: VYIKNADI'; '1056: VVVNAANV'; '1097: LKVGGSCV'; '1115: LHVVGPNV'; '1162: LRVCVDTV'; '1175: LAVFDKNL'; '1353: FYILPSII'; '1391: VCVETKAI'; '1…	112
		lcl|NC_045512.2_prot_YP_009725295.1_2 [gene=orf1ab] [locus_tag=GU280_gp01] [db_xref=GeneID:43740578] [protein=orf1a polyprotein] [protein_id=YP_009725295.1] [location=266..13483] [gbkey=CDS]	'14: VQLSLPVL'; '54: VEVEKGVL'; '104: LGVLVPHV'; '114: IPVAYRKV'; '273: FVFPLNSI'; '404: IAFGGCVF'; '473: IAIILASF'; '606: VQLTSQWL'; '679: FKLVNKFL'; '693: IIIGGAKL'; '703: LNLGETFV'; '740: IFLEGETL'; '756: VVLKTGDL'; '783: VCINGLML'; '823: VTFGDDTV'; '1038: VYIKNADI'; '1056: VVVNAANV'; '1097: LKVGGSCV'; '1115: LHVVGPNV'; '1162: LRVCVDTV'; '1175: LAVFDKNL'; '1353: FYILPSII'; '1391: VCVETKAI'; '1…	70
		lcl|NC_045512.2_prot_YP_009724390.1_3 [gene=S] [locus_tag=GU280_gp02] [db_xref=GeneID:43740568] [protein=surface glycoprotein] [protein_id=YP_009724390.1] [location=21563..25384] [gbkey=CDS]	'3: VFLVLLPL'; '126: VVIKVCEF'; '231: IGINITRF'; '242: LALHRSYL'; '400: FVIRGDEV'; '490: FPLQSYGF'; '510: VVVLSFEL'; '539: VNFNFNGL'; '585: LDITPCSF'; '608: VAVLYQDV'; '622: VAIHADQL'; '720: ISVTTEIL'; '752: LLLQYGSF'; '821: LLFNKVTL'; '858: LTVLPPLL'; '909: IGVTQNVL'; '1061: VFLHVTYV'; '1130: IGIVNNTV'; '1218: LGFIAGLI';	19
		lcl|NC_045512.2_prot_YP_009724391.1_4 [gene=ORF3a] [locus_tag=GU280_gp03] [db_xref=GeneID:43740569] [protein=ORF3a protein] [protein_id=YP_009724391.1] [location=25393..26220] [gbkey=CDS]	'8: FTIGTVTL'; '41: LPFGWLIV'; '77: VHFVCNLL'; '88: VTVYSHLL'; '230: FFIYNKIV';	5
		lcl|NC_045512.2_prot_YP_009724392.1_5 [gene=E] [locus_tag=GU280_gp04] [db_xref=GeneID:43740570] [protein=envelope protein] [protein_id=YP_009724392.1] [location=26245..26472] [gbkey=CDS]	'12: LIVNSVLL'; '21: LAFVVFLL'; '49: VSLVKPSF';	3
		lcl|NC_045512.2_prot_YP_009724393.1_6 [gene=M] [locus_tag=GU280_gp05] [db_xref=GeneID:43740571] [protein=membrane glycoprotein] [protein_id=YP_009724393.1] [location=26523..27191] [gbkey=CDS]	'22: LVIGFLFL'; '46: LYIIKLIF'; '60: VTLACFVL'; '80: IAIAMACL'; '122: VPLHGTIL'; '138: LVIGAVIL'; '149: LRIAGHHL';	7
		lcl|NC_045512.2_prot_YP_009724394.1_7 [gene=ORF6] [locus_tag=GU280_gp06] [db_xref=GeneID:43740572] [protein=ORF6 protein] [protein_id=YP_009724394.1] [location=27202..27387] [gbkey=CDS]	'2: FHLVDFQV'; '15: LLIIMRTF'; '33: INLIIKNL';	3
		lcl|NC_045512.2_prot_YP_009724395.1_8 [gene=ORF7a] [locus_tag=GU280_gp07] [db_xref=GeneID:43740573] [protein=ORF7a protein] [protein_id=YP_009724395.1] [location=27394..27759] [gbkey=CDS]	'3: IILFLALI'; '86: LFIRQEEV'; '100: IFLIVAAI';	3
		lcl|NC_045512.2_prot_YP_009725318.1_9 [gene=ORF7b] [locus_tag=GU280_gp08] [db_xref=GeneID:43740574] [protein=ORF7b] [protein_id=YP_009725318.1] [location=27756..27887] [gbkey=CDS]	'2: IELSLIDF'; '11: LCFLAFLL'; '19: FLVLIMLI';	3
		lcl|NC_045512.2_prot_YP_009724396.1_10 [gene=ORF8] [locus_tag=GU280_gp09] [db_xref=GeneID:43740577] [protein=ORF8 protein] [protein_id=YP_009724396.1] [location=27894..28259] [gbkey=CDS]	'3: FLVFLGII'; '74: IDIGNYTV'; '114: VRVVLDFI';	3
		lcl|NC_045512.2_prot_YP_009724397.2_11 [gene=N] [locus_tag=GU280_gp10] [db_xref=GeneID:43740575] [protein=nucleocapsid phosphoprotein] [protein_id=YP_009724397.2] [location=28274..29533] [gbkey=CDS]	'350: VILLNKHI';	1
		lcl|NC_045512.2_prot_YP_009725255.1_12 [gene=ORF10] [locus_tag=GU280_gp11] [db_xref=GeneID:43740576] [protein=ORF10 protein] [protein_id=YP_009725255.1] [location=29558..29674] [gbkey=CDS]	'4: INVFAFPF'; '30: VDVVNFNL';	2
[FILV]x[FILV]xxxx[FILV]xx[FILV]	10
		lcl|NC_045512.2_prot_YP_009724389.1_1 [gene=orf1ab] [locus_tag=GU280_gp01] [db_xref=GeneID:43740578] [protein=orf1ab polyprotein] [exception=ribosomal slippage] [protein_id=YP_009724389.1] [location=join(266..13468,13468..21555)] [gbkey=CDS]	'16: LSLPVLQVRDV'; '54: VEVEKGVLPQL'; '104: LGVLVPHVGEI'; '404: IAFGGCVFSYV'; '606: VQLTSQWLTNI'; '693: IIIGGAKLKAL'; '756: VVLKTGDLQPL'; '783: VCINGLMLLEI'; '823: VTFGDDTVIEV'; '2233: FLLLSVCLGSL'; '2349: LFFSYFAVHFI'; '2570: LLLDQALVSDV'; '2602: FNVPMEKLKTL'; '2776: VTLVFLFVAAI'; '2882: LHFLPRVFSAV'; '3024: VNLLTNMFTPL'; '3084: LFLMSFTVLCL'; '3138: FWITIAYIICI'; '3165: VVFNGVSFSTF'; '3191: LKLR…	34
		lcl|NC_045512.2_prot_YP_009725295.1_2 [gene=orf1ab] [locus_tag=GU280_gp01] [db_xref=GeneID:43740578] [protein=orf1a polyprotein] [protein_id=YP_009725295.1] [location=266..13483] [gbkey=CDS]	'16: LSLPVLQVRDV'; '54: VEVEKGVLPQL'; '104: LGVLVPHVGEI'; '404: IAFGGCVFSYV'; '606: VQLTSQWLTNI'; '693: IIIGGAKLKAL'; '756: VVLKTGDLQPL'; '783: VCINGLMLLEI'; '823: VTFGDDTVIEV'; '2233: FLLLSVCLGSL'; '2349: LFFSYFAVHFI'; '2570: LLLDQALVSDV'; '2602: FNVPMEKLKTL'; '2776: VTLVFLFVAAI'; '2882: LHFLPRVFSAV'; '3024: VNLLTNMFTPL'; '3084: LFLMSFTVLCL'; '3138: FWITIAYIICI'; '3165: VVFNGVSFSTF'; '3191: LKLR…	24
		lcl|NC_045512.2_prot_YP_009724390.1_3 [gene=S] [locus_tag=GU280_gp02] [db_xref=GeneID:43740568] [protein=surface glycoprotein] [protein_id=YP_009724390.1] [location=21563..25384] [gbkey=CDS]	'133: FQFCNDPFLGV'; '231: IGINITRFQTL'; '400: FVIRGDEVRQI'; '585: LDITPCSFGGV'; '1218: LGFIAGLIAIV';	5
		lcl|NC_045512.2_prot_YP_009724391.1_4 [gene=ORF3a] [locus_tag=GU280_gp03] [db_xref=GeneID:43740569] [protein=ORF3a protein] [protein_id=YP_009724391.1] [location=25393..26220] [gbkey=CDS]	'46: LIVGVALLAVF'; '77: VHFVCNLLLLF';	2
		lcl|NC_045512.2_prot_YP_009724392.1_5 [gene=E] [locus_tag=GU280_gp04] [db_xref=GeneID:43740570] [protein=envelope protein] [protein_id=YP_009724392.1] [location=26245..26472] [gbkey=CDS]	'17: VLLFLAFVVFL';	1
		lcl|NC_045512.2_prot_YP_009724393.1_6 [gene=M] [locus_tag=GU280_gp05] [db_xref=GeneID:43740571] [protein=membrane glycoprotein] [protein_id=YP_009724393.1] [location=26523..27191] [gbkey=CDS]	'22: LVIGFLFLTWI'; '46: LYIIKLIFLWL'; '60: VTLACFVLAAV'; '80: IAIAMACLVGL';	4
		lcl|NC_045512.2_prot_YP_009724394.1_7 [gene=ORF6] [locus_tag=GU280_gp06] [db_xref=GeneID:43740572] [protein=ORF6 protein] [protein_id=YP_009724394.1] [location=27202..27387] [gbkey=CDS]	'7: FQVTIAEILLI'; '22: FKVSIWNLDYI';	2
		lcl|NC_045512.2_prot_YP_009724395.1_8 [gene=ORF7a] [locus_tag=GU280_gp07] [db_xref=GeneID:43740573] [protein=ORF7a protein] [protein_id=YP_009724395.1] [location=27394..27759] [gbkey=CDS]	'86: LFIRQEEVQEL'; '100: IFLIVAAIVFI';	2
		lcl|NC_045512.2_prot_YP_009725318.1_9 [gene=ORF7b] [locus_tag=GU280_gp08] [db_xref=GeneID:43740574] [protein=ORF7b] [protein_id=YP_009725318.1] [location=27756..27887] [gbkey=CDS]	'4: LSLIDFYLCFL'; '16: FLLFLVLIMLI';	2
		lcl|NC_045512.2_prot_YP_009724396.1_10 [gene=ORF8] [locus_tag=GU280_gp09] [db_xref=GeneID:43740577] [protein=ORF8 protein] [protein_id=YP_009724396.1] [location=27894..28259] [gbkey=CDS]	'3: FLVFLGIITTV'; '74: IDIGNYTVSCL';	2
[FILV]xxxx[FILV]xx[FILV]	12
		lcl|NC_045512.2_prot_YP_009724389.1_1 [gene=orf1ab] [locus_tag=GU280_gp01] [db_xref=GeneID:43740578] [protein=orf1ab polyprotein] [exception=ribosomal slippage] [protein_id=YP_009724389.1] [location=join(266..13468,13468..21555)] [gbkey=CDS]	'18: LPVLQVRDV'; '56: VEKGVLPQL'; '84: VMVELVAEL'; '106: VLVPHVGEI'; '288: VEKKKLDGF'; '360: LPQNAVVKI'; '406: FGGCVFSYV'; '446: LNDNLLEIL'; '459: VNINIVGDF'; '494: LDYKAFKQI'; '562: LQKAAITIL'; '573: ISQYSLRLI'; '608: LTSQWLTNI'; '695: IGGAKLKAL'; '758: LKTGDLQPL'; '783: VCINGLMLL'; '825: FGDDTVIEV'; '875: VADAVIKTL'; '1020: VQTIEVNSF'; '1110: LAKHCLHVV'; '1154: FGADPIHSL'; '1182: LYDKLVSSF'; '1…	112
		lcl|NC_045512.2_prot_YP_009725295.1_2 [gene=orf1ab] [locus_tag=GU280_gp01] [db_xref=GeneID:43740578] [protein=orf1a polyprotein] [protein_id=YP_009725295.1] [location=266..13483] [gbkey=CDS]	'18: LPVLQVRDV'; '56: VEKGVLPQL'; '84: VMVELVAEL'; '106: VLVPHVGEI'; '288: VEKKKLDGF'; '360: LPQNAVVKI'; '406: FGGCVFSYV'; '446: LNDNLLEIL'; '459: VNINIVGDF'; '494: LDYKAFKQI'; '562: LQKAAITIL'; '573: ISQYSLRLI'; '608: LTSQWLTNI'; '695: IGGAKLKAL'; '758: LKTGDLQPL'; '783: VCINGLMLL'; '825: FGDDTVIEV'; '875: VADAVIKTL'; '1020: VQTIEVNSF'; '1110: LAKHCLHVV'; '1154: FGADPIHSL'; '1182: LYDKLVSSF'; '1…	73
		lcl|NC_045512.2_prot_YP_009724390.1_3 [gene=S] [locus_tag=GU280_gp02] [db_xref=GeneID:43740568] [protein=surface glycoprotein] [protein_id=YP_009724390.1] [location=21563..25384] [gbkey=CDS]	'2: FVFLVLLPL'; '54: LFLPFFSNV'; '135: FCNDPFLGV'; '171: VSQPFLMDL'; '189: LREFVFKNI'; '233: INITRFQTL'; '327: VRFPNITNL'; '342: FNATRFASV'; '382: VSPTKLNDL'; '402: IRGDEVRQI'; '456: FRKSNLKPF'; '510: VVVLSFELL'; '587: ITPCSFGGV'; '797: FGGFNFSQI'; '818: IEDLLFNKV'; '850: ICAQKFNGL'; '976: VLNDILSRL'; '996: LITGRLQSL'; '1060: VVFLHVTYV'; '1164: VDLGDISGI'; '1216: IWLGFIAGL';	21
		lcl|NC_045512.2_prot_YP_009724391.1_4 [gene=ORF3a] [locus_tag=GU280_gp03] [db_xref=GeneID:43740569] [protein=ORF3a protein] [protein_id=YP_009724391.1] [location=25393..26220] [gbkey=CDS]	'47: IVGVALLAV'; '79: FVCNLLLLF'; '106: LYLYALVYF'; '115: LQSINFVRI';	4
		lcl|NC_045512.2_prot_YP_009724392.1_5 [gene=E] [locus_tag=GU280_gp04] [db_xref=GeneID:43740570] [protein=envelope protein] [protein_id=YP_009724392.1] [location=26245..26472] [gbkey=CDS]	'12: LIVNSVLLF'; '21: LAFVVFLLV'; '65: LNSSRVPDL';	3
		lcl|NC_045512.2_prot_YP_009724393.1_6 [gene=M] [locus_tag=GU280_gp05] [db_xref=GeneID:43740571] [protein=membrane glycoprotein] [protein_id=YP_009724393.1] [location=26523..27191] [gbkey=CDS]	'8: ITVEELKKL'; '24: IGFLFLTWI'; '46: LYIIKLIFL'; '57: LWPVTLACF'; '82: IAMACLVGL'; '156: LGRCDIKDL';	6
		lcl|NC_045512.2_prot_YP_009724394.1_7 [gene=ORF6] [locus_tag=GU280_gp06] [db_xref=GeneID:43740572] [protein=ORF6 protein] [protein_id=YP_009724394.1] [location=27202..27387] [gbkey=CDS]	'9: VTIAEILLI'; '24: VSIWNLDYI';	2
		lcl|NC_045512.2_prot_YP_009724395.1_8 [gene=ORF7a] [locus_tag=GU280_gp07] [db_xref=GeneID:43740573] [protein=ORF7a protein] [protein_id=YP_009724395.1] [location=27394..27759] [gbkey=CDS]	'4: ILFLALITL'; '88: IRQEEVQEL'; '102: LIVAAIVFI';	3
		lcl|NC_045512.2_prot_YP_009725318.1_9 [gene=ORF7b] [locus_tag=GU280_gp08] [db_xref=GeneID:43740574] [protein=ORF7b] [protein_id=YP_009725318.1] [location=27756..27887] [gbkey=CDS]	'6: LIDFYLCFL'; '17: LLFLVLIML';	2
		lcl|NC_045512.2_prot_YP_009724396.1_10 [gene=ORF8] [locus_tag=GU280_gp09] [db_xref=GeneID:43740577] [protein=ORF8 protein] [protein_id=YP_009724396.1] [location=27894..28259] [gbkey=CDS]	'5: VFLGIITTV'; '76: IGNYTVSCL'; '109: LEYHDVRVV';	3
		lcl|NC_045512.2_prot_YP_009724397.2_11 [gene=N] [locus_tag=GU280_gp10] [db_xref=GeneID:43740575] [protein=nucleocapsid phosphoprotein] [protein_id=YP_009724397.2] [location=28274..29533] [gbkey=CDS]	'219: LALLLLDRL'; '395: LPAADLDDF';	2
		lcl|NC_045512.2_prot_YP_009725255.1_12 [gene=ORF10] [locus_tag=GU280_gp11] [db_xref=GeneID:43740576] [protein=ORF10 protein] [protein_id=YP_009725255.1] [location=29558..29674] [gbkey=CDS]	'27: IAQVDVVNF';	1
W[ST]xCxVTCG	0
L!x![DE]	6
		lcl|NC_045512.2_prot_YP_009724389.1_1 [gene=orf1ab] [locus_tag=GU280_gp01] [db_xref=GeneID:43740578] [protein=orf1ab polyprotein] [exception=ribosomal slippage] [protein_id=YP_009724389.1] [location=join(266..13468,13468..21555)] [gbkey=CDS]	'53: LVEVE'; '61: LPQLE'; '320: LMKCD'; '788: LMLLE'; '1175: LAVFD'; '1254: LLYID'; '1379: LAHAE'; '1845: LYCID'; '3808: LGVYD'; '4662: LLKYD'; '4862: LFVVE'; '5006: LMGWD'; '5221: LPYPD'; '5456: LFAAE'; '6336: LPGCD';	15
		lcl|NC_045512.2_prot_YP_009725295.1_2 [gene=orf1ab] [locus_tag=GU280_gp01] [db_xref=GeneID:43740578] [protein=orf1a polyprotein] [protein_id=YP_009725295.1] [location=266..13483] [gbkey=CDS]	'53: LVEVE'; '61: LPQLE'; '320: LMKCD'; '788: LMLLE'; '1175: LAVFD'; '1254: LLYID'; '1379: LAHAE'; '1845: LYCID'; '3808: LGVYD';	9
		lcl|NC_045512.2_prot_YP_009724390.1_3 [gene=S] [locus_tag=GU280_gp02] [db_xref=GeneID:43740568] [protein=surface glycoprotein] [protein_id=YP_009724390.1] [location=21563..25384] [gbkey=CDS]	'176: LMDLE'; '650: LIGAE'; '1203: LGKYE';	3
		lcl|NC_045512.2_prot_YP_009724393.1_6 [gene=M] [locus_tag=GU280_gp05] [db_xref=GeneID:43740571] [protein=membrane glycoprotein] [protein_id=YP_009724393.1] [location=26523..27191] [gbkey=CDS]	'156: LGRCD';	1
		lcl|NC_045512.2_prot_YP_009724395.1_8 [gene=ORF7a] [locus_tag=GU280_gp07] [db_xref=GeneID:43740573] [protein=ORF7a protein] [protein_id=YP_009724395.1] [location=27394..27759] [gbkey=CDS]	'12: LATCE';	1
		lcl|NC_045512.2_prot_YP_009724397.2_11 [gene=N] [locus_tag=GU280_gp10] [db_xref=GeneID:43740575] [protein=nucleocapsid phosphoprotein] [protein_id=YP_009724397.2] [location=28274..29533] [gbkey=CDS]	'221: LLLLD'; '395: LPAAD';	2
L[FILV]x[FILV][DE]	3
		lcl|NC_045512.2_prot_YP_009724389.1_1 [gene=orf1ab] [locus_tag=GU280_gp01] [db_xref=GeneID:43740578] [protein=orf1ab polyprotein] [exception=ribosomal slippage] [protein_id=YP_009724389.1] [location=join(266..13468,13468..21555)] [gbkey=CDS]	'53: LVEVE'; '1254: LLYID'; '4862: LFVVE';	3
		lcl|NC_045512.2_prot_YP_009725295.1_2 [gene=orf1ab] [locus_tag=GU280_gp01] [db_xref=GeneID:43740578] [protein=orf1a polyprotein] [protein_id=YP_009725295.1] [location=266..13483] [gbkey=CDS]	'53: LVEVE'; '1254: LLYID';	2
		lcl|NC_045512.2_prot_YP_009724397.2_11 [gene=N] [locus_tag=GU280_gp10] [db_xref=GeneID:43740575] [protein=nucleocapsid phosphoprotein] [protein_id=YP_009724397.2] [location=28274..29533] [gbkey=CDS]	'221: LLLLD';	1
L[LI][DEN][LF][DE]	0
PWxxW	1
		lcl|NC_045512.2_prot_YP_009724390.1_3 [gene=S] [locus_tag=GU280_gp02] [db_xref=GeneID:43740568] [protein=surface glycoprotein] [protein_id=YP_009724390.1] [location=21563..25384] [gbkey=CDS]	'1213: PWYIW';	1
[GE][KR]Q[GE]RL	0
[RK]RQ[RK]RF	0
[LM]VxSxVxA	0
KKKRGLF	0
[QE][ST]RGLF	0
KSS[RG]LF	0
RSS[RG]LF	0
[KR]xTQT	0
G[IV]QVD	0
DSGxxS	0
[ENT][HNPS][ILV]Y[ADEG]	2
		lcl|NC_045512.2_prot_YP_009724390.1_3 [gene=S] [locus_tag=GU280_gp02] [db_xref=GeneID:43740568] [protein=surface glycoprotein] [protein_id=YP_009724390.1] [location=21563..25384] [gbkey=CDS]	'393: TNVYA';	1
		lcl|NC_045512.2_prot_YP_009724391.1_4 [gene=ORF3a] [locus_tag=GU280_gp03] [db_xref=GeneID:43740569] [protein=ORF3a protein] [protein_id=YP_009724391.1] [location=25393..26220] [gbkey=CDS]	'261: EPIYD';	1
EDLY	0
EHIYD	0
EHLYA	0
ENIYE	0
EPIYA	0
EPIYG	0
EPLYA	0
EPVYA	0
ESIYE	0
NPLYE	0
TPLYA	0
RxLx[EQD]	3
		lcl|NC_045512.2_prot_YP_009724389.1_1 [gene=orf1ab] [locus_tag=GU280_gp01] [db_xref=GeneID:43740578] [protein=orf1ab polyprotein] [exception=ribosomal slippage] [protein_id=YP_009724389.1] [location=join(266..13468,13468..21555)] [gbkey=CDS]	'5281: RKLHD'; '5903: RDLYD'; '6650: RNLQE'; '6817: RMLLE';	4
		lcl|NC_045512.2_prot_YP_009724390.1_3 [gene=S] [locus_tag=GU280_gp02] [db_xref=GeneID:43740568] [protein=surface glycoprotein] [protein_id=YP_009724390.1] [location=21563..25384] [gbkey=CDS]	'214: RDLPQ';	1
		lcl|NC_045512.2_prot_YP_009724393.1_6 [gene=M] [locus_tag=GU280_gp05] [db_xref=GeneID:43740571] [protein=membrane glycoprotein] [protein_id=YP_009724393.1] [location=26523..27191] [gbkey=CDS]	'131: RPLLE';	1
N{P}[ST]{P}	9
		lcl|NC_045512.2_prot_YP_009724389.1_1 [gene=orf1ab] [locus_tag=GU280_gp01] [db_xref=GeneID:43740578] [protein=orf1ab polyprotein] [exception=ribosomal slippage] [protein_id=YP_009724389.1] [location=join(266..13468,13468..21555)] [gbkey=CDS]	'348: NLTK'; '389: NESG'; '434: NHTG'; '810: NNTF'; '840: NITF'; '997: NQTT'; '1442: NETL'; '1651: NHTK'; '1719: NKTV'; '1922: NASF'; '1996: NATN'; '2081: NNSL'; '2102: NSSL'; '2222: NFSK'; '2272: NSTN'; '2405: NSST'; '2498: NGSI'; '2530: NNTK'; '2623: NVSL'; '3396: NFTI'; '3405: NGSC'; '3743: NYSG'; '4173: NTTK'; '4256: NATE'; '4263: NSTV'; '5159: NSTY'; '5303: NTSR'; '5426: NVTD'; '5581: NISD';…	38
		lcl|NC_045512.2_prot_YP_009725295.1_2 [gene=orf1ab] [locus_tag=GU280_gp01] [db_xref=GeneID:43740578] [protein=orf1a polyprotein] [protein_id=YP_009725295.1] [location=266..13483] [gbkey=CDS]	'348: NLTK'; '389: NESG'; '434: NHTG'; '810: NNTF'; '840: NITF'; '997: NQTT'; '1442: NETL'; '1651: NHTK'; '1719: NKTV'; '1922: NASF'; '1996: NATN'; '2081: NNSL'; '2102: NSSL'; '2222: NFSK'; '2272: NSTN'; '2405: NSST'; '2498: NGSI'; '2530: NNTK'; '2623: NVSL'; '3396: NFTI'; '3405: NGSC'; '3743: NYSG'; '4173: NTTK'; '4256: NATE'; '4263: NSTV';	25
		lcl|NC_045512.2_prot_YP_009724390.1_3 [gene=S] [locus_tag=GU280_gp02] [db_xref=GeneID:43740568] [protein=surface glycoprotein] [protein_id=YP_009724390.1] [location=21563..25384] [gbkey=CDS]	'17: NLTT'; '61: NVTW'; '74: NGTK'; '122: NATN'; '149: NKSW'; '165: NCTF'; '234: NITR'; '282: NGTI'; '331: NITN'; '343: NATR'; '603: NTSN'; '616: NCTE'; '657: NNSY'; '709: NNSI'; '717: NFTI'; '801: NFSQ'; '1074: NFTT'; '1098: NGTH'; '1134: NNTV'; '1158: NHTS'; '1173: NASV'; '1194: NESL';	22
		lcl|NC_045512.2_prot_YP_009724392.1_5 [gene=E] [locus_tag=GU280_gp04] [db_xref=GeneID:43740570] [protein=envelope protein] [protein_id=YP_009724392.1] [location=26245..26472] [gbkey=CDS]	'48: NVSL'; '66: NSSR';	2
		lcl|NC_045512.2_prot_YP_009724393.1_6 [gene=M] [locus_tag=GU280_gp05] [db_xref=GeneID:43740571] [protein=membrane glycoprotein] [protein_id=YP_009724393.1] [location=26523..27191] [gbkey=CDS]	'5: NGTI';	1
		lcl|NC_045512.2_prot_YP_009724394.1_7 [gene=ORF6] [locus_tag=GU280_gp06] [db_xref=GeneID:43740572] [protein=ORF6 protein] [protein_id=YP_009724394.1] [location=27202..27387] [gbkey=CDS]	'39: NLSK';	1
		lcl|NC_045512.2_prot_YP_009725318.1_9 [gene=ORF7b] [locus_tag=GU280_gp08] [db_xref=GeneID:43740574] [protein=ORF7b] [protein_id=YP_009725318.1] [location=27756..27887] [gbkey=CDS]	'38: NETC';	1
		lcl|NC_045512.2_prot_YP_009724396.1_10 [gene=ORF8] [locus_tag=GU280_gp09] [db_xref=GeneID:43740577] [protein=ORF8 protein] [protein_id=YP_009724396.1] [location=27894..28259] [gbkey=CDS]	'78: NYTV';	1
		lcl|NC_045512.2_prot_YP_009724397.2_11 [gene=N] [locus_tag=GU280_gp10] [db_xref=GeneID:43740575] [protein=nucleocapsid phosphoprotein] [protein_id=YP_009724397.2] [location=28274..29533] [gbkey=CDS]	'47: NNTA'; '192: NSSR'; '269: NVTQ';	3
AxxxAxxxAxxxW	0
VxxxIxxLxxxL	0
+++xx+	0
++x+	4
		lcl|NC_045512.2_prot_YP_009724389.1_1 [gene=orf1ab] [locus_tag=GU280_gp01] [db_xref=GeneID:43740578] [protein=orf1ab polyprotein] [exception=ribosomal slippage] [protein_id=YP_009724389.1] [location=join(266..13468,13468..21555)] [gbkey=CDS]	'1050: KKVK'; '1230: KKIK'; '1347: KKCK'; '1404: RKYK'; '1654: KKWK'; '2414: KRNR'; '3630: KHKH'; '3978: KKLK'; '4021: KRAK'; '5281: RKLH'; '5788: HKDK'; '6006: RHVR'; '6708: KRFK';	13
		lcl|NC_045512.2_prot_YP_009725295.1_2 [gene=orf1ab] [locus_tag=GU280_gp01] [db_xref=GeneID:43740578] [protein=orf1a polyprotein] [protein_id=YP_009725295.1] [location=266..13483] [gbkey=CDS]	'1050: KKVK'; '1230: KKIK'; '1347: KKCK'; '1404: RKYK'; '1654: KKWK'; '2414: KRNR'; '3630: KHKH'; '3978: KKLK'; '4021: KRAK';	9
		lcl|NC_045512.2_prot_YP_009724390.1_3 [gene=S] [locus_tag=GU280_gp02] [db_xref=GeneID:43740568] [protein=surface glycoprotein] [protein_id=YP_009724390.1] [location=21563..25384] [gbkey=CDS]	'682: RRAR';	1
		lcl|NC_045512.2_prot_YP_009724397.2_11 [gene=N] [locus_tag=GU280_gp10] [db_xref=GeneID:43740575] [protein=nucleocapsid phosphoprotein] [protein_id=YP_009724397.2] [location=28274..29533] [gbkey=CDS]	'92: RRIR'; '256: KKPR'; '369: KKDK';	3
KKTK	0
GPG[RQ]	0
KRIHIGPGRAFYTT	0
[GD]DIWK	0
LxxLL	6
		lcl|NC_045512.2_prot_YP_009724389.1_1 [gene=orf1ab] [locus_tag=GU280_gp01] [db_xref=GeneID:43740578] [protein=orf1ab polyprotein] [exception=ribosomal slippage] [protein_id=YP_009724389.1] [location=join(266..13468,13468..21555)] [gbkey=CDS]	'1145: LAPLL'; '1556: LKTLL'; '3531: LKELL'; '3588: LTSLL'; '3796: LFCLL'; '3915: LSVLL';	6
		lcl|NC_045512.2_prot_YP_009725295.1_2 [gene=orf1ab] [locus_tag=GU280_gp01] [db_xref=GeneID:43740578] [protein=orf1a polyprotein] [protein_id=YP_009725295.1] [location=266..13483] [gbkey=CDS]	'1145: LAPLL'; '1556: LKTLL'; '3531: LKELL'; '3588: LTSLL'; '3796: LFCLL'; '3915: LSVLL';	6
		lcl|NC_045512.2_prot_YP_009724390.1_3 [gene=S] [locus_tag=GU280_gp02] [db_xref=GeneID:43740568] [protein=surface glycoprotein] [protein_id=YP_009724390.1] [location=21563..25384] [gbkey=CDS]	'861: LPPLL';	1
		lcl|NC_045512.2_prot_YP_009724393.1_6 [gene=M] [locus_tag=GU280_gp05] [db_xref=GeneID:43740571] [protein=membrane glycoprotein] [protein_id=YP_009724393.1] [location=26523..27191] [gbkey=CDS]	'13: LKKLL';	1
		lcl|NC_045512.2_prot_YP_009725318.1_9 [gene=ORF7b] [locus_tag=GU280_gp08] [db_xref=GeneID:43740574] [protein=ORF7b] [protein_id=YP_009725318.1] [location=27756..27887] [gbkey=CDS]	'14: LAFLL';	1
		lcl|NC_045512.2_prot_YP_009724397.2_11 [gene=N] [locus_tag=GU280_gp10] [db_xref=GeneID:43740575] [protein=nucleocapsid phosphoprotein] [protein_id=YP_009724397.2] [location=28274..29533] [gbkey=CDS]	'219: LALLL';	1
Cx(2)Cx(6)Wx(3)Dx(5)Hx(6)C	0
xYxDx	4
		lcl|NC_045512.2_prot_YP_009724389.1_1 [gene=orf1ab] [locus_tag=GU280_gp01] [db_xref=GeneID:43740578] [protein=orf1ab polyprotein] [exception=ribosomal slippage] [protein_id=YP_009724389.1] [location=join(266..13468,13468..21555)] [gbkey=CDS]	'153: PYEDF'; '184: RYVDN'; '1255: LYIDI'; '1510: SYKDW'; '1597: TYLDG'; '2098: AYVDN'; '2503: LYFDK'; '2904: EYTDF'; '3316: NYEDL'; '3700: VYDDG'; '4279: AYKDY'; '4429: IYNDK'; '4680: KYWDQ'; '4870: KYFDC'; '4906: LYYDS'; '4912: SYEDQ'; '4997: VYSDV'; '5222: PYPDP'; '5268: EYADV'; '5528: DYGDA'; '6048: GYVDT'; '6371: YYSDS'; '6418: LYLDA'; '6688: VYGDF'; '6827: NYGDS';	25
		lcl|NC_045512.2_prot_YP_009725295.1_2 [gene=orf1ab] [locus_tag=GU280_gp01] [db_xref=GeneID:43740578] [protein=orf1a polyprotein] [protein_id=YP_009725295.1] [location=266..13483] [gbkey=CDS]	'153: PYEDF'; '184: RYVDN'; '1255: LYIDI'; '1510: SYKDW'; '1597: TYLDG'; '2098: AYVDN'; '2503: LYFDK'; '2904: EYTDF'; '3316: NYEDL'; '3700: VYDDG'; '4279: AYKDY';	11
		lcl|NC_045512.2_prot_YP_009724390.1_3 [gene=S] [locus_tag=GU280_gp02] [db_xref=GeneID:43740568] [protein=surface glycoprotein] [protein_id=YP_009724390.1] [location=21563..25384] [gbkey=CDS]	'37: YYPDK'; '395: VYADS'; '611: LYQDV'; '836: QYGDC';	4
		lcl|NC_045512.2_prot_YP_009724396.1_10 [gene=ORF8] [locus_tag=GU280_gp09] [db_xref=GeneID:43740577] [protein=ORF8 protein] [protein_id=YP_009724396.1] [location=27894..28259] [gbkey=CDS]	'72: QYIDI'; '104: FYEDF'; '110: EYHDV';	3
PxxP	5
		lcl|NC_045512.2_prot_YP_009724389.1_1 [gene=orf1ab] [locus_tag=GU280_gp01] [db_xref=GeneID:43740578] [protein=orf1ab polyprotein] [exception=ribosomal slippage] [protein_id=YP_009724389.1] [location=join(266..13468,13468..21555)] [gbkey=CDS]	'1916: PNQP'; '2480: PINP'; '2867: PGLP'; '3134: PLVP'; '3359: PKTP'; '4220: PKGP'; '5496: PRPP'; '5968: PGIP';	8
		lcl|NC_045512.2_prot_YP_009725295.1_2 [gene=orf1ab] [locus_tag=GU280_gp01] [db_xref=GeneID:43740578] [protein=orf1a polyprotein] [protein_id=YP_009725295.1] [location=266..13483] [gbkey=CDS]	'1916: PNQP'; '2480: PINP'; '2867: PGLP'; '3134: PLVP'; '3359: PKTP'; '4220: PKGP';	6
		lcl|NC_045512.2_prot_YP_009724390.1_3 [gene=S] [locus_tag=GU280_gp02] [db_xref=GeneID:43740568] [protein=surface glycoprotein] [protein_id=YP_009724390.1] [location=21563..25384] [gbkey=CDS]	'82: PVLP'; '809: PSKP'; '1140: PLQP';	3
		lcl|NC_045512.2_prot_YP_009724395.1_8 [gene=ORF7a] [locus_tag=GU280_gp07] [db_xref=GeneID:43740573] [protein=ORF7a protein] [protein_id=YP_009724395.1] [location=27394..27759] [gbkey=CDS]	'45: PFHP';	1
		lcl|NC_045512.2_prot_YP_009724397.2_11 [gene=N] [locus_tag=GU280_gp10] [db_xref=GeneID:43740575] [protein=nucleocapsid phosphoprotein] [protein_id=YP_009724397.2] [location=28274..29533] [gbkey=CDS]	'365: PTEP';	1
YxYxx!	7
		lcl|NC_045512.2_prot_YP_009724389.1_1 [gene=orf1ab] [locus_tag=GU280_gp01] [db_xref=GeneID:43740578] [protein=orf1ab polyprotein] [exception=ribosomal slippage] [protein_id=YP_009724389.1] [location=join(266..13468,13468..21555)] [gbkey=CDS]	'2435: YVYANG'; '3109: YLYLTF'; '3214: YKYFSG'; '3500: YNYEPL'; '4845: YDYYRY'; '5218: YVYLPY'; '5865: YDYVIF'; '6160: YVYNPF';	8
		lcl|NC_045512.2_prot_YP_009725295.1_2 [gene=orf1ab] [locus_tag=GU280_gp01] [db_xref=GeneID:43740578] [protein=orf1a polyprotein] [protein_id=YP_009725295.1] [location=266..13483] [gbkey=CDS]	'2435: YVYANG'; '3109: YLYLTF'; '3214: YKYFSG'; '3500: YNYEPL';	4
		lcl|NC_045512.2_prot_YP_009724390.1_3 [gene=S] [locus_tag=GU280_gp02] [db_xref=GeneID:43740568] [protein=surface glycoprotein] [protein_id=YP_009724390.1] [location=21563..25384] [gbkey=CDS]	'421: YNYKLP'; '451: YLYRLF';	2
		lcl|NC_045512.2_prot_YP_009724391.1_4 [gene=ORF3a] [locus_tag=GU280_gp03] [db_xref=GeneID:43740569] [protein=ORF3a protein] [protein_id=YP_009724391.1] [location=25393..26220] [gbkey=CDS]	'107: YLYALV'; '154: YDYCIP';	2
		lcl|NC_045512.2_prot_YP_009724392.1_5 [gene=E] [locus_tag=GU280_gp04] [db_xref=GeneID:43740570] [protein=envelope protein] [protein_id=YP_009724392.1] [location=26245..26472] [gbkey=CDS]	'57: YVYSRV';	1
		lcl|NC_045512.2_prot_YP_009724395.1_8 [gene=ORF7a] [locus_tag=GU280_gp07] [db_xref=GeneID:43740573] [protein=ORF7a protein] [protein_id=YP_009724395.1] [location=27394..27759] [gbkey=CDS]	'18: YHYQEC';	1
		lcl|NC_045512.2_prot_YP_009724397.2_11 [gene=N] [locus_tag=GU280_gp10] [db_xref=GeneID:43740575] [protein=nucleocapsid phosphoprotein] [protein_id=YP_009724397.2] [location=28274..29533] [gbkey=CDS]	'109: YFYYLG';	1
YxYxx[FILV]	5
		lcl|NC_045512.2_prot_YP_009724389.1_1 [gene=orf1ab] [locus_tag=GU280_gp01] [db_xref=GeneID:43740578] [protein=orf1ab polyprotein] [exception=ribosomal slippage] [protein_id=YP_009724389.1] [location=join(266..13468,13468..21555)] [gbkey=CDS]	'3109: YLYLTF'; '3500: YNYEPL'; '5865: YDYVIF'; '6160: YVYNPF';	4
		lcl|NC_045512.2_prot_YP_009725295.1_2 [gene=orf1ab] [locus_tag=GU280_gp01] [db_xref=GeneID:43740578] [protein=orf1a polyprotein] [protein_id=YP_009725295.1] [location=266..13483] [gbkey=CDS]	'3109: YLYLTF'; '3500: YNYEPL';	2
		lcl|NC_045512.2_prot_YP_009724390.1_3 [gene=S] [locus_tag=GU280_gp02] [db_xref=GeneID:43740568] [protein=surface glycoprotein] [protein_id=YP_009724390.1] [location=21563..25384] [gbkey=CDS]	'451: YLYRLF';	1
		lcl|NC_045512.2_prot_YP_009724391.1_4 [gene=ORF3a] [locus_tag=GU280_gp03] [db_xref=GeneID:43740569] [protein=ORF3a protein] [protein_id=YP_009724391.1] [location=25393..26220] [gbkey=CDS]	'107: YLYALV';	1
		lcl|NC_045512.2_prot_YP_009724392.1_5 [gene=E] [locus_tag=GU280_gp04] [db_xref=GeneID:43740570] [protein=envelope protein] [protein_id=YP_009724392.1] [location=26245..26472] [gbkey=CDS]	'57: YVYSRV';	1
NYx[EK]C[LI][KIR][NT]APYID	0
[RKY]xxPxxP	0
PxxPx[KR]	2
		lcl|NC_045512.2_prot_YP_009724390.1_3 [gene=S] [locus_tag=GU280_gp02] [db_xref=GeneID:43740568] [protein=surface glycoprotein] [protein_id=YP_009724390.1] [location=21563..25384] [gbkey=CDS]	'809: PSKPSK';	1
		lcl|NC_045512.2_prot_YP_009724397.2_11 [gene=N] [locus_tag=GU280_gp10] [db_xref=GeneID:43740575] [protein=nucleocapsid phosphoprotein] [protein_id=YP_009724397.2] [location=28274..29533] [gbkey=CDS]	'365: PTEPKK';	1
xx[PV]xxP	7
		lcl|NC_045512.2_prot_YP_009724389.1_1 [gene=orf1ab] [locus_tag=GU280_gp01] [db_xref=GeneID:43740578] [protein=orf1ab polyprotein] [exception=ribosomal slippage] [protein_id=YP_009724389.1] [location=join(266..13468,13468..21555)] [gbkey=CDS]	'104: LGVLVP'; '304: YPVASP'; '772: EAVEAP'; '1115: LHVVGP'; '1297: TAVVIP'; '1444: TLVTMP'; '1475: VSVSSP'; '1781: KGVQIP'; '1914: LVPNQP'; '2050: EVVENP'; '2478: KRPINP'; '2865: VVPGLP'; '3132: FTPLVP'; '3195: SDVLLP'; '3297: DVVYCP'; '3357: ANPKTP'; '3651: NMVYMP'; '4070: LMVVIP'; '4218: DTPKGP'; '4348: KYVQIP'; '4556: DFVENP'; '4710: STVFPP'; '4999: SDVENP'; '5217: DYVYLP'; '5491: WEVGKP'; '5…	30
		lcl|NC_045512.2_prot_YP_009725295.1_2 [gene=orf1ab] [locus_tag=GU280_gp01] [db_xref=GeneID:43740578] [protein=orf1a polyprotein] [protein_id=YP_009725295.1] [location=266..13483] [gbkey=CDS]	'104: LGVLVP'; '304: YPVASP'; '772: EAVEAP'; '1115: LHVVGP'; '1297: TAVVIP'; '1444: TLVTMP'; '1475: VSVSSP'; '1781: KGVQIP'; '1914: LVPNQP'; '2050: EVVENP'; '2478: KRPINP'; '2865: VVPGLP'; '3132: FTPLVP'; '3195: SDVLLP'; '3297: DVVYCP'; '3357: ANPKTP'; '3651: NMVYMP'; '4070: LMVVIP'; '4218: DTPKGP'; '4348: KYVQIP';	20
		lcl|NC_045512.2_prot_YP_009724390.1_3 [gene=S] [locus_tag=GU280_gp02] [db_xref=GeneID:43740568] [protein=surface glycoprotein] [protein_id=YP_009724390.1] [location=21563..25384] [gbkey=CDS]	'4: FLVLLP'; '34: RGVYYP'; '80: DNPVLP'; '169: EYVSQP'; '225: PLVDLP'; '325: SIVRFP'; '522: ATVCGP'; '574: DAVRDP'; '595: VSVITP'; '807: PDPSKP'; '858: LTVLPP'; '1135: NTVYDP';	12
		lcl|NC_045512.2_prot_YP_009724391.1_4 [gene=ORF3a] [locus_tag=GU280_gp03] [db_xref=GeneID:43740569] [protein=ORF3a protein] [protein_id=YP_009724391.1] [location=25393..26220] [gbkey=CDS]	'235: KIVDEP'; '253: SGVVNP';	2
		lcl|NC_045512.2_prot_YP_009724395.1_8 [gene=ORF7a] [locus_tag=GU280_gp07] [db_xref=GeneID:43740573] [protein=ORF7a protein] [protein_id=YP_009724395.1] [location=27394..27759] [gbkey=CDS]	'43: NSPFHP';	1
		lcl|NC_045512.2_prot_YP_009724396.1_10 [gene=ORF8] [locus_tag=GU280_gp09] [db_xref=GeneID:43740577] [protein=ORF8 protein] [protein_id=YP_009724396.1] [location=27894..28259] [gbkey=CDS]	'31: YVVDDP';	1
		lcl|NC_045512.2_prot_YP_009724397.2_11 [gene=N] [locus_tag=GU280_gp10] [db_xref=GeneID:43740575] [protein=nucleocapsid phosphoprotein] [protein_id=YP_009724397.2] [location=28274..29533] [gbkey=CDS]	'363: FPPTEP';	1
[ILV]QxxxRGxxx[RK]	0
Ax(3)IQx(2)FRx(4)KK	0
LRGG	0
Yxx[LI]x(6,8)Yxx[LI]	2
		lcl|NC_045512.2_prot_YP_009724389.1_1 [gene=orf1ab] [locus_tag=GU280_gp01] [db_xref=GeneID:43740578] [protein=orf1ab polyprotein] [exception=ribosomal slippage] [protein_id=YP_009724389.1] [location=join(266..13468,13468..21555)] [gbkey=CDS]	'3098: YSFLPGVYSVIYLYL'; '3783: YCFLGYFCTCYFGL';	2
		lcl|NC_045512.2_prot_YP_009725295.1_2 [gene=orf1ab] [locus_tag=GU280_gp01] [db_xref=GeneID:43740578] [protein=orf1a polyprotein] [protein_id=YP_009725295.1] [location=266..13483] [gbkey=CDS]	'3098: YSFLPGVYSVIYLYL'; '3783: YCFLGYFCTCYFGL';	2
[SIVL]xYxx[IVL]	6
		lcl|NC_045512.2_prot_YP_009724389.1_1 [gene=orf1ab] [locus_tag=GU280_gp01] [db_xref=GeneID:43740578] [protein=orf1ab polyprotein] [exception=ribosomal slippage] [protein_id=YP_009724389.1] [location=join(266..13468,13468..21555)] [gbkey=CDS]	'116: VAYRKV'; '1029: SGYLKL'; '1254: LLYIDI'; '2559: VYYSQL'; '2675: LTYNKV'; '2807: IGYKAI'; '2943: VAYESL'; '3107: VIYLYL'; '3415: IDYDCV'; '3742: SNYSGV'; '3763: VEYCPI'; '3781: LVYCFL'; '4628: SYYSLL'; '5646: LKYLPI'; '5863: SEYDYV'; '6077: LMYKGL'; '6219: IEYPII'; '6388: IDYVPL'; '6774: IDYTEI';	19
		lcl|NC_045512.2_prot_YP_009725295.1_2 [gene=orf1ab] [locus_tag=GU280_gp01] [db_xref=GeneID:43740578] [protein=orf1a polyprotein] [protein_id=YP_009725295.1] [location=266..13483] [gbkey=CDS]	'116: VAYRKV'; '1029: SGYLKL'; '1254: LLYIDI'; '2559: VYYSQL'; '2675: LTYNKV'; '2807: IGYKAI'; '2943: VAYESL'; '3107: VIYLYL'; '3415: IDYDCV'; '3742: SNYSGV'; '3763: VEYCPI'; '3781: LVYCFL';	12
		lcl|NC_045512.2_prot_YP_009724390.1_3 [gene=S] [locus_tag=GU280_gp02] [db_xref=GeneID:43740568] [protein=surface glycoprotein] [protein_id=YP_009724390.1] [location=21563..25384] [gbkey=CDS]	'610: VLYQDV';	1
		lcl|NC_045512.2_prot_YP_009724391.1_4 [gene=ORF3a] [locus_tag=GU280_gp03] [db_xref=GeneID:43740569] [protein=ORF3a protein] [protein_id=YP_009724391.1] [location=25393..26220] [gbkey=CDS]	'158: IPYNSV'; '209: SDYYQL';	2
		lcl|NC_045512.2_prot_YP_009724393.1_6 [gene=M] [locus_tag=GU280_gp05] [db_xref=GeneID:43740571] [protein=membrane glycoprotein] [protein_id=YP_009724393.1] [location=26523..27191] [gbkey=CDS]	'176: LSYYKL';	1
		lcl|NC_045512.2_prot_YP_009724396.1_10 [gene=ORF8] [locus_tag=GU280_gp09] [db_xref=GeneID:43740577] [protein=ORF8 protein] [protein_id=YP_009724396.1] [location=27894..28259] [gbkey=CDS]	'71: IQYIDI'; '109: LEYHDV';	2
[RK]xxxx!x!	8
		lcl|NC_045512.2_prot_YP_009724389.1_1 [gene=orf1ab] [locus_tag=GU280_gp01] [db_xref=GeneID:43740578] [protein=orf1ab polyprotein] [exception=ribosomal slippage] [protein_id=YP_009724389.1] [location=join(266..13468,13468..21555)] [gbkey=CDS]	'11: KTHVQLSL'; '47: KDGTCGLV'; '77: RTAPHGHV'; '99: RSGETLGV'; '125: KNGNKGAG'; '175: RELNGGAY'; '244: RSEKSYEL'; '261: KKFDTFNG'; '290: KKKLDGFM'; '299: RIRSVYPV'; '338: KATCEFCG'; '399: KGGRTIAF'; '426: RASANIGC'; '456: KEKVNINI'; '468: KLNEEIAI'; '527: KSILSPLY'; '560: RVLQKAAI'; '579: RLIDAMMF'; '623: KLKPVLDW'; '634: KFKEGVEF'; '650: KFISTCAC'; '680: KLVNKFLA'; '724: REETGLLM'; '734: KAPKEI…	168
		lcl|NC_045512.2_prot_YP_009725295.1_2 [gene=orf1ab] [locus_tag=GU280_gp01] [db_xref=GeneID:43740578] [protein=orf1a polyprotein] [protein_id=YP_009725295.1] [location=266..13483] [gbkey=CDS]	'11: KTHVQLSL'; '47: KDGTCGLV'; '77: RTAPHGHV'; '99: RSGETLGV'; '125: KNGNKGAG'; '175: RELNGGAY'; '244: RSEKSYEL'; '261: KKFDTFNG'; '290: KKKLDGFM'; '299: RIRSVYPV'; '338: KATCEFCG'; '399: KGGRTIAF'; '426: RASANIGC'; '456: KEKVNINI'; '468: KLNEEIAI'; '527: KSILSPLY'; '560: RVLQKAAI'; '579: RLIDAMMF'; '623: KLKPVLDW'; '634: KFKEGVEF'; '650: KFISTCAC'; '680: KLVNKFLA'; '724: REETGLLM'; '734: KAPKEI…	93
		lcl|NC_045512.2_prot_YP_009724390.1_3 [gene=S] [locus_tag=GU280_gp02] [db_xref=GeneID:43740568] [protein=surface glycoprotein] [protein_id=YP_009724390.1] [location=21563..25384] [gbkey=CDS]	'21: RTQLPPAY'; '77: KRFDNPVL'; '113: KTQSLLIV'; '187: KNLREFVF'; '237: RFQTLLAL'; '278: KYNENGTI'; '346: RFASVYAW'; '356: KRISNCVA'; '424: KLPDDFTG'; '444: KVGGNYNY'; '577: RDPQTLEI'; '646: RAGCLIGA'; '733: KTSVDCTM'; '765: RALTGIAV'; '776: KNTQEVFA'; '795: KDFGGFNF'; '835: KQYGDCLG'; '986: KVEAEVQI'; '1019: RASANLAA'; '1028: KMSECVLG'; '1039: RVDFCGKG'; '1073: KNFTTAPA'; '1107: RNFYEPQI'; '1157…	25
		lcl|NC_045512.2_prot_YP_009724391.1_4 [gene=ORF3a] [locus_tag=GU280_gp03] [db_xref=GeneID:43740569] [protein=ORF3a protein] [protein_id=YP_009724391.1] [location=25393..26220] [gbkey=CDS]	'6: RIFTIGTV'; '30: RATATIPI'; '66: KKRWQLAL'; '122: RIIMRLWL'; '134: RSKNPLLY';	5
		lcl|NC_045512.2_prot_YP_009724393.1_6 [gene=M] [locus_tag=GU280_gp05] [db_xref=GeneID:43740571] [protein=membrane glycoprotein] [protein_id=YP_009724393.1] [location=26523..27191] [gbkey=CDS]	'15: KLLEQWNL'; '42: RNRFLYII'; '50: KLIFLWLL'; '105: RTRSMWSF'; '146: RGHLRIAG'; '174: RTLSYYKL';	6
		lcl|NC_045512.2_prot_YP_009724395.1_8 [gene=ORF7a] [locus_tag=GU280_gp07] [db_xref=GeneID:43740573] [protein=ORF7a protein] [protein_id=YP_009724395.1] [location=27394..27759] [gbkey=CDS]	'2: KIILFLAL'; '72: KHVYQLRA';	2
		lcl|NC_045512.2_prot_YP_009724396.1_10 [gene=ORF8] [locus_tag=GU280_gp09] [db_xref=GeneID:43740577] [protein=ORF8 protein] [protein_id=YP_009724396.1] [location=27894..28259] [gbkey=CDS]	'2: KFLVFLGI'; '44: KWYIRVGA'; '53: KSAPLIEL';	3
		lcl|NC_045512.2_prot_YP_009724397.2_11 [gene=N] [locus_tag=GU280_gp10] [db_xref=GeneID:43740575] [protein=nucleocapsid phosphoprotein] [protein_id=YP_009724397.2] [location=28274..29533] [gbkey=CDS]	'10: RNAPRITF'; '89: RATRRIRG'; '107: RWYFYYLG'; '127: KDGIIWVA'; '203: RGTSPARM'; '319: RIGMEVTP'; '387: KKQQTVTL';	7
[RK]xxxx[FILV]x[FILV]	8
		lcl|NC_045512.2_prot_YP_009724389.1_1 [gene=orf1ab] [locus_tag=GU280_gp01] [db_xref=GeneID:43740578] [protein=orf1ab polyprotein] [exception=ribosomal slippage] [protein_id=YP_009724389.1] [location=join(266..13468,13468..21555)] [gbkey=CDS]	'11: KTHVQLSL'; '99: RSGETLGV'; '399: KGGRTIAF'; '456: KEKVNINI'; '468: KLNEEIAI'; '634: KFKEGVEF'; '734: KAPKEIIF'; '1033: KLTDNVYI'; '1051: KVKPTVVV'; '1170: RTNVYLAV'; '1348: KCKSAFYI'; '1386: RKLMPVCV'; '1404: RKYKGIKI'; '1464: RYMRSLKV'; '1563: REVRTIKV'; '2204: KSVGKFCL'; '2336: RFFYVLGL'; '2533: KGSLPINV'; '2735: KNNLPFKL'; '2771: KQLIKVTL'; '2991: RSEAGVCV'; '3192: KLRSDVLL'; '3324: KSNHN…	48
		lcl|NC_045512.2_prot_YP_009725295.1_2 [gene=orf1ab] [locus_tag=GU280_gp01] [db_xref=GeneID:43740578] [protein=orf1a polyprotein] [protein_id=YP_009725295.1] [location=266..13483] [gbkey=CDS]	'11: KTHVQLSL'; '99: RSGETLGV'; '399: KGGRTIAF'; '456: KEKVNINI'; '468: KLNEEIAI'; '634: KFKEGVEF'; '734: KAPKEIIF'; '1033: KLTDNVYI'; '1051: KVKPTVVV'; '1170: RTNVYLAV'; '1348: KCKSAFYI'; '1386: RKLMPVCV'; '1404: RKYKGIKI'; '1464: RYMRSLKV'; '1563: REVRTIKV'; '2204: KSVGKFCL'; '2336: RFFYVLGL'; '2533: KGSLPINV'; '2735: KNNLPFKL'; '2771: KQLIKVTL'; '2991: RSEAGVCV'; '3192: KLRSDVLL'; '3324: KSNHN…	28
		lcl|NC_045512.2_prot_YP_009724390.1_3 [gene=S] [locus_tag=GU280_gp02] [db_xref=GeneID:43740568] [protein=surface glycoprotein] [protein_id=YP_009724390.1] [location=21563..25384] [gbkey=CDS]	'113: KTQSLLIV'; '187: KNLREFVF'; '237: RFQTLLAL'; '577: RDPQTLEI'; '765: RALTGIAV'; '795: KDFGGFNF'; '986: KVEAEVQI'; '1211: KWPWYIWL';	8
		lcl|NC_045512.2_prot_YP_009724391.1_4 [gene=ORF3a] [locus_tag=GU280_gp03] [db_xref=GeneID:43740569] [protein=ORF3a protein] [protein_id=YP_009724391.1] [location=25393..26220] [gbkey=CDS]	'30: RATATIPI'; '66: KKRWQLAL'; '122: RIIMRLWL';	3
		lcl|NC_045512.2_prot_YP_009724393.1_6 [gene=M] [locus_tag=GU280_gp05] [db_xref=GeneID:43740571] [protein=membrane glycoprotein] [protein_id=YP_009724393.1] [location=26523..27191] [gbkey=CDS]	'44: RFLYIIKL';	1
		lcl|NC_045512.2_prot_YP_009724395.1_8 [gene=ORF7a] [locus_tag=GU280_gp07] [db_xref=GeneID:43740573] [protein=ORF7a protein] [protein_id=YP_009724395.1] [location=27394..27759] [gbkey=CDS]	'2: KIILFLAL';	1
		lcl|NC_045512.2_prot_YP_009724396.1_10 [gene=ORF8] [locus_tag=GU280_gp09] [db_xref=GeneID:43740577] [protein=ORF8 protein] [protein_id=YP_009724396.1] [location=27894..28259] [gbkey=CDS]	'2: KFLVFLGI'; '53: KSAPLIEL';	2
		lcl|NC_045512.2_prot_YP_009724397.2_11 [gene=N] [locus_tag=GU280_gp10] [db_xref=GeneID:43740575] [protein=nucleocapsid phosphoprotein] [protein_id=YP_009724397.2] [location=28274..29533] [gbkey=CDS]	'10: RNAPRITF'; '387: KKQQTVTL';	2
WxxF	3
		lcl|NC_045512.2_prot_YP_009724389.1_1 [gene=orf1ab] [locus_tag=GU280_gp01] [db_xref=GeneID:43740578] [protein=orf1ab polyprotein] [exception=ribosomal slippage] [protein_id=YP_009724389.1] [location=join(266..13468,13468..21555)] [gbkey=CDS]	'3600: WSLF'; '4193: WARF'; '4554: WYDF'; '4608: WYDF'; '6011: WIGF'; '6445: WNTF'; '6988: WTAF';	7
		lcl|NC_045512.2_prot_YP_009725295.1_2 [gene=orf1ab] [locus_tag=GU280_gp01] [db_xref=GeneID:43740578] [protein=orf1a polyprotein] [protein_id=YP_009725295.1] [location=266..13483] [gbkey=CDS]	'3600: WSLF'; '4193: WARF';	2
		lcl|NC_045512.2_prot_YP_009724390.1_3 [gene=S] [locus_tag=GU280_gp02] [db_xref=GeneID:43740568] [protein=surface glycoprotein] [protein_id=YP_009724390.1] [location=21563..25384] [gbkey=CDS]	'1217: WLGF';	1
KRxxPxGPDPxH	0
KDEL	0
Yxx!	12
		lcl|NC_045512.2_prot_YP_009724389.1_1 [gene=orf1ab] [locus_tag=GU280_gp01] [db_xref=GeneID:43740578] [protein=orf1ab polyprotein] [exception=ribosomal slippage] [protein_id=YP_009724389.1] [location=join(266..13468,13468..21555)] [gbkey=CDS]	'68: YVFI'; '118: YRKV'; '154: YEDF'; '182: YTRY'; '304: YPVA'; '369: YCPA'; '413: YVGC'; '422: YWVP'; '496: YKAF'; '534: YAFA'; '600: YITG'; '621: YEKL'; '717: YRKC'; '799: YCAL'; '836: YKSV'; '905: YYLF'; '921: YCSF'; '947: YEYG'; '1031: YLKL'; '1135: YENF'; '1174: YLAV'; '1183: YDKL'; '1256: YIDI'; '1285: YIVG'; '1354: YILP'; '1406: YKGI'; '1486: YNGY'; '1511: YKDW'; '1598: YLDG'; '1619: YVLP'…	177
		lcl|NC_045512.2_prot_YP_009725295.1_2 [gene=orf1ab] [locus_tag=GU280_gp01] [db_xref=GeneID:43740578] [protein=orf1a polyprotein] [protein_id=YP_009725295.1] [location=266..13483] [gbkey=CDS]	'68: YVFI'; '118: YRKV'; '154: YEDF'; '182: YTRY'; '304: YPVA'; '369: YCPA'; '413: YVGC'; '422: YWVP'; '496: YKAF'; '534: YAFA'; '600: YITG'; '621: YEKL'; '717: YRKC'; '799: YCAL'; '836: YKSV'; '905: YYLF'; '921: YCSF'; '947: YEYG'; '1031: YLKL'; '1135: YENF'; '1174: YLAV'; '1183: YDKL'; '1256: YIDI'; '1285: YIVG'; '1354: YILP'; '1406: YKGI'; '1486: YNGY'; '1511: YKDW'; '1598: YLDG'; '1619: YVLP'…	105
		lcl|NC_045512.2_prot_YP_009724390.1_3 [gene=S] [locus_tag=GU280_gp02] [db_xref=GeneID:43740568] [protein=surface glycoprotein] [protein_id=YP_009724390.1] [location=21563..25384] [gbkey=CDS]	'160: YSSA'; '200: YFKI'; '248: YLTP'; '265: YYVG'; '269: YLQP'; '365: YSVL'; '369: YNSA'; '423: YKLP'; '449: YNYL'; '453: YRLF'; '473: YQAG'; '489: YFPL'; '505: YQPY'; '612: YQDV'; '636: YSTG'; '741: YICG'; '756: YGSF'; '789: YKTP'; '837: YGDC'; '873: YTSA'; '1047: YHLM'; '1067: YVPA'; '1138: YDPL'; '1206: YEQY'; '1215: YIWL';	25
		lcl|NC_045512.2_prot_YP_009724391.1_4 [gene=ORF3a] [locus_tag=GU280_gp03] [db_xref=GeneID:43740569] [protein=ORF3a protein] [protein_id=YP_009724391.1] [location=25393..26220] [gbkey=CDS]	'91: YSHL'; '107: YLYA'; '145: YFLC'; '154: YDYC'; '160: YNSV'; '184: YQIG'; '211: YYQL'; '233: YNKI'; '264: YDEP';	9
		lcl|NC_045512.2_prot_YP_009724392.1_5 [gene=E] [locus_tag=GU280_gp04] [db_xref=GeneID:43740570] [protein=envelope protein] [protein_id=YP_009724392.1] [location=26245..26472] [gbkey=CDS]	'2: YSFV'; '59: YSRV';	2
		lcl|NC_045512.2_prot_YP_009724393.1_6 [gene=M] [locus_tag=GU280_gp05] [db_xref=GeneID:43740571] [protein=membrane glycoprotein] [protein_id=YP_009724393.1] [location=26523..27191] [gbkey=CDS]	'95: YFIA'; '178: YYKL'; '196: YSRY';	3
		lcl|NC_045512.2_prot_YP_009724394.1_7 [gene=ORF6] [locus_tag=GU280_gp06] [db_xref=GeneID:43740572] [protein=ORF6 protein] [protein_id=YP_009724394.1] [location=27202..27387] [gbkey=CDS]	'49: YSQL';	1
		lcl|NC_045512.2_prot_YP_009724395.1_8 [gene=ORF7a] [locus_tag=GU280_gp07] [db_xref=GeneID:43740573] [protein=ORF7a protein] [protein_id=YP_009724395.1] [location=27394..27759] [gbkey=CDS]	'20: YQEC'; '97: YSPI';	2
		lcl|NC_045512.2_prot_YP_009725318.1_9 [gene=ORF7b] [locus_tag=GU280_gp08] [db_xref=GeneID:43740574] [protein=ORF7b] [protein_id=YP_009725318.1] [location=27756..27887] [gbkey=CDS]	'10: YLCF';	1
		lcl|NC_045512.2_prot_YP_009724396.1_10 [gene=ORF8] [locus_tag=GU280_gp09] [db_xref=GeneID:43740577] [protein=ORF8 protein] [protein_id=YP_009724396.1] [location=27894..28259] [gbkey=CDS]	'42: YSKW'; '46: YIRV'; '73: YIDI'; '105: YEDF'; '111: YHDV';	5
		lcl|NC_045512.2_prot_YP_009724397.2_11 [gene=N] [locus_tag=GU280_gp10] [db_xref=GeneID:43740575] [protein=nucleocapsid phosphoprotein] [protein_id=YP_009724397.2] [location=28274..29533] [gbkey=CDS]	'87: YRRA'; '109: YFYY'; '172: YAEG'; '298: YKHW'; '333: YTGA'; '360: YKTF';	6
		lcl|NC_045512.2_prot_YP_009725255.1_12 [gene=ORF10] [locus_tag=GU280_gp11] [db_xref=GeneID:43740576] [protein=ORF10 protein] [protein_id=YP_009725255.1] [location=29558..29674] [gbkey=CDS]	'3: YINV'; '14: YSLL';	2
Yxx[FILV]	12
		lcl|NC_045512.2_prot_YP_009724389.1_1 [gene=orf1ab] [locus_tag=GU280_gp01] [db_xref=GeneID:43740578] [protein=orf1ab polyprotein] [exception=ribosomal slippage] [protein_id=YP_009724389.1] [location=join(266..13468,13468..21555)] [gbkey=CDS]	'68: YVFI'; '118: YRKV'; '154: YEDF'; '496: YKAF'; '621: YEKL'; '799: YCAL'; '836: YKSV'; '905: YYLF'; '921: YCSF'; '1031: YLKL'; '1135: YENF'; '1174: YLAV'; '1183: YDKL'; '1256: YIDI'; '1406: YKGI'; '1658: YPQV'; '1776: YEQF'; '1836: YKHI'; '2301: YPSL'; '2331: YILF'; '2353: YFAV'; '2384: YIFF'; '2397: YVHV'; '2561: YSQL'; '2677: YNKV'; '2809: YKAI'; '2905: YTDF'; '2945: YESL'; '3011: YRSL'; '30…	89
		lcl|NC_045512.2_prot_YP_009725295.1_2 [gene=orf1ab] [locus_tag=GU280_gp01] [db_xref=GeneID:43740578] [protein=orf1a polyprotein] [protein_id=YP_009725295.1] [location=266..13483] [gbkey=CDS]	'68: YVFI'; '118: YRKV'; '154: YEDF'; '496: YKAF'; '621: YEKL'; '799: YCAL'; '836: YKSV'; '905: YYLF'; '921: YCSF'; '1031: YLKL'; '1135: YENF'; '1174: YLAV'; '1183: YDKL'; '1256: YIDI'; '1406: YKGI'; '1658: YPQV'; '1776: YEQF'; '1836: YKHI'; '2301: YPSL'; '2331: YILF'; '2353: YFAV'; '2384: YIFF'; '2397: YVHV'; '2561: YSQL'; '2677: YNKV'; '2809: YKAI'; '2905: YTDF'; '2945: YESL'; '3011: YRSL'; '30…	53
		lcl|NC_045512.2_prot_YP_009724390.1_3 [gene=S] [locus_tag=GU280_gp02] [db_xref=GeneID:43740568] [protein=surface glycoprotein] [protein_id=YP_009724390.1] [location=21563..25384] [gbkey=CDS]	'200: YFKI'; '365: YSVL'; '449: YNYL'; '453: YRLF'; '489: YFPL'; '508: YRVV'; '612: YQDV'; '756: YGSF'; '1138: YDPL'; '1215: YIWL';	10
		lcl|NC_045512.2_prot_YP_009724391.1_4 [gene=ORF3a] [locus_tag=GU280_gp03] [db_xref=GeneID:43740569] [protein=ORF3a protein] [protein_id=YP_009724391.1] [location=25393..26220] [gbkey=CDS]	'91: YSHL'; '109: YALV'; '160: YNSV'; '211: YYQL'; '233: YNKI';	5
		lcl|NC_045512.2_prot_YP_009724392.1_5 [gene=E] [locus_tag=GU280_gp04] [db_xref=GeneID:43740570] [protein=envelope protein] [protein_id=YP_009724392.1] [location=26245..26472] [gbkey=CDS]	'2: YSFV'; '59: YSRV';	2
		lcl|NC_045512.2_prot_YP_009724393.1_6 [gene=M] [locus_tag=GU280_gp05] [db_xref=GeneID:43740571] [protein=membrane glycoprotein] [protein_id=YP_009724393.1] [location=26523..27191] [gbkey=CDS]	'178: YYKL';	1
		lcl|NC_045512.2_prot_YP_009724394.1_7 [gene=ORF6] [locus_tag=GU280_gp06] [db_xref=GeneID:43740572] [protein=ORF6 protein] [protein_id=YP_009724394.1] [location=27202..27387] [gbkey=CDS]	'49: YSQL';	1
		lcl|NC_045512.2_prot_YP_009724395.1_8 [gene=ORF7a] [locus_tag=GU280_gp07] [db_xref=GeneID:43740573] [protein=ORF7a protein] [protein_id=YP_009724395.1] [location=27394..27759] [gbkey=CDS]	'97: YSPI';	1
		lcl|NC_045512.2_prot_YP_009725318.1_9 [gene=ORF7b] [locus_tag=GU280_gp08] [db_xref=GeneID:43740574] [protein=ORF7b] [protein_id=YP_009725318.1] [location=27756..27887] [gbkey=CDS]	'10: YLCF';	1
		lcl|NC_045512.2_prot_YP_009724396.1_10 [gene=ORF8] [locus_tag=GU280_gp09] [db_xref=GeneID:43740577] [protein=ORF8 protein] [protein_id=YP_009724396.1] [location=27894..28259] [gbkey=CDS]	'46: YIRV'; '73: YIDI'; '105: YEDF'; '111: YHDV';	4
		lcl|NC_045512.2_prot_YP_009724397.2_11 [gene=N] [locus_tag=GU280_gp10] [db_xref=GeneID:43740575] [protein=nucleocapsid phosphoprotein] [protein_id=YP_009724397.2] [location=28274..29533] [gbkey=CDS]	'360: YKTF';	1
		lcl|NC_045512.2_prot_YP_009725255.1_12 [gene=ORF10] [locus_tag=GU280_gp11] [db_xref=GeneID:43740576] [protein=ORF10 protein] [protein_id=YP_009725255.1] [location=29558..29674] [gbkey=CDS]	'3: YINV'; '14: YSLL';	2
[LIVFM]x(2,3)[LIVFM]x[LIVFM]	12
		lcl|NC_045512.2_prot_YP_009724389.1_1 [gene=orf1ab] [locus_tag=GU280_gp01] [db_xref=GeneID:43740578] [protein=orf1ab polyprotein] [exception=ribosomal slippage] [protein_id=YP_009724389.1] [location=join(266..13468,13468..21555)] [gbkey=CDS]	'14: VQLSLPV'; '23: VRDVLV'; '111: VGEIPV'; '140: LKSFDL'; '215: LSEQLDF'; '251: LQTPFEI'; '463: IVGDFKL'; '580: LIDAMMF'; '635: FKEGVEF'; '675: VQTFFKL'; '682: VNKFLAL'; '700: LKALNL'; '752: LTEEVVL'; '779: VGTPVCI'; '788: LMLLEI'; '802: LAPNMMV'; '839: VNITFEL'; '889: LLTPLGI'; '1002: IQTIVEV'; '1019: VVQTIEV'; '1028: FSGYLKL'; '1052: VKPTVVV'; '1159: IHSLRV'; '1169: VRTNVYL'; '1187: VSSFLEM'; …	203
		lcl|NC_045512.2_prot_YP_009725295.1_2 [gene=orf1ab] [locus_tag=GU280_gp01] [db_xref=GeneID:43740578] [protein=orf1a polyprotein] [protein_id=YP_009725295.1] [location=266..13483] [gbkey=CDS]	'14: VQLSLPV'; '23: VRDVLV'; '111: VGEIPV'; '140: LKSFDL'; '215: LSEQLDF'; '251: LQTPFEI'; '463: IVGDFKL'; '580: LIDAMMF'; '635: FKEGVEF'; '675: VQTFFKL'; '682: VNKFLAL'; '700: LKALNL'; '752: LTEEVVL'; '779: VGTPVCI'; '788: LMLLEI'; '802: LAPNMMV'; '839: VNITFEL'; '889: LLTPLGI'; '1002: IQTIVEV'; '1019: VVQTIEV'; '1028: FSGYLKL'; '1052: VKPTVVV'; '1159: IHSLRV'; '1169: VRTNVYL'; '1187: VSSFLEM'; …	129
		lcl|NC_045512.2_prot_YP_009724390.1_3 [gene=S] [locus_tag=GU280_gp02] [db_xref=GeneID:43740568] [protein=surface glycoprotein] [protein_id=YP_009724390.1] [location=21563..25384] [gbkey=CDS]	'1: MFVFLVL'; '65: FHAIHV'; '86: FNDGVYF'; '130: VCEFQF'; '153: MESEFRV'; '171: VSQPFLM'; '189: LREFVF'; '197: IDGYFKI'; '223: LEPLVDL'; '238: FQTLLAL'; '303: LKSFTV'; '387: LNDLCF'; '486: FNCYFPL'; '510: VVVLSF'; '582: LEILDI'; '592: FGGVSV'; '693: IAYTMSL'; '714: IPTNFTI'; '726: ILPVSM'; '736: VDCTMYI'; '767: LTGIAV'; '797: FGGFNF'; '817: FIEDLLF'; '855: FNGLTV'; '894: LQIPFAM'; '906: FNGIGV'; …	31
		lcl|NC_045512.2_prot_YP_009724391.1_4 [gene=ORF3a] [locus_tag=GU280_gp03] [db_xref=GeneID:43740569] [protein=ORF3a protein] [protein_id=YP_009724391.1] [location=25393..26220] [gbkey=CDS]	'1: MDLFMRI'; '10: IGTVTL'; '37: IQASLPF'; '46: LIVGVAL'; '73: LSKGVHF'; '80: VCNLLLL'; '90: VYSHLLL'; '108: LYALVYF'; '115: LQSINF'; '121: VRIIMRL'; '163: VTSSIVI'; '197: VKDCVVL'; '225: VEHVTF';	13
		lcl|NC_045512.2_prot_YP_009724392.1_5 [gene=E] [locus_tag=GU280_gp04] [db_xref=GeneID:43740570] [protein=envelope protein] [protein_id=YP_009724392.1] [location=26245..26472] [gbkey=CDS]	'13: IVNSVLL'; '20: FLAFVVF'; '27: LLVTLAI'; '34: LTALRL'; '46: IVNVSL'; '52: VKPSFYV'; '70: VPDLLV';	7
		lcl|NC_045512.2_prot_YP_009724393.1_6 [gene=M] [locus_tag=GU280_gp05] [db_xref=GeneID:43740571] [protein=membrane glycoprotein] [protein_id=YP_009724393.1] [location=26523..27191] [gbkey=CDS]	'22: LVIGFLF'; '29: LTWICL'; '45: FLYIIKL'; '56: LLWPVTL'; '76: ITGGIAI'; '84: MACLVGL'; '96: FIASFRL'; '118: ILLNVPL'; '134: LESELVI'; '145: LRGHLRI'; '164: LPKEITV';	11
		lcl|NC_045512.2_prot_YP_009724394.1_7 [gene=ORF6] [locus_tag=GU280_gp06] [db_xref=GeneID:43740572] [protein=ORF6 protein] [protein_id=YP_009724394.1] [location=27202..27387] [gbkey=CDS]	'1: MFHLVDF'; '11: IAEILLI'; '18: IMRTFKV'; '29: LDYIINL';	4
		lcl|NC_045512.2_prot_YP_009724395.1_8 [gene=ORF7a] [locus_tag=GU280_gp07] [db_xref=GeneID:43740573] [protein=ORF7a protein] [protein_id=YP_009724395.1] [location=27394..27759] [gbkey=CDS]	'1: MKIILFL'; '59: FSTQFAF'; '82: VSPKLFI'; '96: LYSPIFL'; '103: IVAAIVF'; '110: ITLCFTL';	6
		lcl|NC_045512.2_prot_YP_009725318.1_9 [gene=ORF7b] [locus_tag=GU280_gp08] [db_xref=GeneID:43740574] [protein=ORF7b] [protein_id=YP_009725318.1] [location=27756..27887] [gbkey=CDS]	'1: MIELSL'; '7: IDFYLCF'; '14: LAFLLFL'; '21: VLIMLII'; '28: FWFSLEL';	5
		lcl|NC_045512.2_prot_YP_009724396.1_10 [gene=ORF8] [locus_tag=GU280_gp09] [db_xref=GeneID:43740577] [protein=ORF8 protein] [protein_id=YP_009724396.1] [location=27894..28259] [gbkey=CDS]	'1: MKFLVFL'; '57: LIELCV'; '71: IQYIDI'; '81: VSCLPF'; '95: LGSLVV'; '114: VRVVLDF';	6
		lcl|NC_045512.2_prot_YP_009724397.2_11 [gene=N] [locus_tag=GU280_gp10] [db_xref=GeneID:43740575] [protein=nucleocapsid phosphoprotein] [protein_id=YP_009724397.2] [location=28274..29533] [gbkey=CDS]	'219: LALLLL'; '317: MSRIGM'; '346: FKDQVIL';	3
		lcl|NC_045512.2_prot_YP_009725255.1_12 [gene=ORF10] [locus_tag=GU280_gp11] [db_xref=GeneID:43740576] [protein=ORF10 protein] [protein_id=YP_009725255.1] [location=29558..29674] [gbkey=CDS]	'1: MGYINV'; '7: FAFPFTI'; '27: IAQVDV';	3
KRx(10,12)K[KR][KR]	0
KRx(10,12)K[KR]X[KR]	0
K[KR]RK	0
KR[KR]R	0
[PR]xxKR{DE}[KR]	0
KRx[WFY]xxAF	0
[RP]xxKR[KR]{DE}	0
LGKR[KR][WFY]	0
KRxR	2
		lcl|NC_045512.2_prot_YP_009724389.1_1 [gene=orf1ab] [locus_tag=GU280_gp01] [db_xref=GeneID:43740578] [protein=orf1ab polyprotein] [exception=ribosomal slippage] [protein_id=YP_009724389.1] [location=join(266..13468,13468..21555)] [gbkey=CDS]	'2414: KRNR';	1
		lcl|NC_045512.2_prot_YP_009725295.1_2 [gene=orf1ab] [locus_tag=GU280_gp01] [db_xref=GeneID:43740578] [protein=orf1a polyprotein] [protein_id=YP_009725295.1] [location=266..13483] [gbkey=CDS]	'2414: KRNR';	1
RKRP	0
[ST]x[VIL]	12
		lcl|NC_045512.2_prot_YP_009724389.1_1 [gene=orf1ab] [locus_tag=GU280_gp01] [db_xref=GeneID:43740578] [protein=orf1ab polyprotein] [exception=ribosomal slippage] [protein_id=YP_009724389.1] [location=join(266..13468,13468..21555)] [gbkey=CDS]	'3: SLV'; '12: THV'; '167: SGV'; '279: SII'; '318: STL'; '376: SEV'; '391: SGL'; '395: TIL'; '412: SYV'; '436: TGV'; '528: SIL'; '531: SPL'; '568: TIL'; '588: SDL'; '614: TNI'; '692: SII'; '708: TFV'; '727: TGL'; '749: TEV'; '781: TPV'; '821: TKV'; '829: TVI'; '866: TEV'; '887: SEL'; '891: TPL'; '1000: TTI'; '1004: TIV'; '1017: TPV'; '1055: TVV'; '1102: SCV'; '1171: TNV'; '1189: SFL'; '1241: TTL'…	221
		lcl|NC_045512.2_prot_YP_009725295.1_2 [gene=orf1ab] [locus_tag=GU280_gp01] [db_xref=GeneID:43740578] [protein=orf1a polyprotein] [protein_id=YP_009725295.1] [location=266..13483] [gbkey=CDS]	'3: SLV'; '12: THV'; '167: SGV'; '279: SII'; '318: STL'; '376: SEV'; '391: SGL'; '395: TIL'; '412: SYV'; '436: TGV'; '528: SIL'; '531: SPL'; '568: TIL'; '588: SDL'; '614: TNI'; '692: SII'; '708: TFV'; '727: TGL'; '749: TEV'; '781: TPV'; '821: TKV'; '829: TVI'; '866: TEV'; '887: SEL'; '891: TPL'; '1000: TTI'; '1004: TIV'; '1017: TPV'; '1055: TVV'; '1102: SCV'; '1171: TNV'; '1189: SFL'; '1241: TTL'…	152
		lcl|NC_045512.2_prot_YP_009724390.1_3 [gene=S] [locus_tag=GU280_gp02] [db_xref=GeneID:43740568] [protein=surface glycoprotein] [protein_id=YP_009724390.1] [location=21563..25384] [gbkey=CDS]	'22: TQL'; '45: SSV'; '60: SNV'; '98: SNI'; '108: TTL'; '116: SLL'; '124: TNV'; '208: TPI'; '221: SAL'; '240: TLL'; '247: SYL'; '274: TFL'; '325: SIV'; '333: TNL'; '366: SVL'; '385: TKL'; '393: TNV'; '399: SFV'; '443: SKV'; '459: SNL'; '470: TEI'; '531: TNL'; '549: TGV'; '596: SVI'; '618: TEV'; '640: SNV'; '691: SII'; '724: TEI'; '734: TSV'; '750: SNL'; '761: TQL'; '768: TGI'; '803: SQI'; '816: S…	48
		lcl|NC_045512.2_prot_YP_009724391.1_4 [gene=ORF3a] [locus_tag=GU280_gp03] [db_xref=GeneID:43740569] [protein=ORF3a protein] [protein_id=YP_009724391.1] [location=25393..26220] [gbkey=CDS]	'60: SKI'; '92: SHL'; '165: SSI'; '177: SPI'; '195: SGV'; '217: TQL'; '223: TGV'; '253: SGV'; '271: TSV';	9
		lcl|NC_045512.2_prot_YP_009724392.1_5 [gene=E] [locus_tag=GU280_gp04] [db_xref=GeneID:43740570] [protein=envelope protein] [protein_id=YP_009724392.1] [location=26245..26472] [gbkey=CDS]	'3: SFV'; '11: TLI'; '16: SVL'; '35: TAL'; '50: SLV'; '60: SRV'; '68: SRV';	7
		lcl|NC_045512.2_prot_YP_009724393.1_6 [gene=M] [locus_tag=GU280_gp05] [db_xref=GeneID:43740571] [protein=membrane glycoprotein] [protein_id=YP_009724393.1] [location=26523..27191] [gbkey=CDS]	'30: TWI'; '116: TNI'; '127: TIL'; '136: SEL';	4
		lcl|NC_045512.2_prot_YP_009724394.1_7 [gene=ORF6] [locus_tag=GU280_gp06] [db_xref=GeneID:43740572] [protein=ORF6 protein] [protein_id=YP_009724394.1] [location=27202..27387] [gbkey=CDS]	'50: SQL';	1
		lcl|NC_045512.2_prot_YP_009724395.1_8 [gene=ORF7a] [locus_tag=GU280_gp07] [db_xref=GeneID:43740573] [protein=ORF7a protein] [protein_id=YP_009724395.1] [location=27394..27759] [gbkey=CDS]	'27: TTV'; '98: SPI';	2
		lcl|NC_045512.2_prot_YP_009725318.1_9 [gene=ORF7b] [locus_tag=GU280_gp08] [db_xref=GeneID:43740574] [protein=ORF7b] [protein_id=YP_009725318.1] [location=27756..27887] [gbkey=CDS]	'5: SLI';	1
		lcl|NC_045512.2_prot_YP_009724396.1_10 [gene=ORF8] [locus_tag=GU280_gp09] [db_xref=GeneID:43740577] [protein=ORF8 protein] [protein_id=YP_009724396.1] [location=27894..28259] [gbkey=CDS]	'11: TTV'; '69: SPI'; '82: SCL'; '97: SLV';	4
		lcl|NC_045512.2_prot_YP_009724397.2_11 [gene=N] [locus_tag=GU280_gp10] [db_xref=GeneID:43740575] [protein=nucleocapsid phosphoprotein] [protein_id=YP_009724397.2] [location=28274..29533] [gbkey=CDS]	'54: TAL'; '165: TTL'; '318: SRI'; '329: TWL'; '393: TLL';	5
		lcl|NC_045512.2_prot_YP_009725255.1_12 [gene=ORF10] [locus_tag=GU280_gp11] [db_xref=GeneID:43740576] [protein=ORF10 protein] [protein_id=YP_009725255.1] [location=29558..29674] [gbkey=CDS]	'15: SLL';	1
x(3)!x(3)!x(3)!x(5)	12
		lcl|NC_045512.2_prot_YP_009724389.1_1 [gene=orf1ab] [locus_tag=GU280_gp01] [db_xref=GeneID:43740578] [protein=orf1ab polyprotein] [exception=ribosomal slippage] [protein_id=YP_009724389.1] [location=join(266..13468,13468..21555)] [gbkey=CDS]	'16: LSLPVLQVRDVLVRGFG'; '35: VEEVLSEARQHLKDGTC'; '53: LVEVEKGVLPQLEQPYV'; '73: RSDARTAPHGHVMVELV'; '94: GIQYGRSGETLGVLVPH'; '111: VGEIPVAYRKVLLRKNG'; '129: KGAGGHSYGADLKSFDL'; '146: GDELGTDPYEDFQENWN'; '166: SSGVTRELMRELNGGAY'; '189: NFCGPDGYPLECIKDLL'; '208: AGKASCTLSEQLDFIDT'; '248: SYELQTPFEIKLAKKFD'; '270: CPNFVFPLNSIIKTIQP'; '293: LDGFMGRIRSVYPVASP'; '320: LMKCDHCGETSWQTGDF'; '338: KATCEFCG…	303
		lcl|NC_045512.2_prot_YP_009725295.1_2 [gene=orf1ab] [locus_tag=GU280_gp01] [db_xref=GeneID:43740578] [protein=orf1a polyprotein] [protein_id=YP_009725295.1] [location=266..13483] [gbkey=CDS]	'16: LSLPVLQVRDVLVRGFG'; '35: VEEVLSEARQHLKDGTC'; '53: LVEVEKGVLPQLEQPYV'; '73: RSDARTAPHGHVMVELV'; '94: GIQYGRSGETLGVLVPH'; '111: VGEIPVAYRKVLLRKNG'; '129: KGAGGHSYGADLKSFDL'; '146: GDELGTDPYEDFQENWN'; '166: SSGVTRELMRELNGGAY'; '189: NFCGPDGYPLECIKDLL'; '208: AGKASCTLSEQLDFIDT'; '248: SYELQTPFEIKLAKKFD'; '270: CPNFVFPLNSIIKTIQP'; '293: LDGFMGRIRSVYPVASP'; '320: LMKCDHCGETSWQTGDF'; '338: KATCEFCG…	190
		lcl|NC_045512.2_prot_YP_009724390.1_3 [gene=S] [locus_tag=GU280_gp02] [db_xref=GeneID:43740568] [protein=surface glycoprotein] [protein_id=YP_009724390.1] [location=21563..25384] [gbkey=CDS]	'4: FLVLLPLVSSQCVNLTT'; '21: RTQLPPAYTNSFTRGVY'; '51: TQDLFLPFFSNVTWFHA'; '72: GTNGTKRFDNPVLPFND'; '116: SLLIVNNATNVVIKVCE'; '133: FQFCNDPFLGVYYHKNN'; '163: ANNCTFEYVSQPFLMDL'; '186: FKNLREFVFKNIDGYFK'; '206: KHTPINLVRDLPQGFSA'; '224: EPLVDLPIGINITRFQT'; '241: LLALHRSYLTPGDSSSG'; '258: WTAGAAAYYVGYLQPRT'; '282: NGTITDAVDCALDPLSE'; '315: TSNFRVQPTESIVRFPN'; '341: VFNATRFASVYAWNRKR'; '358: ISNCVADY…	54
		lcl|NC_045512.2_prot_YP_009724391.1_4 [gene=ORF3a] [locus_tag=GU280_gp03] [db_xref=GeneID:43740569] [protein=ORF3a protein] [protein_id=YP_009724391.1] [location=25393..26220] [gbkey=CDS]	'4: FMRIFTIGTVTLKQGEI'; '22: DATPSDFVRATATIPIQ'; '39: ASLPFGWLIVGVALLAV'; '62: IITLKKRWQLALSKGVH'; '80: VCNLLLLFVTVYSHLLL'; '97: VAAGLEAPFLYLYALVY'; '117: SINFVRIIMRLWLCWKC'; '136: KNPLLYDANYFLCWHTN'; '156: YCIPYNSVTSSIVITSG'; '186: IGGYTEKWESGVKDCVV'; '204: HSYFTSDYYQLYSTQLS'; '221: TDTGVEHVTFFIYNKIV'; '248: TIDGSSGVVNPVMEPIY';	13
		lcl|NC_045512.2_prot_YP_009724392.1_5 [gene=E] [locus_tag=GU280_gp04] [db_xref=GeneID:43740570] [protein=envelope protein] [protein_id=YP_009724392.1] [location=26245..26472] [gbkey=CDS]	'7: EETGTLIVNSVLLFLAF'; '25: VFLLVTLAILTALRLCA'; '51: LVKPSFYVYSRVKNLNS';	3
		lcl|NC_045512.2_prot_YP_009724393.1_6 [gene=M] [locus_tag=GU280_gp05] [db_xref=GeneID:43740571] [protein=membrane glycoprotein] [protein_id=YP_009724393.1] [location=26523..27191] [gbkey=CDS]	'13: LKKLLEQWNLVIGFLFL'; '42: RNRFLYIIKLIFLWLLW'; '59: PVTLACFVLAAVYRINW'; '76: ITGGIAIAMACLVGLMW'; '93: LSYFIASFRLFARTRSM'; '111: SFNPETNILLNVPLHGT'; '131: RPLLESELVIGAVILRG'; '150: RIAGHHLGRCDIKDLPK'; '176: LSYYKLGASQRVAGDSG';	9
		lcl|NC_045512.2_prot_YP_009724394.1_7 [gene=ORF6] [locus_tag=GU280_gp06] [db_xref=GeneID:43740572] [protein=ORF6 protein] [protein_id=YP_009724394.1] [location=27202..27387] [gbkey=CDS]	'4: LVDFQVTIAEILLIIMR'; '24: VSIWNLDYIINLIIKNL';	2
		lcl|NC_045512.2_prot_YP_009724395.1_8 [gene=ORF7a] [locus_tag=GU280_gp07] [db_xref=GeneID:43740573] [protein=ORF7a protein] [protein_id=YP_009724395.1] [location=27394..27759] [gbkey=CDS]	'1: MKIILFLALITLATCEL'; '23: CVRGTTVLLKEPCSSGT'; '43: NSPFHPLADNKFALTCF'; '60: STQFAFACPDGVKHVYQ'; '90: QEEVQELYSPIFLIVAA';	5
		lcl|NC_045512.2_prot_YP_009725318.1_9 [gene=ORF7b] [locus_tag=GU280_gp08] [db_xref=GeneID:43740574] [protein=ORF7b] [protein_id=YP_009725318.1] [location=27756..27887] [gbkey=CDS]	'3: ELSLIDFYLCFLAFLLF'; '21: VLIMLIIFWFSLELQDH';	2
		lcl|NC_045512.2_prot_YP_009724396.1_10 [gene=ORF8] [locus_tag=GU280_gp09] [db_xref=GeneID:43740577] [protein=ORF8 protein] [protein_id=YP_009724396.1] [location=27894..28259] [gbkey=CDS]	'2: KFLVFLGIITTVAAFHQ'; '30: PYVVDDPCPIHFYSKWY'; '54: SAPLIELCVDEAGSKSP'; '74: IDIGNYTVSCLPFTINC'; '93: PKLGSLVVRCSFYEDFL';	5
		lcl|NC_045512.2_prot_YP_009724397.2_11 [gene=N] [locus_tag=GU280_gp10] [db_xref=GeneID:43740575] [protein=nucleocapsid phosphoprotein] [protein_id=YP_009724397.2] [location=28274..29533] [gbkey=CDS]	'39: QRRPQGLPNNTASWFTA'; '83: QIGYYRRATRRIRGGDG'; '101: MKDLSPRWYFYYLGTGP'; '118: EAGLPYGANKDGIIWVA'; '135: TEGALNTPKDHIGTRNP'; '161: LPQGTTLPKGFYAEGSR'; '197: STPGSSRGTSPARMAGN'; '216: DAALALLLLDRLNQLES'; '267: AYNVTQAFGRRGPEQTQ'; '284: GNFGDQELIRQGTDYKH'; '302: PQIAQFAPSASAFFGMS'; '319: RIGMEVTPSGTWLTYTG'; '357: IDAYKTFPPTEPKKDKK'; '389: QQTVTLLPAADLDDFSK';	14
		lcl|NC_045512.2_prot_YP_009725255.1_12 [gene=ORF10] [locus_tag=GU280_gp11] [db_xref=GeneID:43740576] [protein=ORF10 protein] [protein_id=YP_009725255.1] [location=29558..29674] [gbkey=CDS]	'3: YINVFAFPFTIYSLLLC';	1
x(3)[FILV]x(3)[FILV]x(3)[FILV]x(5)	12
		lcl|NC_045512.2_prot_YP_009724389.1_1 [gene=orf1ab] [locus_tag=GU280_gp01] [db_xref=GeneID:43740578] [protein=orf1ab polyprotein] [exception=ribosomal slippage] [protein_id=YP_009724389.1] [location=join(266..13468,13468..21555)] [gbkey=CDS]	'20: VLQVRDVLVRGFGDSVE'; '53: LVEVEKGVLPQLEQPYV'; '81: HGHVMVELVAELEGIQY'; '166: SSGVTRELMRELNGGAY'; '248: SYELQTPFEIKLAKKFD'; '270: CPNFVFPLNSIIKTIQP'; '403: TIAFGGCVFSYVGCHNK'; '443: SEGLNDNLLEILQKEKV'; '466: DFKLNEEIAIILASFSA'; '541: ARVVRSIFSRTLETAQN'; '594: NLVVMAYITGGVVQLTS'; '613: LTNIFGTVYEKLKPVLD'; '668: AKEIKESVQTFFKLVNK'; '838: SVNITFELDERIDKVLN'; '868: VNEFACVVADAVIKTLQ'; '886: VSELLT…	94
		lcl|NC_045512.2_prot_YP_009725295.1_2 [gene=orf1ab] [locus_tag=GU280_gp01] [db_xref=GeneID:43740578] [protein=orf1a polyprotein] [protein_id=YP_009725295.1] [location=266..13483] [gbkey=CDS]	'20: VLQVRDVLVRGFGDSVE'; '53: LVEVEKGVLPQLEQPYV'; '81: HGHVMVELVAELEGIQY'; '166: SSGVTRELMRELNGGAY'; '248: SYELQTPFEIKLAKKFD'; '270: CPNFVFPLNSIIKTIQP'; '403: TIAFGGCVFSYVGCHNK'; '443: SEGLNDNLLEILQKEKV'; '466: DFKLNEEIAIILASFSA'; '541: ARVVRSIFSRTLETAQN'; '594: NLVVMAYITGGVVQLTS'; '613: LTNIFGTVYEKLKPVLD'; '668: AKEIKESVQTFFKLVNK'; '838: SVNITFELDERIDKVLN'; '868: VNEFACVVADAVIKTLQ'; '886: VSELLT…	59
		lcl|NC_045512.2_prot_YP_009724390.1_3 [gene=S] [locus_tag=GU280_gp02] [db_xref=GeneID:43740568] [protein=surface glycoprotein] [protein_id=YP_009724390.1] [location=21563..25384] [gbkey=CDS]	'51: TQDLFLPFFSNVTWFHA'; '168: FEYVSQPFLMDLEGKQG'; '186: FKNLREFVFKNIDGYFK'; '209: PINLVRDLPQGFSALEP'; '282: NGTITDAVDCALDPLSE'; '422: NYKLPDDFTGCVIAWNS'; '461: LKPFERDISTEIYQAGS'; '711: SIAIPTNFTISVTTEIL'; '756: YGSFCTQLNRALTGIAV'; '815: RSFIEDLLFNKVTLADA'; '920: QKLIANQFNSAIGKIQD'; '959: LNTLVKQLSSNFGAISS'; '990: EVQIDRLITGRLQSLQT'; '1126: CDVVIGIVNNTVYDPLQ'; '1145: LDSFKEELDKYFKNHTS'; '1186: L…	17
		lcl|NC_045512.2_prot_YP_009724391.1_4 [gene=ORF3a] [locus_tag=GU280_gp03] [db_xref=GeneID:43740569] [protein=ORF3a protein] [protein_id=YP_009724391.1] [location=25393..26220] [gbkey=CDS]	'45: WLIVGVALLAVFQSASK'; '76: GVHFVCNLLLLFVTVYS'; '94: LLLVAAGLEAPFLYLYA'; '225: VEHVTFFIYNKIVDEPE'; '252: SSGVVNPVMEPIYDEPT';	5
		lcl|NC_045512.2_prot_YP_009724392.1_5 [gene=E] [locus_tag=GU280_gp04] [db_xref=GeneID:43740570] [protein=envelope protein] [protein_id=YP_009724392.1] [location=26245..26472] [gbkey=CDS]	'10: GTLIVNSVLLFLAFVVF';	1
		lcl|NC_045512.2_prot_YP_009724393.1_6 [gene=M] [locus_tag=GU280_gp05] [db_xref=GeneID:43740571] [protein=membrane glycoprotein] [protein_id=YP_009724393.1] [location=26523..27191] [gbkey=CDS]	'21: NLVIGFLFLTWICLLQF'; '42: RNRFLYIIKLIFLWLLW'; '59: PVTLACFVLAAVYRINW'; '117: NILLNVPLHGTILTRPL';	4
		lcl|NC_045512.2_prot_YP_009724394.1_7 [gene=ORF6] [locus_tag=GU280_gp06] [db_xref=GeneID:43740572] [protein=ORF6 protein] [protein_id=YP_009724394.1] [location=27202..27387] [gbkey=CDS]	'4: LVDFQVTIAEILLIIMR'; '26: IWNLDYIINLIIKNLSK';	2
		lcl|NC_045512.2_prot_YP_009724395.1_8 [gene=ORF7a] [locus_tag=GU280_gp07] [db_xref=GeneID:43740573] [protein=ORF7a protein] [protein_id=YP_009724395.1] [location=27394..27759] [gbkey=CDS]	'93: VQELYSPIFLIVAAIVF';	1
		lcl|NC_045512.2_prot_YP_009725318.1_9 [gene=ORF7b] [locus_tag=GU280_gp08] [db_xref=GeneID:43740574] [protein=ORF7b] [protein_id=YP_009725318.1] [location=27756..27887] [gbkey=CDS]	'6: LIDFYLCFLAFLLFLVL'; '23: IMLIIFWFSLELQDHNE';	2
		lcl|NC_045512.2_prot_YP_009724396.1_10 [gene=ORF8] [locus_tag=GU280_gp09] [db_xref=GeneID:43740577] [protein=ORF8 protein] [protein_id=YP_009724396.1] [location=27894..28259] [gbkey=CDS]	'2: KFLVFLGIITTVAAFHQ'; '97: SLVVRCSFYEDFLEYHD';	2
		lcl|NC_045512.2_prot_YP_009724397.2_11 [gene=N] [locus_tag=GU280_gp10] [db_xref=GeneID:43740575] [protein=nucleocapsid phosphoprotein] [protein_id=YP_009724397.2] [location=28274..29533] [gbkey=CDS]	'216: DAALALLLLDRLNQLES';	1
		lcl|NC_045512.2_prot_YP_009725255.1_12 [gene=ORF10] [locus_tag=GU280_gp11] [db_xref=GeneID:43740576] [protein=ORF10 protein] [protein_id=YP_009725255.1] [location=29558..29674] [gbkey=CDS]	'6: VFAFPFTIYSLLLCRMN';	1
HxCx[ST]WxS	0
[RHK][STALV]x[ST]x[PESRDIFTQ]	6
		lcl|NC_045512.2_prot_YP_009724389.1_1 [gene=orf1ab] [locus_tag=GU280_gp01] [db_xref=GeneID:43740578] [protein=orf1ab polyprotein] [exception=ribosomal slippage] [protein_id=YP_009724389.1] [location=join(266..13468,13468..21555)] [gbkey=CDS]	'1185: KLVSSF'; '2148: KVVSTT'; '2516: HSLSHF'; '2974: RVVTTF'; '3854: KVATVQ'; '3880: RVESSS'; '4301: HTGTGQ'; '4641: RALTAE'; '5357: HVISTS'; '6193: HVASCD'; '6394: KSATCI'; '6450: RLQSLE'; '6796: KLQSSQ';	13
		lcl|NC_045512.2_prot_YP_009725295.1_2 [gene=orf1ab] [locus_tag=GU280_gp01] [db_xref=GeneID:43740578] [protein=orf1a polyprotein] [protein_id=YP_009725295.1] [location=266..13483] [gbkey=CDS]	'1185: KLVSSF'; '2148: KVVSTT'; '2516: HSLSHF'; '2974: RVVTTF'; '3854: KVATVQ'; '3880: RVESSS'; '4301: HTGTGQ';	7
		lcl|NC_045512.2_prot_YP_009724390.1_3 [gene=S] [locus_tag=GU280_gp02] [db_xref=GeneID:43740568] [protein=surface glycoprotein] [protein_id=YP_009724390.1] [location=21563..25384] [gbkey=CDS]	'304: KSFTVE'; '765: RALTGI'; '995: RLITGR'; '1048: HLMSFP';	4
		lcl|NC_045512.2_prot_YP_009724393.1_6 [gene=M] [locus_tag=GU280_gp05] [db_xref=GeneID:43740571] [protein=membrane glycoprotein] [protein_id=YP_009724393.1] [location=26523..27191] [gbkey=CDS]	'210: HSSSSD';	1
		lcl|NC_045512.2_prot_YP_009724395.1_8 [gene=ORF7a] [locus_tag=GU280_gp07] [db_xref=GeneID:43740573] [protein=ORF7a protein] [protein_id=YP_009724395.1] [location=27394..27759] [gbkey=CDS]	'78: RARSVS';	1
		lcl|NC_045512.2_prot_YP_009724397.2_11 [gene=N] [locus_tag=GU280_gp10] [db_xref=GeneID:43740575] [protein=nucleocapsid phosphoprotein] [protein_id=YP_009724397.2] [location=28274..29533] [gbkey=CDS]	'185: RSSSRS';	1
Rx{P}[ST]{P}P	0
Rxx{P}[ST][IVLM]x	4
		lcl|NC_045512.2_prot_YP_009724389.1_1 [gene=orf1ab] [locus_tag=GU280_gp01] [db_xref=GeneID:43740578] [protein=orf1ab polyprotein] [exception=ribosomal slippage] [protein_id=YP_009724389.1] [location=join(266..13468,13468..21555)] [gbkey=CDS]	'99: RSGETLG'; '542: RVVRSIF'; '1464: RYMRSLK'; '1530: RGDKSVY'; '1563: REVRTIK'; '2189: RIKASMP'; '3394: RPNFTIK'; '3485: RFTTTLN'; '3706: RRVWTLM'; '5023: RIMASLV'; '5142: RKHFSMM'; '5751: RLMKTIG'; '5919: RNVATLQ'; '5977: RRLISMM'; '6214: RVDWTIE';	15
		lcl|NC_045512.2_prot_YP_009725295.1_2 [gene=orf1ab] [locus_tag=GU280_gp01] [db_xref=GeneID:43740578] [protein=orf1a polyprotein] [protein_id=YP_009725295.1] [location=266..13483] [gbkey=CDS]	'99: RSGETLG'; '542: RVVRSIF'; '1464: RYMRSLK'; '1530: RGDKSVY'; '1563: REVRTIK'; '2189: RIKASMP'; '3394: RPNFTIK'; '3485: RFTTTLN'; '3706: RRVWTLM';	9
		lcl|NC_045512.2_prot_YP_009724390.1_3 [gene=S] [locus_tag=GU280_gp02] [db_xref=GeneID:43740568] [protein=surface glycoprotein] [protein_id=YP_009724390.1] [location=21563..25384] [gbkey=CDS]	'577: RDPQTLE'; '682: RRARSVA';	2
		lcl|NC_045512.2_prot_YP_009724391.1_4 [gene=ORF3a] [locus_tag=GU280_gp03] [db_xref=GeneID:43740569] [protein=ORF3a protein] [protein_id=YP_009724391.1] [location=25393..26220] [gbkey=CDS]	'30: RATATIP';	1
Gx(1,2)GxxG	2
		lcl|NC_045512.2_prot_YP_009724389.1_1 [gene=orf1ab] [locus_tag=GU280_gp01] [db_xref=GeneID:43740578] [protein=orf1ab polyprotein] [exception=ribosomal slippage] [protein_id=YP_009724389.1] [location=join(266..13468,13468..21555)] [gbkey=CDS]	'127: GNKGAGG'; '440: GEGSEG'; '1068: GGGVAG'; '1331: GQGLNG'; '3406: GSCGSVG';	5
		lcl|NC_045512.2_prot_YP_009725295.1_2 [gene=orf1ab] [locus_tag=GU280_gp01] [db_xref=GeneID:43740578] [protein=orf1a polyprotein] [protein_id=YP_009725295.1] [location=266..13483] [gbkey=CDS]	'127: GNKGAGG'; '440: GEGSEG'; '1068: GGGVAG'; '1331: GQGLNG'; '3406: GSCGSVG';	5
Gxxx[GA]	6
		lcl|NC_045512.2_prot_YP_009724389.1_1 [gene=orf1ab] [locus_tag=GU280_gp01] [db_xref=GeneID:43740578] [protein=orf1ab polyprotein] [exception=ribosomal slippage] [protein_id=YP_009724389.1] [location=join(266..13468,13468..21555)] [gbkey=CDS]	'94: GIQYG'; '101: GETLG'; '127: GNKGA'; '133: GHSYG'; '146: GDELG'; '401: GRTIA'; '963: GATSA'; '989: GQQDG'; '1068: GGGVA'; '1107: GHNLA'; '1152: GIFGA'; '1294: GVLTA'; '1591: GQQFG'; '1965: GDVVA'; '2265: GYREG'; '3016: GVFCG'; '3050: GGIVA'; '3274: GKVEG'; '3383: GSPSG'; '3433: GVHAG'; '3442: GNFYG'; '3514: GPLSA'; '4240: GMVLG'; '4303: GTGQA'; '4374: GMWKG'; '4405: GVSAA'; '4878: GCINA'; '50…	40
		lcl|NC_045512.2_prot_YP_009725295.1_2 [gene=orf1ab] [locus_tag=GU280_gp01] [db_xref=GeneID:43740578] [protein=orf1a polyprotein] [protein_id=YP_009725295.1] [location=266..13483] [gbkey=CDS]	'94: GIQYG'; '101: GETLG'; '127: GNKGA'; '133: GHSYG'; '146: GDELG'; '401: GRTIA'; '963: GATSA'; '989: GQQDG'; '1068: GGGVA'; '1107: GHNLA'; '1152: GIFGA'; '1294: GVLTA'; '1591: GQQFG'; '1965: GDVVA'; '2265: GYREG'; '3016: GVFCG'; '3050: GGIVA'; '3274: GKVEG'; '3383: GSPSG'; '3433: GVHAG'; '3442: GNFYG'; '3514: GPLSA'; '4240: GMVLG'; '4303: GTGQA'; '4374: GMWKG';	25
		lcl|NC_045512.2_prot_YP_009724390.1_3 [gene=S] [locus_tag=GU280_gp02] [db_xref=GeneID:43740568] [protein=surface glycoprotein] [protein_id=YP_009724390.1] [location=21563..25384] [gbkey=CDS]	'89: GVYFA'; '103: GWIFG'; '257: GWTAG'; '431: GCVIA'; '566: GRDIA'; '648: GCLIG'; '838: GDCLG'; '885: GWTFG'; '1167: GDISG'; '1219: GFIAG';	10
		lcl|NC_045512.2_prot_YP_009724393.1_6 [gene=M] [locus_tag=GU280_gp05] [db_xref=GeneID:43740571] [protein=membrane glycoprotein] [protein_id=YP_009724393.1] [location=26523..27191] [gbkey=CDS]	'79: GIAIA'; '153: GHHLG';	2
		lcl|NC_045512.2_prot_YP_009724395.1_8 [gene=ORF7a] [locus_tag=GU280_gp07] [db_xref=GeneID:43740573] [protein=ORF7a protein] [protein_id=YP_009724395.1] [location=27394..27759] [gbkey=CDS]	'38: GTYEG';	1
		lcl|NC_045512.2_prot_YP_009724397.2_11 [gene=N] [locus_tag=GU280_gp10] [db_xref=GeneID:43740575] [protein=nucleocapsid phosphoprotein] [protein_id=YP_009724397.2] [location=28274..29533] [gbkey=CDS]	'30: GERSG'; '116: GPEAG'; '175: GSRGG'; '200: GSSRG'; '214: GGDAA';	5
GxxxG	6
		lcl|NC_045512.2_prot_YP_009724389.1_1 [gene=orf1ab] [locus_tag=GU280_gp01] [db_xref=GeneID:43740578] [protein=orf1ab polyprotein] [exception=ribosomal slippage] [protein_id=YP_009724389.1] [location=join(266..13468,13468..21555)] [gbkey=CDS]	'94: GIQYG'; '101: GETLG'; '133: GHSYG'; '146: GDELG'; '989: GQQDG'; '1069: GGVAG'; '1591: GQQFG'; '2265: GYREG'; '3016: GVFCG'; '3274: GKVEG'; '3383: GSPSG'; '3433: GVHAG'; '3442: GNFYG'; '4240: GMVLG'; '4374: GMWKG'; '5071: GTSSG'; '5411: GQVFG'; '6035: GFSTG'; '6338: GCDGG'; '6465: GHFDG'; '6577: GRVDG'; '6598: GSVKG'; '6871: GSDKG';	23
		lcl|NC_045512.2_prot_YP_009725295.1_2 [gene=orf1ab] [locus_tag=GU280_gp01] [db_xref=GeneID:43740578] [protein=orf1a polyprotein] [protein_id=YP_009725295.1] [location=266..13483] [gbkey=CDS]	'94: GIQYG'; '101: GETLG'; '133: GHSYG'; '146: GDELG'; '989: GQQDG'; '1069: GGVAG'; '1591: GQQFG'; '2265: GYREG'; '3016: GVFCG'; '3274: GKVEG'; '3383: GSPSG'; '3433: GVHAG'; '3442: GNFYG'; '4240: GMVLG'; '4374: GMWKG';	15
		lcl|NC_045512.2_prot_YP_009724390.1_3 [gene=S] [locus_tag=GU280_gp02] [db_xref=GeneID:43740568] [protein=surface glycoprotein] [protein_id=YP_009724390.1] [location=21563..25384] [gbkey=CDS]	'103: GWIFG'; '257: GWTAG'; '648: GCLIG'; '838: GDCLG'; '885: GWTFG'; '1167: GDISG'; '1219: GFIAG';	7
		lcl|NC_045512.2_prot_YP_009724393.1_6 [gene=M] [locus_tag=GU280_gp05] [db_xref=GeneID:43740571] [protein=membrane glycoprotein] [protein_id=YP_009724393.1] [location=26523..27191] [gbkey=CDS]	'153: GHHLG';	1
		lcl|NC_045512.2_prot_YP_009724395.1_8 [gene=ORF7a] [locus_tag=GU280_gp07] [db_xref=GeneID:43740573] [protein=ORF7a protein] [protein_id=YP_009724395.1] [location=27394..27759] [gbkey=CDS]	'38: GTYEG';	1
		lcl|NC_045512.2_prot_YP_009724397.2_11 [gene=N] [locus_tag=GU280_gp10] [db_xref=GeneID:43740575] [protein=nucleocapsid phosphoprotein] [protein_id=YP_009724397.2] [location=28274..29533] [gbkey=CDS]	'30: GERSG'; '116: GPEAG'; '175: GSRGG'; '200: GSSRG';	4
CxxxC	5
		lcl|NC_045512.2_prot_YP_009724389.1_1 [gene=orf1ab] [locus_tag=GU280_gp01] [db_xref=GeneID:43740578] [protein=orf1ab polyprotein] [exception=ribosomal slippage] [protein_id=YP_009724389.1] [location=join(266..13468,13468..21555)] [gbkey=CDS]	'312: CNQMC'; '416: CHNKC'; '2455: CDTFC'; '3419: CVSFC'; '3762: CVEYC'; '4326: CCLYC'; '4698: CILHC'; '5350: CCKCC'; '6398: CITRC';	9
		lcl|NC_045512.2_prot_YP_009725295.1_2 [gene=orf1ab] [locus_tag=GU280_gp01] [db_xref=GeneID:43740578] [protein=orf1a polyprotein] [protein_id=YP_009725295.1] [location=266..13483] [gbkey=CDS]	'312: CNQMC'; '416: CHNKC'; '2455: CDTFC'; '3419: CVSFC'; '3762: CVEYC'; '4326: CCLYC';	6
		lcl|NC_045512.2_prot_YP_009724390.1_3 [gene=S] [locus_tag=GU280_gp02] [db_xref=GeneID:43740568] [protein=surface glycoprotein] [protein_id=YP_009724390.1] [location=21563..25384] [gbkey=CDS]	'1236: CMTSC'; '1243: CLKGC'; '1250: CGSCC';	3
		lcl|NC_045512.2_prot_YP_009724391.1_4 [gene=ORF3a] [locus_tag=GU280_gp03] [db_xref=GeneID:43740569] [protein=ORF3a protein] [protein_id=YP_009724391.1] [location=25393..26220] [gbkey=CDS]	'153: CYDYC';	1
		lcl|NC_045512.2_prot_YP_009724392.1_5 [gene=E] [locus_tag=GU280_gp04] [db_xref=GeneID:43740570] [protein=envelope protein] [protein_id=YP_009724392.1] [location=26245..26472] [gbkey=CDS]	'40: CAYCC';	1
CxxC	5
		lcl|NC_045512.2_prot_YP_009724389.1_1 [gene=orf1ab] [locus_tag=GU280_gp01] [db_xref=GeneID:43740578] [protein=orf1ab polyprotein] [exception=ribosomal slippage] [protein_id=YP_009724389.1] [location=join(266..13468,13468..21555)] [gbkey=CDS]	'323: CDHC'; '341: CEFC'; '370: CPAC'; '1752: CKTC'; '2009: CIRC'; '2288: CSVC'; '2409: CMMC'; '2452: CVNC'; '2691: CIDC'; '4327: CLYC'; '4370: CTVC'; '4690: CVNC'; '5329: CVLC'; '5340: CGAC'; '5350: CCKC'; '5765: CRRC'; '6132: CCLC';	17
		lcl|NC_045512.2_prot_YP_009725295.1_2 [gene=orf1ab] [locus_tag=GU280_gp01] [db_xref=GeneID:43740578] [protein=orf1a polyprotein] [protein_id=YP_009725295.1] [location=266..13483] [gbkey=CDS]	'323: CDHC'; '341: CEFC'; '370: CPAC'; '1752: CKTC'; '2009: CIRC'; '2288: CSVC'; '2409: CMMC'; '2452: CVNC'; '2691: CIDC'; '4327: CLYC'; '4370: CTVC';	11
		lcl|NC_045512.2_prot_YP_009724390.1_3 [gene=S] [locus_tag=GU280_gp02] [db_xref=GeneID:43740568] [protein=surface glycoprotein] [protein_id=YP_009724390.1] [location=21563..25384] [gbkey=CDS]	'1240: CCSC'; '1247: CCSC';	2
		lcl|NC_045512.2_prot_YP_009724391.1_4 [gene=ORF3a] [locus_tag=GU280_gp03] [db_xref=GeneID:43740569] [protein=ORF3a protein] [protein_id=YP_009724391.1] [location=25393..26220] [gbkey=CDS]	'130: CWKC';	1
		lcl|NC_045512.2_prot_YP_009724392.1_5 [gene=E] [locus_tag=GU280_gp04] [db_xref=GeneID:43740570] [protein=envelope protein] [protein_id=YP_009724392.1] [location=26245..26472] [gbkey=CDS]	'40: CAYC';	1
PPxY	1
		lcl|NC_045512.2_prot_YP_009724390.1_3 [gene=S] [locus_tag=GU280_gp02] [db_xref=GeneID:43740568] [protein=surface glycoprotein] [protein_id=YP_009724390.1] [location=21563..25384] [gbkey=CDS]	'25: PPAY';	1
HxxxW	2
		lcl|NC_045512.2_prot_YP_009724389.1_1 [gene=orf1ab] [locus_tag=GU280_gp01] [db_xref=GeneID:43740578] [protein=orf1ab polyprotein] [exception=ribosomal slippage] [protein_id=YP_009724389.1] [location=join(266..13468,13468..21555)] [gbkey=CDS]	'236: HEIAW'; '1652: HTKKW'; '5005: HLMGW'; '6007: HVRAW'; '6984: HFAWW';	5
		lcl|NC_045512.2_prot_YP_009725295.1_2 [gene=orf1ab] [locus_tag=GU280_gp01] [db_xref=GeneID:43740578] [protein=orf1a polyprotein] [protein_id=YP_009725295.1] [location=266..13483] [gbkey=CDS]	'236: HEIAW'; '1652: HTKKW';	2
GKYLQRRLQ	0
P[TS]AP	0
YxxL	7
		lcl|NC_045512.2_prot_YP_009724389.1_1 [gene=orf1ab] [locus_tag=GU280_gp01] [db_xref=GeneID:43740578] [protein=orf1ab polyprotein] [exception=ribosomal slippage] [protein_id=YP_009724389.1] [location=join(266..13468,13468..21555)] [gbkey=CDS]	'621: YEKL'; '799: YCAL'; '1031: YLKL'; '1183: YDKL'; '2301: YPSL'; '2561: YSQL'; '2945: YESL'; '3011: YRSL'; '3098: YSFL'; '3109: YLYL'; '3190: YLKL'; '3207: YLAL'; '3317: YEDL'; '3502: YEPL'; '3783: YCFL'; '3793: YFGL'; '3803: YFRL'; '3811: YDYL'; '4206: YTEL'; '4479: YNLL'; '4567: YANL'; '4629: YYSL'; '5120: YECL'; '5138: YAYL'; '5218: YVYL'; '5548: YFVL'; '5577: YPTL'; '5601: YSTL'; '5906: YD…	34
		lcl|NC_045512.2_prot_YP_009725295.1_2 [gene=orf1ab] [locus_tag=GU280_gp01] [db_xref=GeneID:43740578] [protein=orf1a polyprotein] [protein_id=YP_009725295.1] [location=266..13483] [gbkey=CDS]	'621: YEKL'; '799: YCAL'; '1031: YLKL'; '1183: YDKL'; '2301: YPSL'; '2561: YSQL'; '2945: YESL'; '3011: YRSL'; '3098: YSFL'; '3109: YLYL'; '3190: YLKL'; '3207: YLAL'; '3317: YEDL'; '3502: YEPL'; '3783: YCFL'; '3793: YFGL'; '3803: YFRL'; '3811: YDYL'; '4206: YTEL';	19
		lcl|NC_045512.2_prot_YP_009724390.1_3 [gene=S] [locus_tag=GU280_gp02] [db_xref=GeneID:43740568] [protein=surface glycoprotein] [protein_id=YP_009724390.1] [location=21563..25384] [gbkey=CDS]	'365: YSVL'; '449: YNYL'; '489: YFPL'; '1138: YDPL'; '1215: YIWL';	5
		lcl|NC_045512.2_prot_YP_009724391.1_4 [gene=ORF3a] [locus_tag=GU280_gp03] [db_xref=GeneID:43740569] [protein=ORF3a protein] [protein_id=YP_009724391.1] [location=25393..26220] [gbkey=CDS]	'91: YSHL'; '211: YYQL';	2
		lcl|NC_045512.2_prot_YP_009724393.1_6 [gene=M] [locus_tag=GU280_gp05] [db_xref=GeneID:43740571] [protein=membrane glycoprotein] [protein_id=YP_009724393.1] [location=26523..27191] [gbkey=CDS]	'178: YYKL';	1
		lcl|NC_045512.2_prot_YP_009724394.1_7 [gene=ORF6] [locus_tag=GU280_gp06] [db_xref=GeneID:43740572] [protein=ORF6 protein] [protein_id=YP_009724394.1] [location=27202..27387] [gbkey=CDS]	'49: YSQL';	1
		lcl|NC_045512.2_prot_YP_009725255.1_12 [gene=ORF10] [locus_tag=GU280_gp11] [db_xref=GeneID:43740576] [protein=ORF10 protein] [protein_id=YP_009725255.1] [location=29558..29674] [gbkey=CDS]	'14: YSLL';	1
LYPxL	1
		lcl|NC_045512.2_prot_YP_009724389.1_1 [gene=orf1ab] [locus_tag=GU280_gp01] [db_xref=GeneID:43740578] [protein=orf1ab polyprotein] [exception=ribosomal slippage] [protein_id=YP_009724389.1] [location=join(266..13468,13468..21555)] [gbkey=CDS]	'5576: LYPTL';	1
RxxK	5
		lcl|NC_045512.2_prot_YP_009724389.1_1 [gene=orf1ab] [locus_tag=GU280_gp01] [db_xref=GeneID:43740578] [protein=orf1ab polyprotein] [exception=ribosomal slippage] [protein_id=YP_009724389.1] [location=join(266..13468,13468..21555)] [gbkey=CDS]	'207: RAGK'; '244: RSEK'; '287: RVEK'; '848: RIDK'; '1404: RKYK'; '1467: RSLK'; '1530: RGDK'; '1566: RTIK'; '1953: RELK'; '3574: RTIK'; '4195: RFPK'; '4510: RLTK'; '4677: RYFK'; '5510: RVTK'; '5751: RLMK'; '6513: RNIK';	16
		lcl|NC_045512.2_prot_YP_009725295.1_2 [gene=orf1ab] [locus_tag=GU280_gp01] [db_xref=GeneID:43740578] [protein=orf1a polyprotein] [protein_id=YP_009725295.1] [location=266..13483] [gbkey=CDS]	'207: RAGK'; '244: RSEK'; '287: RVEK'; '848: RIDK'; '1404: RKYK'; '1467: RSLK'; '1530: RGDK'; '1566: RTIK'; '1953: RELK'; '3574: RTIK'; '4195: RFPK';	11
		lcl|NC_045512.2_prot_YP_009724390.1_3 [gene=S] [locus_tag=GU280_gp02] [db_xref=GeneID:43740568] [protein=surface glycoprotein] [protein_id=YP_009724390.1] [location=21563..25384] [gbkey=CDS]	'983: RLDK';	1
		lcl|NC_045512.2_prot_YP_009724394.1_7 [gene=ORF6] [locus_tag=GU280_gp06] [db_xref=GeneID:43740572] [protein=ORF6 protein] [protein_id=YP_009724394.1] [location=27202..27387] [gbkey=CDS]	'20: RTFK';	1
		lcl|NC_045512.2_prot_YP_009724397.2_11 [gene=N] [locus_tag=GU280_gp10] [db_xref=GeneID:43740575] [protein=nucleocapsid phosphoprotein] [protein_id=YP_009724397.2] [location=28274..29533] [gbkey=CDS]	'385: RQKK';	1
LGxGxxIxW	0
PPLP	0
SLxYLA	0
T[QDE]x(5)ADx(2)[IL]	0
VxHxMY	0
Rx[LC]	5
		lcl|NC_045512.2_prot_YP_009724389.1_1 [gene=orf1ab] [locus_tag=GU280_gp01] [db_xref=GeneID:43740578] [protein=orf1ab polyprotein] [exception=ribosomal slippage] [protein_id=YP_009724389.1] [location=join(266..13468,13468..21555)] [gbkey=CDS]	'171: REL'; '175: REL'; '550: RTL'; '560: RVL'; '718: RKC'; '1163: RVC'; '1386: RKL'; '1467: RSL'; '1746: RVL'; '1953: REL'; '2011: RCL'; '2115: RVL'; '2159: RCL'; '2163: RVC'; '2471: RDL'; '2686: RDL'; '3012: RSL'; '3206: RYL'; '3561: RQC'; '3999: RKL'; '4038: RKL'; '4402: RVC'; '4641: RAL'; '4741: REL'; '4859: RQL'; '5113: RNL'; '5228: RIL'; '5281: RKL'; '5485: REL'; '5733: RTL'; '5766: RRC'; '…	38
		lcl|NC_045512.2_prot_YP_009725295.1_2 [gene=orf1ab] [locus_tag=GU280_gp01] [db_xref=GeneID:43740578] [protein=orf1a polyprotein] [protein_id=YP_009725295.1] [location=266..13483] [gbkey=CDS]	'171: REL'; '175: REL'; '550: RTL'; '560: RVL'; '718: RKC'; '1163: RVC'; '1386: RKL'; '1467: RSL'; '1746: RVL'; '1953: REL'; '2011: RCL'; '2115: RVL'; '2159: RCL'; '2163: RVC'; '2471: RDL'; '2686: RDL'; '3012: RSL'; '3206: RYL'; '3561: RQC'; '3999: RKL'; '4038: RKL';	21
		lcl|NC_045512.2_prot_YP_009724390.1_3 [gene=S] [locus_tag=GU280_gp02] [db_xref=GeneID:43740568] [protein=surface glycoprotein] [protein_id=YP_009724390.1] [location=21563..25384] [gbkey=CDS]	'214: RDL'; '765: RAL'; '847: RDL';	3
		lcl|NC_045512.2_prot_YP_009724392.1_5 [gene=E] [locus_tag=GU280_gp04] [db_xref=GeneID:43740570] [protein=envelope protein] [protein_id=YP_009724392.1] [location=26245..26472] [gbkey=CDS]	'38: RLC';	1
		lcl|NC_045512.2_prot_YP_009724393.1_6 [gene=M] [locus_tag=GU280_gp05] [db_xref=GeneID:43740571] [protein=membrane glycoprotein] [protein_id=YP_009724393.1] [location=26523..27191] [gbkey=CDS]	'44: RFL'; '131: RPL'; '174: RTL';	3
RxL!	4
		lcl|NC_045512.2_prot_YP_009724389.1_1 [gene=orf1ab] [locus_tag=GU280_gp01] [db_xref=GeneID:43740578] [protein=orf1ab polyprotein] [exception=ribosomal slippage] [protein_id=YP_009724389.1] [location=join(266..13468,13468..21555)] [gbkey=CDS]	'171: RELM'; '1386: RKLM'; '2011: RCLW'; '2115: RVLG'; '2686: RDLG'; '3012: RSLP'; '3206: RYLA'; '4741: RELG'; '4859: RQLL'; '5228: RILG'; '5733: RTLL'; '5903: RDLY'; '5977: RRLI'; '6203: RCLA'; '6817: RMLL';	15
		lcl|NC_045512.2_prot_YP_009725295.1_2 [gene=orf1ab] [locus_tag=GU280_gp01] [db_xref=GeneID:43740578] [protein=orf1a polyprotein] [protein_id=YP_009725295.1] [location=266..13483] [gbkey=CDS]	'171: RELM'; '1386: RKLM'; '2011: RCLW'; '2115: RVLG'; '2686: RDLG'; '3012: RSLP'; '3206: RYLA';	7
		lcl|NC_045512.2_prot_YP_009724390.1_3 [gene=S] [locus_tag=GU280_gp02] [db_xref=GeneID:43740568] [protein=surface glycoprotein] [protein_id=YP_009724390.1] [location=21563..25384] [gbkey=CDS]	'214: RDLP'; '847: RDLI';	2
		lcl|NC_045512.2_prot_YP_009724393.1_6 [gene=M] [locus_tag=GU280_gp05] [db_xref=GeneID:43740571] [protein=membrane glycoprotein] [protein_id=YP_009724393.1] [location=26523..27191] [gbkey=CDS]	'44: RFLY'; '131: RPLL';	2
RxL[FILV]	3
		lcl|NC_045512.2_prot_YP_009724389.1_1 [gene=orf1ab] [locus_tag=GU280_gp01] [db_xref=GeneID:43740578] [protein=orf1ab polyprotein] [exception=ribosomal slippage] [protein_id=YP_009724389.1] [location=join(266..13468,13468..21555)] [gbkey=CDS]	'4859: RQLL'; '5733: RTLL'; '5977: RRLI'; '6817: RMLL';	4
		lcl|NC_045512.2_prot_YP_009724390.1_3 [gene=S] [locus_tag=GU280_gp02] [db_xref=GeneID:43740568] [protein=surface glycoprotein] [protein_id=YP_009724390.1] [location=21563..25384] [gbkey=CDS]	'847: RDLI';	1
		lcl|NC_045512.2_prot_YP_009724393.1_6 [gene=M] [locus_tag=GU280_gp05] [db_xref=GeneID:43740571] [protein=membrane glycoprotein] [protein_id=YP_009724393.1] [location=26523..27191] [gbkey=CDS]	'131: RPLL';	1
RxLX!	4
		lcl|NC_045512.2_prot_YP_009724389.1_1 [gene=orf1ab] [locus_tag=GU280_gp01] [db_xref=GeneID:43740578] [protein=orf1ab polyprotein] [exception=ribosomal slippage] [protein_id=YP_009724389.1] [location=join(266..13468,13468..21555)] [gbkey=CDS]	'175: RELNG'; '1386: RKLMP'; '1467: RSLKV'; '1746: RVLNV'; '1953: RELKV'; '2115: RVLGL'; '2471: RDLSL'; '2686: RDLGA'; '3012: RSLPG'; '3206: RYLAL'; '4641: RALTA'; '4741: RELGV'; '4859: RQLLF'; '5228: RILGA'; '5485: RELHL'; '6203: RCLAV';	16
		lcl|NC_045512.2_prot_YP_009725295.1_2 [gene=orf1ab] [locus_tag=GU280_gp01] [db_xref=GeneID:43740578] [protein=orf1a polyprotein] [protein_id=YP_009725295.1] [location=266..13483] [gbkey=CDS]	'175: RELNG'; '1386: RKLMP'; '1467: RSLKV'; '1746: RVLNV'; '1953: RELKV'; '2115: RVLGL'; '2471: RDLSL'; '2686: RDLGA'; '3012: RSLPG'; '3206: RYLAL';	10
		lcl|NC_045512.2_prot_YP_009724390.1_3 [gene=S] [locus_tag=GU280_gp02] [db_xref=GeneID:43740568] [protein=surface glycoprotein] [protein_id=YP_009724390.1] [location=21563..25384] [gbkey=CDS]	'765: RALTG'; '847: RDLIC';	2
		lcl|NC_045512.2_prot_YP_009724393.1_6 [gene=M] [locus_tag=GU280_gp05] [db_xref=GeneID:43740571] [protein=membrane glycoprotein] [protein_id=YP_009724393.1] [location=26523..27191] [gbkey=CDS]	'44: RFLYI'; '174: RTLSY';	2
RxLX[FILV]	3
		lcl|NC_045512.2_prot_YP_009724389.1_1 [gene=orf1ab] [locus_tag=GU280_gp01] [db_xref=GeneID:43740578] [protein=orf1ab polyprotein] [exception=ribosomal slippage] [protein_id=YP_009724389.1] [location=join(266..13468,13468..21555)] [gbkey=CDS]	'1467: RSLKV'; '1746: RVLNV'; '1953: RELKV'; '2115: RVLGL'; '2471: RDLSL'; '3206: RYLAL'; '4741: RELGV'; '4859: RQLLF'; '5485: RELHL'; '6203: RCLAV';	10
		lcl|NC_045512.2_prot_YP_009725295.1_2 [gene=orf1ab] [locus_tag=GU280_gp01] [db_xref=GeneID:43740578] [protein=orf1a polyprotein] [protein_id=YP_009725295.1] [location=266..13483] [gbkey=CDS]	'1467: RSLKV'; '1746: RVLNV'; '1953: RELKV'; '2115: RVLGL'; '2471: RDLSL'; '3206: RYLAL';	6
		lcl|NC_045512.2_prot_YP_009724393.1_6 [gene=M] [locus_tag=GU280_gp05] [db_xref=GeneID:43740571] [protein=membrane glycoprotein] [protein_id=YP_009724393.1] [location=26523..27191] [gbkey=CDS]	'44: RFLYI';	1
CETTG	0
PHQ	0
LPxTG	0
ExxxLV	1
		lcl|NC_045512.2_prot_YP_009724393.1_6 [gene=M] [locus_tag=GU280_gp05] [db_xref=GeneID:43740571] [protein=membrane glycoprotein] [protein_id=YP_009724393.1] [location=26523..27191] [gbkey=CDS]	'18: EQWNLV';	1
!!xSxS[DE][DE][DE]	0
!Kx[DE]	4
		lcl|NC_045512.2_prot_YP_009724389.1_1 [gene=orf1ab] [locus_tag=GU280_gp01] [db_xref=GeneID:43740578] [protein=orf1ab polyprotein] [exception=ribosomal slippage] [protein_id=YP_009724389.1] [location=join(266..13468,13468..21555)] [gbkey=CDS]	'321: MKCD'; '1193: MKSE'; '1207: PKEE'; '1279: LKKD'; '1882: YKLD'; '1894: PKLD'; '1900: YKKD'; '2028: LKSE'; '2314: FKWD'; '3274: GKVE'; '3352: LKVD'; '3987: AKSE'; '4197: PKSD'; '4489: AKHD'; '4658: IKWD'; '4663: LKYD'; '5012: PKCD'; '5240: VKTD'; '5958: FKTE'; '6286: YKIE'; '6540: YKRD'; '6677: YKLE';	22
		lcl|NC_045512.2_prot_YP_009725295.1_2 [gene=orf1ab] [locus_tag=GU280_gp01] [db_xref=GeneID:43740578] [protein=orf1a polyprotein] [protein_id=YP_009725295.1] [location=266..13483] [gbkey=CDS]	'321: MKCD'; '1193: MKSE'; '1207: PKEE'; '1279: LKKD'; '1882: YKLD'; '1894: PKLD'; '1900: YKKD'; '2028: LKSE'; '2314: FKWD'; '3274: GKVE'; '3352: LKVD'; '3987: AKSE'; '4197: PKSD';	13
		lcl|NC_045512.2_prot_YP_009724390.1_3 [gene=S] [locus_tag=GU280_gp02] [db_xref=GeneID:43740568] [protein=surface glycoprotein] [protein_id=YP_009724390.1] [location=21563..25384] [gbkey=CDS]	'1148: FKEE'; '1204: GKYE'; '1254: CKFD';	3
		lcl|NC_045512.2_prot_YP_009724397.2_11 [gene=N] [locus_tag=GU280_gp10] [db_xref=GeneID:43740575] [protein=nucleocapsid phosphoprotein] [protein_id=YP_009724397.2] [location=28274..29533] [gbkey=CDS]	'60: GKED'; '337: IKLD'; '368: PKKD';	3
[FILV][FILV]xSxS[DE][DE][DE]	0
[FILV]Kx[DE]	4
		lcl|NC_045512.2_prot_YP_009724389.1_1 [gene=orf1ab] [locus_tag=GU280_gp01] [db_xref=GeneID:43740578] [protein=orf1ab polyprotein] [exception=ribosomal slippage] [protein_id=YP_009724389.1] [location=join(266..13468,13468..21555)] [gbkey=CDS]	'1279: LKKD'; '2028: LKSE'; '2314: FKWD'; '3352: LKVD'; '4658: IKWD'; '4663: LKYD'; '5240: VKTD'; '5958: FKTE';	8
		lcl|NC_045512.2_prot_YP_009725295.1_2 [gene=orf1ab] [locus_tag=GU280_gp01] [db_xref=GeneID:43740578] [protein=orf1a polyprotein] [protein_id=YP_009725295.1] [location=266..13483] [gbkey=CDS]	'1279: LKKD'; '2028: LKSE'; '2314: FKWD'; '3352: LKVD';	4
		lcl|NC_045512.2_prot_YP_009724390.1_3 [gene=S] [locus_tag=GU280_gp02] [db_xref=GeneID:43740568] [protein=surface glycoprotein] [protein_id=YP_009724390.1] [location=21563..25384] [gbkey=CDS]	'1148: FKEE';	1
		lcl|NC_045512.2_prot_YP_009724397.2_11 [gene=N] [locus_tag=GU280_gp10] [db_xref=GeneID:43740575] [protein=nucleocapsid phosphoprotein] [protein_id=YP_009724397.2] [location=28274..29533] [gbkey=CDS]	'337: IKLD';	1
[VI]x[VI][VI]	6
		lcl|NC_045512.2_prot_YP_009724389.1_1 [gene=orf1ab] [locus_tag=GU280_gp01] [db_xref=GeneID:43740578] [protein=orf1ab polyprotein] [exception=ribosomal slippage] [protein_id=YP_009724389.1] [location=join(266..13468,13468..21555)] [gbkey=CDS]	'461: INIV'; '473: IAII'; '2227: INII'; '2398: VHVV'; '2538: INVI'; '2751: VNVV'; '2973: VRVV'; '3053: VAIV'; '4623: VPVV'; '4865: VEVV'; '5817: IGVV'; '6089: IKIV'; '6476: VSII'; '6755: VEII';	14
		lcl|NC_045512.2_prot_YP_009725295.1_2 [gene=orf1ab] [locus_tag=GU280_gp01] [db_xref=GeneID:43740578] [protein=orf1a polyprotein] [protein_id=YP_009725295.1] [location=266..13483] [gbkey=CDS]	'461: INIV'; '473: IAII'; '2227: INII'; '2398: VHVV'; '2538: INVI'; '2751: VNVV'; '2973: VRVV'; '3053: VAIV';	8
		lcl|NC_045512.2_prot_YP_009724390.1_3 [gene=S] [locus_tag=GU280_gp02] [db_xref=GeneID:43740568] [protein=surface glycoprotein] [protein_id=YP_009724390.1] [location=21563..25384] [gbkey=CDS]	'595: VSVI'; '1130: IGIV'; '1225: IAIV';	3
		lcl|NC_045512.2_prot_YP_009724391.1_4 [gene=ORF3a] [locus_tag=GU280_gp03] [db_xref=GeneID:43740569] [protein=ORF3a protein] [protein_id=YP_009724391.1] [location=25393..26220] [gbkey=CDS]	'121: VRII';	1
		lcl|NC_045512.2_prot_YP_009724396.1_10 [gene=ORF8] [locus_tag=GU280_gp09] [db_xref=GeneID:43740577] [protein=ORF8 protein] [protein_id=YP_009724396.1] [location=27894..28259] [gbkey=CDS]	'114: VRVV';	1
		lcl|NC_045512.2_prot_YP_009725255.1_12 [gene=ORF10] [locus_tag=GU280_gp11] [db_xref=GeneID:43740576] [protein=ORF10 protein] [protein_id=YP_009725255.1] [location=29558..29674] [gbkey=CDS]	'30: VDVV';	1
GK[DE]x[ST]NPLxxxxLxK	0
RRRRx(5)Rx(4)RK	0
Rx[RK]RGLF	0
RxRRGLF	0
RxxRGLF	0
WxxxWx(9)W	0
KGD	1
		lcl|NC_045512.2_prot_YP_009724389.1_1 [gene=orf1ab] [locus_tag=GU280_gp01] [db_xref=GeneID:43740578] [protein=orf1ab polyprotein] [exception=ribosomal slippage] [protein_id=YP_009724389.1] [location=join(266..13468,13468..21555)] [gbkey=CDS]	'5526: KGD';	1
KGE	2
		lcl|NC_045512.2_prot_YP_009724389.1_1 [gene=orf1ab] [locus_tag=GU280_gp01] [db_xref=GeneID:43740578] [protein=orf1ab polyprotein] [exception=ribosomal slippage] [protein_id=YP_009724389.1] [location=join(266..13468,13468..21555)] [gbkey=CDS]	'1124: KGE';	1
		lcl|NC_045512.2_prot_YP_009725295.1_2 [gene=orf1ab] [locus_tag=GU280_gp01] [db_xref=GeneID:43740578] [protein=orf1a polyprotein] [protein_id=YP_009725295.1] [location=266..13483] [gbkey=CDS]	'1124: KGE';	1
[DE]xxxL[LI]	6
		lcl|NC_045512.2_prot_YP_009724389.1_1 [gene=orf1ab] [locus_tag=GU280_gp01] [db_xref=GeneID:43740578] [protein=orf1ab polyprotein] [exception=ribosomal slippage] [protein_id=YP_009724389.1] [location=join(266..13468,13468..21555)] [gbkey=CDS]	'725: EETGLL'; '1126: EDIQLL'; '3022: DAVNLL'; '4453: EDDNLI'; '4857: DIRQLL';	5
		lcl|NC_045512.2_prot_YP_009725295.1_2 [gene=orf1ab] [locus_tag=GU280_gp01] [db_xref=GeneID:43740578] [protein=orf1a polyprotein] [protein_id=YP_009725295.1] [location=266..13483] [gbkey=CDS]	'725: EETGLL'; '1126: EDIQLL'; '3022: DAVNLL';	3
		lcl|NC_045512.2_prot_YP_009724390.1_3 [gene=S] [locus_tag=GU280_gp02] [db_xref=GeneID:43740568] [protein=surface glycoprotein] [protein_id=YP_009724390.1] [location=21563..25384] [gbkey=CDS]	'748: ECSNLL'; '918: ENQKLI';	2
		lcl|NC_045512.2_prot_YP_009724392.1_5 [gene=E] [locus_tag=GU280_gp04] [db_xref=GeneID:43740570] [protein=envelope protein] [protein_id=YP_009724392.1] [location=26245..26472] [gbkey=CDS]	'8: ETGTLI';	1
		lcl|NC_045512.2_prot_YP_009724393.1_6 [gene=M] [locus_tag=GU280_gp05] [db_xref=GeneID:43740571] [protein=membrane glycoprotein] [protein_id=YP_009724393.1] [location=26523..27191] [gbkey=CDS]	'12: ELKKLL'; '115: ETNILL'; '215: DNIALL';	3
		lcl|NC_045512.2_prot_YP_009724397.2_11 [gene=N] [locus_tag=GU280_gp10] [db_xref=GeneID:43740575] [protein=nucleocapsid phosphoprotein] [protein_id=YP_009724397.2] [location=28274..29533] [gbkey=CDS]	'348: DQVILL';	1
[AG]xxxxGK[ST]	1
		lcl|NC_045512.2_prot_YP_009724389.1_1 [gene=orf1ab] [locus_tag=GU280_gp01] [db_xref=GeneID:43740578] [protein=orf1ab polyprotein] [exception=ribosomal slippage] [protein_id=YP_009724389.1] [location=join(266..13468,13468..21555)] [gbkey=CDS]	'5606: GPPGTGKS';	1
!!!!DxDxR	0
[FILV][FILV][FILV][FILV]DxDxR	0
!!!!D	7
		lcl|NC_045512.2_prot_YP_009724389.1_1 [gene=orf1ab] [locus_tag=GU280_gp01] [db_xref=GeneID:43740578] [protein=orf1ab polyprotein] [exception=ribosomal slippage] [protein_id=YP_009724389.1] [location=join(266..13468,13468..21555)] [gbkey=CDS]	'190: FCGPD'; '687: ALCAD'; '873: CVVAD'; '892: PLGID'; '905: YYLFD'; '924: FYPPD'; '1153: IFGAD'; '1175: LAVFD'; '1254: LLYID'; '1285: YIVGD'; '1845: LYCID'; '1967: VVAID'; '2097: AAYVD'; '2540: VIVFD'; '2569: ILLLD'; '2689: GACID'; '2931: PYCYD'; '2954: YVLMD'; '3018: FCGVD'; '3038: IGALD'; '3292: GLWLD'; '3446: GPFVD'; '3522: IAVLD'; '3808: LGVYD'; '4072: VVIPD'; '4271: AFAVD'; '4623: VPVVD'; …	46
		lcl|NC_045512.2_prot_YP_009725295.1_2 [gene=orf1ab] [locus_tag=GU280_gp01] [db_xref=GeneID:43740578] [protein=orf1a polyprotein] [protein_id=YP_009725295.1] [location=266..13483] [gbkey=CDS]	'190: FCGPD'; '687: ALCAD'; '873: CVVAD'; '892: PLGID'; '905: YYLFD'; '924: FYPPD'; '1153: IFGAD'; '1175: LAVFD'; '1254: LLYID'; '1285: YIVGD'; '1845: LYCID'; '1967: VVAID'; '2097: AAYVD'; '2540: VIVFD'; '2569: ILLLD'; '2689: GACID'; '2931: PYCYD'; '2954: YVLMD'; '3018: FCGVD'; '3038: IGALD'; '3292: GLWLD'; '3446: GPFVD'; '3522: IAVLD'; '3808: LGVYD'; '4072: VVIPD'; '4271: AFAVD';	26
		lcl|NC_045512.2_prot_YP_009724390.1_3 [gene=S] [locus_tag=GU280_gp02] [db_xref=GeneID:43740568] [protein=surface glycoprotein] [protein_id=YP_009724390.1] [location=21563..25384] [gbkey=CDS]	'36: VYYPD'; '174: PFLMD'; '741: YICGD';	3
		lcl|NC_045512.2_prot_YP_009724391.1_4 [gene=ORF3a] [locus_tag=GU280_gp03] [db_xref=GeneID:43740569] [protein=ORF3a protein] [protein_id=YP_009724391.1] [location=25393..26220] [gbkey=CDS]	'138: PLLYD';	1
		lcl|NC_045512.2_prot_YP_009724395.1_8 [gene=ORF7a] [locus_tag=GU280_gp07] [db_xref=GeneID:43740573] [protein=ORF7a protein] [protein_id=YP_009724395.1] [location=27394..27759] [gbkey=CDS]	'65: FACPD';	1
		lcl|NC_045512.2_prot_YP_009724396.1_10 [gene=ORF8] [locus_tag=GU280_gp09] [db_xref=GeneID:43740577] [protein=ORF8 protein] [protein_id=YP_009724396.1] [location=27894..28259] [gbkey=CDS]	'30: PYVVD';	1
		lcl|NC_045512.2_prot_YP_009724397.2_11 [gene=N] [locus_tag=GU280_gp10] [db_xref=GeneID:43740575] [protein=nucleocapsid phosphoprotein] [protein_id=YP_009724397.2] [location=28274..29533] [gbkey=CDS]	'221: LLLLD'; '395: LPAAD';	2
!!!DxxP	2
		lcl|NC_045512.2_prot_YP_009724389.1_1 [gene=orf1ab] [locus_tag=GU280_gp01] [db_xref=GeneID:43740578] [protein=orf1ab polyprotein] [exception=ribosomal slippage] [protein_id=YP_009724389.1] [location=join(266..13468,13468..21555)] [gbkey=CDS]	'191: CGPDGYP'; '4725: IFVDGVP'; '5254: LAIDAYP'; '6246: LLADKFP';	4
		lcl|NC_045512.2_prot_YP_009725295.1_2 [gene=orf1ab] [locus_tag=GU280_gp01] [db_xref=GeneID:43740578] [protein=orf1a polyprotein] [protein_id=YP_009725295.1] [location=266..13483] [gbkey=CDS]	'191: CGPDGYP';	1
[FILV][FILV][FILV][FILV]D	3
		lcl|NC_045512.2_prot_YP_009724389.1_1 [gene=orf1ab] [locus_tag=GU280_gp01] [db_xref=GeneID:43740578] [protein=orf1ab polyprotein] [exception=ribosomal slippage] [protein_id=YP_009724389.1] [location=join(266..13468,13468..21555)] [gbkey=CDS]	'2540: VIVFD'; '2569: ILLLD'; '5694: IVVFD';	3
		lcl|NC_045512.2_prot_YP_009725295.1_2 [gene=orf1ab] [locus_tag=GU280_gp01] [db_xref=GeneID:43740578] [protein=orf1a polyprotein] [protein_id=YP_009725295.1] [location=266..13483] [gbkey=CDS]	'2540: VIVFD'; '2569: ILLLD';	2
		lcl|NC_045512.2_prot_YP_009724397.2_11 [gene=N] [locus_tag=GU280_gp10] [db_xref=GeneID:43740575] [protein=nucleocapsid phosphoprotein] [protein_id=YP_009724397.2] [location=28274..29533] [gbkey=CDS]	'221: LLLLD';	1
[FILV][FILV][FILV]DxxP	1
		lcl|NC_045512.2_prot_YP_009724389.1_1 [gene=orf1ab] [locus_tag=GU280_gp01] [db_xref=GeneID:43740578] [protein=orf1ab polyprotein] [exception=ribosomal slippage] [protein_id=YP_009724389.1] [location=join(266..13468,13468..21555)] [gbkey=CDS]	'4725: IFVDGVP';	1

## Sheet: SARS CoV NS-1
Motif	Number of protein	Name of the proteins	Position: Sequence	Number of instance of the motif
Cx(13,20)Cx(5,6)Cx(9,19)Cx(10,14)Cx(4,14)C	0
KLGxGLxF[DN]	0
KxGGLxF[DN]	0
KRAR	0
KxGFFKR	0
SVSVGMKPSPRP	0
L[FL][VI]F[VIL]LE[LF]LLxF	0
LxCxE	0
!PxV	4
		lcl|AY508724.1_prot_AAR91584.1_1 [protein=nonstructural polyprotein] [exception=ribosomal slippage] [protein_id=AAR91584.1] [location=join(249..13382,13382..21469)] [gbkey=CDS]	'108: VPHV'; '1447: APAV'; '1635: FPQV'; '1762: IPCV'; '2146: MPYV'; '2828: CPVV'; '2862: LPRV'; '3078: LPGV'; '3423: GPFV'; '4199: GPKV'; '4462: CPAV'; '4600: VPIV'; '4696: GPLV'; '4707: VPFV';	14
		lcl|AY508724.1_prot_AAR91585.1_2 [protein=orf1a polyprotein] [protein_id=AAR91585.1] [location=249..13397] [gbkey=CDS]	'108: VPHV'; '1447: APAV'; '1635: FPQV'; '1762: IPCV'; '2146: MPYV'; '2828: CPVV'; '2862: LPRV'; '3078: LPGV'; '3423: GPFV'; '4199: GPKV';	10
		lcl|AY508724.1_prot_AAR91586.1_3 [protein=spike glycoprotein S] [protein_id=AAR91586.1] [location=21476..25243] [gbkey=CDS]	'334: FPSV';	1
		lcl|AY508724.1_prot_AAR91587.1_4 [protein=putative uncharacterized protein 1] [protein_id=AAR91587.1] [location=25252..26076] [gbkey=CDS]	'240: PPNV';	1
[FILV]PxV	3
		lcl|AY508724.1_prot_AAR91584.1_1 [protein=nonstructural polyprotein] [exception=ribosomal slippage] [protein_id=AAR91584.1] [location=join(249..13382,13382..21469)] [gbkey=CDS]	'108: VPHV'; '1635: FPQV'; '1762: IPCV'; '2862: LPRV'; '3078: LPGV'; '4600: VPIV'; '4707: VPFV';	7
		lcl|AY508724.1_prot_AAR91585.1_2 [protein=orf1a polyprotein] [protein_id=AAR91585.1] [location=249..13397] [gbkey=CDS]	'108: VPHV'; '1635: FPQV'; '1762: IPCV'; '2862: LPRV'; '3078: LPGV';	5
		lcl|AY508724.1_prot_AAR91586.1_3 [protein=spike glycoprotein S] [protein_id=AAR91586.1] [location=21476..25243] [gbkey=CDS]	'334: FPSV';	1
DGE	2
		lcl|AY508724.1_prot_AAR91584.1_1 [protein=nonstructural polyprotein] [exception=ribosomal slippage] [protein_id=AAR91584.1] [location=join(249..13382,13382..21469)] [gbkey=CDS]	'1524: DGE';	1
		lcl|AY508724.1_prot_AAR91585.1_2 [protein=orf1a polyprotein] [protein_id=AAR91585.1] [location=249..13397] [gbkey=CDS]	'1524: DGE';	1
DLxxL	3
		lcl|AY508724.1_prot_AAR91584.1_1 [protein=nonstructural polyprotein] [exception=ribosomal slippage] [protein_id=AAR91584.1] [location=join(249..13382,13382..21469)] [gbkey=CDS]	'2294: DLTIL'; '6954: DLYKL';	2
		lcl|AY508724.1_prot_AAR91585.1_2 [protein=orf1a polyprotein] [protein_id=AAR91585.1] [location=249..13397] [gbkey=CDS]	'2294: DLTIL';	1
		lcl|AY508724.1_prot_AAR91586.1_3 [protein=spike glycoprotein S] [protein_id=AAR91586.1] [location=21476..25243] [gbkey=CDS]	'1181: DLQEL';	1
IDA	4
		lcl|AY508724.1_prot_AAR91584.1_1 [protein=nonstructural polyprotein] [exception=ribosomal slippage] [protein_id=AAR91584.1] [location=join(249..13382,13382..21469)] [gbkey=CDS]	'3812: IDA'; '5233: IDA';	2
		lcl|AY508724.1_prot_AAR91585.1_2 [protein=orf1a polyprotein] [protein_id=AAR91585.1] [location=249..13397] [gbkey=CDS]	'3812: IDA';	1
		lcl|AY508724.1_prot_AAR91586.1_3 [protein=spike glycoprotein S] [protein_id=AAR91586.1] [location=21476..25243] [gbkey=CDS]	'428: IDA';	1
		lcl|AY508724.1_prot_AAR91593.1_10 [protein=nucleocapsid protein N] [protein_id=AAR91593.1] [location=28104..29372] [gbkey=CDS]	'358: IDA';	1
LDI	1
		lcl|AY508724.1_prot_AAR91586.1_3 [protein=spike glycoprotein S] [protein_id=AAR91586.1] [location=21476..25243] [gbkey=CDS]	'571: LDI';	1
LDV	4
		lcl|AY508724.1_prot_AAR91584.1_1 [protein=nonstructural polyprotein] [exception=ribosomal slippage] [protein_id=AAR91584.1] [location=join(249..13382,13382..21469)] [gbkey=CDS]	'3018: LDV';	1
		lcl|AY508724.1_prot_AAR91585.1_2 [protein=orf1a polyprotein] [protein_id=AAR91585.1] [location=249..13397] [gbkey=CDS]	'3018: LDV';	1
		lcl|AY508724.1_prot_AAR91586.1_3 [protein=spike glycoprotein S] [protein_id=AAR91586.1] [location=21476..25243] [gbkey=CDS]	'170: LDV';	1
		lcl|AY508724.1_prot_AAR91591.1_8 [protein=putative uncharacterized protein 3] [protein_id=AAR91591.1] [location=27058..27249] [gbkey=CDS]	'29: LDV';	1
RGD	2
		lcl|AY508724.1_prot_AAR91584.1_1 [protein=nonstructural polyprotein] [exception=ribosomal slippage] [protein_id=AAR91584.1] [location=join(249..13382,13382..21469)] [gbkey=CDS]	'1506: RGD';	1
		lcl|AY508724.1_prot_AAR91585.1_2 [protein=orf1a polyprotein] [protein_id=AAR91585.1] [location=249..13397] [gbkey=CDS]	'1506: RGD';	1
RGDLxxL	0
SDI	1
		lcl|AY508724.1_prot_AAR91584.1_1 [protein=nonstructural polyprotein] [exception=ribosomal slippage] [protein_id=AAR91584.1] [location=join(249..13382,13382..21469)] [gbkey=CDS]	'6363: SDI'; '7067: SDI';	2
YGL	0
RxLR	1
		lcl|AY508724.1_prot_AAR91586.1_3 [protein=spike glycoprotein S] [protein_id=AAR91586.1] [location=21476..25243] [gbkey=CDS]	'441: RYLR';	1
[LI]xCx[DE]	2
		lcl|AY508724.1_prot_AAR91584.1_1 [protein=nonstructural polyprotein] [exception=ribosomal slippage] [protein_id=AAR91584.1] [location=join(249..13382,13382..21469)] [gbkey=CDS]	'1018: IKCVD'; '4668: INCLD'; '6760: LWCKD';	3
		lcl|AY508724.1_prot_AAR91585.1_2 [protein=orf1a polyprotein] [protein_id=AAR91585.1] [location=249..13397] [gbkey=CDS]	'1018: IKCVD';	1
Cx(5)Cx(1,)Hx(6)C	3
		lcl|AY508724.1_prot_AAR91584.1_1 [protein=nonstructural polyprotein] [exception=ribosomal slippage] [protein_id=AAR91584.1] [location=join(249..13382,13382..21469)] [gbkey=CDS]	'2216: CLGSLICVTAAFGVLLSNFGAPSYCNGVRELYLNSSNVTTMDFCEGSFPCSICLSGLDSLDSYPALETIQVTISSYKLDLTILGLAAEWVLAYMLFTKFFYLLGLSAIMQVFFGYFASHFISNSWLMWFIISIVQMAPVSAMVRMYIFFASFYYIWKSYVHIMDGCTSSTCMMCYKRNRATRVECTTIVNGMKRSFYVYANGGRGFCKTHNWNCLNCDTFCTGSTFISDEVARDLSLQFKRPINPTDQSSYIVDSVAVKNGALHLYFDKAGQKTYERHPLSHFVNLDNLRANNTKGSLPINVIVFDGKSKCDESASKSASVYYSQLMCQPILLLDQALVSDVGDSTEVSVKMFDAYVDTFSATFSVPMEKLKALVATAHSELAKGVALDGVL…	1
		lcl|AY508724.1_prot_AAR91585.1_2 [protein=orf1a polyprotein] [protein_id=AAR91585.1] [location=249..13397] [gbkey=CDS]	'2216: CLGSLICVTAAFGVLLSNFGAPSYCNGVRELYLNSSNVTTMDFCEGSFPCSICLSGLDSLDSYPALETIQVTISSYKLDLTILGLAAEWVLAYMLFTKFFYLLGLSAIMQVFFGYFASHFISNSWLMWFIISIVQMAPVSAMVRMYIFFASFYYIWKSYVHIMDGCTSSTCMMCYKRNRATRVECTTIVNGMKRSFYVYANGGRGFCKTHNWNCLNCDTFCTGSTFISDEVARDLSLQFKRPINPTDQSSYIVDSVAVKNGALHLYFDKAGQKTYERHPLSHFVNLDNLRANNTKGSLPINVIVFDGKSKCDESASKSASVYYSQLMCQPILLLDQALVSDVGDSTEVSVKMFDAYVDTFSATFSVPMEKLKALVATAHSELAKGVALDGVL…	1
		lcl|AY508724.1_prot_AAR91587.1_4 [protein=putative uncharacterized protein 1] [protein_id=AAR91587.1] [location=25252..26076] [gbkey=CDS]	'121: CRIIMRCWLCWKCKSKNPLLYDANYFVCWHTHNYDYC';	1
!x!xxxx!	11
		lcl|AY508724.1_prot_AAR91584.1_1 [protein=nonstructural polyprotein] [exception=ribosomal slippage] [protein_id=AAR91584.1] [location=join(249..13382,13382..21469)] [gbkey=CDS]	'14: VQLSLPVL'; '28: VRGFGDSV'; '49: GTCGLVEL'; '60: VLPQLEQP'; '69: VFIKRSDA'; '88: LVAEMDGI'; '102: ITLGVLVP'; '115: PIAYRNVL'; '130: GAGGHSYG'; '138: IDLKSYDL'; '166: GSGALREL'; '179: GGAVTRYV'; '190: FCGPDGYP'; '198: LDCIKDFL'; '206: ARAGKSMC'; '266: FKGECPKF'; '274: VFPLNSKV'; '296: FMGRIRSV'; '305: PFASPQEC'; '329: VSWQTCDF'; '337: LKATCEHC'; '351: IEGPTTCG'; '359: YLPTNAVV'; '369: PCPACQDP…	500
		lcl|AY508724.1_prot_AAR91585.1_2 [protein=orf1a polyprotein] [protein_id=AAR91585.1] [location=249..13397] [gbkey=CDS]	'14: VQLSLPVL'; '28: VRGFGDSV'; '49: GTCGLVEL'; '60: VLPQLEQP'; '69: VFIKRSDA'; '88: LVAEMDGI'; '102: ITLGVLVP'; '115: PIAYRNVL'; '130: GAGGHSYG'; '138: IDLKSYDL'; '166: GSGALREL'; '179: GGAVTRYV'; '190: FCGPDGYP'; '198: LDCIKDFL'; '206: ARAGKSMC'; '266: FKGECPKF'; '274: VFPLNSKV'; '296: FMGRIRSV'; '305: PFASPQEC'; '329: VSWQTCDF'; '337: LKATCEHC'; '351: IEGPTTCG'; '359: YLPTNAVV'; '369: PCPACQDP…	307
		lcl|AY508724.1_prot_AAR91586.1_3 [protein=spike glycoprotein S] [protein_id=AAR91586.1] [location=21476..25243] [gbkey=CDS]	'1: MFIFLLFL'; '39: GVYYPDEI'; '52: LYLTQDLF'; '61: PFYSNVTG'; '79: PVIPFKDG'; '100: GWVFGSTM'; '123: VVIRACNF'; '136: PFFAVSKP'; '157: FNCTFEYI'; '170: LDVSEKSG'; '185: FVFKNKDG'; '193: FLYVYKGY'; '203: IDVVRDLP'; '216: LKPIFKLP'; '224: LGINITNF'; '233: AILTAFSP'; '249: AAAYFVGY'; '257: LKPTTFML'; '276: VDCSQNPL'; '286: LKCSVKSF'; '298: GIYQTSNF'; '307: VVPSGDVV'; '317: PNITNLCP'; '338: YAWERKKI…	93
		lcl|AY508724.1_prot_AAR91587.1_4 [protein=putative uncharacterized protein 1] [protein_id=AAR91587.1] [location=25252..26076] [gbkey=CDS]	'1: MDLFMRFF'; '11: GSITAQPV'; '29: VHATATIP'; '37: LQASLPFG'; '45: WLVIGVAF'; '62: IIALNKRW'; '72: ALYKGFQF'; '81: CNLLLLFV'; '94: LLLVAAGM'; '103: AQFLYLYA'; '111: LIYFLQCI'; '121: CRIIMRCW'; '131: WKCKSKNP'; '139: LLYDANYF'; '147: VCWHTHNY'; '156: YCIPYNSV'; '167: IVVTEGDG'; '200: YVVVHGYF'; '212: YQLESTQI'; '230: FFIFNKLV'; '241: PNVQIHTI'; '255: ANPAMDPI';	22
		lcl|AY508724.1_prot_AAR91588.1_5 [protein=putative uncharacterized protein 2] [protein_id=AAR91588.1] [location=25673..26137] [gbkey=CDS]	'1: MMPTTLFA'; '18: YHITVSQI'; '27: LSLLKVTA'; '46: LVVILRIG'; '63: YMAISPKF'; '103: CKYTQSTA'; '122: FMMSRRRL'; '132: CLCKHKKV';	8
		lcl|AY508724.1_prot_AAR91589.1_6 [protein=envelope protein E] [protein_id=AAR91589.1] [location=26101..26331] [gbkey=CDS]	'10: GTLIVNSV'; '18: LLFLAFVV'; '26: FLLVTLAI'; '34: LTALRLCA'; '42: YCCNIVNV'; '52: VKPTVYVY';	6
		lcl|AY508724.1_prot_AAR91590.1_7 [protein=membrane protein M] [protein_id=AAR91590.1] [location=26382..27047] [gbkey=CDS]	'5: GTITVEEL'; '19: WNLVIGFL'; '27: FLAWIMLL'; '44: FLYIIKLV'; '52: FLWLLWPV'; '61: LACFVLAA'; '70: YRINWVTG'; '78: GIAIAMAC'; '87: VGLMWLSY'; '95: FVASFRLF'; '111: FNPETNIL'; '121: VPLRGTIV'; '131: PLMESELV'; '139: IGAVIIRG'; '148: LRMAGHSL'; '156: GRCDIKDL'; '175: LSYYKLGA'; '191: GFAAYNRY'; '203: YKLNTDHA';	19
		lcl|AY508724.1_prot_AAR91591.1_8 [protein=putative uncharacterized protein 3] [protein_id=AAR91591.1] [location=27058..27249] [gbkey=CDS]	'2: FHLVDFQV'; '12: AEILIIIM'; '22: FRIAIWNL';	3
		lcl|AY508724.1_prot_AAR91592.1_9 [protein=putative uncharacterized protein 4] [protein_id=AAR91592.1] [location=27257..27625] [gbkey=CDS]	'3: IILFLTLI'; '24: VRGTTVLL'; '38: GTYEGNSP'; '48: PLADNKFA'; '56: LTCTSTHF'; '68: ADGTRHTY'; '77: LRARSVSP'; '86: LFIRQEEV'; '98: YSPLFLIV'; '106: AALVFLIL';	10
		lcl|AY508724.1_prot_AAR91593.1_10 [protein=nucleocapsid protein N] [protein_id=AAR91593.1] [location=28104..29372] [gbkey=CDS]	'14: PRITFGGP'; '36: ARPKQRRP'; '54: FTALTQHG'; '65: LRFPRGQG'; '73: VPINTNSG'; '95: VRGGDGKM'; '105: LSPRWYFY'; '113: YLGTGPEA'; '123: PYGANKEG'; '131: IVWVATEG'; '169: PKGFYAEG'; '209: ARMASGGG'; '221: ALLLLDRL'; '237: GKGQQQQG'; '269: YNVTQAFG'; '285: GNFGDQDL'; '303: PQIAQFAP'; '314: AFFGMSRI'; '325: VTPSGTWL'; '338: IKLDDKDP'; '351: VILLNKHI'; '391: PTVTLLPA'; '415: ASADSTQA';	23
		lcl|AY508724.1_prot_AAR91594.1_11 [protein=putative uncharacterized protein 5] [protein_id=AAR91594.1] [location=28114..28410] [gbkey=CDS]	'1: MDPNQTNV'; '9: VPPALHLV'; '20: IQLTITRM'; '38: ADPKVYPI'; '55: LSMARRNL'; '67: ARAFQSTP'; '75: IVVQMTKL';	7
!x!xxxx!xx!	11
		lcl|AY508724.1_prot_AAR91584.1_1 [protein=nonstructural polyprotein] [exception=ribosomal slippage] [protein_id=AAR91584.1] [location=join(249..13382,13382..21469)] [gbkey=CDS]	'16: LSLPVLQVRDV'; '28: VRGFGDSVEEA'; '49: GTCGLVELEKG'; '60: VLPQLEQPYVF'; '88: LVAEMDGIQYG'; '102: ITLGVLVPHVG'; '130: GAGGHSYGIDL'; '143: YDLGDELGTDP'; '190: FCGPDGYPLDC'; '266: FKGECPKFVFP'; '296: FMGRIRSVYPF'; '329: VSWQTCDFLKA'; '351: IEGPTTCGYLP'; '366: VKMPCPACQDP'; '405: CFGGCVFAYVG'; '422: YWVPRASADIG'; '467: FHLNEEVAIIL'; '507: GNYKVTKGKPV'; '530: LTPLCGFPSQA'; '542: GVIRSIFARTL'; '560…	294
		lcl|AY508724.1_prot_AAR91585.1_2 [protein=orf1a polyprotein] [protein_id=AAR91585.1] [location=249..13397] [gbkey=CDS]	'16: LSLPVLQVRDV'; '28: VRGFGDSVEEA'; '49: GTCGLVELEKG'; '60: VLPQLEQPYVF'; '88: LVAEMDGIQYG'; '102: ITLGVLVPHVG'; '130: GAGGHSYGIDL'; '143: YDLGDELGTDP'; '190: FCGPDGYPLDC'; '266: FKGECPKFVFP'; '296: FMGRIRSVYPF'; '329: VSWQTCDFLKA'; '351: IEGPTTCGYLP'; '366: VKMPCPACQDP'; '405: CFGGCVFAYVG'; '422: YWVPRASADIG'; '467: FHLNEEVAIIL'; '507: GNYKVTKGKPV'; '530: LTPLCGFPSQA'; '542: GVIRSIFARTL'; '560…	183
		lcl|AY508724.1_prot_AAR91586.1_3 [protein=spike glycoprotein S] [protein_id=AAR91586.1] [location=21476..25243] [gbkey=CDS]	'3: IFLLFLTLTSG'; '52: LYLTQDLFLPF'; '79: PVIPFKDGIYF'; '123: VVIRACNFELC'; '157: FNCTFEYISDA'; '185: FVFKNKDGFLY'; '203: IDVVRDLPSGF'; '216: LKPIFKLPLGI'; '231: FRAILTAFSPA'; '249: AAAYFVGYLKP'; '276: VDCSQNPLAEL'; '288: CSVKSFEIDKG'; '307: VVPSGDVVRFP'; '324: PFGEVFNATKF'; '338: YAWERKKISNC'; '354: VLYNSTFFSTF'; '367: YGVSATKLNDL'; '387: FVVKGDDVRQI'; '398: APGQTGVIADY'; '410: YKLPDDFMGCV'; '43…	56
		lcl|AY508724.1_prot_AAR91587.1_4 [protein=putative uncharacterized protein 1] [protein_id=AAR91587.1] [location=25252..26076] [gbkey=CDS]	'1: MDLFMRFFTLG'; '13: ITAQPVKIDNA'; '29: VHATATIPLQA'; '41: LPFGWLVIGVA'; '52: FLAVFQSATKI'; '69: WQLALYKGFQF'; '81: CNLLLLFVTIY'; '96: LVAAGMEAQFL'; '107: YLYALIYFLQC'; '118: INACRIIMRCW'; '131: WKCKSKNPLLY'; '147: VCWHTHNYDYC'; '200: YVVVHGYFTEV'; '230: FFIFNKLVKDP'; '243: VQIHTIDGSSG';	15
		lcl|AY508724.1_prot_AAR91588.1_5 [protein=putative uncharacterized protein 2] [protein_id=AAR91588.1] [location=25673..26137] [gbkey=CDS]	'7: FAGTHITMTTV'; '20: ITVSQIQLSLL'; '46: LVVILRIGTQV'; '122: FMMSRRRLLAC';	4
		lcl|AY508724.1_prot_AAR91589.1_6 [protein=envelope protein E] [protein_id=AAR91589.1] [location=26101..26331] [gbkey=CDS]	'10: GTLIVNSVLLF'; '21: LAFVVFLLVTL'; '32: AILTALRLCAY'; '44: CNIVNVSLVKP';	4
		lcl|AY508724.1_prot_AAR91590.1_7 [protein=membrane protein M] [protein_id=AAR91590.1] [location=26382..27047] [gbkey=CDS]	'5: GTITVEELKQL'; '19: WNLVIGFLFLA'; '44: FLYIIKLVFLW'; '55: LLWPVTLACFV'; '67: AAVYRINWVTG'; '78: GIAIAMACIVG'; '89: LMWLSYFVASF'; '101: LFARTRSMWSF'; '121: VPLRGTIVTRP'; '141: AVIIRGHLRMA'; '191: GFAAYNRYRIG';	11
		lcl|AY508724.1_prot_AAR91591.1_8 [protein=putative uncharacterized protein 3] [protein_id=AAR91591.1] [location=27058..27249] [gbkey=CDS]	'2: FHLVDFQVTIA'; '15: LIIIMRTFRIA';	2
		lcl|AY508724.1_prot_AAR91592.1_9 [protein=putative uncharacterized protein 4] [protein_id=AAR91592.1] [location=27257..27625] [gbkey=CDS]	'5: LFLTLIVFTSC'; '24: VRGTTVLLKEP'; '38: GTYEGNSPFHP'; '56: LTCTSTHFAFA'; '77: LRARSVSPKLF'; '98: YSPLFLIVAAL';	6
		lcl|AY508724.1_prot_AAR91593.1_10 [protein=nucleocapsid protein N] [protein_id=AAR91593.1] [location=28104..29372] [gbkey=CDS]	'36: ARPKQRRPQGL'; '65: LRFPRGQGVPI'; '95: VRGGDGKMKEL'; '107: PRWYFYYLGTG'; '123: PYGANKEGIVW'; '169: PKGFYAEGSRG'; '209: ARMASGGGETA'; '221: ALLLLDRLNQL'; '237: GKGQQQQGQTV'; '269: YNVTQAFGRRG'; '308: FAPSASAFFGM'; '327: PSGTWLTYHGA'; '351: VILLNKHIDAY'; '391: PTVTLLPAADM';	14
		lcl|AY508724.1_prot_AAR91594.1_11 [protein=putative uncharacterized protein 5] [protein_id=AAR91594.1] [location=28114..28410] [gbkey=CDS]	'1: MDPNQTNVVPP'; '20: IQLTITRMEDA'; '40: PKVYPIILRLG'; '55: LSMARRNLDSL'; '67: ARAFQSTPIVV';	5
!xxxx!xx!	11
		lcl|AY508724.1_prot_AAR91584.1_1 [protein=nonstructural polyprotein] [exception=ribosomal slippage] [protein_id=AAR91584.1] [location=join(249..13382,13382..21469)] [gbkey=CDS]	'18: LPVLQVRDV'; '27: LVRGFGDSV'; '46: LKNGTCGLV'; '56: LEKGVLPQL'; '77: LSTNHGHKV'; '89: VAEMDGIQY'; '101: GITLGVLVP'; '122: LLRKNGNKG'; '132: GGHSYGIDL'; '145: LGDELGTDP'; '161: WNTKHGSGA'; '177: LNGGAVTRY'; '190: FCGPDGYPL'; '200: CIKDFLARA'; '222: IESKRGVYC'; '249: YEHQTPFEI'; '263: FDTFKGECP'; '276: PLNSKVKVI'; '295: GFMGRIRSV'; '304: YPFASPQEC'; '315: MHLSTLMKC'; '326: CDEVSWQTC'; '336: FLK…	490
		lcl|AY508724.1_prot_AAR91585.1_2 [protein=orf1a polyprotein] [protein_id=AAR91585.1] [location=249..13397] [gbkey=CDS]	'18: LPVLQVRDV'; '27: LVRGFGDSV'; '46: LKNGTCGLV'; '56: LEKGVLPQL'; '77: LSTNHGHKV'; '89: VAEMDGIQY'; '101: GITLGVLVP'; '122: LLRKNGNKG'; '132: GGHSYGIDL'; '145: LGDELGTDP'; '161: WNTKHGSGA'; '177: LNGGAVTRY'; '190: FCGPDGYPL'; '200: CIKDFLARA'; '222: IESKRGVYC'; '249: YEHQTPFEI'; '263: FDTFKGECP'; '276: PLNSKVKVI'; '295: GFMGRIRSV'; '304: YPFASPQEC'; '315: MHLSTLMKC'; '326: CDEVSWQTC'; '336: FLK…	299
		lcl|AY508724.1_prot_AAR91586.1_3 [protein=spike glycoprotein S] [protein_id=AAR91586.1] [location=21476..25243] [gbkey=CDS]	'2: FIFLLFLTL'; '22: FDDVQAPNY'; '53: YLTQDLFLP'; '72: INHTFGNPV'; '81: IPFKDGIYF'; '125: IRACNFELC'; '151: MIFDNAFNC'; '177: GNFKHLREF'; '187: FKNKDGFLY'; '197: YKGYQPIDV'; '218: PIFKLPLGI'; '233: AILTAFSPA'; '245: WGTSAAAYF'; '254: VGYLKPTTF'; '270: GTITDAVDC'; '290: VKSFEIDKG'; '300: YQTSNFRVV'; '309: PSGDVVRFP'; '323: CPFGEVFNA'; '340: WERKKISNC'; '356: YNSTFFSTF'; '366: CYGVSATKL'; '379: FSN…	78
		lcl|AY508724.1_prot_AAR91587.1_4 [protein=putative uncharacterized protein 1] [protein_id=AAR91587.1] [location=25252..26076] [gbkey=CDS]	'3: LFMRFFTLG'; '15: AQPVKIDNA'; '31: ATATIPLQA'; '41: LPFGWLVIG'; '51: AFLAVFQSA'; '64: ALNKRWQLA'; '76: GFQFICNLL'; '86: LFVTIYSHL'; '95: LLVAAGMEA'; '105: FLYLYALIY'; '115: LQCINACRI'; '125: MRCWLCWKC'; '138: PLLYDANYF'; '149: WHTHNYDYC'; '167: IVVTEGDGI'; '197: VKDYVVVHG'; '206: YFTEVYYQL'; '225: IENATFFIF'; '240: PPNVQIHTI'; '250: GSSGVANPA';	20
		lcl|AY508724.1_prot_AAR91588.1_5 [protein=putative uncharacterized protein 2] [protein_id=AAR91588.1] [location=25673..26137] [gbkey=CDS]	'1: MMPTTLFAG'; '12: ITMTTVYHI'; '22: VSQIQLSLL'; '48: VILRIGTQV'; '57: LKTMSLYMA'; '79: LLQTLVLKM'; '88: LHSSSLTSL'; '97: LKTHRMCKY'; '111: LQELLIQQW'; '124: MSRRRLLAC';	10
		lcl|AY508724.1_prot_AAR91589.1_6 [protein=envelope protein E] [protein_id=AAR91589.1] [location=26101..26331] [gbkey=CDS]	'5: VSEETGTLI'; '14: VNSVLLFLA'; '23: FVVFLLVTL'; '32: AILTALRLC'; '41: AYCCNIVNV'; '51: LVKPTVYVY';	6
		lcl|AY508724.1_prot_AAR91590.1_7 [protein=membrane protein M] [protein_id=AAR91590.1] [location=26382..27047] [gbkey=CDS]	'7: ITVEELKQL'; '16: LEQWNLVIG'; '25: FLFLAWIML'; '45: LYIIKLVFL'; '54: WLLWPVTLA'; '64: FVLAAVYRI'; '74: WVTGGIAIA'; '83: MACIVGLMW'; '94: YFVASFRLF'; '103: ARTRSMWSF'; '113: PETNILLNV'; '123: LRGTIVTRP'; '132: LMESELVIG'; '143: IIRGHLRMA'; '155: LGRCDIKDL'; '170: ATSRTLSYY'; '186: VGTDSGFAA'; '195: YNRYRIGNY'; '211: GSNDNIALL';	19
		lcl|AY508724.1_prot_AAR91591.1_8 [protein=putative uncharacterized protein 3] [protein_id=AAR91591.1] [location=27058..27249] [gbkey=CDS]	'4: LVDFQVTIA'; '14: ILIIIMRTF'; '24: IAIWNLDVI'; '36: IVRQLFKPL'; '52: LDDEELMEL';	5
		lcl|AY508724.1_prot_AAR91592.1_9 [protein=putative uncharacterized protein 4] [protein_id=AAR91592.1] [location=27257..27625] [gbkey=CDS]	'1: MKIILFLTL'; '10: IVFTSCELY'; '26: GTTVLLKEP'; '40: YEGNSPFHP'; '50: ADNKFALTC'; '79: ARSVSPKLF'; '93: VQQELYSPL'; '102: FLIVAALVF';	8
		lcl|AY508724.1_prot_AAR91593.1_10 [protein=nucleocapsid protein N] [protein_id=AAR91593.1] [location=28104..29372] [gbkey=CDS]	'13: APRITFGGP'; '38: PKQRRPQGL'; '65: LRFPRGQGV'; '80: GPDDQIGYY'; '97: GGDGKMKEL'; '107: PRWYFYYLG'; '117: GPEASLPYG'; '126: ANKEGIVWV'; '135: ATEGALNTP'; '152: PNNNAATVL'; '163: PQGTTLPKG'; '200: PGSSRGNSP'; '211: MASGGGETA'; '220: LALLLLDRL'; '239: GQQQQGQTV'; '271: VTQAFGRRG'; '280: PEQTQGNFG'; '309: APSASAFFG'; '329: GTWLTYHGA'; '353: LLNKHIDAY'; '391: PTVTLLPAA';	21
		lcl|AY508724.1_prot_AAR91594.1_11 [protein=putative uncharacterized protein 5] [protein_id=AAR91594.1] [location=28114..28410] [gbkey=CDS]	'3: PNQTNVVPP'; '22: LTITRMEDA'; '38: ADPKVYPII'; '50: GSQLSLSMA'; '62: LDSLEARAF'; '74: PIVVQMTKL'; '89: PDEFVVVTA';	7
[FILV]x[FILV]xxxx[FILV]	11
		lcl|AY508724.1_prot_AAR91584.1_1 [protein=nonstructural polyprotein] [exception=ribosomal slippage] [protein_id=AAR91584.1] [location=join(249..13382,13382..21469)] [gbkey=CDS]	'14: VQLSLPVL'; '54: VELEKGVL'; '104: LGVLVPHV'; '138: IDLKSYDL'; '281: VKVIQPRV'; '473: VAIILASF'; '578: LRLVDAMV'; '649: LKFLITGV'; '657: FDIVKGQI'; '679: IDVVNKAL'; '693: VTIAGAKL'; '703: LNLGEVFI'; '756: VVLKNGEL'; '783: VCVNGLML'; '824: VTFGEDTV'; '896: IDLDEWSV'; '1016: VAIKCVDI'; '1034: VIVNAANI'; '1075: LTVGGSCL'; '1093: LHVVGPNL'; '1140: LQVCVQTV'; '1153: IAVNDKAL'; '1385: IKIQEGIV'; '15…	108
		lcl|AY508724.1_prot_AAR91585.1_2 [protein=orf1a polyprotein] [protein_id=AAR91585.1] [location=249..13397] [gbkey=CDS]	'14: VQLSLPVL'; '54: VELEKGVL'; '104: LGVLVPHV'; '138: IDLKSYDL'; '281: VKVIQPRV'; '473: VAIILASF'; '578: LRLVDAMV'; '649: LKFLITGV'; '657: FDIVKGQI'; '679: IDVVNKAL'; '693: VTIAGAKL'; '703: LNLGEVFI'; '756: VVLKNGEL'; '783: VCVNGLML'; '824: VTFGEDTV'; '896: IDLDEWSV'; '1016: VAIKCVDI'; '1034: VIVNAANI'; '1075: LTVGGSCL'; '1093: LHVVGPNL'; '1140: LQVCVQTV'; '1153: IAVNDKAL'; '1385: IKIQEGIV'; '15…	68
		lcl|AY508724.1_prot_AAR91586.1_3 [protein=spike glycoprotein S] [protein_id=AAR91586.1] [location=21476..25243] [gbkey=CDS]	'3: IFLLFLTL'; '52: LYLTQDLF'; '123: VVIRACNF'; '224: LGINITNF'; '387: FVVKGDDV'; '496: VVVLSFEL'; '525: VNFNFNGL'; '571: LDISPCSF'; '594: VAVLYQDV'; '734: LLLQYGSF'; '803: LLFNKVTL'; '840: LTVLPPLL'; '891: IGVTQNVL'; '1043: VFLHVTYV'; '1112: IGIINNTV'; '1200: LGFIAGLI';	16
		lcl|AY508724.1_prot_AAR91587.1_4 [protein=putative uncharacterized protein 1] [protein_id=AAR91587.1] [location=25252..26076] [gbkey=CDS]	'41: LPFGWLVI'; '77: FQFICNLL'; '88: VTIYSHLL'; '230: FFIFNKLV';	4
		lcl|AY508724.1_prot_AAR91588.1_5 [protein=putative uncharacterized protein 2] [protein_id=AAR91588.1] [location=25673..26137] [gbkey=CDS]	'20: ITVSQIQL'; '50: LRIGTQVL';	2
		lcl|AY508724.1_prot_AAR91589.1_6 [protein=envelope protein E] [protein_id=AAR91589.1] [location=26101..26331] [gbkey=CDS]	'12: LIVNSVLL'; '21: LAFVVFLL'; '49: VSLVKPTV';	3
		lcl|AY508724.1_prot_AAR91590.1_7 [protein=membrane protein M] [protein_id=AAR91590.1] [location=26382..27047] [gbkey=CDS]	'21: LVIGFLFL'; '45: LYIIKLVF'; '59: VTLACFVL'; '79: IAIAMACI'; '121: VPLRGTIV'; '137: LVIGAVII';	6
		lcl|AY508724.1_prot_AAR91591.1_8 [protein=putative uncharacterized protein 3] [protein_id=AAR91591.1] [location=27058..27249] [gbkey=CDS]	'2: FHLVDFQV'; '15: LIIIMRTF'; '24: IAIWNLDV';	3
		lcl|AY508724.1_prot_AAR91592.1_9 [protein=putative uncharacterized protein 4] [protein_id=AAR91592.1] [location=27257..27625] [gbkey=CDS]	'3: IILFLTLI'; '86: LFIRQEEV'; '101: LFLIVAAL'; '110: FLILCFTI';	4
		lcl|AY508724.1_prot_AAR91593.1_10 [protein=nucleocapsid protein N] [protein_id=AAR91593.1] [location=28104..29372] [gbkey=CDS]	'351: VILLNKHI';	1
		lcl|AY508724.1_prot_AAR91594.1_11 [protein=putative uncharacterized protein 5] [protein_id=AAR91594.1] [location=28114..28410] [gbkey=CDS]	'13: LHLVDPQI'; '75: IVVQMTKL';	2
[FILV]x[FILV]xxxx[FILV]xx[FILV]	9
		lcl|AY508724.1_prot_AAR91584.1_1 [protein=nonstructural polyprotein] [exception=ribosomal slippage] [protein_id=AAR91584.1] [location=join(249..13382,13382..21469)] [gbkey=CDS]	'16: LSLPVLQVRDV'; '54: VELEKGVLPQL'; '649: LKFLITGVFDI'; '693: VTIAGAKLRSL'; '756: VVLKNGELEAL'; '783: VCVNGLMLLEI'; '824: VTFGEDTVWEV'; '896: IDLDEWSVATF'; '2210: LLLLSICLGSL'; '2547: LLLDQALVSDV'; '2579: FSVPMEKLKAL'; '2749: LMLKATLLCVL'; '2859: LHFLPRVFSAV'; '3061: LFLMSFTILCL'; '3113: VPFWITAIYVF'; '3142: VMFNGVTFSTF'; '3168: LKLRSETLLPL'; '3562: LTFLTSLLILV'; '3581: FFVYENAFLPF'; '3728: IMF…	32
		lcl|AY508724.1_prot_AAR91585.1_2 [protein=orf1a polyprotein] [protein_id=AAR91585.1] [location=249..13397] [gbkey=CDS]	'16: LSLPVLQVRDV'; '54: VELEKGVLPQL'; '649: LKFLITGVFDI'; '693: VTIAGAKLRSL'; '756: VVLKNGELEAL'; '783: VCVNGLMLLEI'; '824: VTFGEDTVWEV'; '896: IDLDEWSVATF'; '2210: LLLLSICLGSL'; '2547: LLLDQALVSDV'; '2579: FSVPMEKLKAL'; '2749: LMLKATLLCVL'; '2859: LHFLPRVFSAV'; '3061: LFLMSFTILCL'; '3113: VPFWITAIYVF'; '3142: VMFNGVTFSTF'; '3168: LKLRSETLLPL'; '3562: LTFLTSLLILV'; '3581: FFVYENAFLPF'; '3728: IMF…	22
		lcl|AY508724.1_prot_AAR91586.1_3 [protein=spike glycoprotein S] [protein_id=AAR91586.1] [location=21476..25243] [gbkey=CDS]	'52: LYLTQDLFLPF'; '130: FELCDNPFFAV'; '224: LGINITNFRAI'; '387: FVVKGDDVRQI'; '571: LDISPCSFGGV'; '1200: LGFIAGLIAIV';	6
		lcl|AY508724.1_prot_AAR91587.1_4 [protein=putative uncharacterized protein 1] [protein_id=AAR91587.1] [location=25252..26076] [gbkey=CDS]	'46: LVIGVAFLAVF'; '77: FQFICNLLLLF';	2
		lcl|AY508724.1_prot_AAR91588.1_5 [protein=putative uncharacterized protein 2] [protein_id=AAR91588.1] [location=25673..26137] [gbkey=CDS]	'20: ITVSQIQLSLL';	1
		lcl|AY508724.1_prot_AAR91589.1_6 [protein=envelope protein E] [protein_id=AAR91589.1] [location=26101..26331] [gbkey=CDS]	'17: VLLFLAFVVFL';	1
		lcl|AY508724.1_prot_AAR91590.1_7 [protein=membrane protein M] [protein_id=AAR91590.1] [location=26382..27047] [gbkey=CDS]	'21: LVIGFLFLAWI'; '45: LYIIKLVFLWL'; '59: VTLACFVLAAV'; '79: IAIAMACIVGL';	4
		lcl|AY508724.1_prot_AAR91591.1_8 [protein=putative uncharacterized protein 3] [protein_id=AAR91591.1] [location=27058..27249] [gbkey=CDS]	'7: FQVTIAEILII'; '22: FRIAIWNLDVI';	2
		lcl|AY508724.1_prot_AAR91592.1_9 [protein=putative uncharacterized protein 4] [protein_id=AAR91592.1] [location=27257..27625] [gbkey=CDS]	'101: LFLIVAALVFL';	1
[FILV]xxxx[FILV]xx[FILV]	11
		lcl|AY508724.1_prot_AAR91584.1_1 [protein=nonstructural polyprotein] [exception=ribosomal slippage] [protein_id=AAR91584.1] [location=join(249..13382,13382..21469)] [gbkey=CDS]	'18: LPVLQVRDV'; '56: LEKGVLPQL'; '406: FGGCVFAYV'; '438: ITGDNVETL'; '459: VNINIVGDF'; '494: LDYKSFKTI'; '562: LQRAAVTIL'; '573: ISEQSLRLV'; '616: LLGTTVEKL'; '648: ILKFLITGV'; '695: IAGAKLRSL'; '758: LKNGELEAL'; '783: VCVNGLMLL'; '807: LATNNVFRL'; '826: FGEDTVWEV'; '876: VAEAVVKTL'; '898: LDEWSVATF'; '1016: VAIKCVDIV'; '1088: LAKKCLHVV'; '1132: FGAKPLQSL'; '1164: VVMDYLDNL'; '1224: FLTNKLLLF'; …	102
		lcl|AY508724.1_prot_AAR91585.1_2 [protein=orf1a polyprotein] [protein_id=AAR91585.1] [location=249..13397] [gbkey=CDS]	'18: LPVLQVRDV'; '56: LEKGVLPQL'; '406: FGGCVFAYV'; '438: ITGDNVETL'; '459: VNINIVGDF'; '494: LDYKSFKTI'; '562: LQRAAVTIL'; '573: ISEQSLRLV'; '616: LLGTTVEKL'; '648: ILKFLITGV'; '695: IAGAKLRSL'; '758: LKNGELEAL'; '783: VCVNGLMLL'; '807: LATNNVFRL'; '826: FGEDTVWEV'; '876: VAEAVVKTL'; '898: LDEWSVATF'; '1016: VAIKCVDIV'; '1088: LAKKCLHVV'; '1132: FGAKPLQSL'; '1164: VVMDYLDNL'; '1224: FLTNKLLLF'; …	66
		lcl|AY508724.1_prot_AAR91586.1_3 [protein=spike glycoprotein S] [protein_id=AAR91586.1] [location=21476..25243] [gbkey=CDS]	'2: FIFLLFLTL'; '54: LTQDLFLPF'; '132: LCDNPFFAV'; '226: INITNFRAI'; '308: VPSGDVVRF'; '329: FNATKFPSV'; '369: VSATKLNDL'; '389: VKGDDVRQI'; '443: LRHGKLRPF'; '496: VVVLSFELL'; '573: ISPCSFGGV'; '779: FGGFNFSQI'; '800: IEDLLFNKV'; '832: ICAQKFNGL'; '958: VLNDILSRL'; '978: LITGRLQSL'; '1042: VVFLHVTYV'; '1071: FPREGVFVF'; '1146: VDLGDISGI'; '1198: VWLGFIAGL'; '1207: IAIVMVTIL';	21
		lcl|AY508724.1_prot_AAR91587.1_4 [protein=putative uncharacterized protein 1] [protein_id=AAR91587.1] [location=25252..26076] [gbkey=CDS]	'47: VIGVAFLAV'; '79: FICNLLLLF'; '106: LYLYALIYF'; '202: VVHGYFTEV'; '225: IENATFFIF';	5
		lcl|AY508724.1_prot_AAR91588.1_5 [protein=putative uncharacterized protein 2] [protein_id=AAR91588.1] [location=25673..26137] [gbkey=CDS]	'12: ITMTTVYHI'; '22: VSQIQLSLL'; '80: LQTLVLKML';	3
		lcl|AY508724.1_prot_AAR91589.1_6 [protein=envelope protein E] [protein_id=AAR91589.1] [location=26101..26331] [gbkey=CDS]	'12: LIVNSVLLF'; '21: LAFVVFLLV';	2
		lcl|AY508724.1_prot_AAR91590.1_7 [protein=membrane protein M] [protein_id=AAR91590.1] [location=26382..27047] [gbkey=CDS]	'7: ITVEELKQL'; '23: IGFLFLAWI'; '45: LYIIKLVFL'; '56: LWPVTLACF'; '81: IAMACIVGL'; '155: LGRCDIKDL';	6
		lcl|AY508724.1_prot_AAR91591.1_8 [protein=putative uncharacterized protein 3] [protein_id=AAR91591.1] [location=27058..27249] [gbkey=CDS]	'9: VTIAEILII'; '24: IAIWNLDVI'; '36: IVRQLFKPL'; '52: LDDEELMEL';	4
		lcl|AY508724.1_prot_AAR91592.1_9 [protein=putative uncharacterized protein 4] [protein_id=AAR91592.1] [location=27257..27625] [gbkey=CDS]	'4: ILFLTLIVF'; '97: LYSPLFLIV';	2
		lcl|AY508724.1_prot_AAR91593.1_10 [protein=nucleocapsid protein N] [protein_id=AAR91593.1] [location=28104..29372] [gbkey=CDS]	'220: LALLLLDRL';	1
		lcl|AY508724.1_prot_AAR91594.1_11 [protein=putative uncharacterized protein 5] [protein_id=AAR91594.1] [location=28114..28410] [gbkey=CDS]	'8: VVPPALHLV';	1
W[ST]xCxVTCG	0
L!x![DE]	6
		lcl|AY508724.1_prot_AAR91584.1_1 [protein=nonstructural polyprotein] [exception=ribosomal slippage] [protein_id=AAR91584.1] [location=join(249..13382,13382..21469)] [gbkey=CDS]	'53: LVELE'; '61: LPQLE'; '788: LMLLE'; '1230: LLFAD'; '1355: LAHAE'; '1822: LYRID'; '3785: LGVYD'; '4634: LIKWD'; '4639: LLKYD'; '4649: LCLFD'; '4839: LFVVE'; '4983: LMGWD'; '5198: LPYPD'; '5433: LFAAE'; '6313: LPGCD';	15
		lcl|AY508724.1_prot_AAR91585.1_2 [protein=orf1a polyprotein] [protein_id=AAR91585.1] [location=249..13397] [gbkey=CDS]	'53: LVELE'; '61: LPQLE'; '788: LMLLE'; '1230: LLFAD'; '1355: LAHAE'; '1822: LYRID'; '3785: LGVYD';	7
		lcl|AY508724.1_prot_AAR91586.1_3 [protein=spike glycoprotein S] [protein_id=AAR91586.1] [location=21476..25243] [gbkey=CDS]	'636: LIGAE'; '1185: LGKYE';	2
		lcl|AY508724.1_prot_AAR91590.1_7 [protein=membrane protein M] [protein_id=AAR91590.1] [location=26382..27047] [gbkey=CDS]	'155: LGRCD';	1
		lcl|AY508724.1_prot_AAR91591.1_8 [protein=putative uncharacterized protein 3] [protein_id=AAR91591.1] [location=27058..27249] [gbkey=CDS]	'57: LMELD';	1
		lcl|AY508724.1_prot_AAR91593.1_10 [protein=nucleocapsid protein N] [protein_id=AAR91593.1] [location=28104..29372] [gbkey=CDS]	'222: LLLLD'; '396: LPAAD';	2
L[FILV]x[FILV][DE]	3
		lcl|AY508724.1_prot_AAR91584.1_1 [protein=nonstructural polyprotein] [exception=ribosomal slippage] [protein_id=AAR91584.1] [location=join(249..13382,13382..21469)] [gbkey=CDS]	'53: LVELE'; '4839: LFVVE';	2
		lcl|AY508724.1_prot_AAR91585.1_2 [protein=orf1a polyprotein] [protein_id=AAR91585.1] [location=249..13397] [gbkey=CDS]	'53: LVELE';	1
		lcl|AY508724.1_prot_AAR91593.1_10 [protein=nucleocapsid protein N] [protein_id=AAR91593.1] [location=28104..29372] [gbkey=CDS]	'222: LLLLD';	1
L[LI][DEN][LF][DE]	0
PWxxW	1
		lcl|AY508724.1_prot_AAR91586.1_3 [protein=spike glycoprotein S] [protein_id=AAR91586.1] [location=21476..25243] [gbkey=CDS]	'1195: PWYVW';	1
[GE][KR]Q[GE]RL	0
[RK]RQ[RK]RF	0
[LM]VxSxVxA	0
KKKRGLF	0
[QE][ST]RGLF	0
KSS[RG]LF	0
RSS[RG]LF	0
[KR]xTQT	0
G[IV]QVD	0
DSGxxS	0
[ENT][HNPS][ILV]Y[ADEG]	0
EDLY	0
EHIYD	0
EHLYA	0
ENIYE	0
EPIYA	0
EPIYG	0
EPLYA	0
EPVYA	0
ESIYE	0
NPLYE	0
TPLYA	0
RxLx[EQD]	2
		lcl|AY508724.1_prot_AAR91584.1_1 [protein=nonstructural polyprotein] [exception=ribosomal slippage] [protein_id=AAR91584.1] [location=join(249..13382,13382..21469)] [gbkey=CDS]	'5258: RKLHD'; '5880: RDLYD'; '6627: RDLED'; '6794: RMLLE';	4
		lcl|AY508724.1_prot_AAR91590.1_7 [protein=membrane protein M] [protein_id=AAR91590.1] [location=26382..27047] [gbkey=CDS]	'130: RPLME';	1
N{P}[ST]{P}	9
		lcl|AY508724.1_prot_AAR91584.1_1 [protein=nonstructural polyprotein] [exception=ribosomal slippage] [protein_id=AAR91584.1] [location=join(249..13382,13382..21469)] [gbkey=CDS]	'48: NGTC'; '389: NHSN'; '556: NHSI'; '916: NFSS'; '1628: NHTK'; '1696: NKTV'; '1899: NASF'; '2079: NTSI'; '2249: NSSN'; '2507: NNTK'; '2685: NVSL'; '3303: NHSF'; '3373: NHTI'; '3382: NGSC'; '3720: NYSG'; '4150: NNSK'; '4233: NATE'; '4240: NSTV'; '5016: NLSH'; '5280: NTSR'; '5403: NVTD'; '5558: NISD'; '5650: NSTL'; '5905: NVTG'; '6031: NNTE'; '6130: NHSV'; '6474: NKTT'; '6918: NDSK'; '6973: NASS';	29
		lcl|AY508724.1_prot_AAR91585.1_2 [protein=orf1a polyprotein] [protein_id=AAR91585.1] [location=249..13397] [gbkey=CDS]	'48: NGTC'; '389: NHSN'; '556: NHSI'; '916: NFSS'; '1628: NHTK'; '1696: NKTV'; '1899: NASF'; '2079: NTSI'; '2249: NSSN'; '2507: NNTK'; '2685: NVSL'; '3303: NHSF'; '3373: NHTI'; '3382: NGSC'; '3720: NYSG'; '4150: NNSK'; '4233: NATE'; '4240: NSTV';	18
		lcl|AY508724.1_prot_AAR91586.1_3 [protein=spike glycoprotein S] [protein_id=AAR91586.1] [location=21476..25243] [gbkey=CDS]	'29: NYTQ'; '65: NVTG'; '73: NHTF'; '109: NKSQ'; '118: NNST'; '158: NCTF'; '227: NITN'; '269: NGTI'; '318: NITN'; '330: NATK'; '357: NSTF'; '589: NASS'; '602: NCTD'; '691: NNTI'; '699: NFSI'; '783: NFSQ'; '1056: NFTT'; '1080: NGTS'; '1116: NNTV'; '1140: NHTS'; '1155: NASV'; '1176: NESL';	22
		lcl|AY508724.1_prot_AAR91587.1_4 [protein=putative uncharacterized protein 1] [protein_id=AAR91587.1] [location=25252..26076] [gbkey=CDS]	'227: NATF';	1
		lcl|AY508724.1_prot_AAR91589.1_6 [protein=envelope protein E] [protein_id=AAR91589.1] [location=26101..26331] [gbkey=CDS]	'48: NVSL'; '66: NSSE';	2
		lcl|AY508724.1_prot_AAR91590.1_7 [protein=membrane protein M] [protein_id=AAR91590.1] [location=26382..27047] [gbkey=CDS]	'4: NGTI';	1
		lcl|AY508724.1_prot_AAR91591.1_8 [protein=putative uncharacterized protein 3] [protein_id=AAR91591.1] [location=27058..27249] [gbkey=CDS]	'48: NYSE';	1
		lcl|AY508724.1_prot_AAR91593.1_10 [protein=nucleocapsid protein N] [protein_id=AAR91593.1] [location=28104..29372] [gbkey=CDS]	'48: NNTA'; '270: NVTQ';	2
		lcl|AY508724.1_prot_AAR91594.1_11 [protein=putative uncharacterized protein 5] [protein_id=AAR91594.1] [location=28114..28410] [gbkey=CDS]	'4: NQTN';	1
AxxxAxxxAxxxW	1
		lcl|AY508724.1_prot_AAR91586.1_3 [protein=spike glycoprotein S] [protein_id=AAR91586.1] [location=21476..25243] [gbkey=CDS]	'233: AILTAFSPAQDTW';	1
VxxxIxxLxxxL	1
		lcl|AY508724.1_prot_AAR91594.1_11 [protein=putative uncharacterized protein 5] [protein_id=AAR91594.1] [location=28114..28410] [gbkey=CDS]	'42: VYPIILRLGSQL';	1
+++xx+	1
		lcl|AY508724.1_prot_AAR91588.1_5 [protein=putative uncharacterized protein 2] [protein_id=AAR91588.1] [location=25673..26137] [gbkey=CDS]	'149: RKKQVR';	1
++x+	5
		lcl|AY508724.1_prot_AAR91584.1_1 [protein=nonstructural polyprotein] [exception=ribosomal slippage] [protein_id=AAR91584.1] [location=join(249..13382,13382..21469)] [gbkey=CDS]	'1323: KKCK'; '1380: RKYK'; '1631: KKWK'; '2391: KRNR'; '3128: KHCH'; '3607: KHKH'; '3955: KKLK'; '3998: KRAK'; '5258: RKLH'; '5765: HKEK'; '5983: RHVR'; '6275: HHDK';	12
		lcl|AY508724.1_prot_AAR91585.1_2 [protein=orf1a polyprotein] [protein_id=AAR91585.1] [location=249..13397] [gbkey=CDS]	'1323: KKCK'; '1380: RKYK'; '1631: KKWK'; '2391: KRNR'; '3128: KHCH'; '3607: KHKH'; '3955: KKLK'; '3998: KRAK';	8
		lcl|AY508724.1_prot_AAR91586.1_3 [protein=spike glycoprotein S] [protein_id=AAR91586.1] [location=21476..25243] [gbkey=CDS]	'180: KHLR'; '444: RHGK';	2
		lcl|AY508724.1_prot_AAR91588.1_5 [protein=putative uncharacterized protein 2] [protein_id=AAR91588.1] [location=25673..26137] [gbkey=CDS]	'135: KHKK';	1
		lcl|AY508724.1_prot_AAR91593.1_10 [protein=nucleocapsid protein N] [protein_id=AAR91593.1] [location=28104..29372] [gbkey=CDS]	'93: RRVR'; '257: KKPR'; '370: KKDK';	3
KKTK	0
GPG[RQ]	0
KRIHIGPGRAFYTT	0
[GD]DIWK	0
LxxLL	6
		lcl|AY508724.1_prot_AAR91584.1_1 [protein=nonstructural polyprotein] [exception=ribosomal slippage] [protein_id=AAR91584.1] [location=join(249..13382,13382..21469)] [gbkey=CDS]	'613: LSNLL'; '1123: LAPLL'; '1533: LKSLL'; '3508: LKELL'; '3565: LTSLL'; '3773: LFCLL'; '3892: LSVLL';	7
		lcl|AY508724.1_prot_AAR91585.1_2 [protein=orf1a polyprotein] [protein_id=AAR91585.1] [location=249..13397] [gbkey=CDS]	'613: LSNLL'; '1123: LAPLL'; '1533: LKSLL'; '3508: LKELL'; '3565: LTSLL'; '3773: LFCLL'; '3892: LSVLL';	7
		lcl|AY508724.1_prot_AAR91586.1_3 [protein=spike glycoprotein S] [protein_id=AAR91586.1] [location=21476..25243] [gbkey=CDS]	'843: LPPLL';	1
		lcl|AY508724.1_prot_AAR91588.1_5 [protein=putative uncharacterized protein 2] [protein_id=AAR91588.1] [location=25673..26137] [gbkey=CDS]	'76: LHKLL'; '93: LTSLL'; '111: LQELL';	3
		lcl|AY508724.1_prot_AAR91590.1_7 [protein=membrane protein M] [protein_id=AAR91590.1] [location=26382..27047] [gbkey=CDS]	'12: LKQLL';	1
		lcl|AY508724.1_prot_AAR91593.1_10 [protein=nucleocapsid protein N] [protein_id=AAR91593.1] [location=28104..29372] [gbkey=CDS]	'220: LALLL';	1
Cx(2)Cx(6)Wx(3)Dx(5)Hx(6)C	0
xYxDx	3
		lcl|AY508724.1_prot_AAR91584.1_1 [protein=nonstructural polyprotein] [exception=ribosomal slippage] [protein_id=AAR91584.1] [location=join(249..13382,13382..21469)] [gbkey=CDS]	'184: RYVDN'; '1167: DYLDN'; '1239: LYHDS'; '1486: SYRDW'; '1574: TYLDG'; '2480: LYFDK'; '2570: AYVDT'; '2881: EYSDF'; '3293: NYEDL'; '3677: VYDDA'; '4256: AYKDY'; '4657: KYWDQ'; '4847: KYFDC'; '4883: LYYDS'; '4889: SYEDQ'; '4974: VYSDV'; '5199: PYPDP'; '5245: EYADV'; '5505: DYGDA'; '6025: GYVDT'; '6348: YYSDS'; '6395: QYLDA'; '6665: VYGDF';	23
		lcl|AY508724.1_prot_AAR91585.1_2 [protein=orf1a polyprotein] [protein_id=AAR91585.1] [location=249..13397] [gbkey=CDS]	'184: RYVDN'; '1167: DYLDN'; '1239: LYHDS'; '1486: SYRDW'; '1574: TYLDG'; '2480: LYFDK'; '2570: AYVDT'; '2881: EYSDF'; '3293: NYEDL'; '3677: VYDDA'; '4256: AYKDY';	11
		lcl|AY508724.1_prot_AAR91586.1_3 [protein=spike glycoprotein S] [protein_id=AAR91586.1] [location=21476..25243] [gbkey=CDS]	'41: YYPDE'; '382: VYADS'; '597: LYQDV';	3
PxxP	5
		lcl|AY508724.1_prot_AAR91584.1_1 [protein=nonstructural polyprotein] [exception=ribosomal slippage] [protein_id=AAR91584.1] [location=join(249..13382,13382..21469)] [gbkey=CDS]	'999: PEEP'; '1893: PTQP'; '2457: PINP'; '2844: PGLP'; '3111: PIVP'; '3336: PKTP'; '4197: PKGP'; '5473: PRPP'; '5945: PGIP'; '6862: PWLP';	10
		lcl|AY508724.1_prot_AAR91585.1_2 [protein=orf1a polyprotein] [protein_id=AAR91585.1] [location=249..13397] [gbkey=CDS]	'999: PEEP'; '1893: PTQP'; '2457: PINP'; '2844: PGLP'; '3111: PIVP'; '3336: PKTP'; '4197: PKGP';	7
		lcl|AY508724.1_prot_AAR91586.1_3 [protein=spike glycoprotein S] [protein_id=AAR91586.1] [location=21476..25243] [gbkey=CDS]	'79: PVIP'; '459: PFSP'; '466: PCTP'; '791: PLKP'; '1122: PLQP';	5
		lcl|AY508724.1_prot_AAR91592.1_9 [protein=putative uncharacterized protein 4] [protein_id=AAR91592.1] [location=27257..27625] [gbkey=CDS]	'45: PFHP';	1
		lcl|AY508724.1_prot_AAR91593.1_10 [protein=nucleocapsid protein N] [protein_id=AAR91593.1] [location=28104..29372] [gbkey=CDS]	'366: PTEP';	1
YxYxx!	7
		lcl|AY508724.1_prot_AAR91584.1_1 [protein=nonstructural polyprotein] [exception=ribosomal slippage] [protein_id=AAR91584.1] [location=join(249..13382,13382..21469)] [gbkey=CDS]	'2412: YVYANG'; '3086: YLYLTF'; '3191: YKYFSG'; '3477: YNYEPL'; '4822: YDYYRY'; '5195: YVYLPY'; '5842: YDYVIF'; '6137: YVYNPF';	8
		lcl|AY508724.1_prot_AAR91585.1_2 [protein=orf1a polyprotein] [protein_id=AAR91585.1] [location=249..13397] [gbkey=CDS]	'2412: YVYANG'; '3086: YLYLTF'; '3191: YKYFSG'; '3477: YNYEPL';	4
		lcl|AY508724.1_prot_AAR91586.1_3 [protein=spike glycoprotein S] [protein_id=AAR91586.1] [location=21476..25243] [gbkey=CDS]	'195: YVYKGY'; '408: YNYKLP'; '438: YKYRYL';	3
		lcl|AY508724.1_prot_AAR91587.1_4 [protein=putative uncharacterized protein 1] [protein_id=AAR91587.1] [location=25252..26076] [gbkey=CDS]	'107: YLYALI'; '154: YDYCIP';	2
		lcl|AY508724.1_prot_AAR91589.1_6 [protein=envelope protein E] [protein_id=AAR91589.1] [location=26101..26331] [gbkey=CDS]	'57: YVYSRV';	1
		lcl|AY508724.1_prot_AAR91592.1_9 [protein=putative uncharacterized protein 4] [protein_id=AAR91592.1] [location=27257..27625] [gbkey=CDS]	'18: YHYQEC';	1
		lcl|AY508724.1_prot_AAR91593.1_10 [protein=nucleocapsid protein N] [protein_id=AAR91593.1] [location=28104..29372] [gbkey=CDS]	'110: YFYYLG';	1
YxYxx[FILV]	5
		lcl|AY508724.1_prot_AAR91584.1_1 [protein=nonstructural polyprotein] [exception=ribosomal slippage] [protein_id=AAR91584.1] [location=join(249..13382,13382..21469)] [gbkey=CDS]	'3086: YLYLTF'; '3477: YNYEPL'; '5842: YDYVIF'; '6137: YVYNPF';	4
		lcl|AY508724.1_prot_AAR91585.1_2 [protein=orf1a polyprotein] [protein_id=AAR91585.1] [location=249..13397] [gbkey=CDS]	'3086: YLYLTF'; '3477: YNYEPL';	2
		lcl|AY508724.1_prot_AAR91586.1_3 [protein=spike glycoprotein S] [protein_id=AAR91586.1] [location=21476..25243] [gbkey=CDS]	'438: YKYRYL';	1
		lcl|AY508724.1_prot_AAR91587.1_4 [protein=putative uncharacterized protein 1] [protein_id=AAR91587.1] [location=25252..26076] [gbkey=CDS]	'107: YLYALI';	1
		lcl|AY508724.1_prot_AAR91589.1_6 [protein=envelope protein E] [protein_id=AAR91589.1] [location=26101..26331] [gbkey=CDS]	'57: YVYSRV';	1
NYx[EK]C[LI][KIR][NT]APYID	0
[RKY]xxPxxP	0
PxxPx[KR]	2
		lcl|AY508724.1_prot_AAR91586.1_3 [protein=spike glycoprotein S] [protein_id=AAR91586.1] [location=21476..25243] [gbkey=CDS]	'79: PVIPFK'; '791: PLKPTK';	2
		lcl|AY508724.1_prot_AAR91593.1_10 [protein=nucleocapsid protein N] [protein_id=AAR91593.1] [location=28104..29372] [gbkey=CDS]	'366: PTEPKK';	1
xx[PV]xxP	8
		lcl|AY508724.1_prot_AAR91584.1_1 [protein=nonstructural polyprotein] [exception=ribosomal slippage] [protein_id=AAR91584.1] [location=join(249..13382,13382..21469)] [gbkey=CDS]	'104: LGVLVP'; '281: VKVIQP'; '364: AVVKMP'; '527: RSVLTP'; '777: AIVGTP'; '997: PTPEEP'; '1093: LHVVGP'; '1174: PRVEAP'; '1196: SVVQKP'; '1273: TCVVIP'; '1420: PLVTMP'; '1451: VSVSSP'; '1758: TGVSIP'; '1891: LVPTQP'; '2027: EVVENP'; '2193: NYVKSP'; '2455: KRPINP'; '2842: IVPGLP'; '3109: FSPIVP'; '3274: DTVYCP'; '3334: SNPKTP'; '3628: NMVYMP'; '4047: LMVVVP'; '4195: DTPKGP'; '4325: KYVQIP'; '4533…	36
		lcl|AY508724.1_prot_AAR91585.1_2 [protein=orf1a polyprotein] [protein_id=AAR91585.1] [location=249..13397] [gbkey=CDS]	'104: LGVLVP'; '281: VKVIQP'; '364: AVVKMP'; '527: RSVLTP'; '777: AIVGTP'; '997: PTPEEP'; '1093: LHVVGP'; '1174: PRVEAP'; '1196: SVVQKP'; '1273: TCVVIP'; '1420: PLVTMP'; '1451: VSVSSP'; '1758: TGVSIP'; '1891: LVPTQP'; '2027: EVVENP'; '2193: NYVKSP'; '2455: KRPINP'; '2842: IVPGLP'; '3109: FSPIVP'; '3274: DTVYCP'; '3334: SNPKTP'; '3628: NMVYMP'; '4047: LMVVVP'; '4195: DTPKGP'; '4325: KYVQIP';	25
		lcl|AY508724.1_prot_AAR91586.1_3 [protein=spike glycoprotein S] [protein_id=AAR91586.1] [location=21476..25243] [gbkey=CDS]	'23: DDVQAP'; '38: RGVYYP'; '77: GNPVIP'; '138: FAVSKP'; '312: DVVRFP'; '457: NVPFSP'; '464: GKPCTP'; '508: ATVCGP'; '535: TGVLTP'; '560: DSVRDP'; '581: VSVITP'; '789: PDPLKP'; '840: LTVLPP'; '1117: NTVYDP';	14
		lcl|AY508724.1_prot_AAR91587.1_4 [protein=putative uncharacterized protein 1] [protein_id=AAR91587.1] [location=25252..26076] [gbkey=CDS]	'235: KLVKDP'; '252: SGVANP';	2
		lcl|AY508724.1_prot_AAR91590.1_7 [protein=membrane protein M] [protein_id=AAR91590.1] [location=26382..27047] [gbkey=CDS]	'126: TIVTRP';	1
		lcl|AY508724.1_prot_AAR91592.1_9 [protein=putative uncharacterized protein 4] [protein_id=AAR91592.1] [location=27257..27625] [gbkey=CDS]	'43: NSPFHP';	1
		lcl|AY508724.1_prot_AAR91593.1_10 [protein=nucleocapsid protein N] [protein_id=AAR91593.1] [location=28104..29372] [gbkey=CDS]	'364: FPPTEP';	1
		lcl|AY508724.1_prot_AAR91594.1_11 [protein=putative uncharacterized protein 5] [protein_id=AAR91594.1] [location=28114..28410] [gbkey=CDS]	'6: TNVVPP';	1
[ILV]QxxxRGxxx[RK]	0
Ax(3)IQx(2)FRx(4)KK	0
LRGG	0
Yxx[LI]x(6,8)Yxx[LI]	2
		lcl|AY508724.1_prot_AAR91584.1_1 [protein=nonstructural polyprotein] [exception=ribosomal slippage] [protein_id=AAR91584.1] [location=join(249..13382,13382..21469)] [gbkey=CDS]	'3075: YSFLPGVYSVFYLYL'; '3760: YCFLGYCCCCYFGL';	2
		lcl|AY508724.1_prot_AAR91585.1_2 [protein=orf1a polyprotein] [protein_id=AAR91585.1] [location=249..13397] [gbkey=CDS]	'3075: YSFLPGVYSVFYLYL'; '3760: YCFLGYCCCCYFGL';	2
[SIVL]xYxx[IVL]	6
		lcl|AY508724.1_prot_AAR91584.1_1 [protein=nonstructural polyprotein] [exception=ribosomal slippage] [protein_id=AAR91584.1] [location=join(249..13382,13382..21469)] [gbkey=CDS]	'116: IAYRNV'; '1510: IVYHTL'; '1751: LSYDNL'; '1864: VTYTEI'; '2536: VYYSQL'; '2652: LTYNKV'; '2784: IGYKAI'; '2920: ISYSEL'; '3084: VFYLYL'; '3392: IDYDCV'; '3719: SNYSGV'; '3740: VEYYPL'; '3758: LVYCFL'; '4605: SYYSLL'; '5623: LKYLPI'; '5840: SEYDYV'; '6054: LMYKGL'; '6196: VEYPII'; '6365: IDYVPL'; '6434: VAYNVV'; '6751: IDYAEI';	21
		lcl|AY508724.1_prot_AAR91585.1_2 [protein=orf1a polyprotein] [protein_id=AAR91585.1] [location=249..13397] [gbkey=CDS]	'116: IAYRNV'; '1510: IVYHTL'; '1751: LSYDNL'; '1864: VTYTEI'; '2536: VYYSQL'; '2652: LTYNKV'; '2784: IGYKAI'; '2920: ISYSEL'; '3084: VFYLYL'; '3392: IDYDCV'; '3719: SNYSGV'; '3740: VEYYPL'; '3758: LVYCFL';	13
		lcl|AY508724.1_prot_AAR91586.1_3 [protein=spike glycoprotein S] [protein_id=AAR91586.1] [location=21476..25243] [gbkey=CDS]	'596: VLYQDV';	1
		lcl|AY508724.1_prot_AAR91587.1_4 [protein=putative uncharacterized protein 1] [protein_id=AAR91587.1] [location=25252..26076] [gbkey=CDS]	'158: IPYNSV';	1
		lcl|AY508724.1_prot_AAR91588.1_5 [protein=putative uncharacterized protein 2] [protein_id=AAR91588.1] [location=25673..26137] [gbkey=CDS]	'61: SLYMAI';	1
		lcl|AY508724.1_prot_AAR91590.1_7 [protein=membrane protein M] [protein_id=AAR91590.1] [location=26382..27047] [gbkey=CDS]	'175: LSYYKL';	1
[RK]xxxx!x!	10
		lcl|AY508724.1_prot_AAR91584.1_1 [protein=nonstructural polyprotein] [exception=ribosomal slippage] [protein_id=AAR91584.1] [location=join(249..13382,13382..21469)] [gbkey=CDS]	'11: KTHVQLSL'; '47: KNGTCGLV'; '99: RSGITLGV'; '125: KNGNKGAG'; '175: RELNGGAV'; '261: KKFDTFKG'; '290: KKKTEGFM'; '299: RIRSVYPF'; '402: RTRCFGGC'; '420: RAYWVPRA'; '456: RERVNINI'; '527: RSVLTPLC'; '579: RLVDAMVY'; '623: KLRPIFEW'; '634: KLSAGVEF'; '650: KFLITGVF'; '672: KDCVKCFI'; '701: RSLNLGEV'; '722: RGKEQLQL'; '734: KAPKEVTF'; '794: KDKEQYCA'; '814: RLKGGAPI'; '920: RMYCSFYP'; '1011: KLTD…	172
		lcl|AY508724.1_prot_AAR91585.1_2 [protein=orf1a polyprotein] [protein_id=AAR91585.1] [location=249..13397] [gbkey=CDS]	'11: KTHVQLSL'; '47: KNGTCGLV'; '99: RSGITLGV'; '125: KNGNKGAG'; '175: RELNGGAV'; '261: KKFDTFKG'; '290: KKKTEGFM'; '299: RIRSVYPF'; '402: RTRCFGGC'; '420: RAYWVPRA'; '456: RERVNINI'; '527: RSVLTPLC'; '579: RLVDAMVY'; '623: KLRPIFEW'; '634: KLSAGVEF'; '650: KFLITGVF'; '672: KDCVKCFI'; '701: RSLNLGEV'; '722: RGKEQLQL'; '734: KAPKEVTF'; '794: KDKEQYCA'; '814: RLKGGAPI'; '920: RMYCSFYP'; '1011: KLTD…	94
		lcl|AY508724.1_prot_AAR91586.1_3 [protein=spike glycoprotein S] [protein_id=AAR91586.1] [location=21476..25243] [gbkey=CDS]	'84: KDGIYFAA'; '110: KSQSVIII'; '180: KHLREFVF'; '188: KNKDGFLY'; '198: KGYQPIDV'; '217: KPIFKLPL'; '265: KYDENGTI'; '306: RVVPSGDV'; '333: KFPSVYAW'; '343: KKISNCVA'; '411: KLPDDFMG'; '441: RYLRHGKL'; '453: RDISNVPF'; '465: KPCTPPAL'; '566: KTSEILDI'; '672: KSIVAYTM'; '715: KTSVDCNM'; '747: RALSGIAA'; '758: RNTREVFA'; '777: KYFGGFNF'; '817: KQYGECLG'; '968: KVEAEVQI'; '1010: KMSECVLG'; '1021: R…	28
		lcl|AY508724.1_prot_AAR91587.1_4 [protein=putative uncharacterized protein 1] [protein_id=AAR91587.1] [location=25252..26076] [gbkey=CDS]	'6: RFFTLGSI'; '67: KRWQLALY'; '122: RIIMRCWL'; '134: KSKNPLLY'; '179: KLKEDYQI'; '198: KDYVVVHG'; '238: KDPPNVQI';	7
		lcl|AY508724.1_prot_AAR91588.1_5 [protein=putative uncharacterized protein 2] [protein_id=AAR91588.1] [location=25673..26137] [gbkey=CDS]	'41: KKTTKLVV'; '58: KTMSLYMA'; '69: KFTTSLSL'; '78: KLLQTLVL'; '98: KTHRMCKY'; '126: RRRLLACL';	6
		lcl|AY508724.1_prot_AAR91590.1_7 [protein=membrane protein M] [protein_id=AAR91590.1] [location=26382..27047] [gbkey=CDS]	'41: RNRFLYII'; '49: KLVFLWLL'; '104: RTRSMWSF'; '145: RGHLRMAG'; '173: RTLSYYKL';	5
		lcl|AY508724.1_prot_AAR91591.1_8 [protein=putative uncharacterized protein 3] [protein_id=AAR91591.1] [location=27058..27249] [gbkey=CDS]	'20: RTFRIAIW';	1
		lcl|AY508724.1_prot_AAR91592.1_9 [protein=putative uncharacterized protein 4] [protein_id=AAR91592.1] [location=27257..27625] [gbkey=CDS]	'2: KIILFLTL'; '72: RHTYQLRA';	2
		lcl|AY508724.1_prot_AAR91593.1_10 [protein=nucleocapsid protein N] [protein_id=AAR91593.1] [location=28104..29372] [gbkey=CDS]	'11: RSAPRITF'; '90: RATRRVRG'; '108: RWYFYYLG'; '128: KEGIVWVA'; '204: RGNSPARM'; '320: RIGMEVTP'; '375: KKTDEAQP'; '386: RQKKQPTV';	8
		lcl|AY508724.1_prot_AAR91594.1_11 [protein=putative uncharacterized protein 5] [protein_id=AAR91594.1] [location=28114..28410] [gbkey=CDS]	'48: RLGSQLSL'; '60: RNLDSLEA';	2
[RK]xxxx[FILV]x[FILV]	9
		lcl|AY508724.1_prot_AAR91584.1_1 [protein=nonstructural polyprotein] [exception=ribosomal slippage] [protein_id=AAR91584.1] [location=join(249..13382,13382..21469)] [gbkey=CDS]	'11: KTHVQLSL'; '99: RSGITLGV'; '456: RERVNINI'; '634: KLSAGVEF'; '722: RGKEQLQL'; '734: KAPKEVTF'; '1011: KLTDNVAI'; '1070: KLNGPLTV'; '1135: KPLQSLQV'; '1148: RTQVYIAV'; '1291: RALKKVPV'; '1324: KCKSAFYV'; '1380: RKYKGIKI'; '1446: KAPAVVSV'; '1496: RTELGVEF'; '1532: KLKSLLSL'; '1540: REVKTIKV'; '2085: KKPNELSL'; '2181: KSVAKLCL'; '2199: KFSKLFTI'; '2313: KFFYLLGL'; '2510: KGSLPINV'; '2712: KNNI…	53
		lcl|AY508724.1_prot_AAR91585.1_2 [protein=orf1a polyprotein] [protein_id=AAR91585.1] [location=249..13397] [gbkey=CDS]	'11: KTHVQLSL'; '99: RSGITLGV'; '456: RERVNINI'; '634: KLSAGVEF'; '722: RGKEQLQL'; '734: KAPKEVTF'; '1011: KLTDNVAI'; '1070: KLNGPLTV'; '1135: KPLQSLQV'; '1148: RTQVYIAV'; '1291: RALKKVPV'; '1324: KCKSAFYV'; '1380: RKYKGIKI'; '1446: KAPAVVSV'; '1496: RTELGVEF'; '1532: KLKSLLSL'; '1540: REVKTIKV'; '2085: KKPNELSL'; '2181: KSVAKLCL'; '2199: KFSKLFTI'; '2313: KFFYLLGL'; '2510: KGSLPINV'; '2712: KNNI…	33
		lcl|AY508724.1_prot_AAR91586.1_3 [protein=spike glycoprotein S] [protein_id=AAR91586.1] [location=21476..25243] [gbkey=CDS]	'110: KSQSVIII'; '180: KHLREFVF'; '198: KGYQPIDV'; '217: KPIFKLPL'; '453: RDISNVPF'; '566: KTSEILDI'; '777: KYFGGFNF'; '968: KVEAEVQI'; '1193: KWPWYVWL';	9
		lcl|AY508724.1_prot_AAR91587.1_4 [protein=putative uncharacterized protein 1] [protein_id=AAR91587.1] [location=25252..26076] [gbkey=CDS]	'238: KDPPNVQI';	1
		lcl|AY508724.1_prot_AAR91588.1_5 [protein=putative uncharacterized protein 2] [protein_id=AAR91588.1] [location=25673..26137] [gbkey=CDS]	'41: KKTTKLVV'; '69: KFTTSLSL'; '78: KLLQTLVL';	3
		lcl|AY508724.1_prot_AAR91590.1_7 [protein=membrane protein M] [protein_id=AAR91590.1] [location=26382..27047] [gbkey=CDS]	'43: RFLYIIKL';	1
		lcl|AY508724.1_prot_AAR91592.1_9 [protein=putative uncharacterized protein 4] [protein_id=AAR91592.1] [location=27257..27625] [gbkey=CDS]	'2: KIILFLTL';	1
		lcl|AY508724.1_prot_AAR91593.1_10 [protein=nucleocapsid protein N] [protein_id=AAR91593.1] [location=28104..29372] [gbkey=CDS]	'11: RSAPRITF'; '388: KKQPTVTL';	2
		lcl|AY508724.1_prot_AAR91594.1_11 [protein=putative uncharacterized protein 5] [protein_id=AAR91594.1] [location=28114..28410] [gbkey=CDS]	'48: RLGSQLSL';	1
WxxF	4
		lcl|AY508724.1_prot_AAR91584.1_1 [protein=nonstructural polyprotein] [exception=ribosomal slippage] [protein_id=AAR91584.1] [location=join(249..13382,13382..21469)] [gbkey=CDS]	'3577: WSLF'; '4170: WARF'; '4531: WYDF'; '4585: WYDF'; '5988: WIGF'; '6422: WNTF'; '6965: WTAF';	7
		lcl|AY508724.1_prot_AAR91585.1_2 [protein=orf1a polyprotein] [protein_id=AAR91585.1] [location=249..13397] [gbkey=CDS]	'3577: WSLF'; '4170: WARF';	2
		lcl|AY508724.1_prot_AAR91586.1_3 [protein=spike glycoprotein S] [protein_id=AAR91586.1] [location=21476..25243] [gbkey=CDS]	'1199: WLGF';	1
		lcl|AY508724.1_prot_AAR91588.1_5 [protein=putative uncharacterized protein 2] [protein_id=AAR91588.1] [location=25673..26137] [gbkey=CDS]	'119: WIQF';	1
KRxxPxGPDPxH	0
KDEL	0
Yxx!	11
		lcl|AY508724.1_prot_AAR91584.1_1 [protein=nonstructural polyprotein] [exception=ribosomal slippage] [protein_id=AAR91584.1] [location=join(249..13382,13382..21469)] [gbkey=CDS]	'68: YVFI'; '118: YRNV'; '143: YDLG'; '304: YPFA'; '413: YVGC'; '422: YWVP'; '496: YKSF'; '600: YVTG'; '717: YRQC'; '799: YCAL'; '837: YKNV'; '922: YCSF'; '957: YQGL'; '1009: YLKL'; '1068: YIKL'; '1113: YENF'; '1152: YIAV'; '1161: YEQV'; '1261: YMVG'; '1330: YVLP'; '1382: YKGI'; '1462: YNGY'; '1487: YRDW'; '1512: YHTL'; '1575: YLDG'; '1612: YHTL'; '1623: YMSA'; '1676: YYRA'; '1753: YDNL'; '1808: …	168
		lcl|AY508724.1_prot_AAR91585.1_2 [protein=orf1a polyprotein] [protein_id=AAR91585.1] [location=249..13397] [gbkey=CDS]	'68: YVFI'; '118: YRNV'; '143: YDLG'; '304: YPFA'; '413: YVGC'; '422: YWVP'; '496: YKSF'; '600: YVTG'; '717: YRQC'; '799: YCAL'; '837: YKNV'; '922: YCSF'; '957: YQGL'; '1009: YLKL'; '1068: YIKL'; '1113: YENF'; '1152: YIAV'; '1161: YEQV'; '1261: YMVG'; '1330: YVLP'; '1382: YKGI'; '1462: YNGY'; '1487: YRDW'; '1512: YHTL'; '1575: YLDG'; '1612: YHTL'; '1623: YMSA'; '1676: YYRA'; '1753: YDNL'; '1808: …	97
		lcl|AY508724.1_prot_AAR91586.1_3 [protein=spike glycoprotein S] [protein_id=AAR91586.1] [location=21476..25243] [gbkey=CDS]	'63: YSNV'; '88: YFAA'; '197: YKGY'; '252: YFVG'; '256: YLKP'; '352: YSVL'; '410: YKLP'; '440: YRYL'; '475: YWPL'; '481: YGFY'; '491: YQPY'; '598: YQDV'; '622: YSTG'; '660: YHTV'; '723: YICG'; '738: YGSF'; '771: YKTP'; '778: YFGG'; '819: YGEC'; '855: YTAA'; '1029: YHLM'; '1120: YDPL'; '1188: YEQY'; '1197: YVWL';	24
		lcl|AY508724.1_prot_AAR91587.1_4 [protein=putative uncharacterized protein 1] [protein_id=AAR91587.1] [location=25252..26076] [gbkey=CDS]	'74: YKGF'; '91: YSHL'; '107: YLYA'; '145: YFVC'; '154: YDYC'; '160: YNSV'; '184: YQIG'; '200: YVVV'; '211: YYQL'; '263: YDEP';	10
		lcl|AY508724.1_prot_AAR91588.1_5 [protein=putative uncharacterized protein 2] [protein_id=AAR91588.1] [location=25673..26137] [gbkey=CDS]	'63: YMAI';	1
		lcl|AY508724.1_prot_AAR91589.1_6 [protein=envelope protein E] [protein_id=AAR91589.1] [location=26101..26331] [gbkey=CDS]	'2: YSFV'; '59: YSRV';	2
		lcl|AY508724.1_prot_AAR91590.1_7 [protein=membrane protein M] [protein_id=AAR91590.1] [location=26382..27047] [gbkey=CDS]	'94: YFVA'; '177: YYKL'; '195: YNRY';	3
		lcl|AY508724.1_prot_AAR91591.1_8 [protein=putative uncharacterized protein 3] [protein_id=AAR91591.1] [location=27058..27249] [gbkey=CDS]	'49: YSEL';	1
		lcl|AY508724.1_prot_AAR91592.1_9 [protein=putative uncharacterized protein 4] [protein_id=AAR91592.1] [location=27257..27625] [gbkey=CDS]	'20: YQEC'; '98: YSPL';	2
		lcl|AY508724.1_prot_AAR91593.1_10 [protein=nucleocapsid protein N] [protein_id=AAR91593.1] [location=28104..29372] [gbkey=CDS]	'88: YRRA'; '110: YFYY'; '173: YAEG'; '299: YKHW'; '334: YHGA'; '361: YKTF';	6
		lcl|AY508724.1_prot_AAR91594.1_11 [protein=putative uncharacterized protein 5] [protein_id=AAR91594.1] [location=28114..28410] [gbkey=CDS]	'43: YPII';	1
Yxx[FILV]	11
		lcl|AY508724.1_prot_AAR91584.1_1 [protein=nonstructural polyprotein] [exception=ribosomal slippage] [protein_id=AAR91584.1] [location=join(249..13382,13382..21469)] [gbkey=CDS]	'68: YVFI'; '118: YRNV'; '496: YKSF'; '799: YCAL'; '837: YKNV'; '922: YCSF'; '957: YQGL'; '1009: YLKL'; '1068: YIKL'; '1113: YENF'; '1152: YIAV'; '1161: YEQV'; '1382: YKGI'; '1512: YHTL'; '1612: YHTL'; '1753: YDNL'; '1813: YTHI'; '1866: YTEI'; '2278: YPAL'; '2308: YMLF'; '2361: YIFF'; '2374: YVHI'; '2538: YSQL'; '2654: YNKV'; '2695: YMSL'; '2786: YKAI'; '2882: YSDF'; '2922: YSEL'; '2988: YRAL'; '…	87
		lcl|AY508724.1_prot_AAR91585.1_2 [protein=orf1a polyprotein] [protein_id=AAR91585.1] [location=249..13397] [gbkey=CDS]	'68: YVFI'; '118: YRNV'; '496: YKSF'; '799: YCAL'; '837: YKNV'; '922: YCSF'; '957: YQGL'; '1009: YLKL'; '1068: YIKL'; '1113: YENF'; '1152: YIAV'; '1161: YEQV'; '1382: YKGI'; '1512: YHTL'; '1612: YHTL'; '1753: YDNL'; '1813: YTHI'; '1866: YTEI'; '2278: YPAL'; '2308: YMLF'; '2361: YIFF'; '2374: YVHI'; '2538: YSQL'; '2654: YNKV'; '2695: YMSL'; '2786: YKAI'; '2882: YSDF'; '2922: YSEL'; '2988: YRAL'; '…	51
		lcl|AY508724.1_prot_AAR91586.1_3 [protein=spike glycoprotein S] [protein_id=AAR91586.1] [location=21476..25243] [gbkey=CDS]	'63: YSNV'; '200: YQPI'; '352: YSVL'; '440: YRYL'; '475: YWPL'; '494: YRVV'; '598: YQDV'; '660: YHTV'; '738: YGSF'; '1120: YDPL'; '1197: YVWL';	11
		lcl|AY508724.1_prot_AAR91587.1_4 [protein=putative uncharacterized protein 1] [protein_id=AAR91587.1] [location=25252..26076] [gbkey=CDS]	'74: YKGF'; '91: YSHL'; '109: YALI'; '160: YNSV'; '200: YVVV'; '211: YYQL';	6
		lcl|AY508724.1_prot_AAR91588.1_5 [protein=putative uncharacterized protein 2] [protein_id=AAR91588.1] [location=25673..26137] [gbkey=CDS]	'63: YMAI';	1
		lcl|AY508724.1_prot_AAR91589.1_6 [protein=envelope protein E] [protein_id=AAR91589.1] [location=26101..26331] [gbkey=CDS]	'2: YSFV'; '59: YSRV';	2
		lcl|AY508724.1_prot_AAR91590.1_7 [protein=membrane protein M] [protein_id=AAR91590.1] [location=26382..27047] [gbkey=CDS]	'177: YYKL';	1
		lcl|AY508724.1_prot_AAR91591.1_8 [protein=putative uncharacterized protein 3] [protein_id=AAR91591.1] [location=27058..27249] [gbkey=CDS]	'49: YSEL';	1
		lcl|AY508724.1_prot_AAR91592.1_9 [protein=putative uncharacterized protein 4] [protein_id=AAR91592.1] [location=27257..27625] [gbkey=CDS]	'98: YSPL';	1
		lcl|AY508724.1_prot_AAR91593.1_10 [protein=nucleocapsid protein N] [protein_id=AAR91593.1] [location=28104..29372] [gbkey=CDS]	'361: YKTF';	1
		lcl|AY508724.1_prot_AAR91594.1_11 [protein=putative uncharacterized protein 5] [protein_id=AAR91594.1] [location=28114..28410] [gbkey=CDS]	'43: YPII';	1
[LIVFM]x(2,3)[LIVFM]x[LIVFM]	11
		lcl|AY508724.1_prot_AAR91584.1_1 [protein=nonstructural polyprotein] [exception=ribosomal slippage] [protein_id=AAR91584.1] [location=join(249..13382,13382..21469)] [gbkey=CDS]	'1: MESLVL'; '14: VQLSLPV'; '23: VRDVLV'; '102: ITLGVLV'; '277: LNSKVKV'; '463: IVGDFHL'; '591: LTNSVII'; '635: LSAGVEF'; '648: ILKFLI'; '660: VKGQIQV'; '675: VKCFIDV'; '682: VNKALEM'; '690: IDQVTI'; '700: LRSLNL'; '727: LQLLMPL'; '779: VGTPVCV'; '788: LMLLEI'; '821: IKGVTF'; '840: VRITFEL'; '890: LLTNMGI'; '903: VATFYL'; '1006: FTGYLKL'; '1018: IKCVDI'; '1071: LNGPLTV'; '1137: LQSLQV'; '1147: VR…	203
		lcl|AY508724.1_prot_AAR91585.1_2 [protein=orf1a polyprotein] [protein_id=AAR91585.1] [location=249..13397] [gbkey=CDS]	'1: MESLVL'; '14: VQLSLPV'; '23: VRDVLV'; '102: ITLGVLV'; '277: LNSKVKV'; '463: IVGDFHL'; '591: LTNSVII'; '635: LSAGVEF'; '648: ILKFLI'; '660: VKGQIQV'; '675: VKCFIDV'; '682: VNKALEM'; '690: IDQVTI'; '700: LRSLNL'; '727: LQLLMPL'; '779: VGTPVCV'; '788: LMLLEI'; '821: IKGVTF'; '840: VRITFEL'; '890: LLTNMGI'; '903: VATFYL'; '1006: FTGYLKL'; '1018: IKCVDI'; '1071: LNGPLTV'; '1137: LQSLQV'; '1147: VR…	130
		lcl|AY508724.1_prot_AAR91586.1_3 [protein=spike glycoprotein S] [protein_id=AAR91586.1] [location=21476..25243] [gbkey=CDS]	'1: MFIFLLF'; '54: LTQDLFL'; '83: FKDGIYF'; '164: ISDAFSL'; '182: LREFVF'; '216: LKPIFKL'; '290: VKSFEI'; '374: LNDLCF'; '455: ISNVPF'; '496: VVVLSF'; '578: FGGVSV'; '675: VAYTMSL'; '696: IPTNFSI'; '708: VMPVSM'; '718: VDCNMYI'; '779: FGGFNF'; '799: FIEDLLF'; '837: FNGLTV'; '876: LQIPFAM'; '888: FNGIGV'; '969: VEAEVQI'; '1042: VVFLHV'; '1203: IAGLIAI'; '1210: VMVTILL'; '1246: VLKGVKL';	25
		lcl|AY508724.1_prot_AAR91587.1_4 [protein=putative uncharacterized protein 1] [protein_id=AAR91587.1] [location=25252..26076] [gbkey=CDS]	'1: MDLFMRF'; '37: LQASLPF'; '46: LVIGVAF'; '73: LYKGFQF'; '80: ICNLLLL'; '90: IYSHLLL'; '108: LYALIYF'; '163: VTDTIVV'; '197: VKDYVVV';	9
		lcl|AY508724.1_prot_AAR91588.1_5 [protein=putative uncharacterized protein 2] [protein_id=AAR91588.1] [location=25673..26137] [gbkey=CDS]	'17: VYHITV'; '27: LSLLKV'; '46: LVVILRI'; '56: VLKTMSL'; '70: FTTSLSL'; '79: LLQTLVL'; '111: LQELLI';	7
		lcl|AY508724.1_prot_AAR91589.1_6 [protein=envelope protein E] [protein_id=AAR91589.1] [location=26101..26331] [gbkey=CDS]	'13: IVNSVLL'; '20: FLAFVVF'; '27: LLVTLAI'; '34: LTALRL'; '46: IVNVSL'; '52: VKPTVYV'; '71: VPDLLV';	7
		lcl|AY508724.1_prot_AAR91590.1_7 [protein=membrane protein M] [protein_id=AAR91590.1] [location=26382..27047] [gbkey=CDS]	'21: LVIGFLF'; '28: LAWIMLL'; '44: FLYIIKL'; '55: LLWPVTL'; '75: VTGGIAI'; '83: MACIVGL'; '95: FVASFRL'; '117: ILLNVPL'; '133: MESELVI'; '144: IRGHLRM'; '163: LPKEITV';	11
		lcl|AY508724.1_prot_AAR91591.1_8 [protein=putative uncharacterized protein 3] [protein_id=AAR91591.1] [location=27058..27249] [gbkey=CDS]	'1: MFHLVDF'; '11: IAEILII'; '18: IMRTFRI'; '26: IWNLDV';	4
		lcl|AY508724.1_prot_AAR91592.1_9 [protein=putative uncharacterized protein 4] [protein_id=AAR91592.1] [location=27257..27625] [gbkey=CDS]	'1: MKIILFL'; '82: VSPKLFI'; '97: LYSPLFL'; '104: IVAALVF'; '111: LILCFTI';	5
		lcl|AY508724.1_prot_AAR91593.1_10 [protein=nucleocapsid protein N] [protein_id=AAR91593.1] [location=28104..29372] [gbkey=CDS]	'220: LALLLL'; '318: MSRIGM'; '347: FKDNVIL';	3
		lcl|AY508724.1_prot_AAR91594.1_11 [protein=putative uncharacterized protein 5] [protein_id=AAR91594.1] [location=28114..28410] [gbkey=CDS]	'9: VPPALHL'; '16: VDPQIQL'; '42: VYPIIL'; '49: LGSQLSL'; '88: LPDEFVV';	5
KRx(10,12)K[KR][KR]	0
KRx(10,12)K[KR]X[KR]	0
K[KR]RK	0
KR[KR]R	0
[PR]xxKR{DE}[KR]	0
KRx[WFY]xxAF	0
[RP]xxKR[KR]{DE}	0
LGKR[KR][WFY]	0
KRxR	2
		lcl|AY508724.1_prot_AAR91584.1_1 [protein=nonstructural polyprotein] [exception=ribosomal slippage] [protein_id=AAR91584.1] [location=join(249..13382,13382..21469)] [gbkey=CDS]	'2391: KRNR';	1
		lcl|AY508724.1_prot_AAR91585.1_2 [protein=orf1a polyprotein] [protein_id=AAR91585.1] [location=249..13397] [gbkey=CDS]	'2391: KRNR';	1
RKRP	0
[ST]x[VIL]	11
		lcl|AY508724.1_prot_AAR91584.1_1 [protein=nonstructural polyprotein] [exception=ribosomal slippage] [protein_id=AAR91584.1] [location=join(249..13382,13382..21469)] [gbkey=CDS]	'3: SLV'; '12: THV'; '100: SGI'; '114: TPI'; '279: SKV'; '318: STL'; '391: SNI'; '395: TRL'; '436: TGI'; '501: TIV'; '528: SVL'; '531: TPL'; '568: TIL'; '588: SDL'; '594: SVI'; '614: SNL'; '619: TTV'; '654: TGV'; '740: TFL'; '749: TVL'; '768: TPV'; '781: TPV'; '867: TEV'; '888: SDL'; '989: SEI'; '1080: SCL'; '1149: TQV'; '1196: SVV'; '1217: TTL'; '1253: SFL'; '1273: TCV'; '1320: TAL'; '1409: SII'…	217
		lcl|AY508724.1_prot_AAR91585.1_2 [protein=orf1a polyprotein] [protein_id=AAR91585.1] [location=249..13397] [gbkey=CDS]	'3: SLV'; '12: THV'; '100: SGI'; '114: TPI'; '279: SKV'; '318: STL'; '391: SNI'; '395: TRL'; '436: TGI'; '501: TIV'; '528: SVL'; '531: TPL'; '568: TIL'; '588: SDL'; '594: SVI'; '614: SNL'; '619: TTV'; '654: TGV'; '740: TFL'; '749: TVL'; '768: TPV'; '781: TPV'; '867: TEV'; '888: SDL'; '989: SEI'; '1080: SCL'; '1149: TQV'; '1196: SVV'; '1217: TTL'; '1253: SFL'; '1273: TCV'; '1320: TAL'; '1409: SII'…	149
		lcl|AY508724.1_prot_AAR91586.1_3 [protein=spike glycoprotein S] [protein_id=AAR91586.1] [location=21476..25243] [gbkey=CDS]	'14: SDL'; '64: SNV'; '95: SNV'; '113: SVI'; '121: TNV'; '150: TMI'; '320: TNL'; '353: SVL'; '372: TKL'; '380: SNV'; '386: SFV'; '402: TGV'; '456: SNV'; '487: TGI'; '517: TDL'; '535: TGV'; '568: SEI'; '582: SVI'; '592: SEV'; '604: TDV'; '608: TAI'; '664: SLL'; '673: SIV'; '685: SSI'; '706: TEV'; '716: TSV'; '743: TQL'; '750: SGI'; '785: SQI'; '798: SFI'; '841: TVL'; '914: SQI'; '925: TAL'; '943: …	44
		lcl|AY508724.1_prot_AAR91587.1_4 [protein=putative uncharacterized protein 1] [protein_id=AAR91587.1] [location=25252..26076] [gbkey=CDS]	'27: STV'; '60: TKI'; '92: SHL'; '166: TIV'; '195: SGV'; '208: TEV'; '217: TQI'; '223: TGI'; '252: SGV'; '270: TSV';	10
		lcl|AY508724.1_prot_AAR91588.1_5 [protein=putative uncharacterized protein 2] [protein_id=AAR91588.1] [location=25673..26137] [gbkey=CDS]	'4: TTL'; '10: THI'; '15: TTV'; '23: SQI'; '28: SLL'; '44: TKL'; '54: TQV'; '72: TSL'; '82: TLV'; '91: SSL'; '94: TSL'; '109: TAL'; '141: TNL';	13
		lcl|AY508724.1_prot_AAR91589.1_6 [protein=envelope protein E] [protein_id=AAR91589.1] [location=26101..26331] [gbkey=CDS]	'3: SFV'; '11: TLI'; '16: SVL'; '35: TAL'; '50: SLV'; '60: SRV';	6
		lcl|AY508724.1_prot_AAR91590.1_7 [protein=membrane protein M] [protein_id=AAR91590.1] [location=26382..27047] [gbkey=CDS]	'115: TNI'; '126: TIV'; '135: SEL';	3
		lcl|AY508724.1_prot_AAR91591.1_8 [protein=putative uncharacterized protein 3] [protein_id=AAR91591.1] [location=27058..27249] [gbkey=CDS]	'34: SSI'; '50: SEL';	2
		lcl|AY508724.1_prot_AAR91592.1_9 [protein=putative uncharacterized protein 4] [protein_id=AAR91592.1] [location=27257..27625] [gbkey=CDS]	'8: TLI'; '27: TTV'; '99: SPL';	3
		lcl|AY508724.1_prot_AAR91593.1_10 [protein=nucleocapsid protein N] [protein_id=AAR91593.1] [location=28104..29372] [gbkey=CDS]	'55: TAL'; '158: TVL'; '166: TTL'; '218: TAL'; '233: SKV'; '319: SRI'; '330: TWL'; '394: TLL';	8
		lcl|AY508724.1_prot_AAR91594.1_11 [protein=putative uncharacterized protein 5] [protein_id=AAR91594.1] [location=28114..28410] [gbkey=CDS]	'6: TNV'; '51: SQL'; '73: TPI'; '80: TKL';	4
x(3)!x(3)!x(3)!x(5)	11
		lcl|AY508724.1_prot_AAR91584.1_1 [protein=nonstructural polyprotein] [exception=ribosomal slippage] [protein_id=AAR91584.1] [location=join(249..13382,13382..21469)] [gbkey=CDS]	'16: LSLPVLQVRDVLVRGFG'; '35: VEEALSEAREHLKNGTC'; '53: LVELEKGVLPQLEQPYV'; '79: TNHGHKVVELVAEMDGI'; '98: GRSGITLGVLVPHVGET'; '120: NVLLRKNGNKGAGGHSY'; '142: SYDLGDELGTDPIEDYE'; '166: GSGALRELTRELNGGAV'; '189: NFCGPDGYPLDCIKDFL'; '263: FDTFKGECPKFVFPLNS'; '293: TEGFMGRIRSVYPFASP'; '334: CDFLKATCEHCGTENLV'; '354: PTTCGYLPTNAVVKMPC'; '373: CQDPEIGPEHSVADYHN'; '390: HSNIETRLRKGGRTRCF'; '410: VFAYVGCY…	301
		lcl|AY508724.1_prot_AAR91585.1_2 [protein=orf1a polyprotein] [protein_id=AAR91585.1] [location=249..13397] [gbkey=CDS]	'16: LSLPVLQVRDVLVRGFG'; '35: VEEALSEAREHLKNGTC'; '53: LVELEKGVLPQLEQPYV'; '79: TNHGHKVVELVAEMDGI'; '98: GRSGITLGVLVPHVGET'; '120: NVLLRKNGNKGAGGHSY'; '142: SYDLGDELGTDPIEDYE'; '166: GSGALRELTRELNGGAV'; '189: NFCGPDGYPLDCIKDFL'; '263: FDTFKGECPKFVFPLNS'; '293: TEGFMGRIRSVYPFASP'; '334: CDFLKATCEHCGTENLV'; '354: PTTCGYLPTNAVVKMPC'; '373: CQDPEIGPEHSVADYHN'; '390: HSNIETRLRKGGRTRCF'; '410: VFAYVGCY…	189
		lcl|AY508724.1_prot_AAR91586.1_3 [protein=spike glycoprotein S] [protein_id=AAR91586.1] [location=21476..25243] [gbkey=CDS]	'36: SMRGVYYPDEIFRSDTL'; '55: TQDLFLPFYSNVTGFHT'; '76: FGNPVIPFKDGIYFAAT'; '121: TNVVIRACNFELCDNPF'; '150: TMIFDNAFNCTFEYISD'; '189: NKDGFLYVYKGYQPIDV'; '209: LPSGFNTLKPIFKLPLG'; '230: NFRAILTAFSPAQDTWG'; '248: SAAAYFVGYLKPTTFML'; '275: AVDCSQNPLAELKCSVK'; '302: TSNFRVVPSGDVVRFPN'; '328: VFNATKFPSVYAWERKK'; '345: ISNCVADYSVLYNSTFF'; '371: ATKLNDLCFSNVYADSF'; '397: IAPGQTGVIADYNYKLP'; '427: NIDATS…	52
		lcl|AY508724.1_prot_AAR91587.1_4 [protein=putative uncharacterized protein 1] [protein_id=AAR91587.1] [location=25252..26076] [gbkey=CDS]	'4: FMRFFTLGSITAQPVKI'; '22: NASPASTVHATATIPLQ'; '39: ASLPFGWLVIGVAFLAV'; '62: IIALNKRWQLALYKGFQ'; '80: ICNLLLLFVTIYSHLLL'; '98: AAGMEAQFLYLYALIYF'; '117: CINACRIIMRCWLCWKC'; '136: KNPLLYDANYFVCWHTH'; '156: YCIPYNSVTDTIVVTEG'; '177: TPKLKEDYQIGGYSEDR'; '194: HSGVKDYVVVHGYFTEV'; '221: TDTGIENATFFIFNKLV'; '247: TIDGSSGVANPAMDPIY';	13
		lcl|AY508724.1_prot_AAR91588.1_5 [protein=putative uncharacterized protein 2] [protein_id=AAR91588.1] [location=25673..26137] [gbkey=CDS]	'11: HITMTTVYHITVSQIQL'; '45: KLVVILRIGTQVLKTMS'; '63: YMAISPKFTTSLSLHKL'; '108: STALQELLIQQWIQFMM';	4
		lcl|AY508724.1_prot_AAR91589.1_6 [protein=envelope protein E] [protein_id=AAR91589.1] [location=26101..26331] [gbkey=CDS]	'7: EETGTLIVNSVLLFLAF'; '25: VFLLVTLAILTALRLCA'; '51: LVKPTVYVYSRVKNLNS';	3
		lcl|AY508724.1_prot_AAR91590.1_7 [protein=membrane protein M] [protein_id=AAR91590.1] [location=26382..27047] [gbkey=CDS]	'12: LKQLLEQWNLVIGFLFL'; '41: RNRFLYIIKLVFLWLLW'; '58: PVTLACFVLAAVYRINW'; '75: VTGGIAIAMACIVGLMW'; '92: LSYFVASFRLFARTRSM'; '110: SFNPETNILLNVPLRGT'; '130: RPLMESELVIGAVIIRG'; '149: RMAGHSLGRCDIKDLPK'; '175: LSYYKLGASQRVGTDSG';	9
		lcl|AY508724.1_prot_AAR91591.1_8 [protein=putative uncharacterized protein 3] [protein_id=AAR91591.1] [location=27058..27249] [gbkey=CDS]	'4: LVDFQVTIAEILIIIMR'; '22: FRIAIWNLDVIISSIVR';	2
		lcl|AY508724.1_prot_AAR91592.1_9 [protein=putative uncharacterized protein 4] [protein_id=AAR91592.1] [location=27257..27625] [gbkey=CDS]	'4: ILFLTLIVFTSCELYHY'; '23: CVRGTTVLLKEPCPSGT'; '43: NSPFHPLADNKFALTCT'; '90: QEEVQQELYSPLFLIVA';	4
		lcl|AY508724.1_prot_AAR91593.1_10 [protein=nucleocapsid protein N] [protein_id=AAR91593.1] [location=28104..29372] [gbkey=CDS]	'40: QRRPQGLPNNTASWFTA'; '84: QIGYYRRATRRVRGGDG'; '102: MKELSPRWYFYYLGTGP'; '119: EASLPYGANKEGIVWVA'; '136: TEGALNTPKDHIGTRNP'; '162: LPQGTTLPKGFYAEGSR'; '198: STPGSSRGNSPARMASG'; '217: ETALALLLLDRLNQLES'; '268: QYNVTQAFGRRGPEQTQ'; '285: GNFGDQDLIRQGTDYKH'; '303: PQIAQFAPSASAFFGMS'; '320: RIGMEVTPSGTWLTYHG'; '358: IDAYKTFPPTEPKKDKK'; '388: KKQPTVTLLPAADMDDF';	14
		lcl|AY508724.1_prot_AAR91594.1_11 [protein=putative uncharacterized protein 5] [protein_id=AAR91594.1] [location=28114..28410] [gbkey=CDS]	'5: QTNVVPPALHLVDPQIQ'; '27: MEDAMGQGQNSADPKVY'; '46: ILRLGSQLSLSMARRNL'; '72: STPIVVQMTKLATTEEL';	4
x(3)[FILV]x(3)[FILV]x(3)[FILV]x(5)	11
		lcl|AY508724.1_prot_AAR91584.1_1 [protein=nonstructural polyprotein] [exception=ribosomal slippage] [protein_id=AAR91584.1] [location=join(249..13382,13382..21469)] [gbkey=CDS]	'20: VLQVRDVLVRGFGDSVE'; '53: LVELEKGVLPQLEQPYV'; '179: GGAVTRYVDNNFCGPDG'; '270: CPKFVFPLNSKVKVIQP'; '403: TRCFGGCVFAYVGCYNK'; '443: VETLNEDLLEILSRERV'; '466: DFHLNEEVAIILASFSA'; '541: AGVIRSIFARTLDAANH'; '594: SVIIMAYVTGGLVQQTS'; '624: LRPIFEWIEAKLSAGVE'; '645: AWEILKFLITGVFDIVK'; '668: SDNIKDCVKCFIDVVNK'; '839: NVRITFELDERVDKVLN'; '869: VTEFACVVAEAVVKTLQ'; '1120: DILLAPLLSAGIFGAKP'; '1144: VQT…	89
		lcl|AY508724.1_prot_AAR91585.1_2 [protein=orf1a polyprotein] [protein_id=AAR91585.1] [location=249..13397] [gbkey=CDS]	'20: VLQVRDVLVRGFGDSVE'; '53: LVELEKGVLPQLEQPYV'; '179: GGAVTRYVDNNFCGPDG'; '270: CPKFVFPLNSKVKVIQP'; '403: TRCFGGCVFAYVGCYNK'; '443: VETLNEDLLEILSRERV'; '466: DFHLNEEVAIILASFSA'; '541: AGVIRSIFARTLDAANH'; '594: SVIIMAYVTGGLVQQTS'; '624: LRPIFEWIEAKLSAGVE'; '645: AWEILKFLITGVFDIVK'; '668: SDNIKDCVKCFIDVVNK'; '839: NVRITFELDERVDKVLN'; '869: VTEFACVVAEAVVKTLQ'; '1120: DILLAPLLSAGIFGAKP'; '1144: VQT…	54
		lcl|AY508724.1_prot_AAR91586.1_3 [protein=spike glycoprotein S] [protein_id=AAR91586.1] [location=21476..25243] [gbkey=CDS]	'51: TLYLTQDLFLPFYSNVT'; '69: FHTINHTFGNPVIPFKD'; '150: TMIFDNAFNCTFEYISD'; '202: PIDVVRDLPSGFNTLKP'; '409: NYKLPDDFMGCVLAWNT'; '693: TIAIPTNFSISITTEVM'; '738: YGSFCTQLNRALSGIAA'; '781: GFNFSQILPDPLKPTKR'; '902: QKQIANQFNKAISQIQE'; '941: LNTLVKQLSSNFGAISS'; '972: EVQIDRLITGRLQSLQT'; '1108: CDVVIGIINNTVYDPLQ'; '1127: LDSFKEELDKYFKNHTS'; '1168: LNEVAKNLNESLIDLQE'; '1195: PWYVWLGFIAGLIAIVM';	15
		lcl|AY508724.1_prot_AAR91587.1_4 [protein=putative uncharacterized protein 1] [protein_id=AAR91587.1] [location=25252..26076] [gbkey=CDS]	'45: WLVIGVAFLAVFQSATK'; '76: GFQFICNLLLLFVTIYS';	2
		lcl|AY508724.1_prot_AAR91588.1_5 [protein=putative uncharacterized protein 2] [protein_id=AAR91588.1] [location=25673..26137] [gbkey=CDS]	'45: KLVVILRIGTQVLKTMS'; '63: YMAISPKFTTSLSLHKL';	2
		lcl|AY508724.1_prot_AAR91589.1_6 [protein=envelope protein E] [protein_id=AAR91589.1] [location=26101..26331] [gbkey=CDS]	'10: GTLIVNSVLLFLAFVVF';	1
		lcl|AY508724.1_prot_AAR91590.1_7 [protein=membrane protein M] [protein_id=AAR91590.1] [location=26382..27047] [gbkey=CDS]	'20: NLVIGFLFLAWIMLLQF'; '41: RNRFLYIIKLVFLWLLW'; '58: PVTLACFVLAAVYRINW'; '116: NILLNVPLRGTIVTRPL';	4
		lcl|AY508724.1_prot_AAR91591.1_8 [protein=putative uncharacterized protein 3] [protein_id=AAR91591.1] [location=27058..27249] [gbkey=CDS]	'4: LVDFQVTIAEILIIIMR'; '26: IWNLDVIISSIVRQLFK';	2
		lcl|AY508724.1_prot_AAR91592.1_9 [protein=putative uncharacterized protein 4] [protein_id=AAR91592.1] [location=27257..27625] [gbkey=CDS]	'90: QEEVQQELYSPLFLIVA';	1
		lcl|AY508724.1_prot_AAR91593.1_10 [protein=nucleocapsid protein N] [protein_id=AAR91593.1] [location=28104..29372] [gbkey=CDS]	'217: ETALALLLLDRLNQLES';	1
		lcl|AY508724.1_prot_AAR91594.1_11 [protein=putative uncharacterized protein 5] [protein_id=AAR91594.1] [location=28114..28410] [gbkey=CDS]	'13: LHLVDPQIQLTITRMED'; '42: VYPIILRLGSQLSLSMA';	2
HxCx[ST]WxS	0
[RHK][STALV]x[ST]x[PESRDIFTQ]	8
		lcl|AY508724.1_prot_AAR91584.1_1 [protein=nonstructural polyprotein] [exception=ribosomal slippage] [protein_id=AAR91584.1] [location=join(249..13382,13382..21469)] [gbkey=CDS]	'1735: KTTTLT'; '2951: RVVTTF'; '3169: KLRSET'; '3831: KVATVQ'; '3857: RVESSS'; '4278: HTGTGQ'; '5334: HVISTS'; '6170: HVASCD'; '6371: KSATCI'; '6427: RLQSLE';	10
		lcl|AY508724.1_prot_AAR91585.1_2 [protein=orf1a polyprotein] [protein_id=AAR91585.1] [location=249..13397] [gbkey=CDS]	'1735: KTTTLT'; '2951: RVVTTF'; '3169: KLRSET'; '3831: KVATVQ'; '3857: RVESSS'; '4278: HTGTGQ';	6
		lcl|AY508724.1_prot_AAR91586.1_3 [protein=spike glycoprotein S] [protein_id=AAR91586.1] [location=21476..25243] [gbkey=CDS]	'33: HTSSMR'; '110: KSQSVI'; '747: RALSGI'; '911: KAISQI'; '977: RLITGR'; '1030: HLMSFP';	6
		lcl|AY508724.1_prot_AAR91588.1_5 [protein=putative uncharacterized protein 2] [protein_id=AAR91588.1] [location=25673..26137] [gbkey=CDS]	'89: HSSSLT';	1
		lcl|AY508724.1_prot_AAR91590.1_7 [protein=membrane protein M] [protein_id=AAR91590.1] [location=26382..27047] [gbkey=CDS]	'185: RVGTDS'; '209: HAGSND';	2
		lcl|AY508724.1_prot_AAR91592.1_9 [protein=putative uncharacterized protein 4] [protein_id=AAR91592.1] [location=27257..27625] [gbkey=CDS]	'78: RARSVS';	1
		lcl|AY508724.1_prot_AAR91593.1_10 [protein=nucleocapsid protein N] [protein_id=AAR91593.1] [location=28104..29372] [gbkey=CDS]	'186: RSSSRS'; '263: RTATKQ';	2
		lcl|AY508724.1_prot_AAR91594.1_11 [protein=putative uncharacterized protein 5] [protein_id=AAR91594.1] [location=28114..28410] [gbkey=CDS]	'81: KLATTE';	1
Rx{P}[ST]{P}P	0
Rxx{P}[ST][IVLM]x	3
		lcl|AY508724.1_prot_AAR91584.1_1 [protein=nonstructural polyprotein] [exception=ribosomal slippage] [protein_id=AAR91584.1] [location=join(249..13382,13382..21469)] [gbkey=CDS]	'99: RSGITLG'; '207: RAGKSMC'; '564: RAAVTIL'; '1440: RCMRSLK'; '1540: REVKTIK'; '2166: RIRASLP'; '3371: RPNHTIK'; '3462: RFTTTLN'; '3683: RRVWTLM'; '4550: RVRQSLL'; '5000: RIMASLV'; '5119: RKHFSMM'; '5728: RLMKTIG'; '5896: RNVATLQ'; '5954: RRLISMM'; '6191: RVDWSVE';	16
		lcl|AY508724.1_prot_AAR91585.1_2 [protein=orf1a polyprotein] [protein_id=AAR91585.1] [location=249..13397] [gbkey=CDS]	'99: RSGITLG'; '207: RAGKSMC'; '564: RAAVTIL'; '1440: RCMRSLK'; '1540: REVKTIK'; '2166: RIRASLP'; '3371: RPNHTIK'; '3462: RFTTTLN'; '3683: RRVWTLM';	9
		lcl|AY508724.1_prot_AAR91594.1_11 [protein=putative uncharacterized protein 5] [protein_id=AAR91594.1] [location=28114..28410] [gbkey=CDS]	'60: RNLDSLE';	1
Gx(1,2)GxxG	2
		lcl|AY508724.1_prot_AAR91584.1_1 [protein=nonstructural polyprotein] [exception=ribosomal slippage] [protein_id=AAR91584.1] [location=join(249..13382,13382..21469)] [gbkey=CDS]	'127: GNKGAGG'; '432: GSGHTG'; '1046: GGGVAG'; '1307: GQGCAG'; '3383: GSCGSVG';	5
		lcl|AY508724.1_prot_AAR91585.1_2 [protein=orf1a polyprotein] [protein_id=AAR91585.1] [location=249..13397] [gbkey=CDS]	'127: GNKGAGG'; '432: GSGHTG'; '1046: GGGVAG'; '1307: GQGCAG'; '3383: GSCGSVG';	5
Gxxx[GA]	8
		lcl|AY508724.1_prot_AAR91584.1_1 [protein=nonstructural polyprotein] [exception=ribosomal slippage] [protein_id=AAR91584.1] [location=join(249..13382,13382..21469)] [gbkey=CDS]	'94: GIQYG'; '101: GITLG'; '127: GNKGA'; '133: GHSYG'; '146: GDELG'; '408: GCVFA'; '761: GELEA'; '776: GAIVG'; '823: GVTFG'; '1046: GGGVA'; '1085: GHNLA'; '1130: GIFGA'; '1307: GQGCA'; '1568: GQQFG'; '1942: GDVVA'; '2993: GVFCG'; '3027: GGIIA'; '3251: GKVEG'; '3360: GSPSG'; '3410: GVHAG'; '3419: GKFYG'; '3491: GPLSA'; '4217: GMVLG'; '4280: GTGQA'; '4351: GMWKG'; '4382: GVSAA'; '4855: GCINA'; '504…	41
		lcl|AY508724.1_prot_AAR91585.1_2 [protein=orf1a polyprotein] [protein_id=AAR91585.1] [location=249..13397] [gbkey=CDS]	'94: GIQYG'; '101: GITLG'; '127: GNKGA'; '133: GHSYG'; '146: GDELG'; '408: GCVFA'; '761: GELEA'; '776: GAIVG'; '823: GVTFG'; '1046: GGGVA'; '1085: GHNLA'; '1130: GIFGA'; '1307: GQGCA'; '1568: GQQFG'; '1942: GDVVA'; '2993: GVFCG'; '3027: GGIIA'; '3251: GKVEG'; '3360: GSPSG'; '3410: GVHAG'; '3419: GKFYG'; '3491: GPLSA'; '4217: GMVLG'; '4280: GTGQA'; '4351: GMWKG';	25
		lcl|AY508724.1_prot_AAR91586.1_3 [protein=spike glycoprotein S] [protein_id=AAR91586.1] [location=21476..25243] [gbkey=CDS]	'86: GIYFA'; '100: GWVFG'; '246: GTSAA'; '418: GCVLA'; '634: GCLIG'; '820: GECLG'; '862: GTATA'; '867: GWTFG'; '1149: GDISG'; '1201: GFIAG';	10
		lcl|AY508724.1_prot_AAR91587.1_4 [protein=putative uncharacterized protein 1] [protein_id=AAR91587.1] [location=25252..26076] [gbkey=CDS]	'11: GSITA'; '224: GIENA';	2
		lcl|AY508724.1_prot_AAR91590.1_7 [protein=membrane protein M] [protein_id=AAR91590.1] [location=26382..27047] [gbkey=CDS]	'78: GIAIA'; '152: GHSLG'; '187: GTDSG';	3
		lcl|AY508724.1_prot_AAR91592.1_9 [protein=putative uncharacterized protein 4] [protein_id=AAR91592.1] [location=27257..27625] [gbkey=CDS]	'38: GTYEG';	1
		lcl|AY508724.1_prot_AAR91593.1_10 [protein=nucleocapsid protein N] [protein_id=AAR91593.1] [location=28104..29372] [gbkey=CDS]	'31: GGRNG'; '176: GSRGG'; '201: GSSRG'; '215: GGETA';	4
		lcl|AY508724.1_prot_AAR91594.1_11 [protein=putative uncharacterized protein 5] [protein_id=AAR91594.1] [location=28114..28410] [gbkey=CDS]	'34: GQNSA';	1
GxxxG	6
		lcl|AY508724.1_prot_AAR91584.1_1 [protein=nonstructural polyprotein] [exception=ribosomal slippage] [protein_id=AAR91584.1] [location=join(249..13382,13382..21469)] [gbkey=CDS]	'94: GIQYG'; '101: GITLG'; '133: GHSYG'; '146: GDELG'; '776: GAIVG'; '823: GVTFG'; '1047: GGVAG'; '1568: GQQFG'; '2993: GVFCG'; '3251: GKVEG'; '3360: GSPSG'; '3410: GVHAG'; '3419: GKFYG'; '4217: GMVLG'; '4351: GMWKG'; '5048: GTSSG'; '5388: GQVFG'; '6012: GFSTG'; '6315: GCDGG'; '6442: GHFDG'; '6554: GRVEG'; '6575: GSVKG'; '6672: GQLGG'; '6848: GSDKG';	24
		lcl|AY508724.1_prot_AAR91585.1_2 [protein=orf1a polyprotein] [protein_id=AAR91585.1] [location=249..13397] [gbkey=CDS]	'94: GIQYG'; '101: GITLG'; '133: GHSYG'; '146: GDELG'; '776: GAIVG'; '823: GVTFG'; '1047: GGVAG'; '1568: GQQFG'; '2993: GVFCG'; '3251: GKVEG'; '3360: GSPSG'; '3410: GVHAG'; '3419: GKFYG'; '4217: GMVLG'; '4351: GMWKG';	15
		lcl|AY508724.1_prot_AAR91586.1_3 [protein=spike glycoprotein S] [protein_id=AAR91586.1] [location=21476..25243] [gbkey=CDS]	'100: GWVFG'; '634: GCLIG'; '820: GECLG'; '867: GWTFG'; '1149: GDISG'; '1201: GFIAG';	6
		lcl|AY508724.1_prot_AAR91590.1_7 [protein=membrane protein M] [protein_id=AAR91590.1] [location=26382..27047] [gbkey=CDS]	'152: GHSLG'; '187: GTDSG';	2
		lcl|AY508724.1_prot_AAR91592.1_9 [protein=putative uncharacterized protein 4] [protein_id=AAR91592.1] [location=27257..27625] [gbkey=CDS]	'38: GTYEG';	1
		lcl|AY508724.1_prot_AAR91593.1_10 [protein=nucleocapsid protein N] [protein_id=AAR91593.1] [location=28104..29372] [gbkey=CDS]	'31: GGRNG'; '176: GSRGG'; '201: GSSRG';	3
CxxxC	5
		lcl|AY508724.1_prot_AAR91584.1_1 [protein=nonstructural polyprotein] [exception=ribosomal slippage] [protein_id=AAR91584.1] [location=join(249..13382,13382..21469)] [gbkey=CDS]	'405: CFGGC'; '2432: CDTFC'; '3396: CVSFC'; '4303: CCLYC'; '4675: CILHC'; '5327: CCKCC'; '6375: CITRC';	7
		lcl|AY508724.1_prot_AAR91585.1_2 [protein=orf1a polyprotein] [protein_id=AAR91585.1] [location=249..13397] [gbkey=CDS]	'405: CFGGC'; '2432: CDTFC'; '3396: CVSFC'; '4303: CCLYC';	4
		lcl|AY508724.1_prot_AAR91586.1_3 [protein=spike glycoprotein S] [protein_id=AAR91586.1] [location=21476..25243] [gbkey=CDS]	'1218: CMTSC'; '1232: CGSCC';	2
		lcl|AY508724.1_prot_AAR91587.1_4 [protein=putative uncharacterized protein 1] [protein_id=AAR91587.1] [location=25252..26076] [gbkey=CDS]	'117: CINAC';	1
		lcl|AY508724.1_prot_AAR91589.1_6 [protein=envelope protein E] [protein_id=AAR91589.1] [location=26101..26331] [gbkey=CDS]	'40: CAYCC';	1
CxxC	5
		lcl|AY508724.1_prot_AAR91584.1_1 [protein=nonstructural polyprotein] [exception=ribosomal slippage] [protein_id=AAR91584.1] [location=join(249..13382,13382..21469)] [gbkey=CDS]	'323: CNHC'; '341: CEHC'; '370: CPAC'; '674: CVKC'; '1729: CKHC'; '1986: CLRC'; '2265: CSIC'; '2386: CMMC'; '2429: CLNC'; '2668: CIDC'; '3766: CCCC'; '4304: CLYC'; '4347: CTVC'; '4667: CINC'; '5306: CVLC'; '5317: CGAC'; '5327: CCKC'; '5742: CRRC'; '6109: CCLC';	19
		lcl|AY508724.1_prot_AAR91585.1_2 [protein=orf1a polyprotein] [protein_id=AAR91585.1] [location=249..13397] [gbkey=CDS]	'323: CNHC'; '341: CEHC'; '370: CPAC'; '674: CVKC'; '1729: CKHC'; '1986: CLRC'; '2265: CSIC'; '2386: CMMC'; '2429: CLNC'; '2668: CIDC'; '3766: CCCC'; '4304: CLYC'; '4347: CTVC';	13
		lcl|AY508724.1_prot_AAR91586.1_3 [protein=spike glycoprotein S] [protein_id=AAR91586.1] [location=21476..25243] [gbkey=CDS]	'1222: CCSC'; '1232: CGSC';	2
		lcl|AY508724.1_prot_AAR91587.1_4 [protein=putative uncharacterized protein 1] [protein_id=AAR91587.1] [location=25252..26076] [gbkey=CDS]	'127: CWLC';	1
		lcl|AY508724.1_prot_AAR91589.1_6 [protein=envelope protein E] [protein_id=AAR91589.1] [location=26101..26331] [gbkey=CDS]	'40: CAYC';	1
PPxY	0
HxxxW	2
		lcl|AY508724.1_prot_AAR91584.1_1 [protein=nonstructural polyprotein] [exception=ribosomal slippage] [protein_id=AAR91584.1] [location=join(249..13382,13382..21469)] [gbkey=CDS]	'236: HEIAW'; '1629: HTKKW'; '4982: HLMGW'; '5984: HVRAW'; '6961: HFSWW';	5
		lcl|AY508724.1_prot_AAR91585.1_2 [protein=orf1a polyprotein] [protein_id=AAR91585.1] [location=249..13397] [gbkey=CDS]	'236: HEIAW'; '1629: HTKKW';	2
GKYLQRRLQ	0
P[TS]AP	0
YxxL	7
		lcl|AY508724.1_prot_AAR91584.1_1 [protein=nonstructural polyprotein] [exception=ribosomal slippage] [protein_id=AAR91584.1] [location=join(249..13382,13382..21469)] [gbkey=CDS]	'799: YCAL'; '957: YQGL'; '1009: YLKL'; '1068: YIKL'; '1512: YHTL'; '1612: YHTL'; '1753: YDNL'; '2278: YPAL'; '2538: YSQL'; '2695: YMSL'; '2922: YSEL'; '2988: YRAL'; '3075: YSFL'; '3086: YLYL'; '3167: YLKL'; '3184: YLAL'; '3294: YEDL'; '3479: YEPL'; '3742: YYPL'; '3760: YCFL'; '3770: YFGL'; '3780: YFRL'; '3788: YDYL'; '4183: YTEL'; '4544: YANL'; '4606: YYSL'; '5097: YECL'; '5115: YAYL'; '5195: YV…	39
		lcl|AY508724.1_prot_AAR91585.1_2 [protein=orf1a polyprotein] [protein_id=AAR91585.1] [location=249..13397] [gbkey=CDS]	'799: YCAL'; '957: YQGL'; '1009: YLKL'; '1068: YIKL'; '1512: YHTL'; '1612: YHTL'; '1753: YDNL'; '2278: YPAL'; '2538: YSQL'; '2695: YMSL'; '2922: YSEL'; '2988: YRAL'; '3075: YSFL'; '3086: YLYL'; '3167: YLKL'; '3184: YLAL'; '3294: YEDL'; '3479: YEPL'; '3742: YYPL'; '3760: YCFL'; '3770: YFGL'; '3780: YFRL'; '3788: YDYL'; '4183: YTEL';	24
		lcl|AY508724.1_prot_AAR91586.1_3 [protein=spike glycoprotein S] [protein_id=AAR91586.1] [location=21476..25243] [gbkey=CDS]	'352: YSVL'; '440: YRYL'; '475: YWPL'; '1120: YDPL'; '1197: YVWL';	5
		lcl|AY508724.1_prot_AAR91587.1_4 [protein=putative uncharacterized protein 1] [protein_id=AAR91587.1] [location=25252..26076] [gbkey=CDS]	'91: YSHL'; '211: YYQL';	2
		lcl|AY508724.1_prot_AAR91590.1_7 [protein=membrane protein M] [protein_id=AAR91590.1] [location=26382..27047] [gbkey=CDS]	'177: YYKL';	1
		lcl|AY508724.1_prot_AAR91591.1_8 [protein=putative uncharacterized protein 3] [protein_id=AAR91591.1] [location=27058..27249] [gbkey=CDS]	'49: YSEL';	1
		lcl|AY508724.1_prot_AAR91592.1_9 [protein=putative uncharacterized protein 4] [protein_id=AAR91592.1] [location=27257..27625] [gbkey=CDS]	'98: YSPL';	1
LYPxL	1
		lcl|AY508724.1_prot_AAR91584.1_1 [protein=nonstructural polyprotein] [exception=ribosomal slippage] [protein_id=AAR91584.1] [location=join(249..13382,13382..21469)] [gbkey=CDS]	'5553: LYPTL';	1
RxxK	5
		lcl|AY508724.1_prot_AAR91584.1_1 [protein=nonstructural polyprotein] [exception=ribosomal slippage] [protein_id=AAR91584.1] [location=join(249..13382,13382..21469)] [gbkey=CDS]	'207: RAGK'; '244: RSDK'; '287: RVEK'; '396: RLRK'; '849: RVDK'; '1291: RALK'; '1380: RKYK'; '1443: RSLK'; '1506: RGDK'; '1540: REVK'; '4172: RFPK'; '4487: RLTK'; '4654: RYFK'; '5487: RVTK'; '5728: RLMK'; '6490: RNIK';	16
		lcl|AY508724.1_prot_AAR91585.1_2 [protein=orf1a polyprotein] [protein_id=AAR91585.1] [location=249..13397] [gbkey=CDS]	'207: RAGK'; '244: RSDK'; '287: RVEK'; '396: RLRK'; '849: RVDK'; '1291: RALK'; '1380: RKYK'; '1443: RSLK'; '1506: RGDK'; '1540: REVK'; '4172: RFPK';	11
		lcl|AY508724.1_prot_AAR91586.1_3 [protein=spike glycoprotein S] [protein_id=AAR91586.1] [location=21476..25243] [gbkey=CDS]	'444: RHGK'; '563: RDPK'; '965: RLDK';	3
		lcl|AY508724.1_prot_AAR91588.1_5 [protein=putative uncharacterized protein 2] [protein_id=AAR91588.1] [location=25673..26137] [gbkey=CDS]	'101: RMCK';	1
		lcl|AY508724.1_prot_AAR91593.1_10 [protein=nucleocapsid protein N] [protein_id=AAR91593.1] [location=28104..29372] [gbkey=CDS]	'386: RQKK';	1
LGxGxxIxW	0
PPLP	0
SLxYLA	0
T[QDE]x(5)ADx(2)[IL]	0
VxHxMY	0
Rx[LC]	9
		lcl|AY508724.1_prot_AAR91584.1_1 [protein=nonstructural polyprotein] [exception=ribosomal slippage] [protein_id=AAR91584.1] [location=join(249..13382,13382..21469)] [gbkey=CDS]	'171: REL'; '175: REL'; '550: RTL'; '701: RSL'; '718: RQC'; '1291: RAL'; '1362: RKL'; '1443: RSL'; '1723: RVL'; '1930: REL'; '1988: RCL'; '2244: REL'; '2448: RDL'; '2663: RDL'; '2989: RAL'; '3183: RYL'; '3538: RQC'; '3906: RLC'; '3976: RKL'; '4015: RKL'; '4379: RVC'; '4618: RAL'; '4648: RLC'; '4718: REL'; '4836: RQL'; '5090: RNL'; '5205: RIL'; '5258: RKL'; '5462: REL'; '5710: RTL'; '5743: RRC'; '…	38
		lcl|AY508724.1_prot_AAR91585.1_2 [protein=orf1a polyprotein] [protein_id=AAR91585.1] [location=249..13397] [gbkey=CDS]	'171: REL'; '175: REL'; '550: RTL'; '701: RSL'; '718: RQC'; '1291: RAL'; '1362: RKL'; '1443: RSL'; '1723: RVL'; '1930: REL'; '1988: RCL'; '2244: REL'; '2448: RDL'; '2663: RDL'; '2989: RAL'; '3183: RYL'; '3538: RQC'; '3906: RLC'; '3976: RKL'; '4015: RKL';	20
		lcl|AY508724.1_prot_AAR91586.1_3 [protein=spike glycoprotein S] [protein_id=AAR91586.1] [location=21476..25243] [gbkey=CDS]	'126: RAC'; '207: RDL'; '441: RYL'; '747: RAL'; '829: RDL';	5
		lcl|AY508724.1_prot_AAR91588.1_5 [protein=putative uncharacterized protein 2] [protein_id=AAR91588.1] [location=25673..26137] [gbkey=CDS]	'101: RMC'; '127: RRL';	2
		lcl|AY508724.1_prot_AAR91589.1_6 [protein=envelope protein E] [protein_id=AAR91589.1] [location=26101..26331] [gbkey=CDS]	'38: RLC';	1
		lcl|AY508724.1_prot_AAR91590.1_7 [protein=membrane protein M] [protein_id=AAR91590.1] [location=26382..27047] [gbkey=CDS]	'43: RFL'; '130: RPL'; '173: RTL';	3
		lcl|AY508724.1_prot_AAR91591.1_8 [protein=putative uncharacterized protein 3] [protein_id=AAR91591.1] [location=27058..27249] [gbkey=CDS]	'38: RQL';	1
		lcl|AY508724.1_prot_AAR91593.1_10 [protein=nucleocapsid protein N] [protein_id=AAR91593.1] [location=28104..29372] [gbkey=CDS]	'406: RQL';	1
		lcl|AY508724.1_prot_AAR91594.1_11 [protein=putative uncharacterized protein 5] [protein_id=AAR91594.1] [location=28114..28410] [gbkey=CDS]	'60: RNL';	1
RxL!	6
		lcl|AY508724.1_prot_AAR91584.1_1 [protein=nonstructural polyprotein] [exception=ribosomal slippage] [protein_id=AAR91584.1] [location=join(249..13382,13382..21469)] [gbkey=CDS]	'1362: RKLM'; '1988: RCLW'; '2244: RELY'; '2663: RDLG'; '3183: RYLA'; '4618: RALA'; '4718: RELG'; '4836: RQLL'; '5205: RILG'; '5710: RTLL'; '5880: RDLY'; '5954: RRLI'; '6180: RCLA'; '6794: RMLL';	14
		lcl|AY508724.1_prot_AAR91585.1_2 [protein=orf1a polyprotein] [protein_id=AAR91585.1] [location=249..13397] [gbkey=CDS]	'1362: RKLM'; '1988: RCLW'; '2244: RELY'; '2663: RDLG'; '3183: RYLA';	5
		lcl|AY508724.1_prot_AAR91586.1_3 [protein=spike glycoprotein S] [protein_id=AAR91586.1] [location=21476..25243] [gbkey=CDS]	'207: RDLP'; '829: RDLI';	2
		lcl|AY508724.1_prot_AAR91588.1_5 [protein=putative uncharacterized protein 2] [protein_id=AAR91588.1] [location=25673..26137] [gbkey=CDS]	'127: RRLL';	1
		lcl|AY508724.1_prot_AAR91590.1_7 [protein=membrane protein M] [protein_id=AAR91590.1] [location=26382..27047] [gbkey=CDS]	'43: RFLY'; '130: RPLM';	2
		lcl|AY508724.1_prot_AAR91591.1_8 [protein=putative uncharacterized protein 3] [protein_id=AAR91591.1] [location=27058..27249] [gbkey=CDS]	'38: RQLF';	1
RxL[FILV]	4
		lcl|AY508724.1_prot_AAR91584.1_1 [protein=nonstructural polyprotein] [exception=ribosomal slippage] [protein_id=AAR91584.1] [location=join(249..13382,13382..21469)] [gbkey=CDS]	'4836: RQLL'; '5710: RTLL'; '5954: RRLI'; '6794: RMLL';	4
		lcl|AY508724.1_prot_AAR91586.1_3 [protein=spike glycoprotein S] [protein_id=AAR91586.1] [location=21476..25243] [gbkey=CDS]	'829: RDLI';	1
		lcl|AY508724.1_prot_AAR91588.1_5 [protein=putative uncharacterized protein 2] [protein_id=AAR91588.1] [location=25673..26137] [gbkey=CDS]	'127: RRLL';	1
		lcl|AY508724.1_prot_AAR91591.1_8 [protein=putative uncharacterized protein 3] [protein_id=AAR91591.1] [location=27058..27249] [gbkey=CDS]	'38: RQLF';	1
RxLX!	5
		lcl|AY508724.1_prot_AAR91584.1_1 [protein=nonstructural polyprotein] [exception=ribosomal slippage] [protein_id=AAR91584.1] [location=join(249..13382,13382..21469)] [gbkey=CDS]	'175: RELNG'; '550: RTLDA'; '701: RSLNL'; '1362: RKLMP'; '1443: RSLKA'; '1723: RVLNV'; '1930: RELSV'; '2244: RELYL'; '2448: RDLSL'; '2663: RDLGA'; '2989: RALSG'; '3183: RYLAL'; '4618: RALAA'; '4718: RELGV'; '4836: RQLLF'; '5205: RILGA'; '5462: RELHL'; '6180: RCLAV';	18
		lcl|AY508724.1_prot_AAR91585.1_2 [protein=orf1a polyprotein] [protein_id=AAR91585.1] [location=249..13397] [gbkey=CDS]	'175: RELNG'; '550: RTLDA'; '701: RSLNL'; '1362: RKLMP'; '1443: RSLKA'; '1723: RVLNV'; '1930: RELSV'; '2244: RELYL'; '2448: RDLSL'; '2663: RDLGA'; '2989: RALSG'; '3183: RYLAL';	12
		lcl|AY508724.1_prot_AAR91586.1_3 [protein=spike glycoprotein S] [protein_id=AAR91586.1] [location=21476..25243] [gbkey=CDS]	'747: RALSG'; '829: RDLIC';	2
		lcl|AY508724.1_prot_AAR91588.1_5 [protein=putative uncharacterized protein 2] [protein_id=AAR91588.1] [location=25673..26137] [gbkey=CDS]	'127: RRLLA';	1
		lcl|AY508724.1_prot_AAR91590.1_7 [protein=membrane protein M] [protein_id=AAR91590.1] [location=26382..27047] [gbkey=CDS]	'43: RFLYI'; '173: RTLSY';	2
RxLX[FILV]	3
		lcl|AY508724.1_prot_AAR91584.1_1 [protein=nonstructural polyprotein] [exception=ribosomal slippage] [protein_id=AAR91584.1] [location=join(249..13382,13382..21469)] [gbkey=CDS]	'701: RSLNL'; '1723: RVLNV'; '1930: RELSV'; '2244: RELYL'; '2448: RDLSL'; '3183: RYLAL'; '4718: RELGV'; '4836: RQLLF'; '5462: RELHL'; '6180: RCLAV';	10
		lcl|AY508724.1_prot_AAR91585.1_2 [protein=orf1a polyprotein] [protein_id=AAR91585.1] [location=249..13397] [gbkey=CDS]	'701: RSLNL'; '1723: RVLNV'; '1930: RELSV'; '2244: RELYL'; '2448: RDLSL'; '3183: RYLAL';	6
		lcl|AY508724.1_prot_AAR91590.1_7 [protein=membrane protein M] [protein_id=AAR91590.1] [location=26382..27047] [gbkey=CDS]	'43: RFLYI';	1
CETTG	0
PHQ	0
LPxTG	0
ExxxLV	1
		lcl|AY508724.1_prot_AAR91590.1_7 [protein=membrane protein M] [protein_id=AAR91590.1] [location=26382..27047] [gbkey=CDS]	'17: EQWNLV';	1
!!xSxS[DE][DE][DE]	0
!Kx[DE]	5
		lcl|AY508724.1_prot_AAR91584.1_1 [protein=nonstructural polyprotein] [exception=ribosomal slippage] [protein_id=AAR91584.1] [location=join(249..13382,13382..21469)] [gbkey=CDS]	'266: FKGE'; '1179: PKQE'; '1339: AKEE'; '1859: YKLD'; '1871: PKLD'; '1877: YKKD'; '2291: YKLD'; '2822: YKND'; '3251: GKVE'; '3329: LKVD'; '3964: AKSE'; '4174: PKSD'; '4635: IKWD'; '4640: LKYD'; '4989: PKCD'; '5217: VKTD'; '5935: FKTE'; '6263: YKIE'; '6517: YKRE'; '6654: YKLE'; '6692: LKLE';	21
		lcl|AY508724.1_prot_AAR91585.1_2 [protein=orf1a polyprotein] [protein_id=AAR91585.1] [location=249..13397] [gbkey=CDS]	'266: FKGE'; '1179: PKQE'; '1339: AKEE'; '1859: YKLD'; '1871: PKLD'; '1877: YKKD'; '2291: YKLD'; '2822: YKND'; '3251: GKVE'; '3329: LKVD'; '3964: AKSE'; '4174: PKSD';	12
		lcl|AY508724.1_prot_AAR91586.1_3 [protein=spike glycoprotein S] [protein_id=AAR91586.1] [location=21476..25243] [gbkey=CDS]	'264: LKYD'; '389: VKGD'; '1130: FKEE'; '1186: GKYE'; '1236: CKFD';	5
		lcl|AY508724.1_prot_AAR91587.1_4 [protein=putative uncharacterized protein 1] [protein_id=AAR91587.1] [location=25252..26076] [gbkey=CDS]	'18: VKID'; '180: LKED';	2
		lcl|AY508724.1_prot_AAR91593.1_10 [protein=nucleocapsid protein N] [protein_id=AAR91593.1] [location=28104..29372] [gbkey=CDS]	'61: GKEE'; '338: IKLD'; '369: PKKD';	3
[FILV][FILV]xSxS[DE][DE][DE]	0
[FILV]Kx[DE]	5
		lcl|AY508724.1_prot_AAR91584.1_1 [protein=nonstructural polyprotein] [exception=ribosomal slippage] [protein_id=AAR91584.1] [location=join(249..13382,13382..21469)] [gbkey=CDS]	'266: FKGE'; '3329: LKVD'; '4635: IKWD'; '4640: LKYD'; '5217: VKTD'; '5935: FKTE'; '6692: LKLE';	7
		lcl|AY508724.1_prot_AAR91585.1_2 [protein=orf1a polyprotein] [protein_id=AAR91585.1] [location=249..13397] [gbkey=CDS]	'266: FKGE'; '3329: LKVD';	2
		lcl|AY508724.1_prot_AAR91586.1_3 [protein=spike glycoprotein S] [protein_id=AAR91586.1] [location=21476..25243] [gbkey=CDS]	'264: LKYD'; '389: VKGD'; '1130: FKEE';	3
		lcl|AY508724.1_prot_AAR91587.1_4 [protein=putative uncharacterized protein 1] [protein_id=AAR91587.1] [location=25252..26076] [gbkey=CDS]	'18: VKID'; '180: LKED';	2
		lcl|AY508724.1_prot_AAR91593.1_10 [protein=nucleocapsid protein N] [protein_id=AAR91593.1] [location=28104..29372] [gbkey=CDS]	'338: IKLD';	1
[VI]x[VI][VI]	4
		lcl|AY508724.1_prot_AAR91584.1_1 [protein=nonstructural polyprotein] [exception=ribosomal slippage] [protein_id=AAR91584.1] [location=join(249..13382,13382..21469)] [gbkey=CDS]	'281: VKVI'; '461: INIV'; '473: VAII'; '679: IDVV'; '1021: VDIV'; '2346: ISIV'; '2515: INVI'; '2728: VNVI'; '2950: VRVV'; '4600: VPIV'; '4842: VEVV'; '5794: IGVV'; '6066: IKIV'; '6453: VSII'; '6732: VEII';	15
		lcl|AY508724.1_prot_AAR91585.1_2 [protein=orf1a polyprotein] [protein_id=AAR91585.1] [location=249..13397] [gbkey=CDS]	'281: VKVI'; '461: INIV'; '473: VAII'; '679: IDVV'; '1021: VDIV'; '2346: ISIV'; '2515: INVI'; '2728: VNVI'; '2950: VRVV';	9
		lcl|AY508724.1_prot_AAR91586.1_3 [protein=spike glycoprotein S] [protein_id=AAR91586.1] [location=21476..25243] [gbkey=CDS]	'114: VIII'; '203: IDVV'; '581: VSVI'; '1112: IGII'; '1207: IAIV';	5
		lcl|AY508724.1_prot_AAR91591.1_8 [protein=putative uncharacterized protein 3] [protein_id=AAR91591.1] [location=27058..27249] [gbkey=CDS]	'14: ILII';	1
GK[DE]x[ST]NPLxxxxLxK	0
RRRRx(5)Rx(4)RK	0
Rx[RK]RGLF	0
RxRRGLF	0
RxxRGLF	0
WxxxWx(9)W	0
KGD	2
		lcl|AY508724.1_prot_AAR91584.1_1 [protein=nonstructural polyprotein] [exception=ribosomal slippage] [protein_id=AAR91584.1] [location=join(249..13382,13382..21469)] [gbkey=CDS]	'5503: KGD';	1
		lcl|AY508724.1_prot_AAR91586.1_3 [protein=spike glycoprotein S] [protein_id=AAR91586.1] [location=21476..25243] [gbkey=CDS]	'390: KGD';	1
KGE	2
		lcl|AY508724.1_prot_AAR91584.1_1 [protein=nonstructural polyprotein] [exception=ribosomal slippage] [protein_id=AAR91584.1] [location=join(249..13382,13382..21469)] [gbkey=CDS]	'267: KGE';	1
		lcl|AY508724.1_prot_AAR91585.1_2 [protein=orf1a polyprotein] [protein_id=AAR91585.1] [location=249..13397] [gbkey=CDS]	'267: KGE';	1
[DE]xxxL[LI]	6
		lcl|AY508724.1_prot_AAR91584.1_1 [protein=nonstructural polyprotein] [exception=ribosomal slippage] [protein_id=AAR91584.1] [location=join(249..13382,13382..21469)] [gbkey=CDS]	'725: EQLQLL'; '1104: EDIQLL'; '2999: DAMNLI'; '3741: EYYPLL'; '4430: EEGNLL'; '4834: DIRQLL'; '7051: EKGRLI';	7
		lcl|AY508724.1_prot_AAR91585.1_2 [protein=orf1a polyprotein] [protein_id=AAR91585.1] [location=249..13397] [gbkey=CDS]	'725: EQLQLL'; '1104: EDIQLL'; '2999: DAMNLI'; '3741: EYYPLL';	4
		lcl|AY508724.1_prot_AAR91586.1_3 [protein=spike glycoprotein S] [protein_id=AAR91586.1] [location=21476..25243] [gbkey=CDS]	'730: ECANLL';	1
		lcl|AY508724.1_prot_AAR91589.1_6 [protein=envelope protein E] [protein_id=AAR91589.1] [location=26101..26331] [gbkey=CDS]	'8: ETGTLI';	1
		lcl|AY508724.1_prot_AAR91590.1_7 [protein=membrane protein M] [protein_id=AAR91590.1] [location=26382..27047] [gbkey=CDS]	'11: ELKQLL'; '114: ETNILL'; '214: DNIALL';	3
		lcl|AY508724.1_prot_AAR91593.1_10 [protein=nucleocapsid protein N] [protein_id=AAR91593.1] [location=28104..29372] [gbkey=CDS]	'349: DNVILL';	1
[AG]xxxxGK[ST]	1
		lcl|AY508724.1_prot_AAR91584.1_1 [protein=nonstructural polyprotein] [exception=ribosomal slippage] [protein_id=AAR91584.1] [location=join(249..13382,13382..21469)] [gbkey=CDS]	'5583: GPPGTGKS';	1
!!!!DxDxR	0
[FILV][FILV][FILV][FILV]DxDxR	0
!!!!D	6
		lcl|AY508724.1_prot_AAR91584.1_1 [protein=nonstructural polyprotein] [exception=ribosomal slippage] [protein_id=AAR91584.1] [location=join(249..13382,13382..21469)] [gbkey=CDS]	'190: FCGPD'; '195: GYPLD'; '906: FYLFD'; '925: FYPPD'; '1230: LLFAD'; '1261: YMVGD'; '1366: PICMD'; '1944: VVAID'; '2517: VIVFD'; '2546: ILLLD'; '2600: GVALD'; '2666: GACID'; '2908: PYCYD'; '2931: YVLMD'; '2995: FCGVD'; '3015: VGALD'; '3269: GLWLD'; '3423: GPFVD'; '3499: IAVLD'; '3785: LGVYD'; '4049: VVVPD'; '4248: AFAVD'; '4600: VPIVD'; '4649: LCLFD'; '4742: VYAAD'; '4983: LMGWD'; '5198: LPYPD'…	43
		lcl|AY508724.1_prot_AAR91585.1_2 [protein=orf1a polyprotein] [protein_id=AAR91585.1] [location=249..13397] [gbkey=CDS]	'190: FCGPD'; '195: GYPLD'; '906: FYLFD'; '925: FYPPD'; '1230: LLFAD'; '1261: YMVGD'; '1366: PICMD'; '1944: VVAID'; '2517: VIVFD'; '2546: ILLLD'; '2600: GVALD'; '2666: GACID'; '2908: PYCYD'; '2931: YVLMD'; '2995: FCGVD'; '3015: VGALD'; '3269: GLWLD'; '3423: GPFVD'; '3499: IAVLD'; '3785: LGVYD'; '4049: VVVPD'; '4248: AFAVD';	22
		lcl|AY508724.1_prot_AAR91586.1_3 [protein=spike glycoprotein S] [protein_id=AAR91586.1] [location=21476..25243] [gbkey=CDS]	'40: VYYPD'; '403: GVIAD'; '723: YICGD';	3
		lcl|AY508724.1_prot_AAR91587.1_4 [protein=putative uncharacterized protein 1] [protein_id=AAR91587.1] [location=25252..26076] [gbkey=CDS]	'138: PLLYD';	1
		lcl|AY508724.1_prot_AAR91592.1_9 [protein=putative uncharacterized protein 4] [protein_id=AAR91592.1] [location=27257..27625] [gbkey=CDS]	'65: FACAD';	1
		lcl|AY508724.1_prot_AAR91593.1_10 [protein=nucleocapsid protein N] [protein_id=AAR91593.1] [location=28104..29372] [gbkey=CDS]	'222: LLLLD'; '396: LPAAD';	2
!!!DxxP	2
		lcl|AY508724.1_prot_AAR91584.1_1 [protein=nonstructural polyprotein] [exception=ribosomal slippage] [protein_id=AAR91584.1] [location=join(249..13382,13382..21469)] [gbkey=CDS]	'191: CGPDGYP'; '4702: IFVDGVP'; '5231: LAIDAYP'; '6223: LLADKFP';	4
		lcl|AY508724.1_prot_AAR91585.1_2 [protein=orf1a polyprotein] [protein_id=AAR91585.1] [location=249..13397] [gbkey=CDS]	'191: CGPDGYP';	1
[FILV][FILV][FILV][FILV]D	3
		lcl|AY508724.1_prot_AAR91584.1_1 [protein=nonstructural polyprotein] [exception=ribosomal slippage] [protein_id=AAR91584.1] [location=join(249..13382,13382..21469)] [gbkey=CDS]	'2517: VIVFD'; '2546: ILLLD'; '5671: IVVFD';	3
		lcl|AY508724.1_prot_AAR91585.1_2 [protein=orf1a polyprotein] [protein_id=AAR91585.1] [location=249..13397] [gbkey=CDS]	'2517: VIVFD'; '2546: ILLLD';	2
		lcl|AY508724.1_prot_AAR91593.1_10 [protein=nucleocapsid protein N] [protein_id=AAR91593.1] [location=28104..29372] [gbkey=CDS]	'222: LLLLD';	1
[FILV][FILV][FILV]DxxP	1
		lcl|AY508724.1_prot_AAR91584.1_1 [protein=nonstructural polyprotein] [exception=ribosomal slippage] [protein_id=AAR91584.1] [location=join(249..13382,13382..21469)] [gbkey=CDS]	'4702: IFVDGVP';	1

## Sheet: BetaCoV 2c EMC_2012
Motif	Number of protein	Name of the proteins	Position: Sequence	Number of instance of the motif
Cx(13,20)Cx(5,6)Cx(9,19)Cx(10,14)Cx(4,14)C	0
KLGxGLxF[DN]	0
KxGGLxF[DN]	0
KRAR	0
KxGFFKR	0
SVSVGMKPSPRP	0
L[FL][VI]F[VIL]LE[LF]LLxF	0
LxCxE	1
		lcl|NC_019843.3_prot_YP_009047202.1_1 [gene=orf1ab] [locus_tag=G128_gp01] [db_xref=GeneID:14254602] [protein=1AB polyprotein] [exception=ribosomal slippage] [protein_id=YP_009047202.1] [location=join(279..13433,13433..21514)] [gbkey=CDS]	'4848: LFCME';	1
!PxV	4
		lcl|NC_019843.3_prot_YP_009047202.1_1 [gene=orf1ab] [locus_tag=G128_gp01] [db_xref=GeneID:14254602] [protein=1AB polyprotein] [exception=ribosomal slippage] [protein_id=YP_009047202.1] [location=join(279..13433,13433..21514)] [gbkey=CDS]	'85: GPRV'; '557: APYV'; '1061: PPQV'; '1226: YPLV'; '1381: VPYV'; '1970: PPTV'; '2850: IPDV'; '2948: FPEV'; '3117: GPIV'; '3759: FPEV'; '4110: WPLV'; '4705: GPIV'; '4716: VPFV'; '6067: WPIV'; '6246: IPIV';	15
		lcl|NC_019843.3_prot_YP_009047203.1_2 [gene=orf1ab] [locus_tag=G128_gp01] [db_xref=GeneID:14254602] [protein=1A polyprotein] [protein_id=YP_009047203.1] [location=279..13454] [gbkey=CDS]	'85: GPRV'; '557: APYV'; '1061: PPQV'; '1226: YPLV'; '1381: VPYV'; '1970: PPTV'; '2850: IPDV'; '2948: FPEV'; '3117: GPIV'; '3759: FPEV'; '4110: WPLV';	11
		lcl|NC_019843.3_prot_YP_009047204.1_3 [gene=S] [locus_tag=G128_gp02] [db_xref=GeneID:14254594] [protein=spike glycoprotein] [protein_id=YP_009047204.1] [location=21456..25517] [gbkey=CDS]	'393: PPQV'; '1206: APQV';	2
		lcl|NC_019843.3_prot_YP_009047209.1_8 [gene=E] [locus_tag=G128_gp07] [db_xref=GeneID:14254599] [protein=envelope protein] [protein_id=YP_009047209.1] [location=27590..27838] [gbkey=CDS]	'2: LPFV';	1
[FILV]PxV	3
		lcl|NC_019843.3_prot_YP_009047202.1_1 [gene=orf1ab] [locus_tag=G128_gp01] [db_xref=GeneID:14254602] [protein=1AB polyprotein] [exception=ribosomal slippage] [protein_id=YP_009047202.1] [location=join(279..13433,13433..21514)] [gbkey=CDS]	'1381: VPYV'; '2850: IPDV'; '2948: FPEV'; '3759: FPEV'; '4716: VPFV'; '6246: IPIV';	6
		lcl|NC_019843.3_prot_YP_009047203.1_2 [gene=orf1ab] [locus_tag=G128_gp01] [db_xref=GeneID:14254602] [protein=1A polyprotein] [protein_id=YP_009047203.1] [location=279..13454] [gbkey=CDS]	'1381: VPYV'; '2850: IPDV'; '2948: FPEV'; '3759: FPEV';	4
		lcl|NC_019843.3_prot_YP_009047209.1_8 [gene=E] [locus_tag=G128_gp07] [db_xref=GeneID:14254599] [protein=envelope protein] [protein_id=YP_009047209.1] [location=27590..27838] [gbkey=CDS]	'2: LPFV';	1
DGE	2
		lcl|NC_019843.3_prot_YP_009047202.1_1 [gene=orf1ab] [locus_tag=G128_gp01] [db_xref=GeneID:14254602] [protein=1AB polyprotein] [exception=ribosomal slippage] [protein_id=YP_009047202.1] [location=join(279..13433,13433..21514)] [gbkey=CDS]	'51: DGE';	1
		lcl|NC_019843.3_prot_YP_009047203.1_2 [gene=orf1ab] [locus_tag=G128_gp01] [db_xref=GeneID:14254602] [protein=1A polyprotein] [protein_id=YP_009047203.1] [location=279..13454] [gbkey=CDS]	'51: DGE';	1
DLxxL	4
		lcl|NC_019843.3_prot_YP_009047202.1_1 [gene=orf1ab] [locus_tag=G128_gp01] [db_xref=GeneID:14254602] [protein=1AB polyprotein] [exception=ribosomal slippage] [protein_id=YP_009047202.1] [location=join(279..13433,13433..21514)] [gbkey=CDS]	'671: DLAGL'; '2018: DLHTL'; '2661: DLGSL'; '3912: DLDAL'; '6342: DLKPL';	5
		lcl|NC_019843.3_prot_YP_009047203.1_2 [gene=orf1ab] [locus_tag=G128_gp01] [db_xref=GeneID:14254602] [protein=1A polyprotein] [protein_id=YP_009047203.1] [location=279..13454] [gbkey=CDS]	'671: DLAGL'; '2018: DLHTL'; '2661: DLGSL'; '3912: DLDAL';	4
		lcl|NC_019843.3_prot_YP_009047204.1_3 [gene=S] [locus_tag=G128_gp02] [db_xref=GeneID:14254594] [protein=spike glycoprotein] [protein_id=YP_009047204.1] [location=21456..25517] [gbkey=CDS]	'343: DLSQL'; '1282: DLKEL';	2
		lcl|NC_019843.3_prot_YP_009047211.1_10 [gene=N] [locus_tag=G128_gp09] [db_xref=GeneID:14254601] [protein=nucleoprotein] [protein_id=YP_009047211.1] [location=28566..29807] [gbkey=CDS]	'212: DLLYL';	1
IDA	3
		lcl|NC_019843.3_prot_YP_009047202.1_1 [gene=orf1ab] [locus_tag=G128_gp01] [db_xref=GeneID:14254602] [protein=1AB polyprotein] [exception=ribosomal slippage] [protein_id=YP_009047202.1] [location=join(279..13433,13433..21514)] [gbkey=CDS]	'938: IDA'; '2607: IDA'; '5242: IDA';	3
		lcl|NC_019843.3_prot_YP_009047203.1_2 [gene=orf1ab] [locus_tag=G128_gp01] [db_xref=GeneID:14254602] [protein=1A polyprotein] [protein_id=YP_009047203.1] [location=279..13454] [gbkey=CDS]	'938: IDA'; '2607: IDA';	2
		lcl|NC_019843.3_prot_YP_009047211.1_10 [gene=N] [locus_tag=G128_gp09] [db_xref=GeneID:14254601] [protein=nucleoprotein] [protein_id=YP_009047211.1] [location=28566..29807] [gbkey=CDS]	'355: IDA';	1
LDI	0
LDV	3
		lcl|NC_019843.3_prot_YP_009047202.1_1 [gene=orf1ab] [locus_tag=G128_gp01] [db_xref=GeneID:14254602] [protein=1AB polyprotein] [exception=ribosomal slippage] [protein_id=YP_009047202.1] [location=join(279..13433,13433..21514)] [gbkey=CDS]	'759: LDV';	1
		lcl|NC_019843.3_prot_YP_009047203.1_2 [gene=orf1ab] [locus_tag=G128_gp01] [db_xref=GeneID:14254602] [protein=1A polyprotein] [protein_id=YP_009047203.1] [location=279..13454] [gbkey=CDS]	'759: LDV';	1
		lcl|NC_019843.3_prot_YP_009047204.1_3 [gene=S] [locus_tag=G128_gp02] [db_xref=GeneID:14254594] [protein=spike glycoprotein] [protein_id=YP_009047204.1] [location=21456..25517] [gbkey=CDS]	'1058: LDV';	1
RGD	2
		lcl|NC_019843.3_prot_YP_009047202.1_1 [gene=orf1ab] [locus_tag=G128_gp01] [db_xref=GeneID:14254602] [protein=1AB polyprotein] [exception=ribosomal slippage] [protein_id=YP_009047202.1] [location=join(279..13433,13433..21514)] [gbkey=CDS]	'2595: RGD';	1
		lcl|NC_019843.3_prot_YP_009047203.1_2 [gene=orf1ab] [locus_tag=G128_gp01] [db_xref=GeneID:14254602] [protein=1A polyprotein] [protein_id=YP_009047203.1] [location=279..13454] [gbkey=CDS]	'2595: RGD';	1
RGDLxxL	0
SDI	2
		lcl|NC_019843.3_prot_YP_009047202.1_1 [gene=orf1ab] [locus_tag=G128_gp01] [db_xref=GeneID:14254602] [protein=1AB polyprotein] [exception=ribosomal slippage] [protein_id=YP_009047202.1] [location=join(279..13433,13433..21514)] [gbkey=CDS]	'3918: SDI';	1
		lcl|NC_019843.3_prot_YP_009047203.1_2 [gene=orf1ab] [locus_tag=G128_gp01] [db_xref=GeneID:14254602] [protein=1A polyprotein] [protein_id=YP_009047203.1] [location=279..13454] [gbkey=CDS]	'3918: SDI';	1
YGL	2
		lcl|NC_019843.3_prot_YP_009047202.1_1 [gene=orf1ab] [locus_tag=G128_gp01] [db_xref=GeneID:14254602] [protein=1AB polyprotein] [exception=ribosomal slippage] [protein_id=YP_009047202.1] [location=join(279..13433,13433..21514)] [gbkey=CDS]	'6654: YGL';	1
		lcl|NC_019843.3_prot_YP_009047204.1_3 [gene=S] [locus_tag=G128_gp02] [db_xref=GeneID:14254594] [protein=spike glycoprotein] [protein_id=YP_009047204.1] [location=21456..25517] [gbkey=CDS]	'1153: YGL';	1
RxLR	1
		lcl|NC_019843.3_prot_YP_009047202.1_1 [gene=orf1ab] [locus_tag=G128_gp01] [db_xref=GeneID:14254602] [protein=1AB polyprotein] [exception=ribosomal slippage] [protein_id=YP_009047202.1] [location=join(279..13433,13433..21514)] [gbkey=CDS]	'7075: RKLR';	1
[LI]xCx[DE]	1
		lcl|NC_019843.3_prot_YP_009047202.1_1 [gene=orf1ab] [locus_tag=G128_gp01] [db_xref=GeneID:14254602] [protein=1AB polyprotein] [exception=ribosomal slippage] [protein_id=YP_009047202.1] [location=join(279..13433,13433..21514)] [gbkey=CDS]	'4848: LFCME'; '6760: LWCKD';	2
Cx(5)Cx(1,)Hx(6)C	2
		lcl|NC_019843.3_prot_YP_009047202.1_1 [gene=orf1ab] [locus_tag=G128_gp01] [db_xref=GeneID:14254602] [protein=1AB polyprotein] [exception=ribosomal slippage] [protein_id=YP_009047202.1] [location=join(279..13433,13433..21514)] [gbkey=CDS]	'2896: CILPSECTMFRDAEGRMTPYCHDPTVLPGAFAYSQMRPHVRYDLYDGNMFIKFPEVVFESTLRITRTLSTQYCRFGSCEYAQEGVCITTNGSWAIFNDHHLNRPGVYCGSDFIDIVRRLAVSLFQPITYFQLTTSLVLGIGLCAFLTLLFYYINKVKRAFADYTQCAVIAVVAAVLNSLCICFVTSIPLCIVPYTALYYYATFYFTNEPAFIMHVSWYIMFGPIVPIWMTCVYTVAMCFRHFFWVLAYFSKKHVEVFTDGKLNCSFQDAASNIFVINKDTYAALRNSLTNDAYSRFLGLFNKYKYFSGAMETAAYREAAACHLAKALQTYSETGSDLLYQPPNCSITSGVLQSGLVKMSHPSGDVEACMVQVTCGSMTLNGLWLDNTVWCPR…	1
		lcl|NC_019843.3_prot_YP_009047203.1_2 [gene=orf1ab] [locus_tag=G128_gp01] [db_xref=GeneID:14254602] [protein=1A polyprotein] [protein_id=YP_009047203.1] [location=279..13454] [gbkey=CDS]	'2896: CILPSECTMFRDAEGRMTPYCHDPTVLPGAFAYSQMRPHVRYDLYDGNMFIKFPEVVFESTLRITRTLSTQYCRFGSCEYAQEGVCITTNGSWAIFNDHHLNRPGVYCGSDFIDIVRRLAVSLFQPITYFQLTTSLVLGIGLCAFLTLLFYYINKVKRAFADYTQCAVIAVVAAVLNSLCICFVTSIPLCIVPYTALYYYATFYFTNEPAFIMHVSWYIMFGPIVPIWMTCVYTVAMCFRHFFWVLAYFSKKHVEVFTDGKLNCSFQDAASNIFVINKDTYAALRNSLTNDAYSRFLGLFNKYKYFSGAMETAAYREAAACHLAKALQTYSETGSDLLYQPPNCSITSGVLQSGLVKMSHPSGDVEACMVQVTCGSMTLNGLWLDNTVWCPR…	1
!x!xxxx!	11
		lcl|NC_019843.3_prot_YP_009047202.1_1 [gene=orf1ab] [locus_tag=G128_gp01] [db_xref=GeneID:14254602] [protein=1AB polyprotein] [exception=ribosomal slippage] [protein_id=YP_009047202.1] [location=join(279..13433,13433..21514)] [gbkey=CDS]	'4: VAGVTAQG'; '12: ARGTYRAA'; '29: VSLTVPLC'; '45: LSPWFMDG'; '56: YEVVKAML'; '69: LLYVPIRL'; '83: LPGPRVYL'; '94: LIACENPF'; '114: GSLVGTTL'; '123: GKPIGMFF'; '132: YDIELVTG'; '151: GGYHYTPF'; '176: ADPKGKYA'; '190: LIGGDVTP'; '202: MCGVDGKP'; '210: ISAYAFLM'; '226: ADVEADVA'; '234: ARADDEGF'; '242: ITLKNNLY'; '253: WHVERKDV'; '261: PYPKQSIF'; '284: PHYFTLGC'; '308: LSLKQKLL'; '327: PTYIYHSA'; …	527
		lcl|NC_019843.3_prot_YP_009047203.1_2 [gene=orf1ab] [locus_tag=G128_gp01] [db_xref=GeneID:14254602] [protein=1A polyprotein] [protein_id=YP_009047203.1] [location=279..13454] [gbkey=CDS]	'4: VAGVTAQG'; '12: ARGTYRAA'; '29: VSLTVPLC'; '45: LSPWFMDG'; '56: YEVVKAML'; '69: LLYVPIRL'; '83: LPGPRVYL'; '94: LIACENPF'; '114: GSLVGTTL'; '123: GKPIGMFF'; '132: YDIELVTG'; '151: GGYHYTPF'; '176: ADPKGKYA'; '190: LIGGDVTP'; '202: MCGVDGKP'; '210: ISAYAFLM'; '226: ADVEADVA'; '234: ARADDEGF'; '242: ITLKNNLY'; '253: WHVERKDV'; '261: PYPKQSIF'; '284: PHYFTLGC'; '308: LSLKQKLL'; '327: PTYIYHSA'; …	328
		lcl|NC_019843.3_prot_YP_009047204.1_3 [gene=S] [locus_tag=G128_gp02] [db_xref=GeneID:14254594] [protein=spike glycoprotein] [protein_id=YP_009047204.1] [location=21456..25517] [gbkey=CDS]	'5: VFLLMFLL'; '19: VDVGPDSV'; '33: VDIQQTFF'; '48: IDVSKADG'; '57: IYPQGRTY'; '67: ITITYQGL'; '75: FPYQGDHG'; '85: YVYSAGHA'; '113: ANGFVVRI'; '121: GAAANSTG'; '138: ATIRKIYP'; '146: AFMLGSSV'; '154: GNFSDGKM'; '162: GRFFNHTL'; '170: VLLPDGCG'; '180: LRAFYCIL'; '232: FNLRNCTF'; '243: YNITEDEI'; '253: WFGITQTA'; '263: VHLFSSRY'; '271: VDLYGGNM'; '279: FQFATLPV'; '290: IKYYSIIP'; '309: AWAAFYVY'; …	94
		lcl|NC_019843.3_prot_YP_009047205.1_4 [gene=orf3] [locus_tag=G128_gp03] [db_xref=GeneID:14254595] [protein=NS3 protein] [protein_id=YP_009047205.1] [location=25532..25843] [gbkey=CDS]	'10: LLVFSLSL'; '19: VTASSKPL'; '35: YSGCMLRA'; '47: AQADTAGL'; '58: FRIDVPSA'; '93: VNLFDVGY';	6
		lcl|NC_019843.3_prot_YP_009047206.1_5 [gene=orf4a] [locus_tag=G128_gp04] [db_xref=GeneID:14254596] [protein=NS4A protein] [protein_id=YP_009047206.1] [location=25852..26181] [gbkey=CDS]	'4: VSLLNQIW'; '23: LYIPKPTA'; '35: LVGTSLHP'; '45: WNCQLSFA'; '64: ALAKQDAA'; '75: AWLLHKDG'; '83: GIPDGCSL';	7
		lcl|NC_019843.3_prot_YP_009047207.1_6 [gene=orf4b] [locus_tag=G128_gp05] [db_xref=GeneID:14254597] [protein=NS4B protein] [protein_id=YP_009047207.1] [location=26093..26833] [gbkey=CDS]	'6: MDVPSTSG'; '32: LRYVKRRF'; '49: VIVQPTHY'; '57: VRVTFSDP'; '82: LKPYGGQP'; '93: YHITLALL'; '111: FSPIALFL'; '121: VRFELHEF'; '129: ALLRKTLV'; '137: LNASEIYC'; '145: ANIHRFKP'; '154: YRVNTAIP'; '167: LLVQGFSL'; '178: GLPLHMSI'; '198: YIITMPCF'; '212: MFVTPLAV'; '238: YPILHHPG';	17
		lcl|NC_019843.3_prot_YP_009047208.1_7 [gene=orf5] [locus_tag=G128_gp06] [db_xref=GeneID:14254598] [protein=NS5 protein] [protein_id=YP_009047208.1] [location=26840..27514] [gbkey=CDS]	'1: MAFSASLF'; '11: VQLVPVSP'; '29: IVFTYIPA'; '38: GYVAALAV'; '47: VCLIPLLL'; '69: MVLYFLVL'; '77: YNFLLAIV'; '89: VHYPTGSC'; '97: LIAFLVIL'; '106: ILWFVDRI'; '115: FCLMLNSY'; '126: FDMRSHFI'; '144: VPVIHTKP'; '161: CSCSRCFY'; '189: VSVTDFSL'; '198: GNVSTVFV'; '212: VPLHIIAP';	17
		lcl|NC_019843.3_prot_YP_009047209.1_8 [gene=E] [locus_tag=G128_gp07] [db_xref=GeneID:14254599] [protein=envelope protein] [protein_id=YP_009047209.1] [location=27590..27838] [gbkey=CDS]	'2: LPFVQERI'; '10: GLFIVNFF'; '21: VVCAITLL'; '29: VCMAFLTA'; '39: LCVQCMTG'; '50: LLVQPALY'; '67: VKFQDSKP'; '75: PLPPDEWV';	8
		lcl|NC_019843.3_prot_YP_009047210.1_9 [gene=M] [locus_tag=G128_gp08] [db_xref=GeneID:14254600] [protein=membrane protein] [protein_id=YP_009047210.1] [location=27853..28512] [gbkey=CDS]	'12: IIAIIKDW'; '21: FAWSLIFL'; '30: ITIVLQYG'; '43: MTVYVFKM'; '51: FVLWLLWP'; '61: MALSIFSA'; '72: IDLASQII'; '81: GIVAAVSA'; '89: MMWISYFV'; '99: IRLFMRTG'; '111: FNPETNCL'; '121: VPFGGTTV'; '139: VTAVVTNG'; '148: LKMAGMHF'; '156: GACDYDRL'; '167: VTVAKPNV'; '191: GVAIYHRY'; '201: GNYRSPPI'; '210: ADIELALL';	19
		lcl|NC_019843.3_prot_YP_009047211.1_10 [gene=N] [locus_tag=G128_gp09] [db_xref=GeneID:14254601] [protein=nucleoprotein] [protein_id=YP_009047211.1] [location=28566..29807] [gbkey=CDS]	'2: ASPAAPRA'; '26: GRGRNPKP'; '44: YTGLTQHG'; '53: VPLTFPPG'; '65: LNANSTPA'; '88: GNGIKQLA'; '99: YFYYTGTG'; '109: AALPFRAV'; '120: IVWVHEDG'; '145: AIVTQFAP'; '160: FHIEGTGG'; '201: PGPSGIGA'; '209: VGGDLLYL'; '228: GKVKQSQP'; '243: AAAAKNKM'; '260: FNMVQAFG'; '272: GDLQGNFG'; '294: PQIAELAP'; '305: AFMGMSQF'; '326: VYFLRYSG'; '335: IKLDPKNP'; '348: LELLEQNI'; '400: PSVQPGPM';	23
		lcl|NC_019843.3_prot_YP_009047212.1_11 [gene=orf8b] [locus_tag=G128_gp10] [db_xref=GeneID:19910005] [protein=ORF8b protein] [protein_id=YP_009047212.1] [location=28762..29100] [gbkey=CDS]	'2: PILPLRKM'; '22: PGMELSNW'; '31: PGGTSTTL'; '49: GLLRMASF'; '57: GSMKMAPL'; '71: GRGTLTMI'; '80: LLLHNSRP'; '97: LRGLEAIV';	8
!x!xxxx!xx!	11
		lcl|NC_019843.3_prot_YP_009047202.1_1 [gene=orf1ab] [locus_tag=G128_gp01] [db_xref=GeneID:14254602] [protein=1AB polyprotein] [exception=ribosomal slippage] [protein_id=YP_009047202.1] [location=join(279..13433,13433..21514)] [gbkey=CDS]	'4: VAGVTAQGARG'; '29: VSLTVPLCGSG'; '45: LSPWFMDGENA'; '61: AMLLKKEPLLY'; '76: LAGHTRHLPGP'; '116: LVGTTLQGKPI'; '127: GMFFPYDIELV'; '176: ADPKGKYAQNL'; '191: IGGDVTPVDQY'; '202: MCGVDGKPISA'; '215: FLMAKDGITKL'; '226: ADVEADVAARA'; '242: ITLKNNLYRLV'; '253: WHVERKDVPYP'; '284: PHYFTLGCKIL'; '308: LSLKQKLLYTF'; '329: YIYHSAFIECG'; '347: LTGNAIQGFAC'; '358: GCGASYTANDV'; '374: GMIKPNALLCA'; '406:…	316
		lcl|NC_019843.3_prot_YP_009047203.1_2 [gene=orf1ab] [locus_tag=G128_gp01] [db_xref=GeneID:14254602] [protein=1A polyprotein] [protein_id=YP_009047203.1] [location=279..13454] [gbkey=CDS]	'4: VAGVTAQGARG'; '29: VSLTVPLCGSG'; '45: LSPWFMDGENA'; '61: AMLLKKEPLLY'; '76: LAGHTRHLPGP'; '116: LVGTTLQGKPI'; '127: GMFFPYDIELV'; '176: ADPKGKYAQNL'; '191: IGGDVTPVDQY'; '202: MCGVDGKPISA'; '215: FLMAKDGITKL'; '226: ADVEADVAARA'; '242: ITLKNNLYRLV'; '253: WHVERKDVPYP'; '284: PHYFTLGCKIL'; '308: LSLKQKLLYTF'; '329: YIYHSAFIECG'; '347: LTGNAIQGFAC'; '358: GCGASYTANDV'; '374: GMIKPNALLCA'; '406:…	202
		lcl|NC_019843.3_prot_YP_009047204.1_3 [gene=S] [locus_tag=G128_gp02] [db_xref=GeneID:14254594] [protein=spike glycoprotein] [protein_id=YP_009047204.1] [location=21456..25517] [gbkey=CDS]	'12: LTPTESYVDVG'; '48: IDVSKADGIIY'; '67: ITITYQGLFPY'; '82: GDMYVYSAGHA'; '113: ANGFVVRIGAA'; '138: ATIRKIYPAFM'; '154: GNFSDGKMGRF'; '169: LVLLPDGCGTL'; '182: AFYCILEPRSG'; '243: YNITEDEILEW'; '263: VHLFSSRYVDL'; '274: YGGNMFQFATL'; '285: PVYDTIKYYSI'; '311: AAFYVYKLQPL'; '329: VDGYIRRAIDC'; '349: CSYESFDVESG'; '368: AKPSGSVVEQA'; '381: VECDFSPLLSG'; '397: YNFKRLVFTNC'; '418: FSVNDFTCSQI'; '43…	56
		lcl|NC_019843.3_prot_YP_009047205.1_4 [gene=orf3] [locus_tag=G128_gp03] [db_xref=GeneID:14254595] [protein=NS3 protein] [protein_id=YP_009047205.1] [location=25532..25843] [gbkey=CDS]	'11: LVFSLSLLVTA'; '25: PLYVPEHCQNY'; '37: GCMLRACIKTA'; '53: GLYTNFRIDVP';	4
		lcl|NC_019843.3_prot_YP_009047206.1_5 [gene=orf4a] [locus_tag=G128_gp04] [db_xref=GeneID:14254596] [protein=NS4A protein] [protein_id=YP_009047206.1] [location=25852..26181] [gbkey=CDS]	'4: VSLLNQIWQKY'; '30: AKYTPLVGTSL'; '42: PVLWNCQLSFA'; '64: ALAKQDAAQRI'; '75: AWLLHKDGGIP';	5
		lcl|NC_019843.3_prot_YP_009047207.1_6 [gene=orf4b] [locus_tag=G128_gp05] [db_xref=GeneID:14254597] [protein=NS4B protein] [protein_id=YP_009047207.1] [location=26093..26833] [gbkey=CDS]	'6: MDVPSTSGTQV'; '32: LRYVKRRFSLL'; '49: VIVQPTHYVRV'; '111: FSPIALFLRNV'; '129: ALLRKTLVLNA'; '143: YCANIHRFKPV'; '159: AIPTIKDWLLV'; '178: GLPLHMSISKL'; '198: YIITMPCFRTY'; '212: MFVTPLAVDVV';	10
		lcl|NC_019843.3_prot_YP_009047208.1_7 [gene=orf5] [locus_tag=G128_gp06] [db_xref=GeneID:14254598] [protein=NS5 protein] [protein_id=YP_009047208.1] [location=26840..27514] [gbkey=CDS]	'1: MAFSASLFKPV'; '13: LVPVSPAFHRI'; '29: IVFTYIPASGY'; '40: VAALAVNVCLI'; '69: MVLYFLVLYNF'; '81: LAIVLVNGVHY'; '92: PTGSCLIAFLV'; '103: ILIILWFVDRI'; '115: FCLMLNSYIPL'; '144: VPVIHTKPLFI'; '167: FYLHSSTYIEC'; '196: LNGNVSTVFVP'; '212: VPLHIIAPSSL';	13
		lcl|NC_019843.3_prot_YP_009047209.1_8 [gene=E] [locus_tag=G128_gp07] [db_xref=GeneID:14254599] [protein=envelope protein] [protein_id=YP_009047209.1] [location=27590..27838] [gbkey=CDS]	'2: LPFVQERIGLF'; '14: VNFFIFTVVCA'; '29: VCMAFLTATRL'; '44: MTGFNTLLVQP'; '55: ALYLYNTGRSV'; '67: VKFQDSKPPLP';	6
		lcl|NC_019843.3_prot_YP_009047210.1_9 [gene=M] [locus_tag=G128_gp08] [db_xref=GeneID:14254600] [protein=membrane protein] [protein_id=YP_009047210.1] [location=27853..28512] [gbkey=CDS]	'12: IIAIIKDWNFA'; '23: WSLIFLLITIV'; '36: YGYPSRSMTVY'; '48: FKMFVLWLLWP'; '61: MALSIFSAVYP'; '72: IDLASQIISGI'; '84: AAVSAMMWISY'; '99: IRLFMRTGSWW'; '111: FNPETNCLLNV'; '122: PFGGTTVVRPL'; '141: AVVTNGHLKMA'; '153: MHFGACDYDRL'; '167: VTVAKPNVLIA'; '191: GVAIYHRYKAG';	14
		lcl|NC_019843.3_prot_YP_009047211.1_10 [gene=N] [locus_tag=G128_gp09] [db_xref=GeneID:14254601] [protein=nucleoprotein] [protein_id=YP_009047211.1] [location=28566..29807] [gbkey=CDS]	'2: ASPAAPRAVSF'; '26: GRGRNPKPRAA'; '44: YTGLTQHGKVP'; '55: LTFPPGQGVPL'; '88: GNGIKQLAPRW'; '99: YFYYTGTGPEA'; '113: FRAVKDGIVWV'; '150: FAPGTKLPKNF'; '201: PGPSGIGAVGG'; '228: GKVKQSQPKVI'; '260: FNMVQAFGLRG'; '276: GNFGDLQLNKL'; '299: LAPTASAFMGM'; '327: YFLRYSGAIKL'; '348: LELLEQNIDAY'; '400: PSVQPGPMIDV';	16
		lcl|NC_019843.3_prot_YP_009047212.1_11 [gene=orf8b] [locus_tag=G128_gp10] [db_xref=GeneID:19910005] [protein=ORF8b protein] [protein_id=YP_009047212.1] [location=28762..29100] [gbkey=CDS]	'2: PILPLRKMLGI'; '22: PGMELSNWLPG'; '49: GLLRMASFGSM'; '63: PLMLLQLLGRG'; '97: LRGLEAIVNHL';	5
!xxxx!xx!	11
		lcl|NC_019843.3_prot_YP_009047202.1_1 [gene=orf1ab] [locus_tag=G128_gp01] [db_xref=GeneID:14254602] [protein=1AB polyprotein] [exception=ribosomal slippage] [protein_id=YP_009047202.1] [location=join(279..13433,13433..21514)] [gbkey=CDS]	'1: MSFVAGVTA'; '11: GARGTYRAA'; '29: VSLTVPLCG'; '42: VEKLSPWFM'; '56: YEVVKAMLL'; '68: PLLYVPIRL'; '78: GHTRHLPGP'; '89: YLVERLIAC'; '118: GTTLQGKPI'; '129: FFPYDIELV'; '143: ILLRKYGRG'; '152: GYHYTPFHY'; '178: PKGKYAQNL'; '187: LKKLIGGDV'; '197: PVDQYMCGV'; '207: GKPISAYAF'; '217: MAKDGITKL'; '228: VEADVAARA'; '244: LKNNLYRLV'; '255: VERKDVPYP'; '278: GVENTPPHY'; '310: LKQKLLYTF'; '319: YGKESL…	498
		lcl|NC_019843.3_prot_YP_009047203.1_2 [gene=orf1ab] [locus_tag=G128_gp01] [db_xref=GeneID:14254602] [protein=1A polyprotein] [protein_id=YP_009047203.1] [location=279..13454] [gbkey=CDS]	'1: MSFVAGVTA'; '11: GARGTYRAA'; '29: VSLTVPLCG'; '42: VEKLSPWFM'; '56: YEVVKAMLL'; '68: PLLYVPIRL'; '78: GHTRHLPGP'; '89: YLVERLIAC'; '118: GTTLQGKPI'; '129: FFPYDIELV'; '143: ILLRKYGRG'; '152: GYHYTPFHY'; '178: PKGKYAQNL'; '187: LKKLIGGDV'; '197: PVDQYMCGV'; '207: GKPISAYAF'; '217: MAKDGITKL'; '228: VEADVAARA'; '244: LKNNLYRLV'; '255: VERKDVPYP'; '278: GVENTPPHY'; '310: LKQKLLYTF'; '319: YGKESL…	309
		lcl|NC_019843.3_prot_YP_009047204.1_3 [gene=S] [locus_tag=G128_gp02] [db_xref=GeneID:14254594] [protein=spike glycoprotein] [protein_id=YP_009047204.1] [location=21456..25517] [gbkey=CDS]	'1: MIHSVFLLM'; '14: PTESYVDVG'; '39: FFDKTWPRP'; '48: IDVSKADGI'; '59: PQGRTYSNI'; '69: ITYQGLFPY'; '79: GDHGDMYVY'; '89: AGHATGTTP'; '112: FANGFVVRI'; '123: AANSTGTVI'; '138: ATIRKIYPA'; '148: MLGSSVGNF'; '164: FFNHTLVLL'; '175: GCGTLLRAF'; '184: YCILEPRSG'; '196: PAGNSYTSF'; '223: ASLNSFKEY'; '232: FNLRNCTFM'; '245: ITEDEILEW'; '255: GITQTAQGV'; '265: LFSSRYVDL'; '274: YGGNMFQFA'; '285: PVYDTI…	93
		lcl|NC_019843.3_prot_YP_009047205.1_4 [gene=orf3] [locus_tag=G128_gp03] [db_xref=GeneID:14254595] [protein=NS3 protein] [protein_id=YP_009047205.1] [location=25532..25843] [gbkey=CDS]	'1: MRVQRPPTL'; '10: LLVFSLSLL'; '21: ASSKPLYVP'; '32: CQNYSGCML'; '44: IKTAQADTA'; '55: YTNFRIDVP'; '85: GPTEHVTSV';	7
		lcl|NC_019843.3_prot_YP_009047206.1_5 [gene=orf4a] [locus_tag=G128_gp04] [db_xref=GeneID:14254596] [protein=NS4A protein] [protein_id=YP_009047206.1] [location=25852..26181] [gbkey=CDS]	'6: LLNQIWQKY'; '18: PYTTCLYIP'; '32: YTPLVGTSL'; '44: LWNCQLSFA'; '66: AKQDAAQRI'; '77: LLHKDGGIP';	6
		lcl|NC_019843.3_prot_YP_009047207.1_6 [gene=orf4b] [locus_tag=G128_gp05] [db_xref=GeneID:14254597] [protein=NS4B protein] [protein_id=YP_009047207.1] [location=26093..26833] [gbkey=CDS]	'1: MEESLMDVP'; '34: YVKRRFSLL'; '51: VQPTHYVRV'; '61: FSDPNMWYL'; '81: WLKPYGGQP'; '90: VSEYHITLA'; '108: ARDFSPIAL'; '123: FELHEFALL'; '137: LNASEIYCA'; '161: PTIKDWLLV'; '175: YHSGLPLHM'; '194: VTRNYIITM'; '204: CFRTYPQQM'; '213: FVTPLAVDV'; '230: GNKQIVHSY';	15
		lcl|NC_019843.3_prot_YP_009047208.1_7 [gene=orf5] [locus_tag=G128_gp06] [db_xref=GeneID:14254598] [protein=NS5 protein] [protein_id=YP_009047208.1] [location=26840..27514] [gbkey=CDS]	'2: AFSASLFKP'; '11: VQLVPVSPA'; '30: VFTYIPASG'; '39: YVAALAVNV'; '48: CLIPLLLLL'; '61: CRRSIIRTM'; '71: LYFLVLYNF'; '80: LLAIVLVNG'; '89: VHYPTGSCL'; '98: IAFLVILII'; '108: WFVDRIRFC'; '117: LMLNSYIPL'; '138: VSSHGMVPV'; '161: CSCSRCFYL'; '175: IECTYISRF'; '186: ISLVSVTDF'; '198: GNVSTVFVP'; '214: LHIIAPSSL';	18
		lcl|NC_019843.3_prot_YP_009047209.1_8 [gene=E] [locus_tag=G128_gp07] [db_xref=GeneID:14254599] [protein=envelope protein] [protein_id=YP_009047209.1] [location=27590..27838] [gbkey=CDS]	'4: FVQERIGLF'; '13: IVNFFIFTV'; '22: VCAITLLVC'; '31: MAFLTATRL'; '46: GFNTLLVQP'; '57: YLYNTGRSV'; '69: FQDSKPPLP';	7
		lcl|NC_019843.3_prot_YP_009047210.1_9 [gene=M] [locus_tag=G128_gp08] [db_xref=GeneID:14254600] [protein=membrane protein] [protein_id=YP_009047210.1] [location=27853..28512] [gbkey=CDS]	'7: LTEAQIIAI'; '21: FAWSLIFLL'; '38: YPSRSMTVY'; '47: VFKMFVLWL'; '57: WPSSMALSI'; '66: FSAVYPIDL'; '78: IISGIVAAV'; '91: WISYFVQSI'; '101: LFMRTGSWW'; '113: PETNCLLNV'; '123: FGGTTVVRP'; '143: VTNGHLKMA'; '152: GMHFGACDY'; '164: PNEVTVAKP'; '186: YGTNSGVAI'; '195: YHRYKAGNY'; '207: PITADIELA';	17
		lcl|NC_019843.3_prot_YP_009047211.1_10 [gene=N] [locus_tag=G128_gp09] [db_xref=GeneID:14254601] [protein=nucleoprotein] [protein_id=YP_009047211.1] [location=28566..29807] [gbkey=CDS]	'1: MASPAAPRA'; '18: ITNTNLSRG'; '28: GRNPKPRAA'; '46: GLTQHGKVP'; '55: LTFPPGQGV'; '67: ANSTPAQNA'; '90: GIKQLAPRW'; '99: YFYYTGTGP'; '111: LPFRAVKDG'; '123: VHEDGATDA'; '145: AIVTQFAPG'; '193: GNSTRGTSP'; '202: GPSGIGAVG'; '211: GDLLYLDLL'; '230: VKQSQPKVI'; '260: FNMVQAFGL'; '271: PGDLQGNFG'; '286: LGTEDPRWP'; '300: APTASAFMG'; '323: GNPVYFLRY'; '334: AIKLDPKNP'; '350: LLEQNIDAY'; '400: PSVQPG…	23
		lcl|NC_019843.3_prot_YP_009047212.1_11 [gene=orf8b] [locus_tag=G128_gp10] [db_xref=GeneID:19910005] [protein=ORF8b protein] [protein_id=YP_009047212.1] [location=28762..29100] [gbkey=CDS]	'1: MPILPLRKM'; '21: IPGMELSNW'; '49: GLLRMASFG'; '59: MKMAPLMLL'; '70: LGRGTLTMI'; '92: LKTSTLRGL'; '102: AIVNHLQEP';	7
[FILV]x[FILV]xxxx[FILV]	10
		lcl|NC_019843.3_prot_YP_009047202.1_1 [gene=orf1ab] [locus_tag=G128_gp01] [db_xref=GeneID:14254602] [protein=1AB polyprotein] [exception=ribosomal slippage] [protein_id=YP_009047202.1] [location=join(279..13433,13433..21514)] [gbkey=CDS]	'88: VYLVERLI'; '287: FTLGCKIL'; '308: LSLKQKLL'; '422: FTLIFGGV'; '484: LNFVGEFV'; '531: VAVTAGPF'; '543: INVGGTGL'; '613: LLFDCVDL'; '668: FLLDLAGL'; '678: IFLRNAYV'; '691: FVVVNGKV'; '786: VTVSSNMV'; '810: VIVGDYVI'; '859: VAFGGDQV'; '1032: VEVPVEDI'; '1058: VEVPPQVV'; '1095: VTVKPKRL'; '1182: LQVGDSVL'; '1260: VVVNSQDV'; '1280: LTFSYDGL'; '1353: VGIISMPL'; '1379: VNVPYVCL'; '1429: LLVQDLRL'; …	107
		lcl|NC_019843.3_prot_YP_009047203.1_2 [gene=orf1ab] [locus_tag=G128_gp01] [db_xref=GeneID:14254602] [protein=1A polyprotein] [protein_id=YP_009047203.1] [location=279..13454] [gbkey=CDS]	'88: VYLVERLI'; '287: FTLGCKIL'; '308: LSLKQKLL'; '422: FTLIFGGV'; '484: LNFVGEFV'; '531: VAVTAGPF'; '543: INVGGTGL'; '613: LLFDCVDL'; '668: FLLDLAGL'; '678: IFLRNAYV'; '691: FVVVNGKV'; '786: VTVSSNMV'; '810: VIVGDYVI'; '859: VAFGGDQV'; '1032: VEVPVEDI'; '1058: VEVPPQVV'; '1095: VTVKPKRL'; '1182: LQVGDSVL'; '1260: VVVNSQDV'; '1280: LTFSYDGL'; '1353: VGIISMPL'; '1379: VNVPYVCL'; '1429: LLVQDLRL'; …	70
		lcl|NC_019843.3_prot_YP_009047204.1_3 [gene=S] [locus_tag=G128_gp02] [db_xref=GeneID:14254594] [protein=spike glycoprotein] [protein_id=YP_009047204.1] [location=21456..25517] [gbkey=CDS]	'5: VFLLMFLL'; '19: VDVGPDSV'; '33: VDIQQTFF'; '67: ITITYQGL'; '232: FNLRNCTF'; '279: FQFATLPV'; '527: VSIVPSTV'; '623: VGVRQQRF'; '655: VSVPVSVI'; '715: LGLVNSSL'; '788: FGVTQEYI'; '893: LLFDKVTI'; '970: IPFAQSIF'; '983: VGITQQVL'; '1260: LDLTYEML'; '1301: LGFIAGLV'; '1310: LALCVFFI';	17
		lcl|NC_019843.3_prot_YP_009047205.1_4 [gene=orf3] [locus_tag=G128_gp03] [db_xref=GeneID:14254595] [protein=NS3 protein] [protein_id=YP_009047205.1] [location=25532..25843] [gbkey=CDS]	'10: LLVFSLSL';	1
		lcl|NC_019843.3_prot_YP_009047206.1_5 [gene=orf4a] [locus_tag=G128_gp04] [db_xref=GeneID:14254596] [protein=NS4A protein] [protein_id=YP_009047206.1] [location=25852..26181] [gbkey=CDS]	'90: LYLRHSSL';	1
		lcl|NC_019843.3_prot_YP_009047207.1_6 [gene=orf4b] [locus_tag=G128_gp05] [db_xref=GeneID:14254597] [protein=NS4B protein] [protein_id=YP_009047207.1] [location=26093..26833] [gbkey=CDS]	'95: ITLALLNL'; '114: IALFLRNV'; '123: FELHEFAL'; '135: LVLNASEI'; '167: LLVQGFSL'; '217: LAVDVVSI';	6
		lcl|NC_019843.3_prot_YP_009047208.1_7 [gene=orf5] [locus_tag=G128_gp06] [db_xref=GeneID:14254598] [protein=NS5 protein] [protein_id=YP_009047208.1] [location=26840..27514] [gbkey=CDS]	'43: LAVNVCLI'; '73: FLVLYNFL'; '98: IAFLVILI'; '189: VSVTDFSL';	4
		lcl|NC_019843.3_prot_YP_009047209.1_8 [gene=E] [locus_tag=G128_gp07] [db_xref=GeneID:14254599] [protein=envelope protein] [protein_id=YP_009047209.1] [location=27590..27838] [gbkey=CDS]	'2: LPFVQERI'; '11: LFIVNFFI'; '27: LLVCMAFL';	3
		lcl|NC_019843.3_prot_YP_009047210.1_9 [gene=M] [locus_tag=G128_gp08] [db_xref=GeneID:14254600] [protein=membrane protein] [protein_id=YP_009047210.1] [location=27853..28512] [gbkey=CDS]	'25: LIFLLITI'; '45: VYVFKMFV'; '72: IDLASQII'; '121: VPFGGTTV'; '167: VTVAKPNV';	5
		lcl|NC_019843.3_prot_YP_009047211.1_10 [gene=N] [locus_tag=G128_gp09] [db_xref=GeneID:14254601] [protein=nucleoprotein] [protein_id=YP_009047211.1] [location=28566..29807] [gbkey=CDS]	'348: LELLEQNI';	1
[FILV]x[FILV]xxxx[FILV]xx[FILV]	7
		lcl|NC_019843.3_prot_YP_009047202.1_1 [gene=orf1ab] [locus_tag=G128_gp01] [db_xref=GeneID:14254602] [protein=1AB polyprotein] [exception=ribosomal slippage] [protein_id=YP_009047202.1] [location=join(279..13433,13433..21514)] [gbkey=CDS]	'308: LSLKQKLLYTF'; '490: FVVNDVVLAIL'; '668: FLLDLAGLFRI'; '691: FVVVNGKVSTL'; '786: VTVSSNMVETV'; '859: VAFGGDQVHEV'; '1032: VEVPVEDIAQV'; '1353: VGIISMPLGYV'; '1429: LLVQDLRLNKL'; '1489: VTVDGVNFRTV'; '1868: ISLSFNNLLGF'; '2159: VDLSMDKLRRV'; '2543: LLVDSSLVTSV'; '2751: FTLKGYVLATI'; '2762: IVFLCAVLMYL'; '2782: VEFYEDRILDF'; '3025: FQLTTSLVLGI'; '3041: LTLLFYYINKV'; '3064: IAVVAAVLNSL'; '3120:…	33
		lcl|NC_019843.3_prot_YP_009047203.1_2 [gene=orf1ab] [locus_tag=G128_gp01] [db_xref=GeneID:14254602] [protein=1A polyprotein] [protein_id=YP_009047203.1] [location=279..13454] [gbkey=CDS]	'308: LSLKQKLLYTF'; '490: FVVNDVVLAIL'; '668: FLLDLAGLFRI'; '691: FVVVNGKVSTL'; '786: VTVSSNMVETV'; '859: VAFGGDQVHEV'; '1032: VEVPVEDIAQV'; '1353: VGIISMPLGYV'; '1429: LLVQDLRLNKL'; '1489: VTVDGVNFRTV'; '1868: ISLSFNNLLGF'; '2159: VDLSMDKLRRV'; '2543: LLVDSSLVTSV'; '2751: FTLKGYVLATI'; '2762: IVFLCAVLMYL'; '2782: VEFYEDRILDF'; '3025: FQLTTSLVLGI'; '3041: LTLLFYYINKV'; '3064: IAVVAAVLNSL'; '3120:…	24
		lcl|NC_019843.3_prot_YP_009047204.1_3 [gene=S] [locus_tag=G128_gp02] [db_xref=GeneID:14254594] [protein=spike glycoprotein] [protein_id=YP_009047204.1] [location=21456..25517] [gbkey=CDS]	'970: IPFAQSIFYRL'; '1308: VALALCVFFIL';	2
		lcl|NC_019843.3_prot_YP_009047207.1_6 [gene=orf4b] [locus_tag=G128_gp05] [db_xref=GeneID:14254597] [protein=NS4B protein] [protein_id=YP_009047207.1] [location=26093..26833] [gbkey=CDS]	'121: VRFELHEFALL';	1
		lcl|NC_019843.3_prot_YP_009047208.1_7 [gene=orf5] [locus_tag=G128_gp06] [db_xref=GeneID:14254598] [protein=NS5 protein] [protein_id=YP_009047208.1] [location=26840..27514] [gbkey=CDS]	'43: LAVNVCLIPLL'; '73: FLVLYNFLLAI'; '100: FLVILIILWFV';	3
		lcl|NC_019843.3_prot_YP_009047209.1_8 [gene=E] [locus_tag=G128_gp07] [db_xref=GeneID:14254599] [protein=envelope protein] [protein_id=YP_009047209.1] [location=27590..27838] [gbkey=CDS]	'2: LPFVQERIGLF';	1
		lcl|NC_019843.3_prot_YP_009047210.1_9 [gene=M] [locus_tag=G128_gp08] [db_xref=GeneID:14254600] [protein=membrane protein] [protein_id=YP_009047210.1] [location=27853..28512] [gbkey=CDS]	'45: VYVFKMFVLWL'; '72: IDLASQIISGI';	2
[FILV]xxxx[FILV]xx[FILV]	11
		lcl|NC_019843.3_prot_YP_009047202.1_1 [gene=orf1ab] [locus_tag=G128_gp01] [db_xref=GeneID:14254602] [protein=1AB polyprotein] [exception=ribosomal slippage] [protein_id=YP_009047202.1] [location=join(279..13433,13433..21514)] [gbkey=CDS]	'64: LKKEPLLYV'; '83: LPGPRVYLV'; '121: LQGKPIGMF'; '190: LIGGDVTPV'; '310: LKQKLLYTF'; '347: LTGNAIQGF'; '487: VGEFVVNDV'; '514: LKGVTLDKL'; '610: FSELLFDCV'; '670: LDLAGLFRI'; '693: VVNGKVSTL'; '767: FSKKQLGLL'; '788: VSSNMVETV'; '861: FGGDQVHEV'; '889: LASSSLRTF'; '903: LSIEEFADV'; '916: VSDLLVKLL'; '929: IPDFDLDDF'; '1034: VPVEDIAQV'; '1118: VITECVTIV'; '1195: LAKNILHVV'; '1233: LVSAGIFGV'; '…	116
		lcl|NC_019843.3_prot_YP_009047203.1_2 [gene=orf1ab] [locus_tag=G128_gp01] [db_xref=GeneID:14254602] [protein=1A polyprotein] [protein_id=YP_009047203.1] [location=279..13454] [gbkey=CDS]	'64: LKKEPLLYV'; '83: LPGPRVYLV'; '121: LQGKPIGMF'; '190: LIGGDVTPV'; '310: LKQKLLYTF'; '347: LTGNAIQGF'; '487: VGEFVVNDV'; '514: LKGVTLDKL'; '610: FSELLFDCV'; '670: LDLAGLFRI'; '693: VVNGKVSTL'; '767: FSKKQLGLL'; '788: VSSNMVETV'; '861: FGGDQVHEV'; '889: LASSSLRTF'; '903: LSIEEFADV'; '916: VSDLLVKLL'; '929: IPDFDLDDF'; '1034: VPVEDIAQV'; '1118: VITECVTIV'; '1195: LAKNILHVV'; '1233: LVSAGIFGV'; '…	78
		lcl|NC_019843.3_prot_YP_009047204.1_3 [gene=S] [locus_tag=G128_gp02] [db_xref=GeneID:14254594] [protein=spike glycoprotein] [protein_id=YP_009047204.1] [location=21456..25517] [gbkey=CDS]	'2: IHSVFLLMF'; '112: FANGFVVRI'; '164: FFNHTLVLL'; '295: IIPHSIRSI'; '313: FYVYKLQPL'; '415: LSLFSVNDF'; '745: LTPRSVRSV'; '869: FNLTLLEPV'; '890: IEDLLFDKV'; '972: FAQSIFYRL'; '1070: LINGRLTTL'; '1299: IWLGFIAGL'; '1310: LALCVFFIL';	13
		lcl|NC_019843.3_prot_YP_009047205.1_4 [gene=orf3] [locus_tag=G128_gp03] [db_xref=GeneID:14254595] [protein=NS3 protein] [protein_id=YP_009047205.1] [location=25532..25843] [gbkey=CDS]	'10: LLVFSLSLL'; '90: VTSVNLFDV';	2
		lcl|NC_019843.3_prot_YP_009047206.1_5 [gene=orf4a] [locus_tag=G128_gp04] [db_xref=GeneID:14254596] [protein=NS4A protein] [protein_id=YP_009047206.1] [location=25852..26181] [gbkey=CDS]	'35: LVGTSLHPV';	1
		lcl|NC_019843.3_prot_YP_009047207.1_6 [gene=orf4b] [locus_tag=G128_gp05] [db_xref=GeneID:14254597] [protein=NS4B protein] [protein_id=YP_009047207.1] [location=26093..26833] [gbkey=CDS]	'42: LRHEDLSVI'; '123: FELHEFALL'; '142: IYCANIHRF'; '214: VTPLAVDVV';	4
		lcl|NC_019843.3_prot_YP_009047208.1_7 [gene=orf5] [locus_tag=G128_gp06] [db_xref=GeneID:14254598] [protein=NS5 protein] [protein_id=YP_009047208.1] [location=26840..27514] [gbkey=CDS]	'3: FSASLFKPV'; '45: VNVCLIPLL'; '65: IIRTMVLYF'; '75: VLYNFLLAI'; '97: LIAFLVILI'; '175: IECTYISRF'; '186: ISLVSVTDF';	7
		lcl|NC_019843.3_prot_YP_009047209.1_8 [gene=E] [locus_tag=G128_gp07] [db_xref=GeneID:14254599] [protein=envelope protein] [protein_id=YP_009047209.1] [location=27590..27838] [gbkey=CDS]	'4: FVQERIGLF'; '13: IVNFFIFTV';	2
		lcl|NC_019843.3_prot_YP_009047210.1_9 [gene=M] [locus_tag=G128_gp08] [db_xref=GeneID:14254600] [protein=membrane protein] [protein_id=YP_009047210.1] [location=27853..28512] [gbkey=CDS]	'7: LTEAQIIAI'; '21: FAWSLIFLL'; '47: VFKMFVLWL'; '74: LASQIISGI';	4
		lcl|NC_019843.3_prot_YP_009047211.1_10 [gene=N] [locus_tag=G128_gp09] [db_xref=GeneID:14254601] [protein=nucleoprotein] [protein_id=YP_009047211.1] [location=28566..29807] [gbkey=CDS]	'214: LYLDLLNRL'; '278: FGDLQLNKL';	2
		lcl|NC_019843.3_prot_YP_009047212.1_11 [gene=orf8b] [locus_tag=G128_gp10] [db_xref=GeneID:19910005] [protein=ORF8b protein] [protein_id=YP_009047212.1] [location=28762..29100] [gbkey=CDS]	'70: LGRGTLTMI'; '92: LKTSTLRGL';	2
W[ST]xCxVTCG	0
L!x![DE]	6
		lcl|NC_019843.3_prot_YP_009047202.1_1 [gene=orf1ab] [locus_tag=G128_gp01] [db_xref=GeneID:14254602] [protein=1AB polyprotein] [exception=ribosomal slippage] [protein_id=YP_009047202.1] [location=join(279..13433,13433..21514)] [gbkey=CDS]	'94: LIACE'; '190: LIGGD'; '225: LADVE'; '526: LADYD'; '1424: LVEGE'; '1488: LVTVD'; '1535: LYLAD'; '1655: LAKAE'; '1875: LLGFD'; '1902: LAEFD'; '3757: LVFPE'; '4155: LAYYE'; '4848: LFCME'; '4992: LMGWD'; '5207: LPYPD'; '5419: LATCD'; '5442: LFAAE'; '5474: LLVWE'; '6315: LPGCD'; '6517: LWDYE';	20
		lcl|NC_019843.3_prot_YP_009047203.1_2 [gene=orf1ab] [locus_tag=G128_gp01] [db_xref=GeneID:14254602] [protein=1A polyprotein] [protein_id=YP_009047203.1] [location=279..13454] [gbkey=CDS]	'94: LIACE'; '190: LIGGD'; '225: LADVE'; '526: LADYD'; '1424: LVEGE'; '1488: LVTVD'; '1535: LYLAD'; '1655: LAKAE'; '1875: LLGFD'; '1902: LAEFD'; '3757: LVFPE'; '4155: LAYYE';	12
		lcl|NC_019843.3_prot_YP_009047204.1_3 [gene=S] [locus_tag=G128_gp02] [db_xref=GeneID:14254594] [protein=spike glycoprotein] [protein_id=YP_009047204.1] [location=21456..25517] [gbkey=CDS]	'284: LPVYD';	1
		lcl|NC_019843.3_prot_YP_009047205.1_4 [gene=orf3] [locus_tag=G128_gp03] [db_xref=GeneID:14254595] [protein=NS3 protein] [protein_id=YP_009047205.1] [location=25532..25843] [gbkey=CDS]	'26: LYVPE';	1
		lcl|NC_019843.3_prot_YP_009047208.1_7 [gene=orf5] [locus_tag=G128_gp06] [db_xref=GeneID:14254598] [protein=NS5 protein] [protein_id=YP_009047208.1] [location=26840..27514] [gbkey=CDS]	'107: LWFVD';	1
		lcl|NC_019843.3_prot_YP_009047211.1_10 [gene=N] [locus_tag=G128_gp09] [db_xref=GeneID:14254601] [protein=nucleoprotein] [protein_id=YP_009047211.1] [location=28566..29807] [gbkey=CDS]	'213: LLYLD';	1
L[FILV]x[FILV][DE]	3
		lcl|NC_019843.3_prot_YP_009047202.1_1 [gene=orf1ab] [locus_tag=G128_gp01] [db_xref=GeneID:14254602] [protein=1AB polyprotein] [exception=ribosomal slippage] [protein_id=YP_009047202.1] [location=join(279..13433,13433..21514)] [gbkey=CDS]	'1488: LVTVD'; '1875: LLGFD';	2
		lcl|NC_019843.3_prot_YP_009047203.1_2 [gene=orf1ab] [locus_tag=G128_gp01] [db_xref=GeneID:14254602] [protein=1A polyprotein] [protein_id=YP_009047203.1] [location=279..13454] [gbkey=CDS]	'1488: LVTVD'; '1875: LLGFD';	2
		lcl|NC_019843.3_prot_YP_009047211.1_10 [gene=N] [locus_tag=G128_gp09] [db_xref=GeneID:14254601] [protein=nucleoprotein] [protein_id=YP_009047211.1] [location=28566..29807] [gbkey=CDS]	'213: LLYLD';	1
L[LI][DEN][LF][DE]	0
PWxxW	1
		lcl|NC_019843.3_prot_YP_009047204.1_3 [gene=S] [locus_tag=G128_gp02] [db_xref=GeneID:14254594] [protein=spike glycoprotein] [protein_id=YP_009047204.1] [location=21456..25517] [gbkey=CDS]	'1296: PWYIW';	1
[GE][KR]Q[GE]RL	0
[RK]RQ[RK]RF	0
[LM]VxSxVxA	0
KKKRGLF	0
[QE][ST]RGLF	0
KSS[RG]LF	0
RSS[RG]LF	0
[KR]xTQT	0
G[IV]QVD	0
DSGxxS	2
		lcl|NC_019843.3_prot_YP_009047202.1_1 [gene=orf1ab] [locus_tag=G128_gp01] [db_xref=GeneID:14254602] [protein=1AB polyprotein] [exception=ribosomal slippage] [protein_id=YP_009047202.1] [location=join(279..13433,13433..21514)] [gbkey=CDS]	'604: DSGVSS'; '1774: DSGTVS'; '3955: DSGDTS';	3
		lcl|NC_019843.3_prot_YP_009047203.1_2 [gene=orf1ab] [locus_tag=G128_gp01] [db_xref=GeneID:14254602] [protein=1A polyprotein] [protein_id=YP_009047203.1] [location=279..13454] [gbkey=CDS]	'604: DSGVSS'; '1774: DSGTVS'; '3955: DSGDTS';	3
[ENT][HNPS][ILV]Y[ADEG]	0
EDLY	0
EHIYD	0
EHLYA	0
ENIYE	0
EPIYA	0
EPIYG	0
EPLYA	0
EPVYA	0
ESIYE	0
NPLYE	0
TPLYA	0
RxLx[EQD]	4
		lcl|NC_019843.3_prot_YP_009047202.1_1 [gene=orf1ab] [locus_tag=G128_gp01] [db_xref=GeneID:14254602] [protein=1AB polyprotein] [exception=ribosomal slippage] [protein_id=YP_009047202.1] [location=join(279..13433,13433..21514)] [gbkey=CDS]	'630: RILQD'; '1715: RQLVE';	2
		lcl|NC_019843.3_prot_YP_009047203.1_2 [gene=orf1ab] [locus_tag=G128_gp01] [db_xref=GeneID:14254602] [protein=1A polyprotein] [protein_id=YP_009047203.1] [location=279..13454] [gbkey=CDS]	'630: RILQD'; '1715: RQLVE';	2
		lcl|NC_019843.3_prot_YP_009047204.1_3 [gene=S] [locus_tag=G128_gp02] [db_xref=GeneID:14254594] [protein=spike glycoprotein] [protein_id=YP_009047204.1] [location=21456..25517] [gbkey=CDS]	'505: RLLSD';	1
		lcl|NC_019843.3_prot_YP_009047210.1_9 [gene=M] [locus_tag=G128_gp08] [db_xref=GeneID:14254600] [protein=membrane protein] [protein_id=YP_009047210.1] [location=27853..28512] [gbkey=CDS]	'130: RPLVE';	1
N{P}[ST]{P}	9
		lcl|NC_019843.3_prot_YP_009047202.1_1 [gene=orf1ab] [locus_tag=G128_gp01] [db_xref=GeneID:14254602] [protein=1AB polyprotein] [exception=ribosomal slippage] [protein_id=YP_009047202.1] [location=join(279..13433,13433..21514)] [gbkey=CDS]	'113: NGSL'; '164: NTSC'; '343: NDSW'; '780: NSTT'; '1094: NVTV'; '1350: NKSV'; '1459: NSTA'; '1540: NLTA'; '1638: NCTF'; '1998: NVSF'; '2250: NRSA'; '2451: NATD'; '2576: NVTR'; '2641: NESY'; '2985: NGSW'; '3158: NCSF'; '3238: NCSI'; '3310: NHSF'; '3383: NYTI'; '3419: NGTH'; '3473: NRTS'; '3813: NLTA'; '4107: NLTW'; '4151: NTSS'; '4247: NSSV'; '4255: NFTV'; '4678: NCTD'; '4867: NASE'; '5081: NVSA…	40
		lcl|NC_019843.3_prot_YP_009047203.1_2 [gene=orf1ab] [locus_tag=G128_gp01] [db_xref=GeneID:14254602] [protein=1A polyprotein] [protein_id=YP_009047203.1] [location=279..13454] [gbkey=CDS]	'113: NGSL'; '164: NTSC'; '343: NDSW'; '780: NSTT'; '1094: NVTV'; '1350: NKSV'; '1459: NSTA'; '1540: NLTA'; '1638: NCTF'; '1998: NVSF'; '2250: NRSA'; '2451: NATD'; '2576: NVTR'; '2641: NESY'; '2985: NGSW'; '3158: NCSF'; '3238: NCSI'; '3310: NHSF'; '3383: NYTI'; '3419: NGTH'; '3473: NRTS'; '3813: NLTA'; '4107: NLTW'; '4151: NTSS'; '4247: NSSV'; '4255: NFTV'; '4385: NESG';	27
		lcl|NC_019843.3_prot_YP_009047204.1_3 [gene=S] [locus_tag=G128_gp02] [db_xref=GeneID:14254594] [protein=spike glycoprotein] [protein_id=YP_009047204.1] [location=21456..25517] [gbkey=CDS]	'66: NITI'; '104: NYSQ'; '125: NSTG'; '155: NFSD'; '166: NHTL'; '222: NASL'; '236: NCTF'; '244: NITE'; '410: NLTK'; '487: NLTT'; '592: NDTK'; '619: NCTA'; '719: NSSL'; '774: NSSY'; '785: NFSF'; '870: NLTL'; '1176: NNTR'; '1213: NIST'; '1225: NSTG'; '1241: NVST'; '1256: NTTL'; '1277: NESY'; '1288: NYTY';	23
		lcl|NC_019843.3_prot_YP_009047205.1_4 [gene=orf3] [locus_tag=G128_gp03] [db_xref=GeneID:14254595] [protein=NS3 protein] [protein_id=YP_009047205.1] [location=25532..25843] [gbkey=CDS]	'34: NYSG';	1
		lcl|NC_019843.3_prot_YP_009047206.1_5 [gene=orf4a] [locus_tag=G128_gp04] [db_xref=GeneID:14254596] [protein=NS4A protein] [protein_id=YP_009047206.1] [location=25852..26181] [gbkey=CDS]	'60: NSTK';	1
		lcl|NC_019843.3_prot_YP_009047207.1_6 [gene=orf4b] [locus_tag=G128_gp05] [db_xref=GeneID:14254597] [protein=NS4B protein] [protein_id=YP_009047207.1] [location=26093..26833] [gbkey=CDS]	'101: NLTD'; '138: NASE';	2
		lcl|NC_019843.3_prot_YP_009047208.1_7 [gene=orf5] [locus_tag=G128_gp06] [db_xref=GeneID:14254598] [protein=NS5 protein] [protein_id=YP_009047208.1] [location=26840..27514] [gbkey=CDS]	'199: NVST';	1
		lcl|NC_019843.3_prot_YP_009047210.1_9 [gene=M] [locus_tag=G128_gp08] [db_xref=GeneID:14254600] [protein=membrane protein] [protein_id=YP_009047210.1] [location=27853..28512] [gbkey=CDS]	'3: NMTQ';	1
		lcl|NC_019843.3_prot_YP_009047211.1_10 [gene=N] [locus_tag=G128_gp09] [db_xref=GeneID:14254601] [protein=nucleoprotein] [protein_id=YP_009047211.1] [location=28566..29807] [gbkey=CDS]	'22: NLSR'; '38: NNTV'; '142: NDSA'; '181: NSSR'; '194: NSTR';	5
AxxxAxxxAxxxW	0
VxxxIxxLxxxL	0
+++xx+	0
++x+	6
		lcl|NC_019843.3_prot_YP_009047202.1_1 [gene=orf1ab] [locus_tag=G128_gp01] [db_xref=GeneID:14254602] [protein=1AB polyprotein] [exception=ribosomal slippage] [protein_id=YP_009047202.1] [location=join(279..13433,13433..21514)] [gbkey=CDS]	'1100: KRLR'; '1292: RKAK'; '1411: KHVR'; '2063: RKVK'; '2383: KRNR'; '3614: KHKH'; '4008: KKAK'; '4740: HRHR'; '6572: RKIK'; '7075: RKLR';	10
		lcl|NC_019843.3_prot_YP_009047203.1_2 [gene=orf1ab] [locus_tag=G128_gp01] [db_xref=GeneID:14254602] [protein=1A polyprotein] [protein_id=YP_009047203.1] [location=279..13454] [gbkey=CDS]	'1100: KRLR'; '1292: RKAK'; '1411: KHVR'; '2063: RKVK'; '2383: KRNR'; '3614: KHKH'; '4008: KKAK';	7
		lcl|NC_019843.3_prot_YP_009047204.1_3 [gene=S] [locus_tag=G128_gp02] [db_xref=GeneID:14254594] [protein=spike glycoprotein] [protein_id=YP_009047204.1] [location=21456..25517] [gbkey=CDS]	'1348: HKVH';	1
		lcl|NC_019843.3_prot_YP_009047207.1_6 [gene=orf4b] [locus_tag=G128_gp05] [db_xref=GeneID:14254597] [protein=NS4B protein] [protein_id=YP_009047207.1] [location=26093..26833] [gbkey=CDS]	'19: RKAR'; '23: KRSH'; '30: KKLR'; '73: HHLH'; '148: HRFK';	5
		lcl|NC_019843.3_prot_YP_009047210.1_9 [gene=M] [locus_tag=G128_gp08] [db_xref=GeneID:14254600] [protein=membrane protein] [protein_id=YP_009047210.1] [location=27853..28512] [gbkey=CDS]	'196: HRYK';	1
		lcl|NC_019843.3_prot_YP_009047211.1_10 [gene=N] [locus_tag=G128_gp09] [db_xref=GeneID:14254601] [protein=nucleoprotein] [protein_id=YP_009047211.1] [location=28566..29807] [gbkey=CDS]	'251: RHKR'; '363: KKEK';	2
KKTK	0
GPG[RQ]	0
KRIHIGPGRAFYTT	0
[GD]DIWK	0
LxxLL	6
		lcl|NC_019843.3_prot_YP_009047202.1_1 [gene=orf1ab] [locus_tag=G128_gp01] [db_xref=GeneID:14254602] [protein=1AB polyprotein] [exception=ribosomal slippage] [protein_id=YP_009047202.1] [location=join(279..13433,13433..21514)] [gbkey=CDS]	'885: LDTLL'; '920: LVKLL'; '1436: LNKLL'; '2175: LRLLL'; '3598: LFPLL'; '4167: LMALL';	6
		lcl|NC_019843.3_prot_YP_009047203.1_2 [gene=orf1ab] [locus_tag=G128_gp01] [db_xref=GeneID:14254602] [protein=1A polyprotein] [protein_id=YP_009047203.1] [location=279..13454] [gbkey=CDS]	'885: LDTLL'; '920: LVKLL'; '1436: LNKLL'; '2175: LRLLL'; '3598: LFPLL'; '4167: LMALL';	6
		lcl|NC_019843.3_prot_YP_009047204.1_3 [gene=S] [locus_tag=G128_gp02] [db_xref=GeneID:14254594] [protein=spike glycoprotein] [protein_id=YP_009047204.1] [location=21456..25517] [gbkey=CDS]	'8: LMFLL'; '321: LTFLL'; '411: LTKLL';	3
		lcl|NC_019843.3_prot_YP_009047208.1_7 [gene=orf5] [locus_tag=G128_gp06] [db_xref=GeneID:14254598] [protein=NS5 protein] [protein_id=YP_009047208.1] [location=26840..27514] [gbkey=CDS]	'49: LIPLL';	1
		lcl|NC_019843.3_prot_YP_009047210.1_9 [gene=M] [locus_tag=G128_gp08] [db_xref=GeneID:14254600] [protein=membrane protein] [protein_id=YP_009047210.1] [location=27853..28512] [gbkey=CDS]	'25: LIFLL';	1
		lcl|NC_019843.3_prot_YP_009047212.1_11 [gene=orf8b] [locus_tag=G128_gp10] [db_xref=GeneID:19910005] [protein=ORF8b protein] [protein_id=YP_009047212.1] [location=28762..29100] [gbkey=CDS]	'66: LLQLL';	1
Cx(2)Cx(6)Wx(3)Dx(5)Hx(6)C	0
xYxDx	4
		lcl|NC_019843.3_prot_YP_009047202.1_1 [gene=orf1ab] [locus_tag=G128_gp01] [db_xref=GeneID:14254602] [protein=1AB polyprotein] [exception=ribosomal slippage] [protein_id=YP_009047202.1] [location=join(279..13433,13433..21514)] [gbkey=CDS]	'1448: CYKDS'; '1473: AYLDS'; '2022: LYVDP'; '2458: YYVDS'; '2784: FYEDR'; '4263: AYLDF'; '4666: KYWDQ'; '4983: LYKDV'; '5208: PYPDP'; '5269: LYKDL'; '5298: FYRDL'; '5514: DYSDA'; '6257: HYFDA'; '6535: KYTDI'; '6665: VYGDF';	15
		lcl|NC_019843.3_prot_YP_009047203.1_2 [gene=orf1ab] [locus_tag=G128_gp01] [db_xref=GeneID:14254602] [protein=1A polyprotein] [protein_id=YP_009047203.1] [location=279..13454] [gbkey=CDS]	'1448: CYKDS'; '1473: AYLDS'; '2022: LYVDP'; '2458: YYVDS'; '2784: FYEDR'; '4263: AYLDF';	6
		lcl|NC_019843.3_prot_YP_009047204.1_3 [gene=S] [locus_tag=G128_gp02] [db_xref=GeneID:14254594] [protein=spike glycoprotein] [protein_id=YP_009047204.1] [location=21456..25517] [gbkey=CDS]	'17: SYVDV'; '269: RYVDL'; '641: YYSDD'; '908: GYDDC'; '1279: SYIDL';	5
		lcl|NC_019843.3_prot_YP_009047211.1_10 [gene=N] [locus_tag=G128_gp09] [db_xref=GeneID:14254601] [protein=nucleoprotein] [protein_id=YP_009047211.1] [location=28566..29807] [gbkey=CDS]	'214: LYLDL';	1
PxxP	7
		lcl|NC_019843.3_prot_YP_009047202.1_1 [gene=orf1ab] [locus_tag=G128_gp01] [db_xref=GeneID:14254602] [protein=1AB polyprotein] [exception=ribosomal slippage] [protein_id=YP_009047202.1] [location=join(279..13433,13433..21514)] [gbkey=CDS]	'1052: PVVP'; '1068: PSAP'; '1555: PVDP'; '1967: PVEP'; '2851: PDVP'; '3118: PIVP'; '3346: PSTP'; '3640: PTTP'; '4204: PKGP'; '5975: PGYP'; '6294: PKYP';	11
		lcl|NC_019843.3_prot_YP_009047203.1_2 [gene=orf1ab] [locus_tag=G128_gp01] [db_xref=GeneID:14254602] [protein=1A polyprotein] [protein_id=YP_009047203.1] [location=279..13454] [gbkey=CDS]	'1052: PVVP'; '1068: PSAP'; '1555: PVDP'; '1967: PVEP'; '2851: PDVP'; '3118: PIVP'; '3346: PSTP'; '3640: PTTP'; '4204: PKGP';	9
		lcl|NC_019843.3_prot_YP_009047204.1_3 [gene=S] [locus_tag=G128_gp02] [db_xref=GeneID:14254594] [protein=spike glycoprotein] [protein_id=YP_009047204.1] [location=21456..25517] [gbkey=CDS]	'739: PDTP'; '860: PIIP';	2
		lcl|NC_019843.3_prot_YP_009047208.1_7 [gene=orf5] [locus_tag=G128_gp06] [db_xref=GeneID:14254598] [protein=NS5 protein] [protein_id=YP_009047208.1] [location=26840..27514] [gbkey=CDS]	'15: PVSP';	1
		lcl|NC_019843.3_prot_YP_009047209.1_8 [gene=E] [locus_tag=G128_gp07] [db_xref=GeneID:14254599] [protein=envelope protein] [protein_id=YP_009047209.1] [location=27590..27838] [gbkey=CDS]	'74: PPLP';	1
		lcl|NC_019843.3_prot_YP_009047211.1_10 [gene=N] [locus_tag=G128_gp09] [db_xref=GeneID:14254601] [protein=nucleoprotein] [protein_id=YP_009047211.1] [location=28566..29807] [gbkey=CDS]	'4: PAAP'; '291: PRWP'; '339: PKNP';	3
		lcl|NC_019843.3_prot_YP_009047212.1_11 [gene=orf8b] [locus_tag=G128_gp10] [db_xref=GeneID:19910005] [protein=ORF8b protein] [protein_id=YP_009047212.1] [location=28762..29100] [gbkey=CDS]	'2: PILP';	1
YxYxx!	5
		lcl|NC_019843.3_prot_YP_009047202.1_1 [gene=orf1ab] [locus_tag=G128_gp01] [db_xref=GeneID:14254602] [protein=1AB polyprotein] [exception=ribosomal slippage] [protein_id=YP_009047202.1] [location=join(279..13433,13433..21514)] [gbkey=CDS]	'153: YHYTPF'; '329: YIYHSA'; '431: YAYFGC'; '1888: YTYSFL'; '3093: YYYATF'; '3198: YKYFSG'; '3706: YTYSIG'; '4616: YSYLMP'; '4724: YHYKEL'; '4831: YNYYSY'; '5851: YQYVIF'; '6143: YVYNPF'; '6585: YAYFNG'; '6606: YLYKKV';	14
		lcl|NC_019843.3_prot_YP_009047203.1_2 [gene=orf1ab] [locus_tag=G128_gp01] [db_xref=GeneID:14254602] [protein=1A polyprotein] [protein_id=YP_009047203.1] [location=279..13454] [gbkey=CDS]	'153: YHYTPF'; '329: YIYHSA'; '431: YAYFGC'; '1888: YTYSFL'; '3093: YYYATF'; '3198: YKYFSG'; '3706: YTYSIG';	7
		lcl|NC_019843.3_prot_YP_009047204.1_3 [gene=S] [locus_tag=G128_gp02] [db_xref=GeneID:14254594] [protein=spike glycoprotein] [protein_id=YP_009047204.1] [location=21456..25517] [gbkey=CDS]	'85: YVYSAG';	1
		lcl|NC_019843.3_prot_YP_009047209.1_8 [gene=E] [locus_tag=G128_gp07] [db_xref=GeneID:14254599] [protein=envelope protein] [protein_id=YP_009047209.1] [location=27590..27838] [gbkey=CDS]	'57: YLYNTG';	1
		lcl|NC_019843.3_prot_YP_009047211.1_10 [gene=N] [locus_tag=G128_gp09] [db_xref=GeneID:14254601] [protein=nucleoprotein] [protein_id=YP_009047211.1] [location=28566..29807] [gbkey=CDS]	'99: YFYYTG';	1
YxYxx[FILV]	2
		lcl|NC_019843.3_prot_YP_009047202.1_1 [gene=orf1ab] [locus_tag=G128_gp01] [db_xref=GeneID:14254602] [protein=1AB polyprotein] [exception=ribosomal slippage] [protein_id=YP_009047202.1] [location=join(279..13433,13433..21514)] [gbkey=CDS]	'153: YHYTPF'; '1888: YTYSFL'; '3093: YYYATF'; '4724: YHYKEL'; '5851: YQYVIF'; '6143: YVYNPF'; '6606: YLYKKV';	7
		lcl|NC_019843.3_prot_YP_009047203.1_2 [gene=orf1ab] [locus_tag=G128_gp01] [db_xref=GeneID:14254602] [protein=1A polyprotein] [protein_id=YP_009047203.1] [location=279..13454] [gbkey=CDS]	'153: YHYTPF'; '1888: YTYSFL'; '3093: YYYATF';	3
NYx[EK]C[LI][KIR][NT]APYID	0
[RKY]xxPxxP	1
		lcl|NC_019843.3_prot_YP_009047211.1_10 [gene=N] [locus_tag=G128_gp09] [db_xref=GeneID:14254601] [protein=nucleoprotein] [protein_id=YP_009047211.1] [location=28566..29807] [gbkey=CDS]	'336: KLDPKNP';	1
PxxPx[KR]	1
		lcl|NC_019843.3_prot_YP_009047212.1_11 [gene=orf8b] [locus_tag=G128_gp10] [db_xref=GeneID:19910005] [protein=ORF8b protein] [protein_id=YP_009047212.1] [location=28762..29100] [gbkey=CDS]	'2: PILPLR';	1
xx[PV]xxP	8
		lcl|NC_019843.3_prot_YP_009047202.1_1 [gene=orf1ab] [locus_tag=G128_gp01] [db_xref=GeneID:14254602] [protein=1AB polyprotein] [exception=ribosomal slippage] [protein_id=YP_009047202.1] [location=join(279..13433,13433..21514)] [gbkey=CDS]	'258: KDVPYP'; '759: LDVILP'; '1030: QPVEVP'; '1050: ETPVVP'; '1056: DTVEVP'; '1063: QVVKLP'; '1200: LHVVGP'; '1227: PLVVTP'; '1272: TIVDIP'; '1377: RRVNVP'; '1553: YGPVDP'; '1789: TDVLFP'; '1965: STPVEP'; '2849: RIPDVP'; '3116: FGPIVP'; '3281: NTVWCP'; '3287: RHVMCP'; '3341: VDVANP'; '3377: TVVMRP'; '3635: NIVYEP'; '4057: LRVVIP'; '4069: QVVTYP'; '4202: AGPKGP'; '4332: KFVQIP'; '4339: QCVRDP'; '…	37
		lcl|NC_019843.3_prot_YP_009047203.1_2 [gene=orf1ab] [locus_tag=G128_gp01] [db_xref=GeneID:14254602] [protein=1A polyprotein] [protein_id=YP_009047203.1] [location=279..13454] [gbkey=CDS]	'258: KDVPYP'; '759: LDVILP'; '1030: QPVEVP'; '1050: ETPVVP'; '1056: DTVEVP'; '1063: QVVKLP'; '1200: LHVVGP'; '1227: PLVVTP'; '1272: TIVDIP'; '1377: RRVNVP'; '1553: YGPVDP'; '1789: TDVLFP'; '1965: STPVEP'; '2849: RIPDVP'; '3116: FGPIVP'; '3281: NTVWCP'; '3287: RHVMCP'; '3341: VDVANP'; '3377: TVVMRP'; '3635: NIVYEP'; '4057: LRVVIP'; '4069: QVVTYP'; '4202: AGPKGP'; '4332: KFVQIP'; '4339: QCVRDP';	25
		lcl|NC_019843.3_prot_YP_009047204.1_3 [gene=S] [locus_tag=G128_gp02] [db_xref=GeneID:14254594] [protein=spike glycoprotein] [protein_id=YP_009047204.1] [location=21456..25517] [gbkey=CDS]	'168: TLVLLP'; '653: ACVSVP'; '737: ALPDTP'; '858: SSPIIP'; '932: YKVLPP'; '1126: FVVNAP';	6
		lcl|NC_019843.3_prot_YP_009047205.1_4 [gene=orf3] [locus_tag=G128_gp03] [db_xref=GeneID:14254595] [protein=NS3 protein] [protein_id=YP_009047205.1] [location=25532..25843] [gbkey=CDS]	'1: MRVQRP';	1
		lcl|NC_019843.3_prot_YP_009047208.1_7 [gene=orf5] [locus_tag=G128_gp06] [db_xref=GeneID:14254598] [protein=NS5 protein] [protein_id=YP_009047208.1] [location=26840..27514] [gbkey=CDS]	'13: LVPVSP'; '87: NGVHYP'; '201: STVFVP';	3
		lcl|NC_019843.3_prot_YP_009047209.1_8 [gene=E] [locus_tag=G128_gp07] [db_xref=GeneID:14254599] [protein=envelope protein] [protein_id=YP_009047209.1] [location=27590..27838] [gbkey=CDS]	'72: SKPPLP';	1
		lcl|NC_019843.3_prot_YP_009047210.1_9 [gene=M] [locus_tag=G128_gp08] [db_xref=GeneID:14254600] [protein=membrane protein] [protein_id=YP_009047210.1] [location=27853..28512] [gbkey=CDS]	'126: TTVVRP'; '167: VTVAKP';	2
		lcl|NC_019843.3_prot_YP_009047211.1_10 [gene=N] [locus_tag=G128_gp09] [db_xref=GeneID:14254601] [protein=nucleoprotein] [protein_id=YP_009047211.1] [location=28566..29807] [gbkey=CDS]	'2: ASPAAP'; '289: EDPRWP'; '337: LDPKNP';	3
[ILV]QxxxRGxxx[RK]	0
Ax(3)IQx(2)FRx(4)KK	0
LRGG	0
Yxx[LI]x(6,8)Yxx[LI]	0
[SIVL]xYxx[IVL]	5
		lcl|NC_019843.3_prot_YP_009047202.1_1 [gene=orf1ab] [locus_tag=G128_gp01] [db_xref=GeneID:14254602] [protein=1AB polyprotein] [exception=ribosomal slippage] [protein_id=YP_009047202.1] [location=join(279..13433,13433..21514)] [gbkey=CDS]	'69: LLYVPI'; '211: SAYAFL'; '550: LQYAAI'; '624: STYFLV'; '1381: VPYVCL'; '2532: VYYSQV'; '2769: LMYLCL'; '2878: VCYTPI'; '3022: ITYFQL'; '3087: VPYTAL'; '3573: STYVII'; '3631: LTYANI'; '3767: LLYTCL'; '4071: VTYPSL'; '4614: SYYSYL'; '5253: IEYQNV'; '5585: SKYVTV'; '5849: SEYQYV'; '5957: VPYSRV'; '6202: IEYPYI'; '6368: IDYVPL'; '6511: ICYKFV';	22
		lcl|NC_019843.3_prot_YP_009047203.1_2 [gene=orf1ab] [locus_tag=G128_gp01] [db_xref=GeneID:14254602] [protein=1A polyprotein] [protein_id=YP_009047203.1] [location=279..13454] [gbkey=CDS]	'69: LLYVPI'; '211: SAYAFL'; '550: LQYAAI'; '624: STYFLV'; '1381: VPYVCL'; '2532: VYYSQV'; '2769: LMYLCL'; '2878: VCYTPI'; '3022: ITYFQL'; '3087: VPYTAL'; '3573: STYVII'; '3631: LTYANI'; '3767: LLYTCL'; '4071: VTYPSL';	14
		lcl|NC_019843.3_prot_YP_009047204.1_3 [gene=S] [locus_tag=G128_gp02] [db_xref=GeneID:14254594] [protein=spike glycoprotein] [protein_id=YP_009047204.1] [location=21456..25517] [gbkey=CDS]	'69: ITYQGL'; '268: SRYVDL'; '290: IKYYSI'; '495: LKYSYI'; '702: STYGPL'; '775: SSYFKL'; '1209: VTYQNI'; '1262: LTYEML';	8
		lcl|NC_019843.3_prot_YP_009047208.1_7 [gene=orf5] [locus_tag=G128_gp06] [db_xref=GeneID:14254598] [protein=NS5 protein] [protein_id=YP_009047208.1] [location=26840..27514] [gbkey=CDS]	'70: VLYFLV';	1
		lcl|NC_019843.3_prot_YP_009047211.1_10 [gene=N] [locus_tag=G128_gp09] [db_xref=GeneID:14254601] [protein=nucleoprotein] [protein_id=YP_009047211.1] [location=28566..29807] [gbkey=CDS]	'42: SWYTGL'; '213: LLYLDL';	2
[RK]xxxx!x!	10
		lcl|NC_019843.3_prot_YP_009047202.1_1 [gene=orf1ab] [locus_tag=G128_gp01] [db_xref=GeneID:14254602] [protein=1AB polyprotein] [exception=ribosomal slippage] [protein_id=YP_009047202.1] [location=join(279..13433,13433..21514)] [gbkey=CDS]	'13: RGTYRAAL'; '24: KHQDHVSL'; '65: KKEPLLYV'; '81: RHLPGPRV'; '124: KPIGMFFP'; '146: RKYGRGGY'; '188: KKLIGGDV'; '208: KPISAYAF'; '235: RADDEGFI'; '311: KQKLLYTF'; '377: KPNALLCA'; '420: KSFTLIFG'; '468: KVTQIANM'; '509: KIRQLLKG'; '570: KKVATIPY'; '584: KDTLAYYA'; '770: KQLGLLQP'; '827: KEEDGFAF'; '849: RLKGGAPV'; '922: KLLRGMPI'; '1103: RKKRNVDP'; '1151: KHGGGIAG'; '1170: KESDEYIL'; '1197: KN…	171
		lcl|NC_019843.3_prot_YP_009047203.1_2 [gene=orf1ab] [locus_tag=G128_gp01] [db_xref=GeneID:14254602] [protein=1A polyprotein] [protein_id=YP_009047203.1] [location=279..13454] [gbkey=CDS]	'13: RGTYRAAL'; '24: KHQDHVSL'; '65: KKEPLLYV'; '81: RHLPGPRV'; '124: KPIGMFFP'; '146: RKYGRGGY'; '188: KKLIGGDV'; '208: KPISAYAF'; '235: RADDEGFI'; '311: KQKLLYTF'; '377: KPNALLCA'; '420: KSFTLIFG'; '468: KVTQIANM'; '509: KIRQLLKG'; '570: KKVATIPY'; '584: KDTLAYYA'; '770: KQLGLLQP'; '827: KEEDGFAF'; '849: RLKGGAPV'; '922: KLLRGMPI'; '1103: RKKRNVDP'; '1151: KHGGGIAG'; '1170: KESDEYIL'; '1197: KN…	93
		lcl|NC_019843.3_prot_YP_009047204.1_3 [gene=S] [locus_tag=G128_gp02] [db_xref=GeneID:14254594] [protein=spike glycoprotein] [protein_id=YP_009047204.1] [location=21456..25517] [gbkey=CDS]	'52: KADGIIYP'; '62: RTYSNITI'; '110: KQFANGFV'; '141: RKIYPAFM'; '190: RSGNHCPA'; '269: RYVDLYGG'; '307: RKAWAAFY'; '334: RRAIDCGF'; '413: KLLSLFSV'; '543: KQLSPLEG'; '652: RACVSVPV'; '668: KTHATLFG'; '699: RRDSTYGP'; '748: RSVRSVPG'; '830: KINQALHG'; '921: RDLICAQY'; '1000: KFNQALGA'; '1102: KVNECVKA'; '1113: RSGFCGQG'; '1179: RIVDEWSY'; '1284: KELGNYTY'; '1294: KWPWYIWL';	22
		lcl|NC_019843.3_prot_YP_009047205.1_4 [gene=orf3] [locus_tag=G128_gp03] [db_xref=GeneID:14254595] [protein=NS3 protein] [protein_id=YP_009047205.1] [location=25532..25843] [gbkey=CDS]	'2: RVQRPPTL';	1
		lcl|NC_019843.3_prot_YP_009047206.1_5 [gene=orf4a] [locus_tag=G128_gp04] [db_xref=GeneID:14254596] [protein=NS4A protein] [protein_id=YP_009047206.1] [location=25852..26181] [gbkey=CDS]	'27: KPTAKYTP'; '80: KDGGIPDG';	2
		lcl|NC_019843.3_prot_YP_009047207.1_6 [gene=orf4b] [locus_tag=G128_gp05] [db_xref=GeneID:14254597] [protein=NS4B protein] [protein_id=YP_009047207.1] [location=26093..26833] [gbkey=CDS]	'109: RDFSPIAL'; '132: RKTLVLNA'; '149: RFKPVYRV'; '164: KDWLLVQG';	4
		lcl|NC_019843.3_prot_YP_009047208.1_7 [gene=orf5] [locus_tag=G128_gp06] [db_xref=GeneID:14254598] [protein=NS5 protein] [protein_id=YP_009047208.1] [location=26840..27514] [gbkey=CDS]	'9: KPVQLVPV'; '67: RTMVLYFL'; '112: RIRFCLML'; '209: RDSVPLHI';	4
		lcl|NC_019843.3_prot_YP_009047210.1_9 [gene=M] [locus_tag=G128_gp08] [db_xref=GeneID:14254600] [protein=membrane protein] [protein_id=YP_009047210.1] [location=27853..28512] [gbkey=CDS]	'41: RSMTVYVF'; '49: KMFVLWLL'; '104: RTGSWWSF'; '162: RLPNEVTV'; '171: KPNVLIAL';	5
		lcl|NC_019843.3_prot_YP_009047211.1_10 [gene=N] [locus_tag=G128_gp09] [db_xref=GeneID:14254601] [protein=nucleoprotein] [protein_id=YP_009047211.1] [location=28566..29807] [gbkey=CDS]	'52: KVPLTFPP'; '83: RKINTGNG'; '97: RWYFYYTG'; '114: RAVKDGIV'; '155: KLPKNFHI'; '258: KSFNMVQA'; '269: RGPGDLQG'; '292: RWPQIAEL'; '330: RYSGAIKL'; '395: RTRTRPSV';	10
		lcl|NC_019843.3_prot_YP_009047212.1_11 [gene=orf8b] [locus_tag=G128_gp10] [db_xref=GeneID:19910005] [protein=ORF8b protein] [protein_id=YP_009047212.1] [location=28762..29100] [gbkey=CDS]	'7: RKMLGIGG'; '16: RTEKLIPG'; '52: RMASFGSM'; '60: KMAPLMLL';	4
[RK]xxxx[FILV]x[FILV]	8
		lcl|NC_019843.3_prot_YP_009047202.1_1 [gene=orf1ab] [locus_tag=G128_gp01] [db_xref=GeneID:14254602] [protein=1AB polyprotein] [exception=ribosomal slippage] [protein_id=YP_009047202.1] [location=join(279..13433,13433..21514)] [gbkey=CDS]	'24: KHQDHVSL'; '65: KKEPLLYV'; '827: KEEDGFAF'; '1208: RAKQDVSL'; '1255: KTRVLVVV'; '1269: KSLTIVDI'; '1458: KNSTAFPF'; '1478: RTTQQLTI'; '1686: KACCYVGV'; '1764: RLKGGLIL'; '1895: KEDGDVLL'; '1919: KGKPILWV'; '2115: KMLFMLPL'; '2172: KSTLRLLL'; '2709: KCNLAFRL'; '3357: KPGAAFSV'; '3371: RPTGTFTV'; '3402: KEGSVINF'; '3438: KQVHQVQL'; '3852: KCTSVVLL'; '4285: KTGTGIAI'; '4342: RDPVGFCL'; '4808: K…	42
		lcl|NC_019843.3_prot_YP_009047203.1_2 [gene=orf1ab] [locus_tag=G128_gp01] [db_xref=GeneID:14254602] [protein=1A polyprotein] [protein_id=YP_009047203.1] [location=279..13454] [gbkey=CDS]	'24: KHQDHVSL'; '65: KKEPLLYV'; '827: KEEDGFAF'; '1208: RAKQDVSL'; '1255: KTRVLVVV'; '1269: KSLTIVDI'; '1458: KNSTAFPF'; '1478: RTTQQLTI'; '1686: KACCYVGV'; '1764: RLKGGLIL'; '1895: KEDGDVLL'; '1919: KGKPILWV'; '2115: KMLFMLPL'; '2172: KSTLRLLL'; '2709: KCNLAFRL'; '3357: KPGAAFSV'; '3371: RPTGTFTV'; '3402: KEGSVINF'; '3438: KQVHQVQL'; '3852: KCTSVVLL'; '4285: KTGTGIAI'; '4342: RDPVGFCL';	22
		lcl|NC_019843.3_prot_YP_009047204.1_3 [gene=S] [locus_tag=G128_gp02] [db_xref=GeneID:14254594] [protein=spike glycoprotein] [protein_id=YP_009047204.1] [location=21456..25517] [gbkey=CDS]	'62: RTYSNITI'; '142: KIYPAFML'; '308: KAWAAFYV'; '413: KLLSLFSV'; '652: RACVSVPV'; '1294: KWPWYIWL';	6
		lcl|NC_019843.3_prot_YP_009047205.1_4 [gene=orf3] [locus_tag=G128_gp03] [db_xref=GeneID:14254595] [protein=NS3 protein] [protein_id=YP_009047205.1] [location=25532..25843] [gbkey=CDS]	'5: RPPTLLLV';	1
		lcl|NC_019843.3_prot_YP_009047207.1_6 [gene=orf4b] [locus_tag=G128_gp05] [db_xref=GeneID:14254597] [protein=NS4B protein] [protein_id=YP_009047207.1] [location=26093..26833] [gbkey=CDS]	'109: RDFSPIAL';	1
		lcl|NC_019843.3_prot_YP_009047208.1_7 [gene=orf5] [locus_tag=G128_gp06] [db_xref=GeneID:14254598] [protein=NS5 protein] [protein_id=YP_009047208.1] [location=26840..27514] [gbkey=CDS]	'9: KPVQLVPV'; '112: RIRFCLML'; '209: RDSVPLHI';	3
		lcl|NC_019843.3_prot_YP_009047210.1_9 [gene=M] [locus_tag=G128_gp08] [db_xref=GeneID:14254600] [protein=membrane protein] [protein_id=YP_009047210.1] [location=27853..28512] [gbkey=CDS]	'162: RLPNEVTV'; '171: KPNVLIAL';	2
		lcl|NC_019843.3_prot_YP_009047211.1_10 [gene=N] [locus_tag=G128_gp09] [db_xref=GeneID:14254601] [protein=nucleoprotein] [protein_id=YP_009047211.1] [location=28566..29807] [gbkey=CDS]	'155: KLPKNFHI'; '330: RYSGAIKL';	2
WxxF	4
		lcl|NC_019843.3_prot_YP_009047202.1_1 [gene=orf1ab] [locus_tag=G128_gp01] [db_xref=GeneID:14254602] [protein=1AB polyprotein] [exception=ribosomal slippage] [protein_id=YP_009047202.1] [location=join(279..13433,13433..21514)] [gbkey=CDS]	'2287: WLWF'; '2988: WAIF'; '4540: WFDF'; '4594: WYDF'; '5994: WIGF'; '6256: WHYF'; '6425: WSTF'; '6965: WTVF';	8
		lcl|NC_019843.3_prot_YP_009047203.1_2 [gene=orf1ab] [locus_tag=G128_gp01] [db_xref=GeneID:14254602] [protein=1A polyprotein] [protein_id=YP_009047203.1] [location=279..13454] [gbkey=CDS]	'2287: WLWF'; '2988: WAIF';	2
		lcl|NC_019843.3_prot_YP_009047204.1_3 [gene=S] [locus_tag=G128_gp02] [db_xref=GeneID:14254594] [protein=spike glycoprotein] [protein_id=YP_009047204.1] [location=21456..25517] [gbkey=CDS]	'310: WAAF'; '1300: WLGF';	2
		lcl|NC_019843.3_prot_YP_009047210.1_9 [gene=M] [locus_tag=G128_gp08] [db_xref=GeneID:14254600] [protein=membrane protein] [protein_id=YP_009047210.1] [location=27853..28512] [gbkey=CDS]	'108: WWSF';	1
KRxxPxGPDPxH	0
KDEL	0
Yxx!	10
		lcl|NC_019843.3_prot_YP_009047202.1_1 [gene=orf1ab] [locus_tag=G128_gp01] [db_xref=GeneID:14254602] [protein=1AB polyprotein] [exception=ribosomal slippage] [protein_id=YP_009047202.1] [location=join(279..13433,13433..21514)] [gbkey=CDS]	'16: YRAA'; '56: YEVV'; '71: YVPI'; '148: YGRG'; '155: YTPF'; '201: YMCG'; '213: YAFL'; '249: YRLV'; '286: YFTL'; '316: YTFY'; '331: YHSA'; '431: YAYF'; '442: YFVP'; '529: YDVA'; '552: YAAI'; '559: YVVL'; '577: YKVC'; '596: YRVF'; '626: YFLV'; '745: YYCV'; '815: YVII'; '835: YPAC'; '1175: YILA'; '1220: YKAM'; '1226: YPLV'; '1268: YKSL'; '1284: YDGL'; '1333: YYCY'; '1383: YVCL'; '1419: YNSW'; '155…	178
		lcl|NC_019843.3_prot_YP_009047203.1_2 [gene=orf1ab] [locus_tag=G128_gp01] [db_xref=GeneID:14254602] [protein=1A polyprotein] [protein_id=YP_009047203.1] [location=279..13454] [gbkey=CDS]	'16: YRAA'; '56: YEVV'; '71: YVPI'; '148: YGRG'; '155: YTPF'; '201: YMCG'; '213: YAFL'; '249: YRLV'; '286: YFTL'; '316: YTFY'; '331: YHSA'; '431: YAYF'; '442: YFVP'; '529: YDVA'; '552: YAAI'; '559: YVVL'; '577: YKVC'; '596: YRVF'; '626: YFLV'; '745: YYCV'; '815: YVII'; '835: YPAC'; '1175: YILA'; '1220: YKAM'; '1226: YPLV'; '1268: YKSL'; '1284: YDGL'; '1333: YYCY'; '1383: YVCL'; '1419: YNSW'; '155…	100
		lcl|NC_019843.3_prot_YP_009047204.1_3 [gene=S] [locus_tag=G128_gp02] [db_xref=GeneID:14254594] [protein=spike glycoprotein] [protein_id=YP_009047204.1] [location=21456..25517] [gbkey=CDS]	'18: YVDV'; '58: YPQG'; '64: YSNI'; '71: YQGL'; '87: YSAG'; '144: YPAF'; '184: YCIL'; '201: YTSF'; '207: YHTP'; '231: YFNL'; '270: YVDL'; '287: YDTI'; '292: YYSI'; '351: YESF'; '438: YSSL'; '445: YFSY'; '497: YSYI'; '523: YSPC'; '606: YSLY'; '632: YDAY'; '648: YYCL'; '704: YGPL'; '777: YFKL'; '824: YGQF'; '905: YMQG'; '909: YDDC'; '928: YVAG'; '932: YKVL'; '1153: YGLC'; '1204: YVAP'; '1211: YQNI'…	36
		lcl|NC_019843.3_prot_YP_009047205.1_4 [gene=orf3] [locus_tag=G128_gp03] [db_xref=GeneID:14254595] [protein=NS3 protein] [protein_id=YP_009047205.1] [location=25532..25843] [gbkey=CDS]	'35: YSGC'; '55: YTNF';	2
		lcl|NC_019843.3_prot_YP_009047206.1_5 [gene=orf4a] [locus_tag=G128_gp04] [db_xref=GeneID:14254596] [protein=NS4A protein] [protein_id=YP_009047206.1] [location=25852..26181] [gbkey=CDS]	'3: YVSL'; '19: YTTC'; '32: YTPL';	3
		lcl|NC_019843.3_prot_YP_009047207.1_6 [gene=orf4b] [locus_tag=G128_gp05] [db_xref=GeneID:14254597] [protein=NS4B protein] [protein_id=YP_009047207.1] [location=26093..26833] [gbkey=CDS]	'56: YVRV'; '175: YHSG'; '238: YPIL';	3
		lcl|NC_019843.3_prot_YP_009047208.1_7 [gene=orf5] [locus_tag=G128_gp06] [db_xref=GeneID:14254598] [protein=NS5 protein] [protein_id=YP_009047208.1] [location=26840..27514] [gbkey=CDS]	'33: YIPA'; '39: YVAA'; '72: YFLV'; '77: YNFL'; '91: YPTG'; '122: YIPL'; '174: YIEC';	7
		lcl|NC_019843.3_prot_YP_009047209.1_8 [gene=E] [locus_tag=G128_gp07] [db_xref=GeneID:14254599] [protein=envelope protein] [protein_id=YP_009047209.1] [location=27590..27838] [gbkey=CDS]	'59: YNTG'; '66: YVKF';	2
		lcl|NC_019843.3_prot_YP_009047210.1_9 [gene=M] [locus_tag=G128_gp08] [db_xref=GeneID:14254600] [protein=membrane protein] [protein_id=YP_009047210.1] [location=27853..28512] [gbkey=CDS]	'36: YGYP'; '160: YDRL'; '195: YHRY'; '203: YRSP';	4
		lcl|NC_019843.3_prot_YP_009047211.1_10 [gene=N] [locus_tag=G128_gp09] [db_xref=GeneID:14254601] [protein=nucleoprotein] [protein_id=YP_009047211.1] [location=28566..29807] [gbkey=CDS]	'44: YTGL'; '99: YFYY'; '215: YLDL'; '331: YSGA'; '344: YNKW'; '358: YKTF';	6
Yxx[FILV]	10
		lcl|NC_019843.3_prot_YP_009047202.1_1 [gene=orf1ab] [locus_tag=G128_gp01] [db_xref=GeneID:14254602] [protein=1AB polyprotein] [exception=ribosomal slippage] [protein_id=YP_009047202.1] [location=join(279..13433,13433..21514)] [gbkey=CDS]	'56: YEVV'; '71: YVPI'; '155: YTPF'; '213: YAFL'; '249: YRLV'; '286: YFTL'; '431: YAYF'; '552: YAAI'; '559: YVVL'; '596: YRVF'; '626: YFLV'; '745: YYCV'; '815: YVII'; '1226: YPLV'; '1268: YKSL'; '1284: YDGL'; '1383: YVCL'; '1553: YGPV'; '1690: YVGV'; '1890: YSFL'; '1908: YDPI'; '2028: YQVI'; '2217: YKEV'; '2223: YLGI'; '2268: YPAL'; '2353: YNLL'; '2366: YQHV'; '2482: YERF'; '2511: YNFI'; '2534: Y…	98
		lcl|NC_019843.3_prot_YP_009047203.1_2 [gene=orf1ab] [locus_tag=G128_gp01] [db_xref=GeneID:14254602] [protein=1A polyprotein] [protein_id=YP_009047203.1] [location=279..13454] [gbkey=CDS]	'56: YEVV'; '71: YVPI'; '155: YTPF'; '213: YAFL'; '249: YRLV'; '286: YFTL'; '431: YAYF'; '552: YAAI'; '559: YVVL'; '596: YRVF'; '626: YFLV'; '745: YYCV'; '815: YVII'; '1226: YPLV'; '1268: YKSL'; '1284: YDGL'; '1383: YVCL'; '1553: YGPV'; '1690: YVGV'; '1890: YSFL'; '1908: YDPI'; '2028: YQVI'; '2217: YKEV'; '2223: YLGI'; '2268: YPAL'; '2353: YNLL'; '2366: YQHV'; '2482: YERF'; '2511: YNFI'; '2534: Y…	57
		lcl|NC_019843.3_prot_YP_009047204.1_3 [gene=S] [locus_tag=G128_gp02] [db_xref=GeneID:14254594] [protein=spike glycoprotein] [protein_id=YP_009047204.1] [location=21456..25517] [gbkey=CDS]	'18: YVDV'; '64: YSNI'; '71: YQGL'; '144: YPAF'; '184: YCIL'; '201: YTSF'; '231: YFNL'; '270: YVDL'; '287: YDTI'; '292: YYSI'; '351: YESF'; '438: YSSL'; '497: YSYI'; '635: YQNL'; '648: YYCL'; '704: YGPL'; '777: YFKL'; '824: YGQF'; '932: YKVL'; '1211: YQNI'; '1264: YEML'; '1280: YIDL'; '1298: YIWL';	23
		lcl|NC_019843.3_prot_YP_009047205.1_4 [gene=orf3] [locus_tag=G128_gp03] [db_xref=GeneID:14254595] [protein=NS3 protein] [protein_id=YP_009047205.1] [location=25532..25843] [gbkey=CDS]	'55: YTNF';	1
		lcl|NC_019843.3_prot_YP_009047206.1_5 [gene=orf4a] [locus_tag=G128_gp04] [db_xref=GeneID:14254596] [protein=NS4A protein] [protein_id=YP_009047206.1] [location=25852..26181] [gbkey=CDS]	'3: YVSL'; '32: YTPL';	2
		lcl|NC_019843.3_prot_YP_009047207.1_6 [gene=orf4b] [locus_tag=G128_gp05] [db_xref=GeneID:14254597] [protein=NS4B protein] [protein_id=YP_009047207.1] [location=26093..26833] [gbkey=CDS]	'56: YVRV'; '238: YPIL';	2
		lcl|NC_019843.3_prot_YP_009047208.1_7 [gene=orf5] [locus_tag=G128_gp06] [db_xref=GeneID:14254598] [protein=NS5 protein] [protein_id=YP_009047208.1] [location=26840..27514] [gbkey=CDS]	'72: YFLV'; '77: YNFL'; '122: YIPL';	3
		lcl|NC_019843.3_prot_YP_009047209.1_8 [gene=E] [locus_tag=G128_gp07] [db_xref=GeneID:14254599] [protein=envelope protein] [protein_id=YP_009047209.1] [location=27590..27838] [gbkey=CDS]	'66: YVKF';	1
		lcl|NC_019843.3_prot_YP_009047210.1_9 [gene=M] [locus_tag=G128_gp08] [db_xref=GeneID:14254600] [protein=membrane protein] [protein_id=YP_009047210.1] [location=27853..28512] [gbkey=CDS]	'160: YDRL';	1
		lcl|NC_019843.3_prot_YP_009047211.1_10 [gene=N] [locus_tag=G128_gp09] [db_xref=GeneID:14254601] [protein=nucleoprotein] [protein_id=YP_009047211.1] [location=28566..29807] [gbkey=CDS]	'44: YTGL'; '215: YLDL'; '358: YKTF';	3
[LIVFM]x(2,3)[LIVFM]x[LIVFM]	11
		lcl|NC_019843.3_prot_YP_009047202.1_1 [gene=orf1ab] [locus_tag=G128_gp01] [db_xref=GeneID:14254602] [protein=1AB polyprotein] [exception=ribosomal slippage] [protein_id=YP_009047202.1] [location=join(279..13433,13433..21514)] [gbkey=CDS]	'29: VSLTVPL'; '58: VVKAMLL'; '69: LLYVPI'; '130: FPYDIEL'; '305: VSDLSL'; '472: IANMFL'; '486: FVGEFVV'; '513: LLKGVTL'; '539: MDNAINV'; '610: FSELLF'; '666: FNFLLDL'; '675: LFRIFL'; '702: VKQVLDL'; '709: LNKGMQL'; '755: VQQDLDV'; '812: VGDYVII'; '844: VPTLFRL'; '856: VKKVAF'; '872: VRSVTV'; '894: LRTFVV'; '916: VSDLLV'; '923: LLRGMPI'; '1009: VDEAFPL'; '1039: IAQVVI'; '1054: VPDTVEV'; '1119: IT…	203
		lcl|NC_019843.3_prot_YP_009047203.1_2 [gene=orf1ab] [locus_tag=G128_gp01] [db_xref=GeneID:14254602] [protein=1A polyprotein] [protein_id=YP_009047203.1] [location=279..13454] [gbkey=CDS]	'29: VSLTVPL'; '58: VVKAMLL'; '69: LLYVPI'; '130: FPYDIEL'; '305: VSDLSL'; '472: IANMFL'; '486: FVGEFVV'; '513: LLKGVTL'; '539: MDNAINV'; '610: FSELLF'; '666: FNFLLDL'; '675: LFRIFL'; '702: VKQVLDL'; '709: LNKGMQL'; '755: VQQDLDV'; '812: VGDYVII'; '844: VPTLFRL'; '856: VKKVAF'; '872: VRSVTV'; '894: LRTFVV'; '916: VSDLLV'; '923: LLRGMPI'; '1009: VDEAFPL'; '1039: IAQVVI'; '1054: VPDTVEV'; '1119: IT…	132
		lcl|NC_019843.3_prot_YP_009047204.1_3 [gene=S] [locus_tag=G128_gp02] [db_xref=GeneID:14254594] [protein=spike glycoprotein] [protein_id=YP_009047204.1] [location=21456..25517] [gbkey=CDS]	'1: MIHSVFL'; '112: FANGFVV'; '143: IYPAFML'; '165: FNHTLVL'; '228: FKEYFNL'; '250: ILEWFGI'; '281: FATLPV'; '318: LQPLTF'; '324: LLDFSV'; '399: FKRLVF'; '411: LTKLLSL'; '446: FSYPLSM'; '563: MTEQLQM'; '584: VCPKLEF'; '651: LRACVSV'; '711: VGCVLGL'; '718: VNSSLFV'; '753: VPGEMRL'; '764: FNHPIQV'; '782: IPTNFSF'; '799: IQKVTV'; '865: FGGDFNL'; '873: LLEPVSI'; '890: IEDLLF'; '935: LPPLMDV'; '967: F…	32
		lcl|NC_019843.3_prot_YP_009047205.1_4 [gene=orf3] [locus_tag=G128_gp03] [db_xref=GeneID:14254595] [protein=NS3 protein] [protein_id=YP_009047205.1] [location=25532..25843] [gbkey=CDS]	'9: LLLVFSL'; '54: LYTNFRI'; '90: VTSVNL';	3
		lcl|NC_019843.3_prot_YP_009047206.1_5 [gene=orf4a] [locus_tag=G128_gp04] [db_xref=GeneID:14254596] [protein=NS4A protein] [protein_id=YP_009047206.1] [location=25852..26181] [gbkey=CDS]	'1: MDYVSL';	1
		lcl|NC_019843.3_prot_YP_009047207.1_6 [gene=orf4b] [locus_tag=G128_gp05] [db_xref=GeneID:14254597] [protein=NS4B protein] [protein_id=YP_009047207.1] [location=26093..26833] [gbkey=CDS]	'35: VKRRFSL'; '97: LALLNL'; '111: FSPIAL'; '117: FLRNVRF'; '125: LHEFAL'; '131: LRKTLVL'; '163: IKDWLLV'; '179: LPLHMSI'; '213: FVTPLAV';	9
		lcl|NC_019843.3_prot_YP_009047208.1_7 [gene=orf5] [locus_tag=G128_gp06] [db_xref=GeneID:14254598] [protein=NS5 protein] [protein_id=YP_009047208.1] [location=26840..27514] [gbkey=CDS]	'7: LFKPVQL'; '40: VAALAV'; '47: VCLIPL'; '65: IIRTMVL'; '75: VLYNFLL'; '97: LIAFLVI'; '104: LIILWF'; '110: VDRIRF'; '119: LNSYIPL'; '183: FSKISL'; '191: VTDFSL'; '200: VSTVFV';	12
		lcl|NC_019843.3_prot_YP_009047209.1_8 [gene=E] [locus_tag=G128_gp07] [db_xref=GeneID:14254599] [protein=envelope protein] [protein_id=YP_009047209.1] [location=27590..27838] [gbkey=CDS]	'5: VQERIGL'; '12: FIVNFFI'; '21: VVCAITL'; '28: LVCMAF'; '47: FNTLLV';	5
		lcl|NC_019843.3_prot_YP_009047210.1_9 [gene=M] [locus_tag=G128_gp08] [db_xref=GeneID:14254600] [protein=membrane protein] [protein_id=YP_009047210.1] [location=27853..28512] [gbkey=CDS]	'21: FAWSLIF'; '28: LLITIVL'; '45: VYVFKM'; '69: VYPIDL'; '86: VSAMMWI'; '95: FVQSIRL'; '118: LLNVPF'; '150: MAGMHF'; '163: LPNEVTV'; '174: VLIALKM'; '208: ITADIEL';	11
		lcl|NC_019843.3_prot_YP_009047211.1_10 [gene=N] [locus_tag=G128_gp09] [db_xref=GeneID:14254601] [protein=nucleoprotein] [protein_id=YP_009047211.1] [location=28566..29807] [gbkey=CDS]	'156: LPKNFHI'; '213: LLYLDL'; '262: MVQAFGL'; '278: FGDLQL'; '309: MSQFKL';	5
		lcl|NC_019843.3_prot_YP_009047212.1_11 [gene=orf8b] [locus_tag=G128_gp10] [db_xref=GeneID:19910005] [protein=ORF8b protein] [protein_id=YP_009047212.1] [location=28762..29100] [gbkey=CDS]	'1: MPILPL'; '20: LIPGMEL'; '56: FGSMKM'; '64: LMLLQL'; '75: LTMIQL';	5
KRx(10,12)K[KR][KR]	1
		lcl|NC_019843.3_prot_YP_009047207.1_6 [gene=orf4b] [locus_tag=G128_gp05] [db_xref=GeneID:14254597] [protein=NS4B protein] [protein_id=YP_009047207.1] [location=26093..26833] [gbkey=CDS]	'23: KRSHSPTKKLRYVKRR';	1
KRx(10,12)K[KR]X[KR]	0
K[KR]RK	0
KR[KR]R	0
[PR]xxKR{DE}[KR]	0
KRx[WFY]xxAF	0
[RP]xxKR[KR]{DE}	1
		lcl|NC_019843.3_prot_YP_009047207.1_6 [gene=orf4b] [locus_tag=G128_gp05] [db_xref=GeneID:14254597] [protein=NS4B protein] [protein_id=YP_009047207.1] [location=26093..26833] [gbkey=CDS]	'33: RYVKRRF';	1
LGKR[KR][WFY]	0
KRxR	2
		lcl|NC_019843.3_prot_YP_009047202.1_1 [gene=orf1ab] [locus_tag=G128_gp01] [db_xref=GeneID:14254602] [protein=1AB polyprotein] [exception=ribosomal slippage] [protein_id=YP_009047202.1] [location=join(279..13433,13433..21514)] [gbkey=CDS]	'1100: KRLR'; '2383: KRNR';	2
		lcl|NC_019843.3_prot_YP_009047203.1_2 [gene=orf1ab] [locus_tag=G128_gp01] [db_xref=GeneID:14254602] [protein=1A polyprotein] [protein_id=YP_009047203.1] [location=279..13454] [gbkey=CDS]	'1100: KRLR'; '2383: KRNR';	2
RKRP	0
[ST]x[VIL]	11
		lcl|NC_019843.3_prot_YP_009047202.1_1 [gene=orf1ab] [locus_tag=G128_gp01] [db_xref=GeneID:14254602] [protein=1AB polyprotein] [exception=ribosomal slippage] [protein_id=YP_009047202.1] [location=join(279..13433,13433..21514)] [gbkey=CDS]	'2: SFV'; '115: SLV'; '119: TTL'; '196: TPV'; '223: TKL'; '272: SVV'; '303: SGV'; '306: SDL'; '328: TYI'; '345: SWL'; '407: SYL'; '423: TLI'; '449: SVV'; '452: SRI'; '470: TQI'; '505: TNV'; '548: TGL'; '563: TGL'; '593: SVL'; '605: SGV'; '611: SEL'; '641: STI'; '649: TAV'; '652: SKL'; '699: STL'; '718: TKV'; '725: SKI'; '737: SLI'; '782: TTV'; '795: TVV'; '887: TLL'; '892: SSL'; '896: TFV'; '917:…	232
		lcl|NC_019843.3_prot_YP_009047203.1_2 [gene=orf1ab] [locus_tag=G128_gp01] [db_xref=GeneID:14254602] [protein=1A polyprotein] [protein_id=YP_009047203.1] [location=279..13454] [gbkey=CDS]	'2: SFV'; '115: SLV'; '119: TTL'; '196: TPV'; '223: TKL'; '272: SVV'; '303: SGV'; '306: SDL'; '328: TYI'; '345: SWL'; '407: SYL'; '423: TLI'; '449: SVV'; '452: SRI'; '470: TQI'; '505: TNV'; '548: TGL'; '563: TGL'; '593: SVL'; '605: SGV'; '611: SEL'; '641: STI'; '649: TAV'; '652: SKL'; '699: STL'; '718: TKV'; '725: SKI'; '737: SLI'; '782: TTV'; '795: TVV'; '887: TLL'; '892: SSL'; '896: TFV'; '917:…	161
		lcl|NC_019843.3_prot_YP_009047204.1_3 [gene=S] [locus_tag=G128_gp02] [db_xref=GeneID:14254594] [protein=spike glycoprotein] [protein_id=YP_009047204.1] [location=21456..25517] [gbkey=CDS]	'17: SYV'; '65: SNI'; '129: TVI'; '151: SSV'; '168: TLV'; '178: TLL'; '294: SII'; '322: TFL'; '345: SQL'; '358: SGV'; '373: SVV'; '386: SPL'; '412: TKL'; '426: SQI'; '439: SSL'; '454: SDL'; '477: TCL'; '489: TTI'; '498: SYI'; '504: SRL'; '512: TEV'; '528: SIV'; '532: STV'; '546: SPL'; '559: STV'; '594: TKI'; '598: SQL'; '621: TAV'; '660: SVI'; '695: SML'; '709: TPV'; '720: SSL'; '743: STL'; '797:…	52
		lcl|NC_019843.3_prot_YP_009047205.1_4 [gene=orf3] [locus_tag=G128_gp03] [db_xref=GeneID:14254595] [protein=NS3 protein] [protein_id=YP_009047205.1] [location=25532..25843] [gbkey=CDS]	'8: TLL'; '16: SLL'; '91: TSV';	3
		lcl|NC_019843.3_prot_YP_009047206.1_5 [gene=orf4a] [locus_tag=G128_gp04] [db_xref=GeneID:14254596] [protein=NS4A protein] [protein_id=YP_009047206.1] [location=25852..26181] [gbkey=CDS]	'5: SLL'; '21: TCL'; '33: TPL'; '38: TSL'; '57: SAV'; '95: SSL';	6
		lcl|NC_019843.3_prot_YP_009047207.1_6 [gene=orf4b] [locus_tag=G128_gp05] [db_xref=GeneID:14254597] [protein=NS4B protein] [protein_id=YP_009047207.1] [location=26093..26833] [gbkey=CDS]	'14: TQV'; '40: SLL'; '48: SVI'; '112: SPI'; '134: TLV'; '140: SEI'; '158: TAI'; '177: SGL'; '186: SKL'; '215: TPL';	10
		lcl|NC_019843.3_prot_YP_009047208.1_7 [gene=orf5] [locus_tag=G128_gp06] [db_xref=GeneID:14254598] [protein=NS5 protein] [protein_id=YP_009047208.1] [location=26840..27514] [gbkey=CDS]	'28: SIV'; '32: TYI'; '64: SII'; '68: TMV'; '95: SCL'; '121: SYI'; '136: STV'; '173: TYI'; '178: TYI'; '184: SKI'; '187: SLV'; '201: STV'; '220: SSL';	13
		lcl|NC_019843.3_prot_YP_009047209.1_8 [gene=E] [locus_tag=G128_gp07] [db_xref=GeneID:14254599] [protein=envelope protein] [protein_id=YP_009047209.1] [location=27590..27838] [gbkey=CDS]	'20: TVV'; '26: TLL'; '37: TRL'; '49: TLL';	4
		lcl|NC_019843.3_prot_YP_009047210.1_9 [gene=M] [locus_tag=G128_gp08] [db_xref=GeneID:14254600] [protein=membrane protein] [protein_id=YP_009047210.1] [location=27853..28512] [gbkey=CDS]	'5: TQL'; '24: SLI'; '31: TIV'; '67: SAV'; '76: SQI'; '80: SGI'; '126: TTV'; '137: TSV'; '140: TAV'; '190: SGV';	10
		lcl|NC_019843.3_prot_YP_009047211.1_10 [gene=N] [locus_tag=G128_gp09] [db_xref=GeneID:14254601] [protein=nucleoprotein] [protein_id=YP_009047211.1] [location=28566..29807] [gbkey=CDS]	'21: TNL'; '45: TGL'; '144: SAI'; '154: TKL'; '176: SSL'; '204: SGI';	6
		lcl|NC_019843.3_prot_YP_009047212.1_11 [gene=orf8b] [locus_tag=G128_gp10] [db_xref=GeneID:19910005] [protein=ORF8b protein] [protein_id=YP_009047212.1] [location=28762..29100] [gbkey=CDS]	'36: TTL'; '48: SGL'; '76: TMI'; '90: SFL'; '95: STL';	5
x(3)!x(3)!x(3)!x(5)	11
		lcl|NC_019843.3_prot_YP_009047202.1_1 [gene=orf1ab] [locus_tag=G128_gp01] [db_xref=GeneID:14254602] [protein=1AB polyprotein] [exception=ribosomal slippage] [protein_id=YP_009047202.1] [location=join(279..13433,13433..21514)] [gbkey=CDS]	'9: AQGARGTYRAALNSEKH'; '26: QDHVSLTVPLCGSGNLV'; '45: LSPWFMDGENAYEVVKA'; '65: KKEPLLYVPIRLAGHTR'; '83: LPGPRVYLVERLIACEN'; '105: QLAYSSSANGSLVGTTL'; '123: GKPIGMFFPYDIELVTG'; '141: QNILLRKYGRGGYHYTP'; '167: CPEWMDDFEADPKGKYA'; '184: QNLLKKLIGGDVTPVDQ'; '202: MCGVDGKPISAYAFLMA'; '219: KDGITKLADVEADVAAR'; '237: DDEGFITLKNNLYRLVW'; '267: IFTINSVVQKDGVENTP'; '287: FTLGCKILTLTPRNKWS'; '307: DLSLKQKLL…	308
		lcl|NC_019843.3_prot_YP_009047203.1_2 [gene=orf1ab] [locus_tag=G128_gp01] [db_xref=GeneID:14254602] [protein=1A polyprotein] [protein_id=YP_009047203.1] [location=279..13454] [gbkey=CDS]	'9: AQGARGTYRAALNSEKH'; '26: QDHVSLTVPLCGSGNLV'; '45: LSPWFMDGENAYEVVKA'; '65: KKEPLLYVPIRLAGHTR'; '83: LPGPRVYLVERLIACEN'; '105: QLAYSSSANGSLVGTTL'; '123: GKPIGMFFPYDIELVTG'; '141: QNILLRKYGRGGYHYTP'; '167: CPEWMDDFEADPKGKYA'; '184: QNLLKKLIGGDVTPVDQ'; '202: MCGVDGKPISAYAFLMA'; '219: KDGITKLADVEADVAAR'; '237: DDEGFITLKNNLYRLVW'; '267: IFTINSVVQKDGVENTP'; '287: FTLGCKILTLTPRNKWS'; '307: DLSLKQKLL…	194
		lcl|NC_019843.3_prot_YP_009047204.1_3 [gene=S] [locus_tag=G128_gp02] [db_xref=GeneID:14254594] [protein=spike glycoprotein] [protein_id=YP_009047204.1] [location=21456..25517] [gbkey=CDS]	'3: HSVFLLMFLLTPTESYV'; '28: SACIEVDIQQTFFDKTW'; '50: VSKADGIIYPQGRTYSN'; '68: TITYQGLFPYQGDHGDM'; '94: GTTPQKLFVANYSQDVK'; '113: ANGFVVRIGAAANSTGT'; '137: SATIRKIYPAFMLGSSV'; '158: DGKMGRFFNHTLVLLPD'; '176: CGTLLRAFYCILEPRSG'; '194: HCPAGNSYTSFATYHTP'; '234: LRNCTFMYTYNITEDEI'; '259: TAQGVHLFSSRYVDLYG'; '279: FQFATLPVYDTIKYYSI'; '307: RKAWAAFYVYKLQPLTF'; '326: DFSVDGYIRRAIDCGFN'; '363: VSSFEAKPS…	58
		lcl|NC_019843.3_prot_YP_009047205.1_4 [gene=orf3] [locus_tag=G128_gp03] [db_xref=GeneID:14254595] [protein=NS3 protein] [protein_id=YP_009047205.1] [location=25532..25843] [gbkey=CDS]	'4: QRPPTLLLVFSLSLLVT'; '32: CQNYSGCMLRACIKTAQ'; '51: TAGLYTNFRIDVPSAES';	3
		lcl|NC_019843.3_prot_YP_009047206.1_5 [gene=orf4a] [locus_tag=G128_gp04] [db_xref=GeneID:14254596] [protein=NS4A protein] [protein_id=YP_009047206.1] [location=25852..26181] [gbkey=CDS]	'3: YVSLLNQIWQKYLNSPY'; '21: TCLYIPKPTAKYTPLVG'; '40: LHPVLWNCQLSFAGYTE'; '63: KALAKQDAAQRIAWLLH'; '80: KDGGIPDGCSLYLRHSS';	5
		lcl|NC_019843.3_prot_YP_009047207.1_6 [gene=orf4b] [locus_tag=G128_gp05] [db_xref=GeneID:14254597] [protein=NS4B protein] [protein_id=YP_009047207.1] [location=26093..26833] [gbkey=CDS]	'2: EESLMDVPSTSGTQVYS'; '46: DLSVIVQPTHYVRVTFS'; '75: LHSVHNWLKPYGGQPVS'; '104: DEDLARDFSPIALFLRN'; '128: FALLRKTLVLNASEIYC'; '149: RFKPVYRVNTAIPTIKD'; '168: LVQGFSLYHSGLPLHMS'; '187: KLHALDDVTRNYIITMP'; '205: FRTYPQQMFVTPLAVDV'; '227: SNQGNKQIVHSYPILHH';	10
		lcl|NC_019843.3_prot_YP_009047208.1_7 [gene=orf5] [locus_tag=G128_gp06] [db_xref=GeneID:14254598] [protein=NS5 protein] [protein_id=YP_009047208.1] [location=26840..27514] [gbkey=CDS]	'4: SASLFKPVQLVPVSPAF'; '27: DSIVFTYIPASGYVAAL'; '44: AVNVCLIPLLLLLRQDT'; '62: RRSIIRTMVLYFLVLYN'; '81: LAIVLVNGVHYPTGSCL'; '98: IAFLVILIILWFVDRIR'; '115: FCLMLNSYIPLFDMRSH'; '135: VSTVSSHGMVPVIHTKP'; '172: STYIECTYISRFSKISL'; '193: DFSLNGNVSTVFVPATR';	10
		lcl|NC_019843.3_prot_YP_009047209.1_8 [gene=E] [locus_tag=G128_gp07] [db_xref=GeneID:14254599] [protein=envelope protein] [protein_id=YP_009047209.1] [location=27590..27838] [gbkey=CDS]	'2: LPFVQERIGLFIVNFFI'; '20: TVVCAITLLVCMAFLTA'; '40: CVQCMTGFNTLLVQPAL';	3
		lcl|NC_019843.3_prot_YP_009047210.1_9 [gene=M] [locus_tag=G128_gp08] [db_xref=GeneID:14254600] [protein=membrane protein] [protein_id=YP_009047210.1] [location=27853..28512] [gbkey=CDS]	'12: IIAIIKDWNFAWSLIFL'; '36: YGYPSRSMTVYVFKMFV'; '54: WLLWPSSMALSIFSAVY'; '71: PIDLASQIISGIVAAVS'; '88: AMMWISYFVQSIRLFMR'; '106: GSWWSFNPETNCLLNVP'; '139: VTAVVTNGHLKMAGMHF'; '167: VTVAKPNVLIALKMVKR'; '184: QSYGTNSGVAIYHRYKA'; '203: YRSPPITADIELALLRA';	10
		lcl|NC_019843.3_prot_YP_009047211.1_10 [gene=N] [locus_tag=G128_gp09] [db_xref=GeneID:14254601] [protein=nucleoprotein] [protein_id=YP_009047211.1] [location=28566..29807] [gbkey=CDS]	'2: ASPAAPRAVSFADNNDI'; '30: NPKPRAAPNNTVSWYTG'; '48: TQHGKVPLTFPPGQGVP'; '87: TGNGIKQLAPRWYFYYT'; '104: GTGPEAALPFRAVKDGI'; '124: HEDGATDAPSTFGTRNP'; '149: QFAPGTKLPKNFHIEGT'; '195: STRGTSPGPSGIGAVGG'; '259: SFNMVQAFGLRGPGDLQ'; '276: GNFGDLQLNKLGTEDPR'; '294: PQIAELAPTASAFMGMS'; '320: DDHGNPVYFLRYSGAIK'; '344: YNKWLELLEQNIDAYKT'; '397: RTRPSVQPGPMIDVNTD';	14
		lcl|NC_019843.3_prot_YP_009047212.1_11 [gene=orf8b] [locus_tag=G128_gp10] [db_xref=GeneID:19910005] [protein=ORF8b protein] [protein_id=YP_009047212.1] [location=28762..29100] [gbkey=CDS]	'2: PILPLRKMLGIGGDRTE'; '19: KLIPGMELSNWLPGGTS'; '46: SHSGLLRMASFGSMKMA'; '64: LMLLQLLGRGTLTMIQL'; '96: TLRGLEAIVNHLQEPLA';	5
x(3)[FILV]x(3)[FILV]x(3)[FILV]x(5)	10
		lcl|NC_019843.3_prot_YP_009047202.1_1 [gene=orf1ab] [locus_tag=G128_gp01] [db_xref=GeneID:14254602] [protein=1AB polyprotein] [exception=ribosomal slippage] [protein_id=YP_009047202.1] [location=join(279..13433,13433..21514)] [gbkey=CDS]	'38: SGNLVEKLSPWFMDGEN'; '123: GKPIGMFFPYDIELVTG'; '184: QNLLKKLIGGDVTPVDQ'; '241: FITLKNNLYRLVWHVER'; '307: DLSLKQKLLYTFYGKES'; '447: AKSVVSRIGDSIFTGCT'; '484: LNFVGEFVVNDVVLAIL'; '558: PYVVLTGLGESFKKVAT'; '576: PYKVCNSVKDTLAYYAH'; '607: VSSFSELLFDCVDLSVA'; '648: QTAVSKLLDTCFEATEA'; '665: TFNFLLDLAGLFRIFLR'; '691: FVVVNGKVSTLVKQVLD'; '752: AKSVQQDLDVILPGEFS'; '874: SVTVEYNIHAVLDTLLA'; '905: IEEF…	101
		lcl|NC_019843.3_prot_YP_009047203.1_2 [gene=orf1ab] [locus_tag=G128_gp01] [db_xref=GeneID:14254602] [protein=1A polyprotein] [protein_id=YP_009047203.1] [location=279..13454] [gbkey=CDS]	'38: SGNLVEKLSPWFMDGEN'; '123: GKPIGMFFPYDIELVTG'; '184: QNLLKKLIGGDVTPVDQ'; '241: FITLKNNLYRLVWHVER'; '307: DLSLKQKLLYTFYGKES'; '447: AKSVVSRIGDSIFTGCT'; '484: LNFVGEFVVNDVVLAIL'; '558: PYVVLTGLGESFKKVAT'; '576: PYKVCNSVKDTLAYYAH'; '607: VSSFSELLFDCVDLSVA'; '648: QTAVSKLLDTCFEATEA'; '665: TFNFLLDLAGLFRIFLR'; '691: FVVVNGKVSTLVKQVLD'; '752: AKSVQQDLDVILPGEFS'; '874: SVTVEYNIHAVLDTLLA'; '905: IEEF…	68
		lcl|NC_019843.3_prot_YP_009047204.1_3 [gene=S] [locus_tag=G128_gp02] [db_xref=GeneID:14254594] [protein=spike glycoprotein] [protein_id=YP_009047204.1] [location=21456..25517] [gbkey=CDS]	'28: SACIEVDIQQTFFDKTW'; '109: VKQFANGFVVRIGAAAN'; '176: CGTLLRAFYCILEPRSG'; '318: LQPLTFLLDFSVDGYIR'; '378: AEGVECDFSPLLSGTPP'; '439: SSLILDYFSYPLSMKSD'; '477: TCLILATVPHNLTTITK'; '564: TEQLQMGFGITVQYGTD'; '593: DTKIASQLGNCVEYSLY'; '648: YYCLRACVSVPVSVIYD'; '704: YGPLQTPVGCVLGLVNS'; '775: SSYFKLSIPTNFSFGVT'; '824: YGQFCSKINQALHGANL'; '858: SSPIIPGFGGDFNLTLL'; '887: RSAIEDLLFDKVTIADP'; '969: AIPF…	22
		lcl|NC_019843.3_prot_YP_009047205.1_4 [gene=orf3] [locus_tag=G128_gp03] [db_xref=GeneID:14254595] [protein=NS3 protein] [protein_id=YP_009047205.1] [location=25532..25843] [gbkey=CDS]	'6: PPTLLLVFSLSLLVTAS'; '51: TAGLYTNFRIDVPSAES';	2
		lcl|NC_019843.3_prot_YP_009047206.1_5 [gene=orf4a] [locus_tag=G128_gp04] [db_xref=GeneID:14254596] [protein=NS4A protein] [protein_id=YP_009047206.1] [location=25852..26181] [gbkey=CDS]	'33: TPLVGTSLHPVLWNCQL';	1
		lcl|NC_019843.3_prot_YP_009047207.1_6 [gene=orf4b] [locus_tag=G128_gp05] [db_xref=GeneID:14254597] [protein=NS4B protein] [protein_id=YP_009047207.1] [location=26093..26833] [gbkey=CDS]	'114: IALFLRNVRFELHEFAL'; '210: QQMFVTPLAVDVVSIRS';	2
		lcl|NC_019843.3_prot_YP_009047208.1_7 [gene=orf5] [locus_tag=G128_gp06] [db_xref=GeneID:14254598] [protein=NS5 protein] [protein_id=YP_009047208.1] [location=26840..27514] [gbkey=CDS]	'42: ALAVNVCLIPLLLLLRQ'; '63: RSIIRTMVLYFLVLYNF'; '94: GSCLIAFLVILIILWFV'; '112: RIRFCLMLNSYIPLFDM'; '193: DFSLNGNVSTVFVPATR';	5
		lcl|NC_019843.3_prot_YP_009047209.1_8 [gene=E] [locus_tag=G128_gp07] [db_xref=GeneID:14254599] [protein=envelope protein] [protein_id=YP_009047209.1] [location=27590..27838] [gbkey=CDS]	'2: LPFVQERIGLFIVNFFI'; '22: VCAITLLVCMAFLTATR';	2
		lcl|NC_019843.3_prot_YP_009047210.1_9 [gene=M] [locus_tag=G128_gp08] [db_xref=GeneID:14254600] [protein=membrane protein] [protein_id=YP_009047210.1] [location=27853..28512] [gbkey=CDS]	'18: DWNFAWSLIFLLITIVL'; '44: TVYVFKMFVLWLLWPSS'; '71: PIDLASQIISGIVAAVS';	3
		lcl|NC_019843.3_prot_YP_009047211.1_10 [gene=N] [locus_tag=G128_gp09] [db_xref=GeneID:14254601] [protein=nucleoprotein] [protein_id=YP_009047211.1] [location=28566..29807] [gbkey=CDS]	'211: GDLLYLDLLNRLQALES';	1
HxCx[ST]WxS	0
[RHK][STALV]x[ST]x[PESRDIFTQ]	7
		lcl|NC_019843.3_prot_YP_009047202.1_1 [gene=orf1ab] [locus_tag=G128_gp01] [db_xref=GeneID:14254602] [protein=1AB polyprotein] [exception=ribosomal slippage] [protein_id=YP_009047202.1] [location=join(279..13433,13433..21514)] [gbkey=CDS]	'420: KSFTLI'; '571: KVATIP'; '751: KAKSVQ'; '873: RSVTVE'; '901: KSLSIE'; '1066: KLPSAP'; '1734: KLVTTS'; '2043: RLHTVE'; '2081: RTFTAT'; '2129: KLGTTE'; '2238: RANSFD'; '2503: KTTTGI'; '2889: KSFSDS'; '2961: RTLSTQ'; '3311: HSFSVQ'; '3422: HTGSAF'; '3800: KVSTQE'; '4285: KTGTGI'; '4429: KTNTCR'; '4444: HLDSYF'; '5111: RSTSPD'; '5418: RLATCD'; '5906: KLQSQI'; '6176: HVASND'; '6308: RVHSEF'; '662…	27
		lcl|NC_019843.3_prot_YP_009047203.1_2 [gene=orf1ab] [locus_tag=G128_gp01] [db_xref=GeneID:14254602] [protein=1A polyprotein] [protein_id=YP_009047203.1] [location=279..13454] [gbkey=CDS]	'420: KSFTLI'; '571: KVATIP'; '751: KAKSVQ'; '873: RSVTVE'; '901: KSLSIE'; '1066: KLPSAP'; '1734: KLVTTS'; '2043: RLHTVE'; '2081: RTFTAT'; '2129: KLGTTE'; '2238: RANSFD'; '2503: KTTTGI'; '2889: KSFSDS'; '2961: RTLSTQ'; '3311: HSFSVQ'; '3422: HTGSAF'; '3800: KVSTQE'; '4285: KTGTGI';	18
		lcl|NC_019843.3_prot_YP_009047204.1_3 [gene=S] [locus_tag=G128_gp02] [db_xref=GeneID:14254594] [protein=spike glycoprotein] [protein_id=YP_009047204.1] [location=21456..25517] [gbkey=CDS]	'62: RTYSNI'; '264: HLFSSR'; '413: KLLSLF'; '505: RLLSDD'; '1108: KAQSKR';	5
		lcl|NC_019843.3_prot_YP_009047207.1_6 [gene=orf4b] [locus_tag=G128_gp05] [db_xref=GeneID:14254597] [protein=NS4B protein] [protein_id=YP_009047207.1] [location=26093..26833] [gbkey=CDS]	'24: RSHSPT'; '155: RVNTAI';	2
		lcl|NC_019843.3_prot_YP_009047208.1_7 [gene=orf5] [locus_tag=G128_gp06] [db_xref=GeneID:14254598] [protein=NS5 protein] [protein_id=YP_009047208.1] [location=26840..27514] [gbkey=CDS]	'134: RVSTVS'; '170: HSSTYI';	2
		lcl|NC_019843.3_prot_YP_009047211.1_10 [gene=N] [locus_tag=G128_gp09] [db_xref=GeneID:14254601] [protein=nucleoprotein] [protein_id=YP_009047211.1] [location=28566..29807] [gbkey=CDS]	'174: RASSLS'; '254: RTSTKS'; '285: KLGTED'; '395: RTRTRP';	4
		lcl|NC_019843.3_prot_YP_009047212.1_11 [gene=orf8b] [locus_tag=G128_gp10] [db_xref=GeneID:19910005] [protein=ORF8b protein] [protein_id=YP_009047212.1] [location=28762..29100] [gbkey=CDS]	'93: KTSTLR';	1
Rx{P}[ST]{P}P	1
		lcl|NC_019843.3_prot_YP_009047211.1_10 [gene=N] [locus_tag=G128_gp09] [db_xref=GeneID:14254601] [protein=nucleoprotein] [protein_id=YP_009047211.1] [location=28566..29807] [gbkey=CDS]	'395: RTRTRP';	1
Rxx{P}[ST][IVLM]x	5
		lcl|NC_019843.3_prot_YP_009047202.1_1 [gene=orf1ab] [locus_tag=G128_gp01] [db_xref=GeneID:14254602] [protein=1AB polyprotein] [exception=ribosomal slippage] [protein_id=YP_009047202.1] [location=join(279..13433,13433..21514)] [gbkey=CDS]	'453: RIGDSIF'; '1649: RLLHTVL'; '2521: RGQESLA'; '2958: RITRTLS'; '3013: RLAVSLF'; '3381: RPNYTIK'; '4386: RVRGSIV'; '4741: RHRLSLK'; '5009: RIFASLI'; '6552: RDNCSLE'; '7058: RDNDTLS';	11
		lcl|NC_019843.3_prot_YP_009047203.1_2 [gene=orf1ab] [locus_tag=G128_gp01] [db_xref=GeneID:14254602] [protein=1A polyprotein] [protein_id=YP_009047203.1] [location=279..13454] [gbkey=CDS]	'453: RIGDSIF'; '1649: RLLHTVL'; '2521: RGQESLA'; '2958: RITRTLS'; '3013: RLAVSLF'; '3381: RPNYTIK';	6
		lcl|NC_019843.3_prot_YP_009047204.1_3 [gene=S] [locus_tag=G128_gp02] [db_xref=GeneID:14254594] [protein=spike glycoprotein] [protein_id=YP_009047204.1] [location=21456..25517] [gbkey=CDS]	'652: RACVSVP'; '691: RSTRSML'; '748: RSVRSVP'; '841: RQDDSVR';	4
		lcl|NC_019843.3_prot_YP_009047211.1_10 [gene=N] [locus_tag=G128_gp09] [db_xref=GeneID:14254601] [protein=nucleoprotein] [protein_id=YP_009047211.1] [location=28566..29807] [gbkey=CDS]	'387: RVQGSIT';	1
		lcl|NC_019843.3_prot_YP_009047212.1_11 [gene=orf8b] [locus_tag=G128_gp10] [db_xref=GeneID:19910005] [protein=ORF8b protein] [protein_id=YP_009047212.1] [location=28762..29100] [gbkey=CDS]	'72: RGTLTMI';	1
Gx(1,2)GxxG	3
		lcl|NC_019843.3_prot_YP_009047202.1_1 [gene=orf1ab] [locus_tag=G128_gp01] [db_xref=GeneID:14254602] [protein=1AB polyprotein] [exception=ribosomal slippage] [protein_id=YP_009047202.1] [location=join(279..13433,13433..21514)] [gbkey=CDS]	'1153: GGGIAG'; '3393: GSCGSVG';	2
		lcl|NC_019843.3_prot_YP_009047203.1_2 [gene=orf1ab] [locus_tag=G128_gp01] [db_xref=GeneID:14254602] [protein=1A polyprotein] [protein_id=YP_009047203.1] [location=279..13454] [gbkey=CDS]	'1153: GGGIAG'; '3393: GSCGSVG';	2
		lcl|NC_019843.3_prot_YP_009047211.1_10 [gene=N] [locus_tag=G128_gp09] [db_xref=GeneID:14254601] [protein=nucleoprotein] [protein_id=YP_009047211.1] [location=28566..29807] [gbkey=CDS]	'205: GIGAVG';	1
Gxxx[GA]	7
		lcl|NC_019843.3_prot_YP_009047202.1_1 [gene=orf1ab] [locus_tag=G128_gp01] [db_xref=GeneID:14254602] [protein=1AB polyprotein] [exception=ribosomal slippage] [protein_id=YP_009047202.1] [location=join(279..13433,13433..21514)] [gbkey=CDS]	'14: GTYRA'; '114: GSLVG'; '123: GKPIG'; '354: GFACG'; '428: GVAYA'; '435: GCEEG'; '549: GLQYA'; '1153: GGGIA'; '1158: GAINA'; '1192: GHSLA'; '1240: GVKPA'; '1286: GLRGA'; '1752: GIETA'; '1861: GQPGG'; '2101: GVTKG'; '2144: GVVTG'; '2225: GISSA'; '2232: GLASA'; '2592: GVRRG'; '2755: GYVLA'; '2844: GVAGA'; '3000: GVYCG'; '3258: GDVEA'; '3370: GRPTG'; '3420: GTHTG'; '3429: GTMYG'; '4224: GQVLG'; '4…	45
		lcl|NC_019843.3_prot_YP_009047203.1_2 [gene=orf1ab] [locus_tag=G128_gp01] [db_xref=GeneID:14254602] [protein=1A polyprotein] [protein_id=YP_009047203.1] [location=279..13454] [gbkey=CDS]	'14: GTYRA'; '114: GSLVG'; '123: GKPIG'; '354: GFACG'; '428: GVAYA'; '435: GCEEG'; '549: GLQYA'; '1153: GGGIA'; '1158: GAINA'; '1192: GHSLA'; '1240: GVKPA'; '1286: GLRGA'; '1752: GIETA'; '1861: GQPGG'; '2101: GVTKG'; '2144: GVVTG'; '2225: GISSA'; '2232: GLASA'; '2592: GVRRG'; '2755: GYVLA'; '2844: GVAGA'; '3000: GVYCG'; '3258: GDVEA'; '3370: GRPTG'; '3420: GTHTG'; '3429: GTMYG'; '4224: GQVLG'; '4…	28
		lcl|NC_019843.3_prot_YP_009047204.1_3 [gene=S] [locus_tag=G128_gp02] [db_xref=GeneID:14254594] [protein=spike glycoprotein] [protein_id=YP_009047204.1] [location=21456..25517] [gbkey=CDS]	'90: GHATG'; '150: GSSVG'; '552: GWLVA'; '558: GSTVA'; '712: GCVLG'; '882: GSRSA'; '904: GYMQG'; '916: GPASA'; '953: GSIAG'; '959: GWTAG'; '1045: GAISA'; '1154: GLCDA'; '1224: GNSTG'; '1302: GFIAG';	14
		lcl|NC_019843.3_prot_YP_009047206.1_5 [gene=orf4a] [locus_tag=G128_gp04] [db_xref=GeneID:14254596] [protein=NS4A protein] [protein_id=YP_009047206.1] [location=25852..26181] [gbkey=CDS]	'83: GIPDG';	1
		lcl|NC_019843.3_prot_YP_009047208.1_7 [gene=orf5] [locus_tag=G128_gp06] [db_xref=GeneID:14254598] [protein=NS5 protein] [protein_id=YP_009047208.1] [location=26840..27514] [gbkey=CDS]	'38: GYVAA';	1
		lcl|NC_019843.3_prot_YP_009047210.1_9 [gene=M] [locus_tag=G128_gp08] [db_xref=GeneID:14254600] [protein=membrane protein] [protein_id=YP_009047210.1] [location=27853..28512] [gbkey=CDS]	'81: GIVAA'; '152: GMHFG'; '187: GTNSG';	3
		lcl|NC_019843.3_prot_YP_009047211.1_10 [gene=N] [locus_tag=G128_gp09] [db_xref=GeneID:14254601] [protein=nucleoprotein] [protein_id=YP_009047211.1] [location=28566..29807] [gbkey=CDS]	'106: GPEAA'; '127: GATDA'; '189: GSRSG'; '198: GTSPG'; '207: GAVGG'; '272: GDLQG';	6
GxxxG	6
		lcl|NC_019843.3_prot_YP_009047202.1_1 [gene=orf1ab] [locus_tag=G128_gp01] [db_xref=GeneID:14254602] [protein=1AB polyprotein] [exception=ribosomal slippage] [protein_id=YP_009047202.1] [location=join(279..13433,13433..21514)] [gbkey=CDS]	'114: GSLVG'; '123: GKPIG'; '354: GFACG'; '435: GCEEG'; '1154: GGIAG'; '1861: GQPGG'; '2101: GVTKG'; '2144: GVVTG'; '2592: GVRRG'; '3000: GVYCG'; '3370: GRPTG'; '3420: GTHTG'; '3429: GTMYG'; '4224: GQVLG'; '5057: GTSSG'; '5152: GYIAG'; '5397: GLVFG'; '6018: GFSTG'; '6241: GNPKG'; '6317: GCDGG'; '6445: GHFIG'; '6848: GSDKG'; '6979: GFLLG';	23
		lcl|NC_019843.3_prot_YP_009047203.1_2 [gene=orf1ab] [locus_tag=G128_gp01] [db_xref=GeneID:14254602] [protein=1A polyprotein] [protein_id=YP_009047203.1] [location=279..13454] [gbkey=CDS]	'114: GSLVG'; '123: GKPIG'; '354: GFACG'; '435: GCEEG'; '1154: GGIAG'; '1861: GQPGG'; '2101: GVTKG'; '2144: GVVTG'; '2592: GVRRG'; '3000: GVYCG'; '3370: GRPTG'; '3420: GTHTG'; '3429: GTMYG'; '4224: GQVLG';	14
		lcl|NC_019843.3_prot_YP_009047204.1_3 [gene=S] [locus_tag=G128_gp02] [db_xref=GeneID:14254594] [protein=spike glycoprotein] [protein_id=YP_009047204.1] [location=21456..25517] [gbkey=CDS]	'90: GHATG'; '150: GSSVG'; '712: GCVLG'; '904: GYMQG'; '953: GSIAG'; '959: GWTAG'; '1224: GNSTG'; '1302: GFIAG';	8
		lcl|NC_019843.3_prot_YP_009047206.1_5 [gene=orf4a] [locus_tag=G128_gp04] [db_xref=GeneID:14254596] [protein=NS4A protein] [protein_id=YP_009047206.1] [location=25852..26181] [gbkey=CDS]	'83: GIPDG';	1
		lcl|NC_019843.3_prot_YP_009047210.1_9 [gene=M] [locus_tag=G128_gp08] [db_xref=GeneID:14254600] [protein=membrane protein] [protein_id=YP_009047210.1] [location=27853..28512] [gbkey=CDS]	'152: GMHFG'; '187: GTNSG';	2
		lcl|NC_019843.3_prot_YP_009047211.1_10 [gene=N] [locus_tag=G128_gp09] [db_xref=GeneID:14254601] [protein=nucleoprotein] [protein_id=YP_009047211.1] [location=28566..29807] [gbkey=CDS]	'189: GSRSG'; '198: GTSPG'; '207: GAVGG'; '272: GDLQG';	4
CxxxC	3
		lcl|NC_019843.3_prot_YP_009047202.1_1 [gene=orf1ab] [locus_tag=G128_gp01] [db_xref=GeneID:14254602] [protein=1AB polyprotein] [exception=ribosomal slippage] [protein_id=YP_009047202.1] [location=join(279..13433,13433..21514)] [gbkey=CDS]	'394: CSSNC'; '966: CDEEC'; '4684: CVLHC'; '5336: CCKCC'; '6089: CTFVC'; '6378: CITAC';	6
		lcl|NC_019843.3_prot_YP_009047203.1_2 [gene=orf1ab] [locus_tag=G128_gp01] [db_xref=GeneID:14254602] [protein=1A polyprotein] [protein_id=YP_009047203.1] [location=279..13454] [gbkey=CDS]	'394: CSSNC'; '966: CDEEC';	2
		lcl|NC_019843.3_prot_YP_009047204.1_3 [gene=S] [locus_tag=G128_gp02] [db_xref=GeneID:14254594] [protein=spike glycoprotein] [protein_id=YP_009047204.1] [location=21456..25517] [gbkey=CDS]	'650: CLRAC'; '1319: CCTGC'; '1333: CNRCC';	3
CxxC	5
		lcl|NC_019843.3_prot_YP_009047202.1_1 [gene=orf1ab] [locus_tag=G128_gp01] [db_xref=GeneID:14254602] [protein=1AB polyprotein] [exception=ribosomal slippage] [protein_id=YP_009047202.1] [location=join(279..13433,13433..21514)] [gbkey=CDS]	'338: CGSC'; '383: CATC'; '1672: CNVC'; '2255: CNWC'; '2378: CLLC'; '2421: CVDC'; '2707: CRKC'; '3392: CGSC'; '3877: CVKC'; '4311: CLYC'; '4354: CNVC'; '4676: CVNC'; '5315: CVVC'; '5326: CGTC'; '5336: CCKC'; '5751: CYRC'; '6115: CCMC';	17
		lcl|NC_019843.3_prot_YP_009047203.1_2 [gene=orf1ab] [locus_tag=G128_gp01] [db_xref=GeneID:14254602] [protein=1A polyprotein] [protein_id=YP_009047203.1] [location=279..13454] [gbkey=CDS]	'338: CGSC'; '383: CATC'; '1672: CNVC'; '2255: CNWC'; '2378: CLLC'; '2421: CVDC'; '2707: CRKC'; '3392: CGSC'; '3877: CVKC'; '4311: CLYC'; '4354: CNVC';	11
		lcl|NC_019843.3_prot_YP_009047204.1_3 [gene=S] [locus_tag=G128_gp02] [db_xref=GeneID:14254594] [protein=spike glycoprotein] [protein_id=YP_009047204.1] [location=21456..25517] [gbkey=CDS]	'1320: CTGC'; '1333: CNRC';	2
		lcl|NC_019843.3_prot_YP_009047208.1_7 [gene=orf5] [locus_tag=G128_gp06] [db_xref=GeneID:14254598] [protein=NS5 protein] [protein_id=YP_009047208.1] [location=26840..27514] [gbkey=CDS]	'163: CSRC';	1
		lcl|NC_019843.3_prot_YP_009047209.1_8 [gene=E] [locus_tag=G128_gp07] [db_xref=GeneID:14254599] [protein=envelope protein] [protein_id=YP_009047209.1] [location=27590..27838] [gbkey=CDS]	'40: CVQC';	1
PPxY	2
		lcl|NC_019843.3_prot_YP_009047202.1_1 [gene=orf1ab] [locus_tag=G128_gp01] [db_xref=GeneID:14254602] [protein=1AB polyprotein] [exception=ribosomal slippage] [protein_id=YP_009047202.1] [location=join(279..13433,13433..21514)] [gbkey=CDS]	'283: PPHY';	1
		lcl|NC_019843.3_prot_YP_009047203.1_2 [gene=orf1ab] [locus_tag=G128_gp01] [db_xref=GeneID:14254602] [protein=1A polyprotein] [protein_id=YP_009047203.1] [location=279..13454] [gbkey=CDS]	'283: PPHY';	1
HxxxW	3
		lcl|NC_019843.3_prot_YP_009047202.1_1 [gene=orf1ab] [locus_tag=G128_gp01] [db_xref=GeneID:14254602] [protein=1AB polyprotein] [exception=ribosomal slippage] [protein_id=YP_009047202.1] [location=join(279..13433,13433..21514)] [gbkey=CDS]	'1720: HTTPW'; '4991: HLMGW';	2
		lcl|NC_019843.3_prot_YP_009047203.1_2 [gene=orf1ab] [locus_tag=G128_gp01] [db_xref=GeneID:14254602] [protein=1A polyprotein] [protein_id=YP_009047203.1] [location=279..13454] [gbkey=CDS]	'1720: HTTPW';	1
		lcl|NC_019843.3_prot_YP_009047206.1_5 [gene=orf4a] [locus_tag=G128_gp04] [db_xref=GeneID:14254596] [protein=NS4A protein] [protein_id=YP_009047206.1] [location=25852..26181] [gbkey=CDS]	'41: HPVLW';	1
GKYLQRRLQ	0
P[TS]AP	2
		lcl|NC_019843.3_prot_YP_009047202.1_1 [gene=orf1ab] [locus_tag=G128_gp01] [db_xref=GeneID:14254602] [protein=1AB polyprotein] [exception=ribosomal slippage] [protein_id=YP_009047202.1] [location=join(279..13433,13433..21514)] [gbkey=CDS]	'1068: PSAP';	1
		lcl|NC_019843.3_prot_YP_009047203.1_2 [gene=orf1ab] [locus_tag=G128_gp01] [db_xref=GeneID:14254602] [protein=1A polyprotein] [protein_id=YP_009047203.1] [location=279..13454] [gbkey=CDS]	'1068: PSAP';	1
YxxL	8
		lcl|NC_019843.3_prot_YP_009047202.1_1 [gene=orf1ab] [locus_tag=G128_gp01] [db_xref=GeneID:14254602] [protein=1AB polyprotein] [exception=ribosomal slippage] [protein_id=YP_009047202.1] [location=join(279..13433,13433..21514)] [gbkey=CDS]	'213: YAFL'; '286: YFTL'; '559: YVVL'; '1268: YKSL'; '1284: YDGL'; '1383: YVCL'; '1890: YSFL'; '2268: YPAL'; '2353: YNLL'; '2692: YMKL'; '2771: YLCL'; '3024: YFQL'; '3089: YTAL'; '3176: YAAL'; '3301: YDAL'; '3769: YTCL'; '4073: YPSL'; '4466: YDLL'; '4553: YHKL'; '4616: YSYL'; '4726: YKEL'; '5124: YAFL'; '5270: YKDL'; '5299: YRDL'; '5977: YPKL'; '6370: YVPL'; '6771: YPRL'; '6822: YMQL'; '7074: YRK…	29
		lcl|NC_019843.3_prot_YP_009047203.1_2 [gene=orf1ab] [locus_tag=G128_gp01] [db_xref=GeneID:14254602] [protein=1A polyprotein] [protein_id=YP_009047203.1] [location=279..13454] [gbkey=CDS]	'213: YAFL'; '286: YFTL'; '559: YVVL'; '1268: YKSL'; '1284: YDGL'; '1383: YVCL'; '1890: YSFL'; '2268: YPAL'; '2353: YNLL'; '2692: YMKL'; '2771: YLCL'; '3024: YFQL'; '3089: YTAL'; '3176: YAAL'; '3301: YDAL'; '3769: YTCL'; '4073: YPSL';	17
		lcl|NC_019843.3_prot_YP_009047204.1_3 [gene=S] [locus_tag=G128_gp02] [db_xref=GeneID:14254594] [protein=spike glycoprotein] [protein_id=YP_009047204.1] [location=21456..25517] [gbkey=CDS]	'71: YQGL'; '184: YCIL'; '231: YFNL'; '270: YVDL'; '438: YSSL'; '635: YQNL'; '648: YYCL'; '704: YGPL'; '777: YFKL'; '932: YKVL'; '1264: YEML'; '1280: YIDL'; '1298: YIWL';	13
		lcl|NC_019843.3_prot_YP_009047206.1_5 [gene=orf4a] [locus_tag=G128_gp04] [db_xref=GeneID:14254596] [protein=NS4A protein] [protein_id=YP_009047206.1] [location=25852..26181] [gbkey=CDS]	'3: YVSL'; '32: YTPL';	2
		lcl|NC_019843.3_prot_YP_009047207.1_6 [gene=orf4b] [locus_tag=G128_gp05] [db_xref=GeneID:14254597] [protein=NS4B protein] [protein_id=YP_009047207.1] [location=26093..26833] [gbkey=CDS]	'238: YPIL';	1
		lcl|NC_019843.3_prot_YP_009047208.1_7 [gene=orf5] [locus_tag=G128_gp06] [db_xref=GeneID:14254598] [protein=NS5 protein] [protein_id=YP_009047208.1] [location=26840..27514] [gbkey=CDS]	'77: YNFL'; '122: YIPL';	2
		lcl|NC_019843.3_prot_YP_009047210.1_9 [gene=M] [locus_tag=G128_gp08] [db_xref=GeneID:14254600] [protein=membrane protein] [protein_id=YP_009047210.1] [location=27853..28512] [gbkey=CDS]	'160: YDRL';	1
		lcl|NC_019843.3_prot_YP_009047211.1_10 [gene=N] [locus_tag=G128_gp09] [db_xref=GeneID:14254601] [protein=nucleoprotein] [protein_id=YP_009047211.1] [location=28566..29807] [gbkey=CDS]	'44: YTGL'; '215: YLDL';	2
LYPxL	0
RxxK	6
		lcl|NC_019843.3_prot_YP_009047202.1_1 [gene=orf1ab] [locus_tag=G128_gp01] [db_xref=GeneID:14254602] [protein=1AB polyprotein] [exception=ribosomal slippage] [protein_id=YP_009047202.1] [location=join(279..13433,13433..21514)] [gbkey=CDS]	'1101: RLRK'; '1252: REAK'; '1292: RKAK'; '1435: RLNK'; '1583: RSLK'; '2063: RKVK'; '5555: RYVK'; '5753: RCPK'; '5877: RAQK'; '6341: RDLK'; '6572: RKIK';	11
		lcl|NC_019843.3_prot_YP_009047203.1_2 [gene=orf1ab] [locus_tag=G128_gp01] [db_xref=GeneID:14254602] [protein=1A polyprotein] [protein_id=YP_009047203.1] [location=279..13454] [gbkey=CDS]	'1101: RLRK'; '1252: REAK'; '1292: RKAK'; '1435: RLNK'; '1583: RSLK'; '2063: RKVK';	6
		lcl|NC_019843.3_prot_YP_009047207.1_6 [gene=orf4b] [locus_tag=G128_gp05] [db_xref=GeneID:14254597] [protein=NS4B protein] [protein_id=YP_009047207.1] [location=26093..26833] [gbkey=CDS]	'33: RYVK';	1
		lcl|NC_019843.3_prot_YP_009047208.1_7 [gene=orf5] [locus_tag=G128_gp06] [db_xref=GeneID:14254598] [protein=NS5 protein] [protein_id=YP_009047208.1] [location=26840..27514] [gbkey=CDS]	'182: RFSK';	1
		lcl|NC_019843.3_prot_YP_009047211.1_10 [gene=N] [locus_tag=G128_gp09] [db_xref=GeneID:14254601] [protein=nucleoprotein] [protein_id=YP_009047211.1] [location=28566..29807] [gbkey=CDS]	'29: RNPK'; '114: RAVK';	2
		lcl|NC_019843.3_prot_YP_009047212.1_11 [gene=orf8b] [locus_tag=G128_gp10] [db_xref=GeneID:19910005] [protein=ORF8b protein] [protein_id=YP_009047212.1] [location=28762..29100] [gbkey=CDS]	'16: RTEK';	1
LGxGxxIxW	0
PPLP	1
		lcl|NC_019843.3_prot_YP_009047209.1_8 [gene=E] [locus_tag=G128_gp07] [db_xref=GeneID:14254599] [protein=envelope protein] [protein_id=YP_009047209.1] [location=27590..27838] [gbkey=CDS]	'74: PPLP';	1
SLxYLA	0
T[QDE]x(5)ADx(2)[IL]	0
VxHxMY	0
Rx[LC]	8
		lcl|NC_019843.3_prot_YP_009047202.1_1 [gene=orf1ab] [locus_tag=G128_gp01] [db_xref=GeneID:14254602] [protein=1AB polyprotein] [exception=ribosomal slippage] [protein_id=YP_009047202.1] [location=join(279..13433,13433..21514)] [gbkey=CDS]	'81: RHL'; '511: RQL'; '630: RIL'; '1257: RVL'; '1583: RSL'; '1649: RLL'; '1715: RQL'; '2098: RHL'; '2176: RLL'; '2708: RKC'; '2788: RIL'; '2961: RTL'; '3012: RRL'; '3190: RFL'; '3986: RKL'; '4210: RYL'; '4470: RDC'; '4635: RDC'; '5214: RIL'; '5300: RDL'; '5471: RQL'; '5719: RTL'; '6167: RYC'; '6186: RCL'; '6341: RDL'; '6627: RSC'; '7075: RKL';	27
		lcl|NC_019843.3_prot_YP_009047203.1_2 [gene=orf1ab] [locus_tag=G128_gp01] [db_xref=GeneID:14254602] [protein=1A polyprotein] [protein_id=YP_009047203.1] [location=279..13454] [gbkey=CDS]	'81: RHL'; '511: RQL'; '630: RIL'; '1257: RVL'; '1583: RSL'; '1649: RLL'; '1715: RQL'; '2098: RHL'; '2176: RLL'; '2708: RKC'; '2788: RIL'; '2961: RTL'; '3012: RRL'; '3190: RFL'; '3986: RKL'; '4210: RYL';	16
		lcl|NC_019843.3_prot_YP_009047204.1_3 [gene=S] [locus_tag=G128_gp02] [db_xref=GeneID:14254594] [protein=spike glycoprotein] [protein_id=YP_009047204.1] [location=21456..25517] [gbkey=CDS]	'235: RNC'; '505: RLL'; '652: RAC'; '847: RNL'; '921: RDL'; '1335: RCC';	6
		lcl|NC_019843.3_prot_YP_009047205.1_4 [gene=orf3] [locus_tag=G128_gp03] [db_xref=GeneID:14254595] [protein=NS3 protein] [protein_id=YP_009047205.1] [location=25532..25843] [gbkey=CDS]	'41: RAC';	1
		lcl|NC_019843.3_prot_YP_009047208.1_7 [gene=orf5] [locus_tag=G128_gp06] [db_xref=GeneID:14254598] [protein=NS5 protein] [protein_id=YP_009047208.1] [location=26840..27514] [gbkey=CDS]	'114: RFC';	1
		lcl|NC_019843.3_prot_YP_009047209.1_8 [gene=E] [locus_tag=G128_gp07] [db_xref=GeneID:14254599] [protein=envelope protein] [protein_id=YP_009047209.1] [location=27590..27838] [gbkey=CDS]	'38: RLC';	1
		lcl|NC_019843.3_prot_YP_009047210.1_9 [gene=M] [locus_tag=G128_gp08] [db_xref=GeneID:14254600] [protein=membrane protein] [protein_id=YP_009047210.1] [location=27853..28512] [gbkey=CDS]	'130: RPL';	1
		lcl|NC_019843.3_prot_YP_009047212.1_11 [gene=orf8b] [locus_tag=G128_gp10] [db_xref=GeneID:19910005] [protein=ORF8b protein] [protein_id=YP_009047212.1] [location=28762..29100] [gbkey=CDS]	'98: RGL';	1
RxL!	4
		lcl|NC_019843.3_prot_YP_009047202.1_1 [gene=orf1ab] [locus_tag=G128_gp01] [db_xref=GeneID:14254602] [protein=1AB polyprotein] [exception=ribosomal slippage] [protein_id=YP_009047202.1] [location=join(279..13433,13433..21514)] [gbkey=CDS]	'81: RHLP'; '511: RQLL'; '1257: RVLV'; '1715: RQLV'; '2098: RHLG'; '2176: RLLL'; '3012: RRLA'; '3190: RFLG'; '4210: RYLY'; '5300: RDLY'; '5471: RQLL'; '5719: RTLL'; '6186: RCLA';	13
		lcl|NC_019843.3_prot_YP_009047203.1_2 [gene=orf1ab] [locus_tag=G128_gp01] [db_xref=GeneID:14254602] [protein=1A polyprotein] [protein_id=YP_009047203.1] [location=279..13454] [gbkey=CDS]	'81: RHLP'; '511: RQLL'; '1257: RVLV'; '1715: RQLV'; '2098: RHLG'; '2176: RLLL'; '3012: RRLA'; '3190: RFLG'; '4210: RYLY';	9
		lcl|NC_019843.3_prot_YP_009047204.1_3 [gene=S] [locus_tag=G128_gp02] [db_xref=GeneID:14254594] [protein=spike glycoprotein] [protein_id=YP_009047204.1] [location=21456..25517] [gbkey=CDS]	'847: RNLF'; '921: RDLI';	2
		lcl|NC_019843.3_prot_YP_009047210.1_9 [gene=M] [locus_tag=G128_gp08] [db_xref=GeneID:14254600] [protein=membrane protein] [protein_id=YP_009047210.1] [location=27853..28512] [gbkey=CDS]	'130: RPLV';	1
RxL[FILV]	4
		lcl|NC_019843.3_prot_YP_009047202.1_1 [gene=orf1ab] [locus_tag=G128_gp01] [db_xref=GeneID:14254602] [protein=1AB polyprotein] [exception=ribosomal slippage] [protein_id=YP_009047202.1] [location=join(279..13433,13433..21514)] [gbkey=CDS]	'511: RQLL'; '1257: RVLV'; '1715: RQLV'; '2176: RLLL'; '5471: RQLL'; '5719: RTLL';	6
		lcl|NC_019843.3_prot_YP_009047203.1_2 [gene=orf1ab] [locus_tag=G128_gp01] [db_xref=GeneID:14254602] [protein=1A polyprotein] [protein_id=YP_009047203.1] [location=279..13454] [gbkey=CDS]	'511: RQLL'; '1257: RVLV'; '1715: RQLV'; '2176: RLLL';	4
		lcl|NC_019843.3_prot_YP_009047204.1_3 [gene=S] [locus_tag=G128_gp02] [db_xref=GeneID:14254594] [protein=spike glycoprotein] [protein_id=YP_009047204.1] [location=21456..25517] [gbkey=CDS]	'847: RNLF'; '921: RDLI';	2
		lcl|NC_019843.3_prot_YP_009047210.1_9 [gene=M] [locus_tag=G128_gp08] [db_xref=GeneID:14254600] [protein=membrane protein] [protein_id=YP_009047210.1] [location=27853..28512] [gbkey=CDS]	'130: RPLV';	1
RxLX!	4
		lcl|NC_019843.3_prot_YP_009047202.1_1 [gene=orf1ab] [locus_tag=G128_gp01] [db_xref=GeneID:14254602] [protein=1AB polyprotein] [exception=ribosomal slippage] [protein_id=YP_009047202.1] [location=join(279..13433,13433..21514)] [gbkey=CDS]	'81: RHLPG'; '1257: RVLVV'; '1583: RSLKL'; '2098: RHLGV'; '2176: RLLLM'; '2788: RILDF'; '3012: RRLAV'; '3190: RFLGL'; '4210: RYLYF'; '5214: RILSA'; '5471: RQLLL'; '6186: RCLAI'; '6341: RDLKP';	13
		lcl|NC_019843.3_prot_YP_009047203.1_2 [gene=orf1ab] [locus_tag=G128_gp01] [db_xref=GeneID:14254602] [protein=1A polyprotein] [protein_id=YP_009047203.1] [location=279..13454] [gbkey=CDS]	'81: RHLPG'; '1257: RVLVV'; '1583: RSLKL'; '2098: RHLGV'; '2176: RLLLM'; '2788: RILDF'; '3012: RRLAV'; '3190: RFLGL'; '4210: RYLYF';	9
		lcl|NC_019843.3_prot_YP_009047204.1_3 [gene=S] [locus_tag=G128_gp02] [db_xref=GeneID:14254594] [protein=spike glycoprotein] [protein_id=YP_009047204.1] [location=21456..25517] [gbkey=CDS]	'847: RNLFA'; '921: RDLIC';	2
		lcl|NC_019843.3_prot_YP_009047212.1_11 [gene=orf8b] [locus_tag=G128_gp10] [db_xref=GeneID:19910005] [protein=ORF8b protein] [protein_id=YP_009047212.1] [location=28762..29100] [gbkey=CDS]	'98: RGLEA';	1
RxLX[FILV]	2
		lcl|NC_019843.3_prot_YP_009047202.1_1 [gene=orf1ab] [locus_tag=G128_gp01] [db_xref=GeneID:14254602] [protein=1AB polyprotein] [exception=ribosomal slippage] [protein_id=YP_009047202.1] [location=join(279..13433,13433..21514)] [gbkey=CDS]	'1257: RVLVV'; '1583: RSLKL'; '2098: RHLGV'; '2788: RILDF'; '3012: RRLAV'; '3190: RFLGL'; '4210: RYLYF'; '5471: RQLLL'; '6186: RCLAI';	9
		lcl|NC_019843.3_prot_YP_009047203.1_2 [gene=orf1ab] [locus_tag=G128_gp01] [db_xref=GeneID:14254602] [protein=1A polyprotein] [protein_id=YP_009047203.1] [location=279..13454] [gbkey=CDS]	'1257: RVLVV'; '1583: RSLKL'; '2098: RHLGV'; '2788: RILDF'; '3012: RRLAV'; '3190: RFLGL'; '4210: RYLYF';	7
CETTG	0
PHQ	0
LPxTG	0
ExxxLV	3
		lcl|NC_019843.3_prot_YP_009047202.1_1 [gene=orf1ab] [locus_tag=G128_gp01] [db_xref=GeneID:14254602] [protein=1AB polyprotein] [exception=ribosomal slippage] [protein_id=YP_009047202.1] [location=join(279..13433,13433..21514)] [gbkey=CDS]	'1426: EGELLV'; '6401: EAYNLV';	2
		lcl|NC_019843.3_prot_YP_009047203.1_2 [gene=orf1ab] [locus_tag=G128_gp01] [db_xref=GeneID:14254602] [protein=1A polyprotein] [protein_id=YP_009047203.1] [location=279..13454] [gbkey=CDS]	'1426: EGELLV';	1
		lcl|NC_019843.3_prot_YP_009047204.1_3 [gene=S] [locus_tag=G128_gp02] [db_xref=GeneID:14254594] [protein=spike glycoprotein] [protein_id=YP_009047204.1] [location=21456..25517] [gbkey=CDS]	'513: EVPQLV';	1
!!xSxS[DE][DE][DE]	0
!Kx[DE]	5
		lcl|NC_019843.3_prot_YP_009047202.1_1 [gene=orf1ab] [locus_tag=G128_gp01] [db_xref=GeneID:14254602] [protein=1AB polyprotein] [exception=ribosomal slippage] [protein_id=YP_009047202.1] [location=join(279..13433,13433..21514)] [gbkey=CDS]	'64: LKKE'; '389: AKGD'; '1209: AKQD'; '1656: AKAE'; '1771: LKFD'; '1894: PKED'; '2652: VKPD'; '4294: VKPE'; '4998: PKCD'; '5226: VKTD'; '5773: AKKE'; '5968: FKLD'; '6726: LKLD';	13
		lcl|NC_019843.3_prot_YP_009047203.1_2 [gene=orf1ab] [locus_tag=G128_gp01] [db_xref=GeneID:14254602] [protein=1A polyprotein] [protein_id=YP_009047203.1] [location=279..13454] [gbkey=CDS]	'64: LKKE'; '389: AKGD'; '1209: AKQD'; '1656: AKAE'; '1771: LKFD'; '1894: PKED'; '2652: VKPD'; '4294: VKPE';	8
		lcl|NC_019843.3_prot_YP_009047204.1_3 [gene=S] [locus_tag=G128_gp02] [db_xref=GeneID:14254594] [protein=spike glycoprotein] [protein_id=YP_009047204.1] [location=21456..25517] [gbkey=CDS]	'452: MKSD'; '586: PKLE';	2
		lcl|NC_019843.3_prot_YP_009047206.1_5 [gene=orf4a] [locus_tag=G128_gp04] [db_xref=GeneID:14254596] [protein=NS4A protein] [protein_id=YP_009047206.1] [location=25852..26181] [gbkey=CDS]	'66: AKQD';	1
		lcl|NC_019843.3_prot_YP_009047211.1_10 [gene=N] [locus_tag=G128_gp09] [db_xref=GeneID:14254601] [protein=nucleoprotein] [protein_id=YP_009047211.1] [location=28566..29807] [gbkey=CDS]	'335: IKLD'; '362: PKKE'; '371: PKEE';	3
[FILV][FILV]xSxS[DE][DE][DE]	0
[FILV]Kx[DE]	3
		lcl|NC_019843.3_prot_YP_009047202.1_1 [gene=orf1ab] [locus_tag=G128_gp01] [db_xref=GeneID:14254602] [protein=1AB polyprotein] [exception=ribosomal slippage] [protein_id=YP_009047202.1] [location=join(279..13433,13433..21514)] [gbkey=CDS]	'64: LKKE'; '1771: LKFD'; '2652: VKPD'; '4294: VKPE'; '5226: VKTD'; '5968: FKLD'; '6726: LKLD';	7
		lcl|NC_019843.3_prot_YP_009047203.1_2 [gene=orf1ab] [locus_tag=G128_gp01] [db_xref=GeneID:14254602] [protein=1A polyprotein] [protein_id=YP_009047203.1] [location=279..13454] [gbkey=CDS]	'64: LKKE'; '1771: LKFD'; '2652: VKPD'; '4294: VKPE';	4
		lcl|NC_019843.3_prot_YP_009047211.1_10 [gene=N] [locus_tag=G128_gp09] [db_xref=GeneID:14254601] [protein=nucleoprotein] [protein_id=YP_009047211.1] [location=28566..29807] [gbkey=CDS]	'335: IKLD';	1
[VI]x[VI][VI]	6
		lcl|NC_019843.3_prot_YP_009047202.1_1 [gene=orf1ab] [locus_tag=G128_gp01] [db_xref=GeneID:14254602] [protein=1AB polyprotein] [exception=ribosomal slippage] [protein_id=YP_009047202.1] [location=join(279..13433,13433..21514)] [gbkey=CDS]	'728: IAVI'; '1123: VTIV'; '1258: VLVV'; '1353: VGII'; '1973: VDVV'; '2052: INVV'; '2839: VAVI'; '3008: IDIV'; '3064: IAVV'; '3168: IFVI'; '3452: VNVV'; '3678: VLVI'; '4085: ITVI'; '4609: VAIV'; '5680: ILVV'; '6030: VGVV'; '6246: IPIV'; '6456: VAVV';	18
		lcl|NC_019843.3_prot_YP_009047203.1_2 [gene=orf1ab] [locus_tag=G128_gp01] [db_xref=GeneID:14254602] [protein=1A polyprotein] [protein_id=YP_009047203.1] [location=279..13454] [gbkey=CDS]	'728: IAVI'; '1123: VTIV'; '1258: VLVV'; '1353: VGII'; '1973: VDVV'; '2052: INVV'; '2839: VAVI'; '3008: IDIV'; '3064: IAVV'; '3168: IFVI'; '3452: VNVV'; '3678: VLVI'; '4085: ITVI';	13
		lcl|NC_019843.3_prot_YP_009047204.1_3 [gene=S] [locus_tag=G128_gp02] [db_xref=GeneID:14254594] [protein=spike glycoprotein] [protein_id=YP_009047204.1] [location=21456..25517] [gbkey=CDS]	'527: VSIV'; '659: VSVI'; '1147: IEVV';	3
		lcl|NC_019843.3_prot_YP_009047207.1_6 [gene=orf4b] [locus_tag=G128_gp05] [db_xref=GeneID:14254597] [protein=NS4B protein] [protein_id=YP_009047207.1] [location=26093..26833] [gbkey=CDS]	'219: VDVV';	1
		lcl|NC_019843.3_prot_YP_009047208.1_7 [gene=orf5] [locus_tag=G128_gp06] [db_xref=GeneID:14254598] [protein=NS5 protein] [protein_id=YP_009047208.1] [location=26840..27514] [gbkey=CDS]	'103: ILII'; '144: VPVI';	2
		lcl|NC_019843.3_prot_YP_009047210.1_9 [gene=M] [locus_tag=G128_gp08] [db_xref=GeneID:14254600] [protein=membrane protein] [protein_id=YP_009047210.1] [location=27853..28512] [gbkey=CDS]	'13: IAII'; '30: ITIV';	2
GK[DE]x[ST]NPLxxxxLxK	0
RRRRx(5)Rx(4)RK	0
Rx[RK]RGLF	0
RxRRGLF	0
RxxRGLF	0
WxxxWx(9)W	0
KGD	2
		lcl|NC_019843.3_prot_YP_009047202.1_1 [gene=orf1ab] [locus_tag=G128_gp01] [db_xref=GeneID:14254602] [protein=1AB polyprotein] [exception=ribosomal slippage] [protein_id=YP_009047202.1] [location=join(279..13433,13433..21514)] [gbkey=CDS]	'390: KGD';	1
		lcl|NC_019843.3_prot_YP_009047203.1_2 [gene=orf1ab] [locus_tag=G128_gp01] [db_xref=GeneID:14254602] [protein=1A polyprotein] [protein_id=YP_009047203.1] [location=279..13454] [gbkey=CDS]	'390: KGD';	1
KGE	0
[DE]xxxL[LI]	5
		lcl|NC_019843.3_prot_YP_009047202.1_1 [gene=orf1ab] [locus_tag=G128_gp01] [db_xref=GeneID:14254602] [protein=1AB polyprotein] [exception=ribosomal slippage] [protein_id=YP_009047202.1] [location=join(279..13433,13433..21514)] [gbkey=CDS]	'1628: DFIALI'; '1646: DASRLL'; '1897: DGDVLL'; '2375: DTACLL'; '2661: DLGSLI'; '5470: ERQLLL';	6
		lcl|NC_019843.3_prot_YP_009047203.1_2 [gene=orf1ab] [locus_tag=G128_gp01] [db_xref=GeneID:14254602] [protein=1A polyprotein] [protein_id=YP_009047203.1] [location=279..13454] [gbkey=CDS]	'1628: DFIALI'; '1646: DASRLL'; '1897: DGDVLL'; '2375: DTACLL'; '2661: DLGSLI'; '4386: ESGVLL';	6
		lcl|NC_019843.3_prot_YP_009047204.1_3 [gene=S] [locus_tag=G128_gp02] [db_xref=GeneID:14254594] [protein=spike glycoprotein] [protein_id=YP_009047204.1] [location=21456..25517] [gbkey=CDS]	'384: DFSPLL'; '992: ENQKLI';	2
		lcl|NC_019843.3_prot_YP_009047206.1_5 [gene=orf4a] [locus_tag=G128_gp04] [db_xref=GeneID:14254596] [protein=NS4A protein] [protein_id=YP_009047206.1] [location=25852..26181] [gbkey=CDS]	'2: DYVSLL';	1
		lcl|NC_019843.3_prot_YP_009047210.1_9 [gene=M] [locus_tag=G128_gp08] [db_xref=GeneID:14254600] [protein=membrane protein] [protein_id=YP_009047210.1] [location=27853..28512] [gbkey=CDS]	'114: ETNCLL';	1
[AG]xxxxGK[ST]	1
		lcl|NC_019843.3_prot_YP_009047202.1_1 [gene=orf1ab] [locus_tag=G128_gp01] [db_xref=GeneID:14254602] [protein=1AB polyprotein] [exception=ribosomal slippage] [protein_id=YP_009047202.1] [location=join(279..13433,13433..21514)] [gbkey=CDS]	'5592: GPPGTGKS';	1
!!!!DxDxR	0
[FILV][FILV][FILV][FILV]DxDxR	0
!!!!D	10
		lcl|NC_019843.3_prot_YP_009047202.1_1 [gene=orf1ab] [locus_tag=G128_gp01] [db_xref=GeneID:14254602] [protein=1AB polyprotein] [exception=ribosomal slippage] [protein_id=YP_009047202.1] [location=join(279..13433,13433..21514)] [gbkey=CDS]	'47: PWFMD'; '129: FFPYD'; '190: LIGGD'; '202: MCGVD'; '536: GPFMD'; '598: VFPYD'; '810: VIVGD'; '860: AFGGD'; '927: MPIPD'; '1006: AAAVD'; '1012: AFPLD'; '1042: VVIAD'; '1052: PVVPD'; '1125: IVLGD'; '1202: VVGPD'; '1535: LYLAD'; '1553: YGPVD'; '1576: MVVCD'; '1641: FGAPD'; '1875: LLGFD'; '2513: FIIYD'; '2542: ILLVD'; '2826: GGVYD'; '3276: GLWLD'; '3290: MCPAD'; '3433: GAFMD'; '3794: MGVYD'; '405…	50
		lcl|NC_019843.3_prot_YP_009047203.1_2 [gene=orf1ab] [locus_tag=G128_gp01] [db_xref=GeneID:14254602] [protein=1A polyprotein] [protein_id=YP_009047203.1] [location=279..13454] [gbkey=CDS]	'47: PWFMD'; '129: FFPYD'; '190: LIGGD'; '202: MCGVD'; '536: GPFMD'; '598: VFPYD'; '810: VIVGD'; '860: AFGGD'; '927: MPIPD'; '1006: AAAVD'; '1012: AFPLD'; '1042: VVIAD'; '1052: PVVPD'; '1125: IVLGD'; '1202: VVGPD'; '1535: LYLAD'; '1553: YGPVD'; '1576: MVVCD'; '1641: FGAPD'; '1875: LLGFD'; '2513: FIIYD'; '2542: ILLVD'; '2826: GGVYD'; '3276: GLWLD'; '3290: MCPAD'; '3433: GAFMD'; '3794: MGVYD'; '405…	29
		lcl|NC_019843.3_prot_YP_009047204.1_3 [gene=S] [locus_tag=G128_gp02] [db_xref=GeneID:14254594] [protein=spike glycoprotein] [protein_id=YP_009047204.1] [location=21456..25517] [gbkey=CDS]	'170: VLLPD'; '284: LPVYD'; '736: CALPD'; '864: GFGGD'; '936: PPLMD'; '1153: YGLCD';	6
		lcl|NC_019843.3_prot_YP_009047206.1_5 [gene=orf4a] [locus_tag=G128_gp04] [db_xref=GeneID:14254596] [protein=NS4A protein] [protein_id=YP_009047206.1] [location=25852..26181] [gbkey=CDS]	'82: GGIPD';	1
		lcl|NC_019843.3_prot_YP_009047207.1_6 [gene=orf4b] [locus_tag=G128_gp05] [db_xref=GeneID:14254597] [protein=NS4B protein] [protein_id=YP_009047207.1] [location=26093..26833] [gbkey=CDS]	'216: PLAVD';	1
		lcl|NC_019843.3_prot_YP_009047208.1_7 [gene=orf5] [locus_tag=G128_gp06] [db_xref=GeneID:14254598] [protein=NS5 protein] [protein_id=YP_009047208.1] [location=26840..27514] [gbkey=CDS]	'107: LWFVD'; '123: IPLFD';	2
		lcl|NC_019843.3_prot_YP_009047209.1_8 [gene=E] [locus_tag=G128_gp07] [db_xref=GeneID:14254599] [protein=envelope protein] [protein_id=YP_009047209.1] [location=27590..27838] [gbkey=CDS]	'75: PLPPD';	1
		lcl|NC_019843.3_prot_YP_009047210.1_9 [gene=M] [locus_tag=G128_gp08] [db_xref=GeneID:14254600] [protein=membrane protein] [protein_id=YP_009047210.1] [location=27853..28512] [gbkey=CDS]	'69: VYPID'; '155: FGACD';	2
		lcl|NC_019843.3_prot_YP_009047211.1_10 [gene=N] [locus_tag=G128_gp09] [db_xref=GeneID:14254601] [protein=nucleoprotein] [protein_id=YP_009047211.1] [location=28566..29807] [gbkey=CDS]	'208: AVGGD'; '213: LLYLD'; '405: GPMID';	3
		lcl|NC_019843.3_prot_YP_009047212.1_11 [gene=orf8b] [locus_tag=G128_gp10] [db_xref=GeneID:19910005] [protein=ORF8b protein] [protein_id=YP_009047212.1] [location=28762..29100] [gbkey=CDS]	'11: GIGGD';	1
!!!DxxP	2
		lcl|NC_019843.3_prot_YP_009047202.1_1 [gene=orf1ab] [locus_tag=G128_gp01] [db_xref=GeneID:14254602] [protein=1AB polyprotein] [exception=ribosomal slippage] [protein_id=YP_009047202.1] [location=join(279..13433,13433..21514)] [gbkey=CDS]	'191: IGGDVTP'; '203: CGVDGKP'; '4711: IFVDGVP'; '5240: LAIDAYP'; '5381: FCVDHRP';	5
		lcl|NC_019843.3_prot_YP_009047203.1_2 [gene=orf1ab] [locus_tag=G128_gp01] [db_xref=GeneID:14254602] [protein=1A polyprotein] [protein_id=YP_009047203.1] [location=279..13454] [gbkey=CDS]	'191: IGGDVTP'; '203: CGVDGKP';	2
[FILV][FILV][FILV][FILV]D	2
		lcl|NC_019843.3_prot_YP_009047202.1_1 [gene=orf1ab] [locus_tag=G128_gp01] [db_xref=GeneID:14254602] [protein=1AB polyprotein] [exception=ribosomal slippage] [protein_id=YP_009047202.1] [location=join(279..13433,13433..21514)] [gbkey=CDS]	'2542: ILLVD'; '4480: FFIFD'; '5680: ILVVD';	3
		lcl|NC_019843.3_prot_YP_009047203.1_2 [gene=orf1ab] [locus_tag=G128_gp01] [db_xref=GeneID:14254602] [protein=1A polyprotein] [protein_id=YP_009047203.1] [location=279..13454] [gbkey=CDS]	'2542: ILLVD';	1
[FILV][FILV][FILV]DxxP	1
		lcl|NC_019843.3_prot_YP_009047202.1_1 [gene=orf1ab] [locus_tag=G128_gp01] [db_xref=GeneID:14254602] [protein=1AB polyprotein] [exception=ribosomal slippage] [protein_id=YP_009047202.1] [location=join(279..13433,13433..21514)] [gbkey=CDS]	'4711: IFVDGVP';	1

## Sheet: bat-SL-CoVZC45
Motif	Number of protein	Name of the proteins	Position: Sequence	Number of instance of the motif
Cx(13,20)Cx(5,6)Cx(9,19)Cx(10,14)Cx(4,14)C	0
KLGxGLxF[DN]	0
KxGGLxF[DN]	0
KRAR	0
KxGFFKR	0
SVSVGMKPSPRP	0
L[FL][VI]F[VIL]LE[LF]LLxF	0
LxCxE	0
!PxV	2
		lcl|MG772933.1_prot_AVP78030.1_1 [protein=non-structural polyprotein 1ab] [exception=ribosomal slippage] [protein_id=AVP78030.1] [location=join(265..13455,13455..21542)] [gbkey=CDS]	'108: VPHV'; '997: IPSV'; '1002: VPPV'; '1114: GPNV'; '1654: YPQV'; '2847: CPLV'; '2881: LPRV'; '3010: LPGV'; '3097: LPGV'; '3442: GPFV'; '4218: GPKV'; '4481: CPAV'; '4619: VPIV'; '4715: GPLV'; '4726: VPFV';	15
		lcl|MG772933.1_prot_AVP78031.1_2 [protein=spike protein] [protein_id=AVP78031.1] [location=21549..25289] [gbkey=CDS]	'343: FPSV';	1
[FILV]PxV	2
		lcl|MG772933.1_prot_AVP78030.1_1 [protein=non-structural polyprotein 1ab] [exception=ribosomal slippage] [protein_id=AVP78030.1] [location=join(265..13455,13455..21542)] [gbkey=CDS]	'108: VPHV'; '997: IPSV'; '1002: VPPV'; '2881: LPRV'; '3010: LPGV'; '3097: LPGV'; '4619: VPIV'; '4726: VPFV';	8
		lcl|MG772933.1_prot_AVP78031.1_2 [protein=spike protein] [protein_id=AVP78031.1] [location=21549..25289] [gbkey=CDS]	'343: FPSV';	1
DGE	1
		lcl|MG772933.1_prot_AVP78030.1_1 [protein=non-structural polyprotein 1ab] [exception=ribosomal slippage] [protein_id=AVP78030.1] [location=join(265..13455,13455..21542)] [gbkey=CDS]	'1543: DGE';	1
DLxxL	2
		lcl|MG772933.1_prot_AVP78030.1_1 [protein=non-structural polyprotein 1ab] [exception=ribosomal slippage] [protein_id=AVP78030.1] [location=join(265..13455,13455..21542)] [gbkey=CDS]	'1936: DLNQL'; '6973: DLYKL';	2
		lcl|MG772933.1_prot_AVP78031.1_2 [protein=spike protein] [protein_id=AVP78031.1] [location=21549..25289] [gbkey=CDS]	'1172: DLQEL';	1
IDA	2
		lcl|MG772933.1_prot_AVP78030.1_1 [protein=non-structural polyprotein 1ab] [exception=ribosomal slippage] [protein_id=AVP78030.1] [location=join(265..13455,13455..21542)] [gbkey=CDS]	'581: IDA'; '3831: IDA'; '5252: IDA';	3
		lcl|MG772933.1_prot_AVP78038.1_9 [protein=nucleocapsid protein] [protein_id=AVP78038.1] [location=28179..29438] [gbkey=CDS]	'357: IDA';	1
LDI	2
		lcl|MG772933.1_prot_AVP78030.1_1 [protein=non-structural polyprotein 1ab] [exception=ribosomal slippage] [protein_id=AVP78030.1] [location=join(265..13455,13455..21542)] [gbkey=CDS]	'3037: LDI'; '3506: LDI'; '3663: LDI';	3
		lcl|MG772933.1_prot_AVP78031.1_2 [protein=spike protein] [protein_id=AVP78031.1] [location=21549..25289] [gbkey=CDS]	'562: LDI';	1
LDV	0
RGD	2
		lcl|MG772933.1_prot_AVP78030.1_1 [protein=non-structural polyprotein 1ab] [exception=ribosomal slippage] [protein_id=AVP78030.1] [location=join(265..13455,13455..21542)] [gbkey=CDS]	'1526: RGD';	1
		lcl|MG772933.1_prot_AVP78031.1_2 [protein=spike protein] [protein_id=AVP78031.1] [location=21549..25289] [gbkey=CDS]	'245: RGD';	1
RGDLxxL	0
SDI	1
		lcl|MG772933.1_prot_AVP78030.1_1 [protein=non-structural polyprotein 1ab] [exception=ribosomal slippage] [protein_id=AVP78030.1] [location=join(265..13455,13455..21542)] [gbkey=CDS]	'2657: SDI'; '6382: SDI';	2
YGL	0
RxLR	0
[LI]xCx[DE]	3
		lcl|MG772933.1_prot_AVP78030.1_1 [protein=non-structural polyprotein 1ab] [exception=ribosomal slippage] [protein_id=AVP78030.1] [location=join(265..13455,13455..21542)] [gbkey=CDS]	'1841: LYCID'; '4687: INCLD'; '6779: LWCKD';	3
		lcl|MG772933.1_prot_AVP78032.1_3 [protein=hypothetical protein] [protein_id=AVP78032.1] [location=25298..26125] [gbkey=CDS]	'169: ITCGD';	1
		lcl|MG772933.1_prot_AVP78037.1_8 [protein=hypothetical protein] [protein_id=AVP78037.1] [location=27799..28164] [gbkey=CDS]	'88: INCQE';	1
Cx(5)Cx(1,)Hx(6)C	1
		lcl|MG772933.1_prot_AVP78030.1_1 [protein=non-structural polyprotein 1ab] [exception=ribosomal slippage] [protein_id=AVP78030.1] [location=join(265..13455,13455..21542)] [gbkey=CDS]	'2278: CTGSIPCSVCLSGLDSLDTYPSLETIQITISSFKWDLTAFGLVAEWFLAYILFTRFFYVLGLAAIMQLFFSYFAVHFISNSWLMWLIINLVQMAPISAMVRMYIFFASFYYVWKSYVHVVDGCTSSTCMMCYKRNRATRVECTTIVNGVRRSFYVYANGGKGFCKLHNWNCINCDTFCAGSTFISDEVARDLSLQFKRPINPTDQSSYIVDSVTVKNGSIHLYFDKAGQKTYERHSLSHFVNLDNLRANNTKGSLPINVIVFDGKSKCEESSAKSASVYYSQLMCQPILLLDQALVSDVGDSAEVAVKMFDAYVNIFSSTFNVPMEKLKALVATAEAELAKNVSLDNVLSTFISAARQGFVDSDVETKDVVECLKLSHQSDIEVTGDSCNNY…	1
!x!xxxx!	11
		lcl|MG772933.1_prot_AVP78030.1_1 [protein=non-structural polyprotein 1ab] [exception=ribosomal slippage] [protein_id=AVP78030.1] [location=join(265..13455,13455..21542)] [gbkey=CDS]	'14: GPLSLPVL'; '28: VRGFGDSV'; '49: GTCGLVEV'; '60: VLPQLEQP'; '69: VFIKRSDA'; '82: GHVMVELV'; '90: AELDGIQY'; '104: LGVLVPHV'; '114: VPVAYRKV'; '130: GAGGHSYG'; '138: ADLKSFDL'; '166: GSGVTREL'; '179: GGAYTRYV'; '190: FCGPDGYP'; '198: LECIKDLL'; '206: ARAGKASY'; '266: FNGECPNF'; '274: VFPLNSTI'; '286: PRVEKKKL'; '296: FMGRIRSV'; '305: PVASPNEC'; '319: ILMKCDHC'; '334: GDFVRATC'; '357: CGYLPQNA'…	507
		lcl|MG772933.1_prot_AVP78031.1_2 [protein=spike protein] [protein_id=AVP78031.1] [location=21549..25289] [gbkey=CDS]	'2: LFFLFLQF'; '10: ALVNSQCV'; '36: GVYYPDTI'; '49: LVLSQGYF'; '58: PFYSNVSW'; '67: YSLTTNNA'; '82: PILDFKDG'; '103: GWIFGTTL'; '126: VIIKVCNF'; '137: YDPYLSGY'; '151: WSIREFAV'; '163: ANCTFEYV'; '176: LNISGNGG'; '191: FVFRNVDG'; '209: VNLNRGLP'; '219: LSVLQPLV'; '230: VSINITKF'; '241: LTIHRGDP'; '254: WTAFSAAY'; '264: GYLKPRTF'; '285: VDCALDPL'; '297: CTLKSLTV'; '307: GIYQTSNF'; '316: VQPTQSVV';…	92
		lcl|MG772933.1_prot_AVP78032.1_3 [protein=hypothetical protein] [protein_id=AVP78032.1] [location=25298..26125] [gbkey=CDS]	'1: MDLFMRIF'; '11: GTVTLKQG'; '35: IPIQATLP'; '43: FGWLVVGV'; '52: ILAVFQSA'; '69: WQLALSKG'; '77: VHFVCNLL'; '88: LTVYSHLL'; '96: LLAGGLEA'; '105: FLFLYALA'; '113: YCLQTVNF'; '121: VRIIMRFW'; '131: WKCRSKNP'; '139: LLYDANYF'; '147: LCWHTNCY'; '156: YCIPYNSV'; '167: IVITCGDG'; '186: IGGYTEKW'; '200: CVVLHSYF'; '212: YQLYSTQV'; '230: FFIYNKIV'; '244: VQIHTIDG'; '256: VNPAMEPI';	23
		lcl|MG772933.1_prot_AVP78033.1_4 [protein=envelope protein] [protein_id=AVP78033.1] [location=26150..26377] [gbkey=CDS]	'10: GTLIVNSV'; '18: LLFLAFVV'; '26: FLLVTLAI'; '34: LTALRLCA'; '42: YCCNIVNV'; '52: VKPSFYVY';	6
		lcl|MG772933.1_prot_AVP78034.1_5 [protein=membrane protein] [protein_id=AVP78034.1] [location=26428..27096] [gbkey=CDS]	'1: MSGDNGTI'; '20: WNLVIGFL'; '31: WICLLQFA'; '45: FLYIIKLI'; '53: FLWLLWPV'; '62: LACFVLAA'; '71: YRINWITG'; '79: GIAIAMAC'; '88: VGLMWLSY'; '96: FIASFRLF'; '112: FNPETNIL'; '122: VPLHGTIL'; '132: PLLESELV'; '140: IGAVILRG'; '149: LRIAGHHL'; '157: GRCDIKDL'; '176: LSYYKLGA'; '187: VAGDSGFA'; '199: YRIGNYKL';	19
		lcl|MG772933.1_prot_AVP78035.1_6 [protein=hypothetical protein] [protein_id=AVP78035.1] [location=27107..27292] [gbkey=CDS]	'2: FHLVDFQV'; '12: AEILLIIM'; '22: FKVSIWNL'; '33: INLIIKNL';	4
		lcl|MG772933.1_prot_AVP78036.1_7 [protein=hypothetical protein] [protein_id=AVP78036.1] [location=27299..27664] [gbkey=CDS]	'1: MKIIFFLV'; '10: ITLVTGEL'; '24: IKGTTVLL'; '38: GTYEGNSP'; '48: PLADNKFA'; '56: LACFSTQF'; '64: AFACPDGV'; '75: FQLRARSV'; '97: YSPVFLIV'; '105: AAIVFIIL';	10
		lcl|MG772933.1_prot_AVP78037.1_8 [protein=hypothetical protein] [protein_id=AVP78037.1] [location=27799..28164] [gbkey=CDS]	'1: MKFLVFLG'; '13: VAAFHQEC'; '30: PYVVDDPC'; '39: IHFYSRWY'; '49: VGARKSAP'; '58: IELCVDEV'; '74: IDIGNYTV'; '83: CSPFTINC'; '93: PKLGSLVV'; '102: CSYYEDFL'; '114: IRVVLDFI';	11
		lcl|MG772933.1_prot_AVP78038.1_9 [protein=nucleocapsid protein] [protein_id=AVP78038.1] [location=28179..29438] [gbkey=CDS]	'13: PRITFGGP'; '35: ARPKQRRP'; '53: FTALTQHG'; '64: LTFPRGQG'; '94: IRGGDGKM'; '104: LSPRWYFY'; '112: YLGTGPEA'; '122: PYGANKEG'; '130: IIWVATEG'; '155: AAIVLQLP'; '168: PKGFYAEG'; '208: ARMAGNGG'; '220: ALLLLDRL'; '236: GKGQQQQG'; '268: YNVTQAFG'; '284: GNFGDQEL'; '302: PQIAQFAP'; '313: AFFGMSRI'; '324: VTPSGTWL'; '337: IKLDDKDP'; '350: VILLNKHI'; '396: PAADLDEF';	22
		lcl|MG772933.1_prot_AVP78039.1_10 [protein=hypothetical protein] [protein_id=AVP78039.1] [location=28189..28482] [gbkey=CDS]	'1: MDPKTNVV'; '10: PALHLVDP'; '37: VDPKAYPI'; '49: GSPLSLNM'; '66: GKVFQSTP'; '74: IALKMTKL'; '85: VELPDEFV';	7
		lcl|MG772933.1_prot_AVP78040.1_11 [protein=hypothetical protein] [protein_id=AVP78040.1] [location=28639..28851] [gbkey=CDS]	'23: AEAAVKLL'; '38: ATVQETQL'; '47: AAVGELLL'; '55: LEWLAMAV';	4
!x!xxxx!xx!	11
		lcl|MG772933.1_prot_AVP78030.1_1 [protein=non-structural polyprotein 1ab] [exception=ribosomal slippage] [protein_id=AVP78030.1] [location=join(265..13455,13455..21542)] [gbkey=CDS]	'16: LSLPVLQVRDV'; '28: VRGFGDSVEEA'; '49: GTCGLVEVEKG'; '60: VLPQLEQPYVF'; '82: GHVMVELVAEL'; '104: LGVLVPHVGEV'; '130: GAGGHSYGADL'; '143: FDLGDELGTDP'; '190: FCGPDGYPLEC'; '204: LLARAGKASYA'; '266: FNGECPNFVFP'; '286: PRVEKKKLDGF'; '305: PVASPNECNQM'; '334: GDFVRATCEFC'; '358: GYLPQNAVVKL'; '369: YCPACHNPEVG'; '404: IAYGGCVFAYV'; '415: GCYNKCAYWVP'; '467: FKLNEEIAIIL'; '484: ISAFVETVKGL'; '509…	296
		lcl|MG772933.1_prot_AVP78031.1_2 [protein=spike protein] [protein_id=AVP78031.1] [location=21549..25289] [gbkey=CDS]	'2: LFFLFLQFALV'; '17: VNLTGRTPLNP'; '49: LVLSQGYFLPF'; '82: PILDFKDGIYF'; '126: VIIKVCNFDFC'; '178: ISGNGGLFNTL'; '196: VDGHFKIYSKF'; '209: VNLNRGLPTGL'; '222: LQPLVELPVSI'; '246: GDPMPNNGWTA'; '261: YFVGYLKPRTF'; '297: CTLKSLTVQKG'; '316: VQPTQSVVRFP'; '347: YAWERTKISDC'; '363: VFYNSTSFSTF'; '376: YGVSPSKLIDL'; '396: FLIRFSEVRQV'; '407: APGQTGVIADY'; '425: FTGCVIAWNTA'; '472: YDFNPNVPLEY'; '487…	51
		lcl|MG772933.1_prot_AVP78032.1_3 [protein=hypothetical protein] [protein_id=AVP78032.1] [location=25298..26125] [gbkey=CDS]	'1: MDLFMRIFTLG'; '13: VTLKQGEIKGA'; '35: IPIQATLPFGW'; '46: LVVGVAILAVF'; '69: WQLALSKGVHF'; '81: CNLLLLFLTVY'; '96: LLAGGLEATFL'; '108: LYALAYCLQTV'; '121: VRIIMRFWLCW'; '138: PLLYDANYFLC'; '186: IGGYTEKWESG'; '230: FFIYNKIVDEP'; '244: VQIHTIDGTSG';	13
		lcl|MG772933.1_prot_AVP78033.1_4 [protein=envelope protein] [protein_id=AVP78033.1] [location=26150..26377] [gbkey=CDS]	'10: GTLIVNSVLLF'; '21: LAFVVFLLVTL'; '32: AILTALRLCAY'; '44: CNIVNVSLVKP';	4
		lcl|MG772933.1_prot_AVP78034.1_5 [protein=membrane protein] [protein_id=AVP78034.1] [location=26428..27096] [gbkey=CDS]	'6: GTITVEELKKL'; '22: LVIGFLFLTWI'; '38: AYANRNRFLYI'; '49: IKLIFLWLLWP'; '60: VTLACFVLAAV'; '71: YRINWITGGIA'; '82: IAMACLVGLMW'; '93: LSYFIASFRLF'; '112: FNPETNILLNV'; '132: PLLESELVIGA'; '149: LRIAGHHLGRC'; '192: GFAAYSRYRIG';	12
		lcl|MG772933.1_prot_AVP78035.1_6 [protein=hypothetical protein] [protein_id=AVP78035.1] [location=27107..27292] [gbkey=CDS]	'2: FHLVDFQVTIA'; '17: IIMRTFKVSIW'; '33: INLIIKNLSKP';	3
		lcl|MG772933.1_prot_AVP78036.1_7 [protein=hypothetical protein] [protein_id=AVP78036.1] [location=27299..27664] [gbkey=CDS]	'3: IIFFLVLITLV'; '24: IKGTTVLLKEP'; '38: GTYEGNSPFHP'; '56: LACFSTQFAFA'; '77: LRARSVSPKLF'; '97: YSPVFLIVAAI';	6
		lcl|MG772933.1_prot_AVP78037.1_8 [protein=hypothetical protein] [protein_id=AVP78037.1] [location=27799..28164] [gbkey=CDS]	'3: FLVFLGILTTV'; '31: YVVDDPCPIHF'; '55: APLIELCVDEV'; '83: CSPFTINCQEP'; '98: LVVRCSYYEDF';	5
		lcl|MG772933.1_prot_AVP78038.1_9 [protein=nucleocapsid protein] [protein_id=AVP78038.1] [location=28179..29438] [gbkey=CDS]	'35: ARPKQRRPQGL'; '64: LTFPRGQGVPI'; '94: IRGGDGKMKEL'; '106: PRWYFYYLGTG'; '122: PYGANKEGIIW'; '157: IVLQLPQGTTL'; '168: PKGFYAEGSRG'; '208: ARMAGNGGDTA'; '220: ALLLLDRLNQL'; '236: GKGQQQQGQTV'; '268: YNVTQAFGRRG'; '307: FAPSASAFFGM'; '326: PSGTWLTYHGA'; '350: VILLNKHIDAY';	14
		lcl|MG772933.1_prot_AVP78039.1_10 [protein=hypothetical protein] [protein_id=AVP78039.1] [location=28189..28482] [gbkey=CDS]	'1: MDPKTNVVHPA'; '39: PKAYPIILHLG'; '54: LNMARKTLRSL'; '66: GKVFQSTPIAL';	4
		lcl|MG772933.1_prot_AVP78040.1_11 [protein=hypothetical protein] [protein_id=AVP78040.1] [location=28639..28851] [gbkey=CDS]	'23: AEAAVKLLHAP'; '38: ATVQETQLQAA'; '50: GELLLLEWLAM';	3
!xxxx!xx!	11
		lcl|MG772933.1_prot_AVP78030.1_1 [protein=non-structural polyprotein 1ab] [exception=ribosomal slippage] [protein_id=AVP78030.1] [location=join(265..13455,13455..21542)] [gbkey=CDS]	'15: PLSLPVLQV'; '27: LVRGFGDSV'; '46: LKDGTCGLV'; '56: VEKGVLPQL'; '71: IKRSDARTA'; '80: PHGHVMVEL'; '89: VAELDGIQY'; '101: GETLGVLVP'; '122: LLRKNGNKG'; '132: GGHSYGADL'; '145: LGDELGTDP'; '161: WNTKHGSGV'; '177: LNGGAYTRY'; '190: FCGPDGYPL'; '200: CIKDLLARA'; '214: ALSEQLDFI'; '249: YELQTPFEI'; '263: FDTFNGECP'; '276: PLNSTIKTI'; '288: VEKKKLDGF'; '298: GRIRSVYPV'; '307: ASPNECNQM'; '326: CGET…	491
		lcl|MG772933.1_prot_AVP78031.1_2 [protein=spike protein] [protein_id=AVP78031.1] [location=21549..25289] [gbkey=CDS]	'1: MLFFLFLQF'; '11: LVNSQCVNL'; '49: LVLSQGYFL'; '58: PFYSNVSWY'; '84: LDFKDGIYF'; '118: LIVNNATNV'; '128: IKVCNFDFC'; '151: WSIREFAVY'; '162: YANCTFEYV'; '175: MLNISGNGG'; '188: LREFVFRNV'; '198: GHFKIYSKF'; '211: LNRGLPTGL'; '221: VLQPLVELP'; '232: INITKFRTL'; '241: LTIHRGDPM'; '254: WTAFSAAYF'; '263: VGYLKPRTF'; '279: GTITDAVDC'; '299: LKSLTVQKG'; '318: PTQSVVRFP'; '332: CPFHKVFNA'; '349: WER…	78
		lcl|MG772933.1_prot_AVP78032.1_3 [protein=hypothetical protein] [protein_id=AVP78032.1] [location=25298..26125] [gbkey=CDS]	'3: LFMRIFTLG'; '15: LKQGEIKGA'; '36: PIQATLPFG'; '45: WLVVGVAIL'; '54: AVFQSASKI'; '71: LALSKGVHF'; '80: VCNLLLLFL'; '90: VYSHLLLLA'; '100: GLEATFLFL'; '110: ALAYCLQTV'; '120: FVRIIMRFW'; '133: CRSKNPLLY'; '148: CWHTNCYDY'; '163: VTSSIVITC'; '179: ISEDDYQIG'; '188: GYTEKWESG'; '206: YFTSDYYQL'; '225: VEHVTFFIY'; '246: IHTIDGTSG'; '255: VVNPAMEPI';	20
		lcl|MG772933.1_prot_AVP78033.1_4 [protein=envelope protein] [protein_id=AVP78033.1] [location=26150..26377] [gbkey=CDS]	'5: VSEETGTLI'; '14: VNSVLLFLA'; '23: FVVFLLVTL'; '32: AILTALRLC'; '41: AYCCNIVNV'; '51: LVKPSFYVY'; '65: LNSSRVPDL';	7
		lcl|MG772933.1_prot_AVP78034.1_5 [protein=membrane protein] [protein_id=AVP78034.1] [location=26428..27096] [gbkey=CDS]	'8: ITVEELKKL'; '17: LEQWNLVIG'; '26: FLFLTWICL'; '40: ANRNRFLYI'; '49: IKLIFLWLL'; '58: WPVTLACFV'; '68: AAVYRINWI'; '78: GGIAIAMAC'; '87: LVGLMWLSY'; '104: ARTRSMWSF'; '114: PETNILLNV'; '124: LHGTILTRP'; '133: LLESELVIG'; '144: ILRGHLRIA'; '156: LGRCDIKDL'; '171: ATSRTLSYY'; '187: VAGDSGFAA'; '196: YSRYRIGNY';	18
		lcl|MG772933.1_prot_AVP78035.1_6 [protein=hypothetical protein] [protein_id=AVP78035.1] [location=27107..27292] [gbkey=CDS]	'4: LVDFQVTIA'; '14: ILLIIMRTF'; '24: VSIWNLDYI'; '35: LIIKNLSKP'; '44: PTENNCSQL';	5
		lcl|MG772933.1_prot_AVP78036.1_7 [protein=hypothetical protein] [protein_id=AVP78036.1] [location=27299..27664] [gbkey=CDS]	'1: MKIIFFLVL'; '10: ITLVTGELY'; '26: GTTVLLKEP'; '40: YEGNSPFHP'; '49: LADNKFALA'; '58: CFSTQFAFA'; '79: ARSVSPKLF'; '96: LYSPVFLIV'; '105: AAIVFIILC';	9
		lcl|MG772933.1_prot_AVP78037.1_8 [protein=hypothetical protein] [protein_id=AVP78037.1] [location=27799..28164] [gbkey=CDS]	'1: MKFLVFLGI'; '25: CAQHQPYVV'; '37: CPIHFYSRW'; '50: GARKSAPLI'; '65: VGSKSPIQY'; '85: PFTINCQEP'; '100: VRCSYYEDF'; '109: LEYHDIRVV';	8
		lcl|MG772933.1_prot_AVP78038.1_9 [protein=nucleocapsid protein] [protein_id=AVP78038.1] [location=28179..29438] [gbkey=CDS]	'12: APRITFGGP'; '37: PKQRRPQGL'; '64: LTFPRGQGV'; '96: GGDGKMKEL'; '106: PRWYFYYLG'; '116: GPEAGLPYG'; '125: ANKEGIIWV'; '134: ATEGALNTP'; '147: GTRNPANNA'; '156: AIVLQLPQG'; '167: LPKGFYAEG'; '199: PGSSRGTSP'; '210: MAGNGGDTA'; '219: LALLLLDRL'; '238: GQQQQGQTV'; '270: VTQAFGRRG'; '279: PEQTQGNFG'; '308: APSASAFFG'; '328: GTWLTYHGA'; '352: LLNKHIDAY'; '392: VTLLPAADL';	21
		lcl|MG772933.1_prot_AVP78039.1_10 [protein=hypothetical protein] [protein_id=AVP78039.1] [location=28189..28482] [gbkey=CDS]	'3: PKTNVVHPA'; '29: AMVHDLNNV'; '41: AYPIILHLG'; '56: MARKTLRSL'; '68: VFQSTPIAL'; '88: PDEFVVVTV';	6
		lcl|MG772933.1_prot_AVP78040.1_11 [protein=hypothetical protein] [protein_id=AVP78040.1] [location=28639..28851] [gbkey=CDS]	'1: MLQSCYNFL'; '17: ASTQKGAEA'; '32: APHHVVATV'; '45: LQAAVGELL'; '54: LLEWLAMAV';	5
[FILV]x[FILV]xxxx[FILV]	10
		lcl|MG772933.1_prot_AVP78030.1_1 [protein=non-structural polyprotein 1ab] [exception=ribosomal slippage] [protein_id=AVP78030.1] [location=join(265..13455,13455..21542)] [gbkey=CDS]	'16: LSLPVLQV'; '54: VEVEKGVL'; '104: LGVLVPHV'; '114: VPVAYRKV'; '473: IAIILASF'; '679: FKLVNKFL'; '693: IIIGGAKL'; '703: LNLGETFV'; '740: IFLEGETL'; '756: VVLKTGVL'; '783: VCINGLML'; '823: VTFGDDTV'; '959: LEFGATSF'; '1006: LQVESTPV'; '1027: LKLTDNVF'; '1051: VVVNAANV'; '1092: LIVGGGCV'; '1110: LHVVGPNV'; '1157: LRVCVETV'; '1170: LVVFDKNL'; '1349: FYILPSII'; '1405: IKIQEGVV'; '1540: FHLDGETI'; …	111
		lcl|MG772933.1_prot_AVP78031.1_2 [protein=spike protein] [protein_id=AVP78031.1] [location=21549..25289] [gbkey=CDS]	'2: LFFLFLQF'; '49: LVLSQGYF'; '126: VIIKVCNF'; '219: LSVLQPLV'; '230: VSINITKF'; '384: IDLCFTSV'; '396: FLIRFSEV'; '487: VVVLSFEL'; '516: VNFNFNGL'; '562: LDITPCSF'; '585: VAVLYQDV'; '725: LLLQYGSF'; '794: LLFNKVTL'; '831: LTVLPPLL'; '882: IGVTQNVL'; '1034: VFLHVTYI'; '1103: IGIINNTV'; '1191: LGFIAGLI';	18
		lcl|MG772933.1_prot_AVP78032.1_3 [protein=hypothetical protein] [protein_id=AVP78032.1] [location=25298..26125] [gbkey=CDS]	'8: FTLGTVTL'; '41: LPFGWLVV'; '77: VHFVCNLL'; '88: LTVYSHLL'; '230: FFIYNKIV';	5
		lcl|MG772933.1_prot_AVP78033.1_4 [protein=envelope protein] [protein_id=AVP78033.1] [location=26150..26377] [gbkey=CDS]	'12: LIVNSVLL'; '21: LAFVVFLL'; '49: VSLVKPSF';	3
		lcl|MG772933.1_prot_AVP78034.1_5 [protein=membrane protein] [protein_id=AVP78034.1] [location=26428..27096] [gbkey=CDS]	'22: LVIGFLFL'; '46: LYIIKLIF'; '60: VTLACFVL'; '80: IAIAMACL'; '122: VPLHGTIL'; '138: LVIGAVIL'; '149: LRIAGHHL';	7
		lcl|MG772933.1_prot_AVP78035.1_6 [protein=hypothetical protein] [protein_id=AVP78035.1] [location=27107..27292] [gbkey=CDS]	'2: FHLVDFQV'; '15: LLIIMRTF'; '33: INLIIKNL';	3
		lcl|MG772933.1_prot_AVP78036.1_7 [protein=hypothetical protein] [protein_id=AVP78036.1] [location=27299..27664] [gbkey=CDS]	'3: IIFFLVLI'; '75: FQLRARSV'; '100: VFLIVAAI'; '109: FIILCFTF';	4
		lcl|MG772933.1_prot_AVP78037.1_8 [protein=hypothetical protein] [protein_id=AVP78037.1] [location=27799..28164] [gbkey=CDS]	'3: FLVFLGIL'; '58: IELCVDEV'; '74: IDIGNYTV'; '114: IRVVLDFI';	4
		lcl|MG772933.1_prot_AVP78038.1_9 [protein=nucleocapsid protein] [protein_id=AVP78038.1] [location=28179..29438] [gbkey=CDS]	'350: VILLNKHI';	1
		lcl|MG772933.1_prot_AVP78039.1_10 [protein=hypothetical protein] [protein_id=AVP78039.1] [location=28189..28482] [gbkey=CDS]	'12: LHLVDPQI'; '74: IALKMTKL'; '85: VELPDEFV';	3
[FILV]x[FILV]xxxx[FILV]xx[FILV]	8
		lcl|MG772933.1_prot_AVP78030.1_1 [protein=non-structural polyprotein 1ab] [exception=ribosomal slippage] [protein_id=AVP78030.1] [location=join(265..13455,13455..21542)] [gbkey=CDS]	'16: LSLPVLQVRDV'; '54: VEVEKGVLPQL'; '104: LGVLVPHVGEV'; '693: IIIGGAKLKAL'; '756: VVLKTGVLQPL'; '783: VCINGLMLLEI'; '823: VTFGDDTVIEV'; '1593: IYLDGADVTKI'; '2229: FLLLSVCLGSL'; '2345: LFFSYFAVHFI'; '2566: LLLDQALVSDV'; '2598: FNVPMEKLKAL'; '2772: VTLVFLFITVI'; '2878: LHFLPRVFSAV'; '3020: VNLLTNMFTPL'; '3080: LFFMSFTVLCL'; '3132: VPFWMTIVYVI'; '3161: VVFNGVSFSTF'; '3187: LKLRSDVLLPL'; '3581: LT…	34
		lcl|MG772933.1_prot_AVP78031.1_2 [protein=spike protein] [protein_id=AVP78031.1] [location=21549..25289] [gbkey=CDS]	'2: LFFLFLQFALV'; '49: LVLSQGYFLPF'; '230: VSINITKFRTL'; '396: FLIRFSEVRQV'; '562: LDITPCSFGGV'; '1191: LGFIAGLIAIV';	6
		lcl|MG772933.1_prot_AVP78032.1_3 [protein=hypothetical protein] [protein_id=AVP78032.1] [location=25298..26125] [gbkey=CDS]	'46: LVVGVAILAVF'; '77: VHFVCNLLLLF';	2
		lcl|MG772933.1_prot_AVP78033.1_4 [protein=envelope protein] [protein_id=AVP78033.1] [location=26150..26377] [gbkey=CDS]	'17: VLLFLAFVVFL';	1
		lcl|MG772933.1_prot_AVP78034.1_5 [protein=membrane protein] [protein_id=AVP78034.1] [location=26428..27096] [gbkey=CDS]	'22: LVIGFLFLTWI'; '46: LYIIKLIFLWL'; '60: VTLACFVLAAV'; '80: IAIAMACLVGL';	4
		lcl|MG772933.1_prot_AVP78035.1_6 [protein=hypothetical protein] [protein_id=AVP78035.1] [location=27107..27292] [gbkey=CDS]	'7: FQVTIAEILLI'; '22: FKVSIWNLDYI';	2
		lcl|MG772933.1_prot_AVP78036.1_7 [protein=hypothetical protein] [protein_id=AVP78036.1] [location=27299..27664] [gbkey=CDS]	'3: IIFFLVLITLV'; '100: VFLIVAAIVFI';	2
		lcl|MG772933.1_prot_AVP78037.1_8 [protein=hypothetical protein] [protein_id=AVP78037.1] [location=27799..28164] [gbkey=CDS]	'3: FLVFLGILTTV';	1
[FILV]xxxx[FILV]xx[FILV]	10
		lcl|MG772933.1_prot_AVP78030.1_1 [protein=non-structural polyprotein 1ab] [exception=ribosomal slippage] [protein_id=AVP78030.1] [location=join(265..13455,13455..21542)] [gbkey=CDS]	'18: LPVLQVRDV'; '56: VEKGVLPQL'; '84: VMVELVAEL'; '106: VLVPHVGEV'; '149: LGTDPIEDF'; '288: VEKKKLDGF'; '360: LPQNAVVKL'; '446: LNDNLLEIL'; '459: VNINIVGDF'; '494: LDYKTFKQI'; '562: LQKAAIIIL'; '573: ISQYSLRLI'; '695: IGGAKLKAL'; '758: LKTGVLQPL'; '783: VCINGLMLL'; '825: FGDDTVIEV'; '875: VADAVIKTL'; '992: VEENKIPSV'; '1105: LAKNCLHVV'; '1149: FGADPVHSL'; '1177: LYDKLVSSF'; '1245: LTENLLLYI'; '1…	110
		lcl|MG772933.1_prot_AVP78031.1_2 [protein=spike protein] [protein_id=AVP78031.1] [location=21549..25289] [gbkey=CDS]	'4: FLFLQFALV'; '51: LSQGYFLPF'; '188: LREFVFRNV'; '232: INITKFRTL'; '323: VRFPNITNV'; '338: FNATRFPSV'; '378: VSPSKLIDL'; '398: IRFSEVRQV'; '487: VVVLSFELL'; '564: ITPCSFGGV'; '770: FGGFNFSQI'; '791: IEDLLFNKV'; '823: ICAQKFNGL'; '949: VLNDILSRL'; '969: LITGRLQSL'; '1033: VVFLHVTYI'; '1137: IDLGDISGI'; '1189: VWLGFIAGL'; '1198: IAIVMVTIL';	19
		lcl|MG772933.1_prot_AVP78032.1_3 [protein=hypothetical protein] [protein_id=AVP78032.1] [location=25298..26125] [gbkey=CDS]	'47: VVGVAILAV'; '79: FVCNLLLLF'; '115: LQTVNFVRI';	3
		lcl|MG772933.1_prot_AVP78033.1_4 [protein=envelope protein] [protein_id=AVP78033.1] [location=26150..26377] [gbkey=CDS]	'12: LIVNSVLLF'; '21: LAFVVFLLV'; '65: LNSSRVPDL';	3
		lcl|MG772933.1_prot_AVP78034.1_5 [protein=membrane protein] [protein_id=AVP78034.1] [location=26428..27096] [gbkey=CDS]	'8: ITVEELKKL'; '24: IGFLFLTWI'; '46: LYIIKLIFL'; '57: LWPVTLACF'; '82: IAMACLVGL'; '156: LGRCDIKDL';	6
		lcl|MG772933.1_prot_AVP78035.1_6 [protein=hypothetical protein] [protein_id=AVP78035.1] [location=27107..27292] [gbkey=CDS]	'9: VTIAEILLI'; '24: VSIWNLDYI';	2
		lcl|MG772933.1_prot_AVP78036.1_7 [protein=hypothetical protein] [protein_id=AVP78036.1] [location=27299..27664] [gbkey=CDS]	'4: IFFLVLITL'; '96: LYSPVFLIV';	2
		lcl|MG772933.1_prot_AVP78037.1_8 [protein=hypothetical protein] [protein_id=AVP78037.1] [location=27799..28164] [gbkey=CDS]	'5: VFLGILTTV'; '57: LIELCVDEV'; '109: LEYHDIRVV';	3
		lcl|MG772933.1_prot_AVP78038.1_9 [protein=nucleocapsid protein] [protein_id=AVP78038.1] [location=28179..29438] [gbkey=CDS]	'219: LALLLLDRL'; '395: LPAADLDEF';	2
		lcl|MG772933.1_prot_AVP78039.1_10 [protein=hypothetical protein] [protein_id=AVP78039.1] [location=28189..28482] [gbkey=CDS]	'7: VVHPALHLV';	1
W[ST]xCxVTCG	0
L!x![DE]	6
		lcl|MG772933.1_prot_AVP78030.1_1 [protein=non-structural polyprotein 1ab] [exception=ribosomal slippage] [protein_id=AVP78030.1] [location=join(265..13455,13455..21542)] [gbkey=CDS]	'53: LVEVE'; '61: LPQLE'; '320: LMKCD'; '788: LMLLE'; '1170: LVVFD'; '1250: LLYID'; '1375: LAHAE'; '1841: LYCID'; '3804: LGVYD'; '4653: LIKWD'; '4658: LLKYD'; '4668: LCLFD'; '4858: LFVVE'; '5002: LMGWD'; '5217: LPYPD'; '5452: LFAAE'; '6332: LPGCD'; '6710: LLKLE';	18
		lcl|MG772933.1_prot_AVP78031.1_2 [protein=spike protein] [protein_id=AVP78031.1] [location=21549..25289] [gbkey=CDS]	'627: LIGAE'; '1176: LGKYE';	2
		lcl|MG772933.1_prot_AVP78034.1_5 [protein=membrane protein] [protein_id=AVP78034.1] [location=26428..27096] [gbkey=CDS]	'156: LGRCD';	1
		lcl|MG772933.1_prot_AVP78036.1_7 [protein=hypothetical protein] [protein_id=AVP78036.1] [location=27299..27664] [gbkey=CDS]	'12: LVTGE';	1
		lcl|MG772933.1_prot_AVP78038.1_9 [protein=nucleocapsid protein] [protein_id=AVP78038.1] [location=28179..29438] [gbkey=CDS]	'221: LLLLD'; '395: LPAAD';	2
		lcl|MG772933.1_prot_AVP78040.1_11 [protein=hypothetical protein] [protein_id=AVP78040.1] [location=28639..28851] [gbkey=CDS]	'52: LLLLE';	1
L[FILV]x[FILV][DE]	3
		lcl|MG772933.1_prot_AVP78030.1_1 [protein=non-structural polyprotein 1ab] [exception=ribosomal slippage] [protein_id=AVP78030.1] [location=join(265..13455,13455..21542)] [gbkey=CDS]	'53: LVEVE'; '1170: LVVFD'; '1250: LLYID'; '4858: LFVVE'; '6710: LLKLE';	5
		lcl|MG772933.1_prot_AVP78038.1_9 [protein=nucleocapsid protein] [protein_id=AVP78038.1] [location=28179..29438] [gbkey=CDS]	'221: LLLLD';	1
		lcl|MG772933.1_prot_AVP78040.1_11 [protein=hypothetical protein] [protein_id=AVP78040.1] [location=28639..28851] [gbkey=CDS]	'52: LLLLE';	1
L[LI][DEN][LF][DE]	0
PWxxW	1
		lcl|MG772933.1_prot_AVP78031.1_2 [protein=spike protein] [protein_id=AVP78031.1] [location=21549..25289] [gbkey=CDS]	'1186: PWYVW';	1
[GE][KR]Q[GE]RL	0
[RK]RQ[RK]RF	0
[LM]VxSxVxA	0
KKKRGLF	0
[QE][ST]RGLF	0
KSS[RG]LF	0
RSS[RG]LF	0
[KR]xTQT	0
G[IV]QVD	0
DSGxxS	0
[ENT][HNPS][ILV]Y[ADEG]	2
		lcl|MG772933.1_prot_AVP78031.1_2 [protein=spike protein] [protein_id=AVP78031.1] [location=21549..25289] [gbkey=CDS]	'389: TSVYA';	1
		lcl|MG772933.1_prot_AVP78032.1_3 [protein=hypothetical protein] [protein_id=AVP78032.1] [location=25298..26125] [gbkey=CDS]	'261: EPIYD';	1
EDLY	0
EHIYD	0
EHLYA	0
ENIYE	0
EPIYA	0
EPIYG	0
EPLYA	0
EPVYA	0
ESIYE	0
NPLYE	0
TPLYA	0
RxLx[EQD]	3
		lcl|MG772933.1_prot_AVP78030.1_1 [protein=non-structural polyprotein 1ab] [exception=ribosomal slippage] [protein_id=AVP78030.1] [location=join(265..13455,13455..21542)] [gbkey=CDS]	'5277: RKLHD'; '5899: RDLYD'; '6646: RDLED'; '6813: RMLLE';	4
		lcl|MG772933.1_prot_AVP78031.1_2 [protein=spike protein] [protein_id=AVP78031.1] [location=21549..25289] [gbkey=CDS]	'1164: RNLNE';	1
		lcl|MG772933.1_prot_AVP78034.1_5 [protein=membrane protein] [protein_id=AVP78034.1] [location=26428..27096] [gbkey=CDS]	'131: RPLLE';	1
N{P}[ST]{P}	7
		lcl|MG772933.1_prot_AVP78030.1_1 [protein=non-structural polyprotein 1ab] [exception=ribosomal slippage] [protein_id=AVP78030.1] [location=join(265..13455,13455..21542)] [gbkey=CDS]	'278: NSTI'; '348: NLTK'; '389: NESG'; '434: NHTG'; '810: NNTF'; '840: NITF'; '859: NYTV'; '1022: NFTG'; '1438: NETL'; '1647: NHTK'; '1715: NKTV'; '1918: NASF'; '1992: NATN'; '2098: NSSL'; '2218: NFSK'; '2268: NSTN'; '2494: NGSI'; '2526: NNTK'; '2619: NVSL'; '3392: NFTI'; '3401: NGSC'; '3739: NYSG'; '4169: NNSK'; '4252: NATE'; '4259: NSTV'; '5035: NLSH'; '5299: NTSR'; '5422: NVTD'; '5577: NISD'; …	36
		lcl|MG772933.1_prot_AVP78031.1_2 [protein=spike protein] [protein_id=AVP78031.1] [location=21549..25289] [gbkey=CDS]	'18: NLTG'; '28: NYTN'; '62: NVSW'; '112: NTSQ'; '122: NATN'; '148: NKTW'; '164: NCTF'; '177: NISG'; '233: NITK'; '278: NGTI'; '327: NITN'; '339: NATR'; '366: NSTS'; '580: NTSL'; '593: NCTD'; '634: NASY'; '682: NNSI'; '690: NFSI'; '774: NFSQ'; '1047: NFTT'; '1071: NGTH'; '1107: NNTV'; '1131: NHTS'; '1146: NASV'; '1167: NESL';	25
		lcl|MG772933.1_prot_AVP78033.1_4 [protein=envelope protein] [protein_id=AVP78033.1] [location=26150..26377] [gbkey=CDS]	'48: NVSL'; '66: NSSR';	2
		lcl|MG772933.1_prot_AVP78034.1_5 [protein=membrane protein] [protein_id=AVP78034.1] [location=26428..27096] [gbkey=CDS]	'5: NGTI';	1
		lcl|MG772933.1_prot_AVP78035.1_6 [protein=hypothetical protein] [protein_id=AVP78035.1] [location=27107..27292] [gbkey=CDS]	'39: NLSK'; '48: NCSQ';	2
		lcl|MG772933.1_prot_AVP78037.1_8 [protein=hypothetical protein] [protein_id=AVP78037.1] [location=27799..28164] [gbkey=CDS]	'78: NYTV';	1
		lcl|MG772933.1_prot_AVP78038.1_9 [protein=nucleocapsid protein] [protein_id=AVP78038.1] [location=28179..29438] [gbkey=CDS]	'47: NNTA'; '63: NLTF'; '77: NSSK'; '192: NSSR'; '269: NVTQ';	5
AxxxAxxxAxxxW	0
VxxxIxxLxxxL	1
		lcl|MG772933.1_prot_AVP78030.1_1 [protein=non-structural polyprotein 1ab] [exception=ribosomal slippage] [protein_id=AVP78030.1] [location=join(265..13455,13455..21542)] [gbkey=CDS]	'886: VSELIIPLGIDL';	1
+++xx+	0
++x+	2
		lcl|MG772933.1_prot_AVP78030.1_1 [protein=non-structural polyprotein 1ab] [exception=ribosomal slippage] [protein_id=AVP78030.1] [location=join(265..13455,13455..21542)] [gbkey=CDS]	'1045: KKVK'; '1226: KKIK'; '1343: KKCK'; '1400: RKYK'; '1650: KKWK'; '2410: KRNR'; '3626: KHKH'; '3974: KKLK'; '4017: KRAK'; '5277: RKLH'; '5784: HKEK'; '6002: RHVR'; '6294: HHDK';	13
		lcl|MG772933.1_prot_AVP78038.1_9 [protein=nucleocapsid protein] [protein_id=AVP78038.1] [location=28179..29438] [gbkey=CDS]	'92: RRIR'; '256: KKPR'; '369: KKDK';	3
KKTK	0
GPG[RQ]	0
KRIHIGPGRAFYTT	0
[GD]DIWK	0
LxxLL	4
		lcl|MG772933.1_prot_AVP78030.1_1 [protein=non-structural polyprotein 1ab] [exception=ribosomal slippage] [protein_id=AVP78030.1] [location=join(265..13455,13455..21542)] [gbkey=CDS]	'1140: LAPLL'; '1552: LKTLL'; '2168: LFTLL'; '3527: LKELL'; '3584: LTSLL'; '3792: LFCLL'; '3911: LSVLL';	7
		lcl|MG772933.1_prot_AVP78031.1_2 [protein=spike protein] [protein_id=AVP78031.1] [location=21549..25289] [gbkey=CDS]	'834: LPPLL';	1
		lcl|MG772933.1_prot_AVP78034.1_5 [protein=membrane protein] [protein_id=AVP78034.1] [location=26428..27096] [gbkey=CDS]	'13: LKKLL';	1
		lcl|MG772933.1_prot_AVP78038.1_9 [protein=nucleocapsid protein] [protein_id=AVP78038.1] [location=28179..29438] [gbkey=CDS]	'219: LALLL';	1
Cx(2)Cx(6)Wx(3)Dx(5)Hx(6)C	0
xYxDx	3
		lcl|MG772933.1_prot_AVP78030.1_1 [protein=non-structural polyprotein 1ab] [exception=ribosomal slippage] [protein_id=AVP78030.1] [location=join(265..13455,13455..21542)] [gbkey=CDS]	'184: RYVDN'; '1251: LYIDI'; '1506: SYKDW'; '1593: IYLDG'; '2094: AYVDN'; '2499: LYFDK'; '2900: EYTDF'; '3312: NYEDL'; '3696: VYDDG'; '4275: AYKDY'; '4676: KYWDQ'; '4866: KYFDC'; '4902: LYYDS'; '4908: SYEDQ'; '4993: VYSDV'; '5218: PYPDP'; '5264: EYADV'; '5524: DYGDA'; '6044: GYVDT'; '6367: YYSDS'; '6414: QYLDA'; '6684: VYGDF'; '6823: NYGDS';	23
		lcl|MG772933.1_prot_AVP78031.1_2 [protein=spike protein] [protein_id=AVP78031.1] [location=21549..25289] [gbkey=CDS]	'38: YYPDT'; '391: VYADT'; '588: LYQDV'; '809: QYGDC';	4
		lcl|MG772933.1_prot_AVP78037.1_8 [protein=hypothetical protein] [protein_id=AVP78037.1] [location=27799..28164] [gbkey=CDS]	'72: QYIDI'; '104: YYEDF'; '110: EYHDI';	3
PxxP	4
		lcl|MG772933.1_prot_AVP78030.1_1 [protein=non-structural polyprotein 1ab] [exception=ribosomal slippage] [protein_id=AVP78030.1] [location=join(265..13455,13455..21542)] [gbkey=CDS]	'1912: PNQP'; '2476: PINP'; '2863: PGLP'; '3130: PLVP'; '3355: PKTP'; '4216: PKGP'; '5492: PRPP'; '5964: PGIP';	8
		lcl|MG772933.1_prot_AVP78031.1_2 [protein=spike protein] [protein_id=AVP78031.1] [location=21549..25289] [gbkey=CDS]	'24: PLNP'; '476: PNVP'; '782: PSKP'; '1113: PLQP';	4
		lcl|MG772933.1_prot_AVP78036.1_7 [protein=hypothetical protein] [protein_id=AVP78036.1] [location=27299..27664] [gbkey=CDS]	'45: PFHP';	1
		lcl|MG772933.1_prot_AVP78038.1_9 [protein=nucleocapsid protein] [protein_id=AVP78038.1] [location=28179..29438] [gbkey=CDS]	'365: PTEP';	1
YxYxx!	6
		lcl|MG772933.1_prot_AVP78030.1_1 [protein=non-structural polyprotein 1ab] [exception=ribosomal slippage] [protein_id=AVP78030.1] [location=join(265..13455,13455..21542)] [gbkey=CDS]	'2431: YVYANG'; '3105: YLYLTF'; '3210: YKYFSG'; '3496: YNYEPL'; '4841: YDYYRY'; '5214: YVYLPY'; '5861: YDYVIF'; '6156: YVYNPF';	8
		lcl|MG772933.1_prot_AVP78031.1_2 [protein=spike protein] [protein_id=AVP78031.1] [location=21549..25289] [gbkey=CDS]	'417: YNYKLP';	1
		lcl|MG772933.1_prot_AVP78032.1_3 [protein=hypothetical protein] [protein_id=AVP78032.1] [location=25298..26125] [gbkey=CDS]	'154: YDYCIP';	1
		lcl|MG772933.1_prot_AVP78033.1_4 [protein=envelope protein] [protein_id=AVP78033.1] [location=26150..26377] [gbkey=CDS]	'57: YVYSRV';	1
		lcl|MG772933.1_prot_AVP78036.1_7 [protein=hypothetical protein] [protein_id=AVP78036.1] [location=27299..27664] [gbkey=CDS]	'18: YHYQEC';	1
		lcl|MG772933.1_prot_AVP78038.1_9 [protein=nucleocapsid protein] [protein_id=AVP78038.1] [location=28179..29438] [gbkey=CDS]	'109: YFYYLG';	1
YxYxx[FILV]	2
		lcl|MG772933.1_prot_AVP78030.1_1 [protein=non-structural polyprotein 1ab] [exception=ribosomal slippage] [protein_id=AVP78030.1] [location=join(265..13455,13455..21542)] [gbkey=CDS]	'3105: YLYLTF'; '3496: YNYEPL'; '5861: YDYVIF'; '6156: YVYNPF';	4
		lcl|MG772933.1_prot_AVP78033.1_4 [protein=envelope protein] [protein_id=AVP78033.1] [location=26150..26377] [gbkey=CDS]	'57: YVYSRV';	1
NYx[EK]C[LI][KIR][NT]APYID	0
[RKY]xxPxxP	0
PxxPx[KR]	2
		lcl|MG772933.1_prot_AVP78031.1_2 [protein=spike protein] [protein_id=AVP78031.1] [location=21549..25289] [gbkey=CDS]	'782: PSKPSK';	1
		lcl|MG772933.1_prot_AVP78038.1_9 [protein=nucleocapsid protein] [protein_id=AVP78038.1] [location=28179..29438] [gbkey=CDS]	'365: PTEPKK';	1
xx[PV]xxP	7
		lcl|MG772933.1_prot_AVP78030.1_1 [protein=non-structural polyprotein 1ab] [exception=ribosomal slippage] [protein_id=AVP78030.1] [location=join(265..13455,13455..21542)] [gbkey=CDS]	'104: LGVLVP'; '304: YPVASP'; '760: TGVLQP'; '772: EAVEAP'; '998: PSVEVP'; '1110: LHVVGP'; '1293: TAVVIP'; '1440: TLVTMP'; '1471: VSVSSP'; '1777: KGVQIP'; '1910: LVPNQP'; '2037: CEVLKP'; '2046: EVVENP'; '2474: KRPINP'; '2861: VVPGLP'; '3128: FTPLVP'; '3191: SDVLLP'; '3293: DVVYCP'; '3353: ANPKTP'; '3647: NMVYMP'; '4066: LMVVVP'; '4214: DTPKGP'; '4344: KYVQIP'; '4351: TCVNDP'; '4552: DFVENP'; '470…	34
		lcl|MG772933.1_prot_AVP78031.1_2 [protein=spike protein] [protein_id=AVP78031.1] [location=21549..25289] [gbkey=CDS]	'22: RTPLNP'; '35: RGVYYP'; '219: LSVLQP'; '321: SVVRFP'; '474: FNPNVP'; '499: ATVCGP'; '551: DSVRDP'; '572: VSVITP'; '780: PDPSKP'; '831: LTVLPP'; '1108: NTVYDP';	11
		lcl|MG772933.1_prot_AVP78032.1_3 [protein=hypothetical protein] [protein_id=AVP78032.1] [location=25298..26125] [gbkey=CDS]	'235: KIVDEP'; '253: SGVVNP';	2
		lcl|MG772933.1_prot_AVP78036.1_7 [protein=hypothetical protein] [protein_id=AVP78036.1] [location=27299..27664] [gbkey=CDS]	'43: NSPFHP';	1
		lcl|MG772933.1_prot_AVP78037.1_8 [protein=hypothetical protein] [protein_id=AVP78037.1] [location=27799..28164] [gbkey=CDS]	'31: YVVDDP';	1
		lcl|MG772933.1_prot_AVP78038.1_9 [protein=nucleocapsid protein] [protein_id=AVP78038.1] [location=28179..29438] [gbkey=CDS]	'363: FPPTEP';	1
		lcl|MG772933.1_prot_AVP78039.1_10 [protein=hypothetical protein] [protein_id=AVP78039.1] [location=28189..28482] [gbkey=CDS]	'5: TNVVHP'; '83: TTVELP';	2
[ILV]QxxxRGxxx[RK]	0
Ax(3)IQx(2)FRx(4)KK	0
LRGG	0
Yxx[LI]x(6,8)Yxx[LI]	1
		lcl|MG772933.1_prot_AVP78030.1_1 [protein=non-structural polyprotein 1ab] [exception=ribosomal slippage] [protein_id=AVP78030.1] [location=join(265..13455,13455..21542)] [gbkey=CDS]	'3094: YSFLPGVYSVIYLYL'; '3779: YCFLGYFCTCYFGL';	2
[SIVL]xYxx[IVL]	6
		lcl|MG772933.1_prot_AVP78030.1_1 [protein=non-structural polyprotein 1ab] [exception=ribosomal slippage] [protein_id=AVP78030.1] [location=join(265..13455,13455..21542)] [gbkey=CDS]	'116: VAYRKV'; '1250: LLYIDI'; '1770: LSYEQL'; '2555: VYYSQL'; '2671: LTYNKV'; '2803: IGYKAI'; '2939: VAYESL'; '3103: VIYLYL'; '3411: IDYDCV'; '3738: SNYSGV'; '3759: VEYCPI'; '3777: LVYCFL'; '4624: SYYSLL'; '5642: LKYLPI'; '5859: SEYDYV'; '6073: LMYKGL'; '6215: VEYPII'; '6384: IDYVPL'; '6453: VAYNVI'; '6770: IDYTEI';	20
		lcl|MG772933.1_prot_AVP78031.1_2 [protein=spike protein] [protein_id=AVP78031.1] [location=21549..25289] [gbkey=CDS]	'64: SWYYSL'; '587: VLYQDV';	2
		lcl|MG772933.1_prot_AVP78032.1_3 [protein=hypothetical protein] [protein_id=AVP78032.1] [location=25298..26125] [gbkey=CDS]	'158: IPYNSV'; '209: SDYYQL';	2
		lcl|MG772933.1_prot_AVP78034.1_5 [protein=membrane protein] [protein_id=AVP78034.1] [location=26428..27096] [gbkey=CDS]	'176: LSYYKL';	1
		lcl|MG772933.1_prot_AVP78037.1_8 [protein=hypothetical protein] [protein_id=AVP78037.1] [location=27799..28164] [gbkey=CDS]	'71: IQYIDI'; '109: LEYHDI';	2
		lcl|MG772933.1_prot_AVP78040.1_11 [protein=hypothetical protein] [protein_id=AVP78040.1] [location=28639..28851] [gbkey=CDS]	'4: SCYNFL';	1
[RK]xxxx!x!	8
		lcl|MG772933.1_prot_AVP78030.1_1 [protein=non-structural polyprotein 1ab] [exception=ribosomal slippage] [protein_id=AVP78030.1] [location=join(265..13455,13455..21542)] [gbkey=CDS]	'11: KTHGPLSL'; '47: KDGTCGLV'; '77: RTAPHGHV'; '99: RSGETLGV'; '125: KNGNKGAG'; '174: KRELNGGA'; '244: RSEKSYEL'; '261: KKFDTFNG'; '290: KKKLDGFM'; '299: RIRSVYPV'; '338: RATCEFCG'; '399: KGGRTIAY'; '426: RASANIGC'; '456: KEKVNINI'; '468: KLNEEIAI'; '579: RLIDAMMF'; '623: KLKPVLDW'; '634: KFKEGIEF'; '650: KFISTCAC'; '680: KLVNKFLA'; '724: REETGLLL'; '734: KAPKEIIF'; '794: KDTEKYCA'; '915: KLSSHM…	167
[truncated: 241 more rows]

## Sheet: Human CoV OC43
Motif	Number of protein	Name of the proteins	Position: Sequence	Number of instance of the motif
Cx(13,20)Cx(5,6)Cx(9,19)Cx(10,14)Cx(4,14)C	0
KLGxGLxF[DN]	0
KxGGLxF[DN]	0
KRAR	0
KxGFFKR	0
SVSVGMKPSPRP	0
L[FL][VI]F[VIL]LE[LF]LLxF	0
LxCxE	0
!PxV	2
[truncated: 453 more rows]

## Sheet: Murine CoV MHV-1
Motif	Number of protein	Name of the proteins	Position: Sequence	Number of instance of the motif
Cx(13,20)Cx(5,6)Cx(9,19)Cx(10,14)Cx(4,14)C	0
KLGxGLxF[DN]	0
KxGGLxF[DN]	0
KRAR	0
KxGFFKR	0
[truncated: 516 more rows]

## Sheet: BetacCoV Erinaceus VMC
Motif	Number of protein	Name of the proteins	Position: Sequence	Number of instance of the motif
[truncated: 548 more rows]

[truncated: 3 more sheets: Tylonycteris bat CoV HKU4, Bat CoV HKU5-1, SARS CoV GZ02]
